# Supplementary material for: Integrated multi-omics analysis reveals the molecular interplay between circadian clocks and cancer pathogenesis
Source: Sci Rep. 2023 Aug 30;13:14198. doi: 10.1038/s41598-023-39401-1 (PMC10469199; doi:10.1038/s41598-023-39401-1)
Supplement: Supplementary file 1 — Supplementary Tables. [file 41598_2023_39401_MOESM1_ESM.xlsx]

## Sheet: ST_1
Supplementary Table 1. Human genes/proteins involved in the circadian rhythm (GO:0007623)
GENE SYMBOL	GENE ID	CANONICAL CLOCK GENES	CLOCK-CONTROLLED GENES	GENES MEDIATING NEURAL MECHANISMS OF CIRCADIAN RHYTHMICITY AND ITS ENTRAINMENT
AANAT	15		X
ADA	100		X
ADCY1	107			X
ADORA1	134			X
ADORA2A	135			X
ADRB1	153			X
AHCY	191			X
AHR	196			X
ALB	213		X
ANKFN1	162282			X
ARNTL	406	X
ARNTL2	56938	X
ASS1	445			X
ATF4	468		X
ATG7	10533			X
ATOH7	220202			X
BHLHE40	8553		X
BHLHE41	79365		X
BTBD9	114781			X
BTRC	8945			X
CARTPT	9607		X
CASP1	834			X
CAVIN3	112464			X
CCAR2	57805			X
CDK1	983		X
CHRNB2	1141			X
CIART	148523			X
CIPC	85457			X
CLOCK	9575	X
CORT	1325			X
CREB1	1385		X
CREM	1390		X
CRTC1	23373			X
CRY1	1407	X
CRY2	1408	X
CSF2	1437		X
CSNK1D	1453	X
CSNK1E	1454	X
CYP7B1	9420			X
DBP	1628		X
DDB1	1642			X
DDX5	1655		X
DHX9	1660			X
DPYD	1806			X
DRD1	1812			X
DRD2	1813			X
DRD3	1814			X
DRD4	1815			X
DYRK1A	1859			X
EGR1	1958		X
EP300	2033			X
EZH2	2146			X
FBXL12	54850			X
FBXL17	64839			X
FBXL21P	26223			X
FBXL22	283807			X
FBXL3	26224			X
FBXL6	26233		X
FBXL8	55336			X
FBXW11	23291			X
FBXW7	55294			X
GABRB3	2562			X
GFPT1	2673		X
GHRH	2691		X
GHRHR	2692		X
GHRL	51738			X
GPR157	80045			X
GPR176	11245			X
GSK3B	2932			X
HCRTR2	3062			X
HDAC1	3065			X
HDAC2	3066			X
HDAC3	8841			X
HNF1B	6928		X
HNF4A	3172		X
HNRNPD	3184			X
HNRNPU	3192			X
HS3ST2	9956		X
HTR7	3363			X
HUWE1	10075			X
ID1	3397		X
ID2	3398		X
ID3	3399		X
ID4	3400		X
IL6	3569		X
IMPDH2	3615		X
KCNA2	3737			X
KCND2	3751			X
KCNMA1	3778			X
KDM2A	22992			X
KDM5A	5927			X
KDM5B	10765			X
KDM5C	8242			X
KDM8	79831			X
KLF10	7071		X
KMT2A	4297		X
LEPR	3953			X
LGR4	55366			X
MAGED1	9500			X
MAGEL2	54551			X
MAPK10	5602			X
MAPK8	5599			X
MAPK9	5601			X
MAT2A	4144		X
MC3R	4159			X
METTL3	56339			X
MTA1	9112			X
MTNR1A	4543			X
MTNR1B	4544			X
MTOR	2475			X
MYBBP1A	10514			X
MYCBP2	23077		X
NAGLU	4669			X
NAMPT	10135		X
NCOA2	10499			X
NCOR1	9611			X
NDUFA9	4704			X
NFIL3	4783		X
NGFR	4804			X
NKX2-1	7080			X
NLGN1	22871		X
NMS	129521			X
NMU	10874			X
NOCT	25819			X
NONO	4841		X
NPAS2	4862	X
NPS	594857			X
NPY2R	4887			X
NR0B2	8431			X
NR1D1	9572	X
NR1D2	9975	X
NR2F6	2063			X
NRIP1	8204			X
OGT	8473			X
OPN4	94233			X
OPN5	221391			X
OPRL1	4987			X
PDE6B	5158		X
PER1	5187	X
PER2	8864	X
PER3	8863	X
PHLPP1	23239			X
PIWIL2	55124			X
PMCH	5367		X
PML	5371			X
PPARA	5465		X
PPARG	5468		X
PPARGC1A	10891		X
PPP1CA	5499		X
PPP1CB	5500		X
PPP1CC	5501		X
PRF1	5551		X
PRKAA1	5562		X
PRKAA2	5563		X
PRKCG	5582			X
PRKDC	5591			X
PRKG1	5592			X
PRKG2	5593			X
PRMT5	10419			X
PROK1	84432			X
PROK2	60675			X
PROKR1	10887			X
PROKR2	128674			X
PROX1	5629			X
PSPC1	55269			X
PTEN	5728		X
PTGDS	5730		X
PTGER3	5733		X
PTGER4	5734		X
RAI1	10743			X
RBM4	5936		X
RBM4B	83759			X
RELB	5971			X
ROCK2	9475		X
RORA	6095	X
RORB	6096	X
RORC	6097	X
SETX	23064			X
SFPQ	6421			X
SIAH2	6478			X
SIK1	150094			X
SIN3A	25942			X
SIRT1	23411		X
SIX3	6496			X
SLC25A19	60386			X
SLC6A4	6532			X
SOX14	8403			X
SPSB4	92369			X
SRRD	402055			X
SUV39H1	6839			X
SUV39H2	79723			X
TARDBP	23435			X
THRAP3	9967			X
TIMELESS	8914	X
TNFRSF11A	8792			X
TOP1	7150			X
TOP2A	7153			X
TP53	7157		X
UBE3A	7337		X
USP2	9099		X
USP7	7874			X
USP9X	8239		X
UTS2	10911		X
UTS2R	2837		X
ZFHX3	463			X
ZPBP2	124626			X

## Sheet: ST_2
Supplementary Table 2. Cancer driver genes according to intOGen and the Cancer Gene Census
GENE SYMBOL	GENE ID
A1CF	29974
ABCB1	5243
ABI1	10006
ABL1	25
ABL2	27
ACKR3	57007
ACSL3	2181
ACSL6	23305
ACVR1	90
ACVR2A	92
ADGRB1	575
AFDN	4301
AFF1	4299
AFF3	3899
AFF4	27125
AJUBA	84962
AKAP9	10142
AKT1	207
AKT2	208
AKT3	10000
ALB	213
ALDH2	217
ALK	238
AMER1	139285
ANK1	286
APC	324
APOBEC3B	9582
AR	367
ARAF	369
ARHGAP26	23092
ARHGAP35	2909
ARHGAP5	394
ARHGEF10	9639
ARHGEF10L	55160
ARHGEF12	23365
ARID1A	8289
ARID1B	57492
ARID2	196528
ARNT	405
ASPSCR1	79058
ASXL1	171023
ASXL2	55252
ATF1	466
ATF7IP	55729
ATG7	10533
ATIC	471
ATM	472
ATP1A1	476
ATP2B3	492
ATR	545
ATRX	546
AXIN1	8312
AXIN2	8313
B2M	567
BAP1	8314
BARD1	580
BAX	581
BAZ1A	11177
BCL10	8915
BCL11A	53335
BCL11B	64919
BCL2	596
BCL2L12	83596
BCL3	602
BCL6	604
BCL7A	605
BCL9	607
BCL9L	283149
BCLAF1	9774
BCOR	54880
BCORL1	63035
BCR	613
BIRC3	330
BIRC6	57448
BLM	641
BMP5	653
BMPR1A	657
BMPR2	659
BRAF	673
BRCA1	672
BRCA2	675
BRD3	8019
BRD4	23476
BRD7	29117
BRIP1	83990
BTG1	694
BTK	695
BUB1B	701
C15orf65	145788
CACNA1D	776
CALR	811
CAMTA1	23261
CANT1	124583
CARD11	84433
CARS	833
CASP3	836
CASP8	841
CASP9	842
CASZ1	54897
CBFA2T3	863
CBFB	865
CBL	867
CBLB	868
CBLC	23624
CCDC6	8030
CCNB1IP1	57820
CCNC	892
CCND1	595
CCND2	894
CCND3	896
CCNE1	898
CCR4	1233
CCR7	1236
CD209	30835
CD274	29126
CD28	940
CD58	965
CD74	972
CD79A	973
CD79B	974
CDC73	79577
CDH1	999
CDH10	1008
CDH11	1009
CDH17	1015
CDK12	51755
CDK4	1019
CDK6	1021
CDKN1A	1026
CDKN1B	1027
CDKN2A	1029
CDKN2C	1031
CDX2	1045
CEBPA	1050
CEP89	84902
CHCHD7	79145
CHD2	1106
CHD4	1108
CHEK2	11200
CHIC2	26511
CHST11	50515
CIC	23152
CIITA	4261
CLIP1	6249
CLP1	10978
CLTC	1213
CLTCL1	8218
CMTR2	55783
CNBD1	168975
CNBP	7555
CNOT3	4849
CNOT9	9125
CNTNAP2	26047
CNTRL	11064
COL1A1	1277
COL2A1	1280
COL3A1	1281
COX6C	1345
CPEB3	22849
CR1	1378
CREB1	1385
CREB3L1	90993
CREB3L2	64764
CREBBP	1387
CRLF2	64109
CRNKL1	51340
CRTC1	23373
CRTC3	64784
CSF1R	1436
CSF3R	1441
CSMD3	114788
CTCF	10664
CTNNA2	1496
CTNNB1	1499
CTNND1	1500
CTNND2	1501
CUL3	8452
CUX1	1523
CXCR4	7852
CYLD	1540
CYP2C8	1558
CYSLTR2	57105
DAXX	1616
DAZAP1	26528
DCAF12L2	340578
DCC	1630
DCSTAMP	81501
DCTN1	1639
DDB2	1643
DDIT3	1649
DDR2	4921
DDX10	1662
DDX3X	1654
DDX5	1655
DDX6	1656
DEK	7913
DGCR8	54487
DHX9	1660
DICER1	23405
DIS3	22894
DNAJB1	3337
DNM2	1785
DNMT3A	1788
DOT1L	84444
DROSHA	29102
DTX1	1840
DUSP16	80824
DUX4L1	22947
EBF1	1879
ECT2L	345930
EED	8726
EFTUD2	9343
EGFR	1956
EGR2	1959
EHD2	30846
EIF1AX	1964
EIF3E	3646
EIF4A2	1974
ELF3	1999
ELF4	2000
ELK4	2005
ELL	8178
ELN	2006
EML4	27436
ENPEP	2028
EP300	2033
EPAS1	2034
EPHA2	1969
EPHA3	2042
EPHA7	2045
EPS15	2060
ERBB2	2064
ERBB3	2065
ERBB4	2066
ERC1	23085
ERCC2	2068
ERCC3	2071
ERCC4	2072
ERCC5	2073
ERG	2078
ESR1	2099
ESRRA	2101
ETNK1	55500
ETV1	2115
ETV4	2118
ETV5	2119
ETV6	2120
EWSR1	2130
EXT1	2131
EXT2	2132
EZH2	2146
EZR	7430
FAM131B	9715
FAM135B	51059
FAM174B	400451
FAM186A	121006
FAM47C	442444
FANCA	2175
FANCC	2176
FANCD2	2177
FANCE	2178
FANCF	2188
FANCG	2189
FAS	355
FAT1	2195
FAT2	2196
FAT3	120114
FAT4	79633
FBLN1	2192
FBLN2	2199
FBN2	2201
FBXO11	80204
FBXW7	55294
FCGR2B	2213
FCRL4	83417
FEN1	2237
FES	2242
FEV	54738
FGD5	152273
FGFR1	2260
FGFR1OP	-
FGFR2	2263
FGFR3	2261
FGFR4	2264
FH	2271
FHIT	2272
FIP1L1	81608
FKBP9	11328
FLCN	201163
FLI1	2313
FLNA	2316
FLT3	2322
FLT4	2324
FN1	2335
FNBP1	23048
FOXA1	3169
FOXA2	3170
FOXD4L1	200350
FOXL2	668
FOXO1	2308
FOXO3	2309
FOXO4	4303
FOXP1	27086
FOXR1	283150
FSTL3	10272
FUBP1	8880
FUS	2521
GAS7	8522
GATA1	2623
GATA2	2624
GATA3	2625
GLI1	2735
GMPS	8833
GNA11	2767
GNA13	10672
GNAI2	2771
GNAQ	2776
GNAS	2778
GOLGA5	9950
GOPC	57120
GPC3	2719
GPC5	2262
GPHN	10243
GRIN2A	2903
GRM3	2913
GTF2I	2969
H3F3A	-
H3F3B	3020; 3021
HERC2	8924
HERPUD1	9709
HEY1	23462
HGF	3082
HIF1A	3091
HIP1	3092
HIST1H3B	-
HIST1H4I	-
HLA-A	3105
HLA-B	3106
HLF	3131
HMGA1	3159
HMGA2	8091
HMGN2P46	283651
HNF1A	6927
HNRNPA2B1	3181
HOOK3	84376
HOXA11	3207
HOXA13	3209
HOXA9	3205
HOXC11	3227
HOXC13	3229
HOXD11	3237
HOXD13	3239
HRAS	3265
HSP90AA1	3320
HSP90AB1	3326
HSPG2	3339
HTRA2	27429
ID3	3399
IDH1	3417
IDH2	3418
IFNAR1	3454
IFNGR1	3459
IGF2BP2	10644
IGH	3492
IGK	50802
IGL	3535
IKBKB	3551
IKZF1	10320
IKZF3	22806
IL2	3558
IL21R	50615
IL6ST	3572
IL7R	3575
ING1	3621
INO80	54617
IRAK1	3654
IRF1	3659
IRF4	3662
IRS4	8471
ISX	91464
ITGAV	3685
ITK	3702
JAK1	3716
JAK2	3717
JAK3	3718
JAZF1	221895
JUN	3725
KAT6A	7994
KAT6B	23522
KAT7	11143
KCNJ5	3762
KDM3B	51780
KDM5A	5927
KDM5C	8242
KDM6A	7403
KDR	3791
KDSR	2531
KEAP1	9817
KEL	3792
KIAA1549	57670
KIF5B	3799
KIFC1	3833
KIT	3815
KLF4	9314
KLF5	688
KLF6	1316
KLHL36	79786
KLHL6	89857
KLK2	3817
KMT2A	4297
KMT2B	9757
KMT2C	58508
KMT2D	8085
KNL1	57082
KNSTRN	90417
KRAS	3845
KTN1	3895
LARP4B	23185
LASP1	3927
LATS1	9113
LATS2	26524
LCK	3932
LCP1	3936
LDB1	8861
LEF1	51176
LEPROTL1	23484
LHFPL6	10186
LIFR	3977
LMNA	4000
LMO1	4004
LMO2	4005
LOX	4015
LPAR4	2846
LPP	4026
LRIG3	121227
LRP1B	53353
LSM14A	26065
LTB	4050
LY75-CD302	100526664
LYL1	4066
LZTR1	8216
MACC1	346389
MAF	4094
MAFB	9935
MALAT1	378938
MALT1	10892
MAML2	84441
MAP2	4133
MAP2K1	5604
MAP2K2	5605
MAP2K4	6416
MAP2K7	5609
MAP3K1	4214
MAP3K13	9175
MAPK1	5594
MARK2	2011
MAX	4149
MB21D2	151963
MCM3AP	8888
MDM2	4193
MDM4	4194
MDS2	259283
MECOM	2122
MED12	9968
MEF2B	100271849
MEN1	4221
MET	4233
MGA	23269
MGMT	4255
MITF	4286
MLF1	4291
MLH1	4292
MLLT1	4298
MLLT10	8028
MLLT11	10962
MLLT3	4300
MLLT6	4302
MN1	4330
MNX1	3110
MPL	4352
MRTFA	57591
MSH2	4436
MSH6	2956
MSI2	124540
MSN	4478
MTCP1	4515
MTOR	2475
MUC1	4582
MUC16	94025
MUC4	4585
MUTYH	4595
MYB	4602
MYC	4609
MYCL	4610
MYCN	4613
MYD88	4615
MYH11	4629
MYH9	4627
MYO5A	4644
MYOD1	4654
N4BP2	55728
NAB2	4665
NACA	4666
NBEA	26960
NBN	4683
NCKIPSD	51517
NCOA1	8648
NCOA2	10499
NCOA4	8031
NCOR1	9611
NCOR2	9612
NDRG1	10397
NEFH	4744
NF1	4763
NF2	4771
NFATC2	4773
NFE2L2	4780
NFIB	4781
NFKB2	4791
NFKBIA	4792
NFKBIE	4794
NIN	51199
NIPBL	25836
NKTR	4820
NKX2-1	7080
NONO	4841
NOTCH1	4851
NOTCH2	4853
NPEPPS	9520
NPM1	4869
NPRL2	10641
NR4A3	8013
NRAS	4893
NRG1	3084
NRK	203447
NRP1	8829
NSD1	64324
NSD2	7468
NSD3	54904
NT5C2	22978
NT5C3A	51251
NTHL1	4913
NTRK1	4914
NTRK3	4916
NUMA1	4926
NUP214	8021
NUP98	4928
NUTM1	256646
NUTM2B	729262
NUTM2D	728130
NXF1	10482
OLIG2	10215
OMD	4958
P2RY8	286530
PABPC1	26986
PAFAH1B2	5049
PAK2	5062
PALB2	79728
PARP4	143
PATZ1	23598
PAX3	5077
PAX5	5079
PAX7	5081
PAX8	7849
PBRM1	55193
PBX1	5087
PCBP1	5093
PCDH17	27253
PCM1	5108
PCMTD1	115294
PDCD1LG2	80380
PDE4DIP	9659
PDGFB	5155
PDGFRA	5156
PDGFRB	5159
PDPR	55066
PEG3	5178
PER1	5187
PHF6	84295
PHOX2B	8929
PICALM	8301
PIK3CA	5290
PIK3CB	5291
PIK3R1	5295
PIM1	5292
PLAG1	5324
PLCB4	5332
PLCG1	5335
PML	5371
PMS1	5378
PMS2	5395
POLD1	5424
POLE	5426
POLG	5428
POLQ	10721
POT1	25913
POU2AF1	5450
POU2F2	5452
POU5F1	5460
PPARG	5468
PPFIBP1	8496
PPM1D	8493
PPP2R1A	5518
PPP3CA	5530
PPP6C	5537
PPT2	9374
PRCC	5546
PRDM1	639
PRDM16	63976
PRDM2	7799
PREX2	80243
PRF1	5551
PRKACA	5566
PRKAR1A	5573
PRKCB	5579
PRKCD	5580
PRKD2	25865
PRPF40B	25766
PRR14	78994
PRRX1	5396
PSIP1	11168
PTCH1	5727
PTEN	5728
PTK6	5753
PTMA	5757
PTPN11	5781
PTPN13	5783
PTPN14	5784
PTPN6	5777
PTPRB	5787
PTPRC	5788
PTPRD	5789
PTPRK	5796
PTPRT	11122
PWWP2A	114825
QKI	9444
RABEP1	9135
RAC1	5879
RAD17	5884
RAD21	5885
RAD51B	5890
RAF1	5894
RALGDS	5900
RANBP2	5903
RAP1GDS1	5910
RARA	5914
RASA1	5921
RASA2	5922
RB1	5925
RBFOX1	54715
RBFOX2	23543
RBM10	8241
RBM15	64783
RBM38	55544
RBM39	9584
RECQL4	9401
REL	5966
RELA	5970
RET	5979
RFWD3	55159
RGL3	57139
RGPD3	653489
RGS7	6000
RHOA	387
RHOH	399
RHPN2	85415
RIPK1	8737
RMI2	116028
RNF213	57674
RNF43	54894
RNF6	6049
ROBO2	6092
ROS1	6098
RPL10	6134
RPL22	6146
RPL5	6125
RPN1	6184
RPS3A	6189
RPS6KA3	6197
RRAGC	64121
RRAS2	22800
RSPH10B2	728194
RSPO2	340419
RSPO3	84870
RUNX1	861
RUNX1T1	862
RXRA	6256
S100A7	6278
SALL4	57167
SATB1	6304
SBDS	51119
SDC4	6385
SDHA	6389
SDHAF2	54949
SDHB	6390
SDHC	6391
SDHD	6392
SEPTIN5	5413
SEPTIN6	23157
SEPTIN9	10801
SET	6418
SETBP1	26040
SETD1B	23067
SETD2	29072
SETDB1	9869
SF3B1	23451
SFMBT2	57713
SFPQ	6421
SFRP4	6424
SGK1	6446
SH2B3	10019
SH3GL1	6455
SHTN1	57698
SIN3A	25942
SIRPA	140885
SIX1	6495
SIX2	10736
SKI	6497
SLC34A2	10568
SLC45A3	85414
SMAD2	4087
SMAD3	4088
SMAD4	4089
SMARCA1	6594
SMARCA4	6597
SMARCB1	6598
SMARCD1	6602
SMARCE1	6605
SMC1A	8243
SMO	6608
SND1	27044
SNX29	92017
SOCS1	8651
SOHLH2	54937
SOS1	6654
SOX17	64321
SOX2	6657
SOX21	11166
SOX9	6662
SP140	11262
SPECC1	92521
SPEN	23013
SPOP	8405
SRC	6714
SRGAP3	9901
SRSF2	6427
SRSF3	6428
SS18	6760
SS18L1	26039
SSX1	6756
SSX2	6757
SSX4	6759
STAG1	10274
STAG2	10735
STAT3	6774
STAT5B	6777
STAT6	6778
STIL	6491
STK11	6794
STRN	6801
SUFU	51684
SUSD2	56241
SUZ12	23512
SYK	6850
TAF15	8148
TAL1	6886
TAL2	6887
TBL1XR1	79718
TBX3	6926
TCEA1	6917
TCF12	6938
TCF3	6929
TCF4	6925
TCF7L2	6934
TCIRG1	10312
TCL1A	8115
TENT5C	54855
TERT	7015
TET1	80312
TET2	54790
TFAP4	7023
TFE3	7030
TFEB	7942
TFG	10342
TFPT	29844
TFRC	7037
TGFBR2	7048
TGIF1	7050
THRAP3	9967
TLL1	7092
TLX1	3195
TLX3	30012
TMEM127	55654
TMPRSS2	7113
TNC	3371
TNFAIP3	7128
TNFRSF14	8764
TNFRSF17	608
TOP1	7150
TOP2A	7153
TP53	7157
TP63	8626
TPM3	7170
TPM4	7171
TPR	7175
TRA	6955
TRAF3	7187
TRAF7	84231
TRB	6957
TRD	6964
TRIM24	8805
TRIM27	5987
TRIM33	51592
TRIM49C	642612
TRIP11	9321
TRRAP	8295
TSC1	7248
TSC2	7249
TSHR	7253
U2AF1	7307
U2AF2	11338
UBE2A	7319
UBE2D2	7322
UBR5	51366
UGT2B17	7367
USP44	84101
USP6	9098
USP8	9101
USP9X	8239
VAV1	7409
VHL	7428
VTI1A	143187
WAS	7454
WDCP	80304
WDR45	11152
WIF1	11197
WNK2	65268
WNK4	65266
WRN	7486
WT1	7490
WWTR1	25937
XPA	7507
XPC	7508
XPO1	7514
YWHAE	7531
ZBTB16	7704
ZBTB20	26137
ZBTB7B	51043
ZCCHC8	55596
ZCRB1	85437
ZEB1	6935
ZFHX3	463
ZFP36L1	677
ZFX	7543
ZMYM2	7750
ZMYM3	9203
ZNF148	7707
ZNF165	7718
ZNF208	7757
ZNF331	55422
ZNF384	171017
ZNF429	353088
ZNF479	90827
ZNF521	25925
ZNF626	199777
ZNF680	340252
ZNF721	170960
ZNF780A	284323
ZNF814	730051
ZNF93	81931
ZNRF3	84133
ZRSR2	8233
ZXDB	158586

## Sheet: ST_3
Supplementary Table 3. OncoPrint of genomic and transcriptomic alterations in 206 circadian rhythm genes of 10,918 individuals with 32 TCGA PanCancer types
Gene	CNV: AMPLIFICATION	CNV: DEEP DELETION	mRNA HIGH	mRNA LOW	FUSION GENE	MUTATION	Total	Ranking	CR-cancer score
DRD3	0.0108994	0.00119069	0.00348049	0.44706	9.15919e-05	0	0.462722	1	1
TP53	0.00146547	0.011449	0.00696098	0.043323	0.0021982	0.349515	0.414911	2	0.99359
PTEN	0.00174025	0.0426818	0.00888441	0.0349881	0.00164865	0.0723576	0.162301	3	0.987179
NPS	0.00366367	0.00439641	0.000549551	0.149753	0.000183184	0	0.158546	4	0.980769
GHRH	0.0120901	0.000549551	0.00751053	0.121726	0.000183184	0	0.142059	5	0.974359
OPN5	0.0110826	0.00100751	0.0125481	0.114398	9.15919e-05	0	0.139128	6	0.967949
ZPBP2	0.0257373	0.00164865	0.011449	0.087745	0.000183184	0	0.126763	7	0.961538
SOX14	0.015479	0.000549551	0.00540392	0.104232	0	0	0.125664	8	0.955128
AANAT	0.0156622	0.000732735	0.02647	0.0689687	9.15919e-05	0	0.111925	9	0.948718
CSF2	0.00457959	0.00302253	0.0242718	0.0799597	0	0	0.111834	10	0.942308
GHRHR	0.00860964	0.000732735	0.0119069	0.0816999	9.15919e-05	0	0.103041	11	0.935897
NLGN1	0.0582524	0.00155706	0.0231727	0.0166697	0.000915919	0	0.100568	12	0.929487
FBXL6	0.0551383	0.0021982	0.0240887	0.0165781	9.15919e-05	0	0.0980949	13	0.923077
HCRTR2	0.0101667	0.00128229	0.0157538	0.0695182	0	0	0.096721	14	0.916667
FBXW7	0.00412163	0.00586188	0.0278439	0.0198754	0.000732735	0.0324235	0.0908591	15	0.910256
KLF10	0.0434145	0.000549551	0.0182268	0.0261953	0.000274776	0	0.0886609	16	0.903846
CIART	0.037919	9.15919e-05	0.0121817	0.0309581	0	0	0.0811504	17	0.897436
PIWIL2	0.00155706	0.0280271	0.0369115	0.0115406	0.000366367	0	0.0784026	18	0.891026
CORT	0.00467119	0.00476278	0.0260121	0.0422239	0.000183184	0	0.0778531	19	0.884615
RORC	0.0368199	0.000183184	0.010991	0.0290346	0.000183184	0	0.0772119	20	0.878205
NCOA2	0.0277523	0.000549551	0.00302253	0.04488	0.000915919	0	0.0771204	21	0.871795
PRKAA1	0.0250962	0.000274776	0.0192343	0.0293094	0.000183184	0	0.0740978	22	0.865385
MTNR1B	0.00650302	0.00293094	0.00668621	0.0575197	0	0	0.0736399	23	0.858974
NR0B2	0.00164865	0.00384686	0.0239971	0.0440557	9.15919e-05	0	0.0736399	23	0.858974
HNRNPU	0.0261953	0.00155706	0.0176772	0.0277523	9.15919e-05	0	0.0732735	24	0.852564
CHRNB2	0.0316908	0.000274776	0.029401	0.0108078	0	0	0.0721744	25	0.846154
CCAR2	0.000915919	0.0284851	0.0172193	0.0246382	0.000457959	0	0.0717164	26	0.839744
MTNR1A	0.00247298	0.0191427	0.0200586	0.0295842	0	0	0.0712585	27	0.833333
PRKDC	0.0221652	0.00210661	0.017494	0.0279355	0.00137388	0	0.0710753	28	0.826923
ZFHX3	0.00274776	0.0101667	0.0164865	0.0266532	0.00119069	0.0137388	0.0709837	29	0.820513
SIAH2	0.0272028	0.000824327	0.0285767	0.0135556	0.000183184	0	0.0703426	30	0.814103
CYP7B1	0.0235391	0.000915919	0.0119069	0.0317824	0.000183184	0	0.0683275	31	0.807692
PTGER4	0.0251878	0.000274776	0.0180436	0.0247298	0	0	0.0682359	32	0.801282
KMT2A	0.00631984	0.00540392	0.0123649	0.0297674	0.00128229	0.0128229	0.0679612	33	0.794872
KDM2A	0.0198754	0.000274776	0.0200586	0.0250046	0.00256457	0	0.067778	34	0.788462
OPRL1	0.0238139	0.000915919	0.0214325	0.0212493	9.15919e-05	0	0.0675032	35	0.782051
EP300	0.00357208	0.00283935	0.00723576	0.0350797	0.0010991	0.017494	0.06732	36	0.775641
KDM5A	0.0206998	0.00201502	0.0201502	0.0236307	0.000732735	9.15919e-05	0.06732	36	0.775641
ID1	0.0236307	0	0.0182268	0.0250046	0.000183184	0	0.0670452	37	0.769231
NCOR1	0.00503755	0.00705257	0.0102583	0.0330647	0.0010991	0.0104415	0.0669537	38	0.762821
BHLHE41	0.0214325	0.0010991	0.0140136	0.0295842	0.000366367	0	0.0664957	39	0.75641
KDM5B	0.0205166	0.000366367	0.0163034	0.0280271	0.000732735	0	0.0659461	40	0.75
CSNK1D	0.0165781	0.00274776	0.0229896	0.0227148	0.000732735	0	0.065763	41	0.74359
PPP1CA	0.0205166	0.000274776	0.0330647	0.0113574	0.000274776	0	0.0654882	42	0.737179
ARNTL2	0.0185931	0.00119069	0.0149295	0.028943	0.000549551	0	0.0642059	43	0.730769
NR1D1	0.0206082	0.00174025	0.0209745	0.0206082	0.000274776	0	0.0642059	43	0.730769
ADORA1	0.0211577	0.000274776	0.0212493	0.0212493	0	0	0.0639311	44	0.724359
DDX5	0.0161202	0.000183184	0.0215241	0.0254625	0.000549551	0	0.0638395	45	0.717949
TOP2A	0.0157538	0.00201502	0.0148379	0.0305001	0.000549551	0	0.0636563	46	0.711538
DHX9	0.0206082	0.000366367	0.0121817	0.0296758	0.000457959	0	0.06329	47	0.705128
AHCY	0.0169445	0.000549551	0.0302253	0.0142883	0.000549551	0	0.0625572	48	0.698718
NDUFA9	0.0163034	0.00137388	0.0302253	0.0144715	0.000183184	0	0.0625572	48	0.698718
EZH2	0.0104415	0.00366367	0.0185931	0.0261037	0.000274776	0.00302253	0.0620993	49	0.692308
MTOR	0.00494596	0.00430482	0.0163949	0.0280271	0.00119069	0.00696098	0.0618245	50	0.685897
GPR157	0.00494596	0.00595347	0.0182268	0.0324235	9.15919e-05	0	0.0616413	51	0.679487
SLC25A19	0.0167613	0.000641143	0.0253709	0.0186847	0.000183184	0	0.0616413	51	0.679487
KDM5C	0.00586188	0.00476278	0.01841	0.0253709	0.000274776	0.00631984	0.0610002	52	0.673077
ID4	0.0167613	0.00119069	0.0158454	0.0270196	0	0	0.060817	53	0.666667
AHR	0.0138304	0.00137388	0.0149295	0.0297674	0.000366367	0	0.0602674	54	0.660256
RBM4B	0.0151127	0.000274776	0.0228064	0.0217989	0.000274776	0	0.0602674	54	0.660256
PRKG1	0.00476278	0.00906759	0.0122733	0.0337058	0.000366367	0	0.0601759	55	0.653846
TOP1	0.0112658	0.000915919	0.0151127	0.0284851	0.00128229	0.00311412	0.0601759	55	0.653846
ADA	0.0145631	0.000457959	0.017952	0.0270196	9.15919e-05	0	0.0600843	56	0.647436
SPSB4	0.0172193	0.000824327	0.0291262	0.0125481	0.000366367	0	0.0600843	56	0.647436
ATG7	0.00714417	0.00686939	0.0237223	0.0209745	0.000824327	0	0.0595347	57	0.641026
PROX1	0.017952	0.00146547	0.0241803	0.0156622	9.15919e-05	0	0.0593515	58	0.634615
FBXW11	0.00860964	0.00302253	0.0146547	0.0321487	0.000457959	0	0.0588936	59	0.628205
NMU	0.0111742	0.000641143	0.0161202	0.0303169	0.000549551	0	0.058802	60	0.621795
RBM4	0.0150211	0.000274776	0.0283935	0.0141967	0.000366367	0	0.0582524	61	0.615385
PHLPP1	0.00357208	0.00998351	0.0187763	0.0254625	0.000274776	0	0.0580692	62	0.608974
MAPK9	0.0104415	0.00283935	0.021982	0.02244	0.000274776	0	0.0579777	63	0.602564
TNFRSF11A	0.00293094	0.0100751	0.01841	0.0262869	0.000183184	0	0.0578861	64	0.596154
FBXL3	0.00476278	0.00595347	0.0131892	0.0335226	0.000274776	0	0.0577029	65	0.589744
BTBD9	0.0113574	0.000915919	0.0183184	0.0256457	0.00100751	0	0.0572449	66	0.583333
RELB	0.00851804	0.00183184	0.0231727	0.0230812	0.000366367	0	0.0569701	67	0.576923
GHRL	0.00778531	0.00283935	0.0305001	0.015479	0.000183184	0	0.056787	68	0.570513
GPR176	0.00100751	0.00696098	0.0142883	0.0344385	9.15919e-05	0	0.056787	68	0.570513
DRD4	0.00210661	0.00686939	0.0297674	0.017952	0	0	0.0566954	69	0.564103
NRIP1	0.00613666	0.00778531	0.0132808	0.0284851	0.00100751	0	0.0566954	69	0.564103
PPARA	0.00265616	0.00943396	0.0172193	0.0266532	0.000549551	0	0.0565122	70	0.557692
NAMPT	0.0105331	0.000824327	0.0303169	0.0146547	9.15919e-05	0	0.0564206	71	0.551282
PER2	0.00256457	0.0103499	0.0180436	0.0251878	0.000183184	0	0.056329	72	0.544872
FBXL12	0.010991	0.00146547	0.0237223	0.019967	9.15919e-05	0	0.0562374	73	0.538462
DYRK1A	0.00485437	0.00384686	0.0168529	0.0291262	0.00137388	0	0.0560542	74	0.532051
USP7	0.0100751	0.000732735	0.0203334	0.0246382	0.000274776	0	0.0560542	74	0.532051
GSK3B	0.0101667	0.00128229	0.0152958	0.0277523	0.00137388	9.15919e-05	0.0559626	75	0.525641
ATOH7	0.00302253	0.00146547	0.0312328	0.0201502	0	0	0.055871	76	0.519231
RAI1	0.0055871	0.00540392	0.0128229	0.0308665	0.00119069	0	0.055871	76	0.519231
UBE3A	0.00393845	0.00760212	0.0146547	0.0292178	0.000366367	0	0.0557794	77	0.512821
CASP1	0.00549551	0.00650302	0.0127313	0.0308665	9.15919e-05	0	0.0556879	78	0.50641
ID2	0.00641143	0.00100751	0.020425	0.0276607	0	0	0.0555047	79	0.5
PSPC1	0.00659461	0.00595347	0.0190511	0.0234475	0.000457959	0	0.0555047	79	0.5
HTR7	0.000915919	0.00403004	0.0203334	0.0299505	0.000183184	0	0.0554131	80	0.49359
NR2F6	0.0106247	0.00119069	0.02647	0.0166697	0.000457959	0	0.0554131	80	0.49359
BHLHE40	0.00641143	0.00503755	0.0166697	0.0268364	0.000183184	0	0.0551383	81	0.487179
DPYD	0.00421323	0.00503755	0.00989192	0.0351713	0.000824327	0	0.0551383	81	0.487179
KCNMA1	0.0103499	0.00311412	0.017952	0.02244	0.00128229	0	0.0551383	81	0.487179
ROCK2	0.00650302	0.00128229	0.00622825	0.0403004	0.000824327	0	0.0551383	81	0.487179
HUWE1	0.00778531	0.00430482	0.0152042	0.027386	0.000366367	0	0.0550467	82	0.480769
IL6	0.011449	0.00119069	0.0311412	0.010991	0	0	0.0547719	83	0.474359
SLC6A4	0.00751053	0.00128229	0.0357208	0.00989192	0.000366367	0	0.0547719	83	0.474359
PRMT5	0.00751053	0.00183184	0.0192343	0.0261037	0	0	0.0546803	84	0.467949
CRTC1	0.00952555	0.0010991	0.0212493	0.0221652	0.000457959	0	0.0544972	85	0.461538
FBXL17	0.00274776	0.00870123	0.0135556	0.029401	9.15919e-05	0	0.0544972	85	0.461538
MTA1	0.00769372	0.00412163	0.0212493	0.0212493	9.15919e-05	0	0.0544056	86	0.455128
MYCBP2	0.00503755	0.00622825	0.0117238	0.0305917	0.000824327	0	0.0544056	86	0.455128
PPARG	0.00952555	0.0022898	0.0162118	0.0248214	0.00119069	0.000183184	0.0542224	87	0.448718
HDAC3	0.00540392	0.00146547	0.0233559	0.0239055	0	0	0.0541308	88	0.442308
CLOCK	0.011449	0.00100751	0.00741894	0.0335226	0.000549551	0	0.0539476	89	0.435897
HDAC2	0.00247298	0.00842645	0.0223484	0.0203334	0.000183184	0	0.0537644	90	0.429487
NAGLU	0.004488	0.00201502	0.0261037	0.0210661	9.15919e-05	0	0.0537644	90	0.429487
MAGED1	0.0056787	0.00531233	0.0175856	0.024913	9.15919e-05	0	0.0535812	91	0.423077
PTGDS	0.00915919	0.00311412	0.0166697	0.0242718	0.000366367	0	0.0535812	91	0.423077
PDE6B	0.00659461	0.00549551	0.0161202	0.0252794	0	0	0.0534897	92	0.416667
SUV39H1	0.00760212	0.00467119	0.0238139	0.0170361	9.15919e-05	0	0.0532149	93	0.410256
NGFR	0.0103499	0.000732735	0.0194175	0.0221652	0.000274776	0	0.0529401	94	0.403846
PMCH	0.00293094	0.000824327	0.0292178	0.0196923	0.000183184	0	0.0528485	95	0.397436
USP9X	0.0033889	0.00631984	0.0150211	0.0272944	0.000824327	0	0.0528485	95	0.397436
PER3	0.00485437	0.00686939	0.00888441	0.0317824	0.000366367	0	0.0527569	96	0.391026
PROKR2	0.00622825	0.00100751	0.0116322	0.033889	0	0	0.0527569	96	0.391026
SUV39H2	0.00732735	0.00164865	0.0245466	0.0192343	0	0	0.0527569	96	0.391026
CRY2	0.00622825	0.00164865	0.0188679	0.0258289	9.15919e-05	0	0.0526653	97	0.384615
KCND2	0.00906759	0.00137388	0.0221652	0.0200586	0	0	0.0526653	97	0.384615
LEPR	0.00476278	0.00247298	0.0237223	0.0214325	0.000274776	0	0.0526653	97	0.384615
PPP1CB	0.00622825	0.000366367	0.0251878	0.0205166	0.000274776	0	0.0525737	98	0.378205
KDM8	0.00686939	0.000549551	0.0202418	0.0245466	0	0	0.0522074	99	0.371795
CDK1	0.00631984	0.00183184	0.0140136	0.0296758	0.000274776	0	0.0521158	100	0.365385
PML	0.00467119	0.00119069	0.0236307	0.0209745	0.00155706	0	0.0520242	101	0.358974
THRAP3	0.00851804	0.000915919	0.0124565	0.0291262	0.00100751	0	0.0520242	101	0.358974
HS3ST2	0.0055871	0.000732735	0.0251878	0.020425	0	0	0.0519326	102	0.352564
USP2	0.00403004	0.0055871	0.0183184	0.0239055	9.15919e-05	0	0.0519326	102	0.352564
CIPC	0.00485437	0.00183184	0.019967	0.024455	0.000274776	0	0.051383	103	0.346154
CREB1	0.00421323	0.00283935	0.0121817	0.0316908	0.000183184	0	0.0511083	104	0.339744
MAPK8	0.00283935	0.00375527	0.00622825	0.037919	0.000366367	0	0.0511083	104	0.339744
IMPDH2	0.0010991	0.00577029	0.0265616	0.0175856	0	0	0.0510167	105	0.333333
PROK2	0.00485437	0.00714417	0.0329731	0.00604506	0	0	0.0510167	105	0.333333
TARDBP	0.00512914	0.00421323	0.021982	0.0195091	9.15919e-05	0	0.0509251	106	0.326923
FBXL22	0.00283935	0.000915919	0.0250962	0.021982	0	0	0.0508335	107	0.320513
ADRB1	0.00210661	0.00283935	0.0312328	0.0145631	0	0	0.0507419	108	0.314103
SIK1	0.00439641	0.00247298	0.0251878	0.0186847	0	0	0.0507419	108	0.314103
CREM	0.00723576	0.000824327	0.0299505	0.0124565	0.000183184	0	0.0506503	109	0.307692
SRRD	0.00384686	0.00174025	0.0258289	0.0190511	0.000183184	0	0.0506503	109	0.307692
DDB1	0.00512914	0.000915919	0.0217073	0.02244	0.000366367	0	0.0505587	110	0.301282
ASS1	0.00430482	0.00238139	0.0163949	0.0272944	9.15919e-05	0	0.0504671	111	0.294872
ALB	0.008976	0.000915919	0.0357208	0.00476278	0	0	0.0503755	112	0.288462
BTRC	0.00155706	0.00320572	0.0169445	0.0283935	0.000274776	0	0.0503755	112	0.288462
SFPQ	0.00494596	0.000824327	0.0247298	0.0190511	0.000824327	0	0.0503755	112	0.288462
OGT	0.00412163	0.00247298	0.0222568	0.0211577	0.000274776	0	0.0502839	113	0.282051
TIMELESS	0.00622825	0.000457959	0.0191427	0.0240887	0.000366367	0	0.0502839	113	0.282051
CSNK1E	0.00512914	0.00146547	0.0213409	0.0213409	0.000824327	0	0.0501008	114	0.275641
LGR4	0.00421323	0.0010991	0.0146547	0.0301337	0	0	0.0501008	114	0.275641
GFPT1	0.00421323	0.000274776	0.0248214	0.0206998	0	0	0.0500092	115	0.269231
SIN3A	0.00494596	0.00174025	0.0158454	0.0268364	0.000641143	0	0.0500092	115	0.269231
NFIL3	0.00311412	0.00155706	0.0225316	0.0225316	0.000183184	0	0.0499176	116	0.262821
FBXL8	0.00329731	0.004488	0.0188679	0.0231727	0	0	0.049826	117	0.25641
PPP1CC	0.00329731	0.00119069	0.0222568	0.0229896	9.15919e-05	0	0.049826	117	0.25641
MYBBP1A	0.00201502	0.0056787	0.0190511	0.0227148	0.000183184	0	0.0496428	118	0.25
NOCT	0.00329731	0.00201502	0.0275692	0.0165781	9.15919e-05	0	0.0495512	119	0.24359
MAT2A	0.00577029	0.000366367	0.0205166	0.0226232	0	0	0.0492764	120	0.237179
ARNTL	0.00439641	0.00183184	0.0153874	0.0272944	0.000274776	0	0.0491848	121	0.230769
PROKR1	0.00357208	0.000457959	0.0170361	0.0281187	0	0	0.0491848	121	0.230769
MAGEL2	0.00412163	0.00696098	0.022898	0.0151127	0	0	0.0490932	122	0.224359
NR1D2	0.00302253	0.00283935	0.0126397	0.0303169	0.000183184	0	0.0490016	123	0.217949
SIRT1	0.0033889	0.00192343	0.0122733	0.0310496	0.000183184	0	0.0488185	124	0.211538
METTL3	0.00705257	0.00146547	0.0185931	0.0212493	0.000183184	0	0.0485437	125	0.205128
SETX	0.00430482	0.00238139	0.0142883	0.0274776	9.15919e-05	0	0.0485437	125	0.205128
ADCY1	0.00723576	0.000824327	0.0241803	0.015937	0.000183184	0	0.0483605	126	0.198718
CRY1	0.00320572	0.00100751	0.0176772	0.0261953	0.000274776	0	0.0483605	126	0.198718
ATF4	0.00320572	0.00183184	0.0233559	0.0197838	9.15919e-05	0	0.0482689	127	0.192308
HNRNPD	0.00192343	0.00265616	0.0212493	0.0220736	0.000366367	0	0.0482689	127	0.192308
PRF1	0.00412163	0.00183184	0.020425	0.0218905	0	0	0.0482689	127	0.192308
DBP	0.00256457	0.00183184	0.0198754	0.0235391	0.000274776	0	0.0480857	128	0.185897
NONO	0.00384686	0.00265616	0.02244	0.0187763	0.000183184	0	0.0479025	129	0.179487
PER1	0.00210661	0.00595347	0.020425	0.0188679	0.000274776	0	0.0476278	130	0.173077
EGR1	0.00586188	0.0010991	0.0196923	0.0197838	9.15919e-05	0.000915919	0.0474446	131	0.166667
NPAS2	0.00467119	0.000366367	0.0102583	0.0316908	0.000457959	0	0.0474446	131	0.166667
RORA	0.00274776	0.00293094	0.0145631	0.0263785	0.000824327	0	0.0474446	131	0.166667
PTGER3	0.00393845	0.00210661	0.0196923	0.0214325	0.000183184	0	0.047353	132	0.160256
MAPK10	0.00274776	0.00421323	0.0144715	0.024913	0.000732735	0	0.0470782	133	0.153846
PRKAA2	0.00641143	0.00137388	0.00860964	0.0305001	0.000183184	0	0.0470782	133	0.153846
PRKG2	0.00265616	0.0022898	0.0192343	0.0227148	9.15919e-05	0	0.0469866	134	0.147436
ID3	0.00302253	0.00283935	0.0190511	0.0215241	0	0.000457959	0.046895	135	0.141026
HDAC1	0.00522074	0.00146547	0.0178604	0.0208829	0.00100751	0.000366367	0.0468034	136	0.134615
CAVIN3	0.00119069	0.00302253	0.020425	0.0220736	0	0	0.0467119	137	0.128205
ANKFN1	0.0122733	0.000641143	0.0225316	0.00998351	0.0010991	0	0.0465287	138	0.121795
DRD1	0.00815168	0.00283935	0.0283019	0.00714417	0	0	0.0464371	139	0.115385
HNF1B	0.0122733	0.0021982	0.0132808	0.0177688	0.000549551	0	0.0460707	140	0.108974
ADORA2A	0.00540392	0.00100751	0.0252794	0.0142883	0	0	0.0459791	141	0.102564
DRD2	0.0022898	0.00714417	0.0315076	0.00403004	9.15919e-05	0	0.0450632	142	0.0961538
HNF4A	0.0147463	0.000549551	0.0182268	0.0110826	0.000457959	0	0.0450632	142	0.0961538
PPARGC1A	0.00201502	0.00265616	0.0177688	0.0222568	0.000183184	0	0.04488	143	0.0897436
UTS2	0.00485437	0.00659461	0.0331563	0	0.000183184	0	0.0447884	144	0.0833333
KCNA2	0.00311412	0.00457959	0.0288514	0.00650302	0	0	0.0430482	145	0.0769231
NKX2-1	0.0131892	0.00100751	0.0155706	0.0124565	0.000183184	0	0.042407	146	0.0705128
RORB	0.00283935	0.00302253	0.0305917	0.0056787	9.15919e-05	0	0.0422239	147	0.0641026
UTS2R	0.0151127	0.00265616	0.0209745	0.00283935	9.15919e-05	0	0.0416743	148	0.0576923
FBXL21P	0.00485437	0.0021982	0.0121817	0.0201502	0	0	0.0393845	149	0.0512821
PROK1	0.00293094	0.00457959	0.0292178	0.00265616	0	0	0.0393845	149	0.0512821
GABRB3	0.00348049	0.00751053	0.0175856	0.00961715	0.000183184	0	0.038377	150	0.0448718
PRKCG	0.00668621	0.00247298	0.0268364	0.00201502	9.15919e-05	0	0.0381022	151	0.0384615
OPN4	0.00247298	0.00531233	0.0274776	0.0021982	0	0	0.0374611	152	0.0320513
SIX3	0.00412163	0.00100751	0.0279355	0.00128229	0	0	0.0343469	153	0.025641
NPY2R	0.00302253	0.004488	0.0163949	0.00888441	0	0	0.0327899	154	0.0192308
CARTPT	0.000915919	0.00650302	0.0156622	0.00485437	9.15919e-05	0	0.0280271	155	0.0128205
MC3R	0.0170361	0.000457959	0.00577029	0.00412163	0	0	0.027386	156	0.00641026
NMS	0.00393845	9.15919e-05	0	0	0	0	0.00403004	157	0

## Sheet: ST_4
Supplementary Table 4. Frequency of alterations belonging to 585 individuals with TCGA-GBM
GENE	TYPE	TOTAL	f	TYPE	TOTAL	f	TYPE	TOTAL	f	TYPE	TOTAL	f	TYPE	TOTAL	f	TYPE	TOTAL	f	TYPE	TOTAL	f
AANAT	All	12	0.0205128	AMPLIFICATION	4	0.00683761	DEEP DELETION	0	0	mRNA HIGH	4	0.00683761	mRNA LOW	4	0.00683761	FUSION	0	0	MISSENSE, INFRAME, TRUNCATING MUTATIONS (PUTATIVE DRIVER)	0	0
ADA	All	4	0.00683761	AMPLIFICATION	0	0	DEEP DELETION	0	0	mRNA HIGH	1	0.0017094	mRNA LOW	3	0.00512821	FUSION	0	0	MISSENSE, INFRAME, TRUNCATING MUTATIONS (PUTATIVE DRIVER)	0	0
ADCY1	All	19	0.0324786	AMPLIFICATION	9	0.0153846	DEEP DELETION	0	0	mRNA HIGH	4	0.00683761	mRNA LOW	6	0.0102564	FUSION	0	0	MISSENSE, INFRAME, TRUNCATING MUTATIONS (PUTATIVE DRIVER)	0	0
ADORA1	All	16	0.0273504	AMPLIFICATION	9	0.0153846	DEEP DELETION	0	0	mRNA HIGH	2	0.0034188	mRNA LOW	5	0.00854701	FUSION	0	0	MISSENSE, INFRAME, TRUNCATING MUTATIONS (PUTATIVE DRIVER)	0	0
ADORA2A	All	8	0.0136752	AMPLIFICATION	0	0	DEEP DELETION	1	0.0017094	mRNA HIGH	2	0.0034188	mRNA LOW	5	0.00854701	FUSION	0	0	MISSENSE, INFRAME, TRUNCATING MUTATIONS (PUTATIVE DRIVER)	0	0
ADRB1	All	9	0.0153846	AMPLIFICATION	0	0	DEEP DELETION	0	0	mRNA HIGH	1	0.0017094	mRNA LOW	8	0.0136752	FUSION	0	0	MISSENSE, INFRAME, TRUNCATING MUTATIONS (PUTATIVE DRIVER)	0	0
AHCY	All	7	0.0119658	AMPLIFICATION	0	0	DEEP DELETION	0	0	mRNA HIGH	7	0.0119658	mRNA LOW	0	0	FUSION	0	0	MISSENSE, INFRAME, TRUNCATING MUTATIONS (PUTATIVE DRIVER)	0	0
AHR	All	13	0.0222222	AMPLIFICATION	4	0.00683761	DEEP DELETION	0	0	mRNA HIGH	1	0.0017094	mRNA LOW	8	0.0136752	FUSION	0	0	MISSENSE, INFRAME, TRUNCATING MUTATIONS (PUTATIVE DRIVER)	0	0
ALB	All	21	0.0358974	AMPLIFICATION	1	0.0017094	DEEP DELETION	0	0	mRNA HIGH	6	0.0102564	mRNA LOW	14	0.0239316	FUSION	0	0	MISSENSE, INFRAME, TRUNCATING MUTATIONS (PUTATIVE DRIVER)	0	0
ANKFN1	All	9	0.0153846	AMPLIFICATION	0	0	DEEP DELETION	0	0	mRNA HIGH	1	0.0017094	mRNA LOW	8	0.0136752	FUSION	0	0	MISSENSE, INFRAME, TRUNCATING MUTATIONS (PUTATIVE DRIVER)	0	0
ARNTL	All	3	0.00512821	AMPLIFICATION	0	0	DEEP DELETION	0	0	mRNA HIGH	0	0	mRNA LOW	3	0.00512821	FUSION	0	0	MISSENSE, INFRAME, TRUNCATING MUTATIONS (PUTATIVE DRIVER)	0	0
ARNTL2	All	17	0.0290598	AMPLIFICATION	9	0.0153846	DEEP DELETION	0	0	mRNA HIGH	3	0.00512821	mRNA LOW	5	0.00854701	FUSION	0	0	MISSENSE, INFRAME, TRUNCATING MUTATIONS (PUTATIVE DRIVER)	0	0
ASS1	All	14	0.0239316	AMPLIFICATION	5	0.00854701	DEEP DELETION	0	0	mRNA HIGH	4	0.00683761	mRNA LOW	5	0.00854701	FUSION	0	0	MISSENSE, INFRAME, TRUNCATING MUTATIONS (PUTATIVE DRIVER)	0	0
ATF4	All	8	0.0136752	AMPLIFICATION	0	0	DEEP DELETION	1	0.0017094	mRNA HIGH	2	0.0034188	mRNA LOW	5	0.00854701	FUSION	0	0	MISSENSE, INFRAME, TRUNCATING MUTATIONS (PUTATIVE DRIVER)	0	0
ATG7	All	10	0.017094	AMPLIFICATION	2	0.0034188	DEEP DELETION	0	0	mRNA HIGH	5	0.00854701	mRNA LOW	3	0.00512821	FUSION	0	0	MISSENSE, INFRAME, TRUNCATING MUTATIONS (PUTATIVE DRIVER)	0	0
ATOH7	All	8	0.0136752	AMPLIFICATION	0	0	DEEP DELETION	0	0	mRNA HIGH	7	0.0119658	mRNA LOW	1	0.0017094	FUSION	0	0	MISSENSE, INFRAME, TRUNCATING MUTATIONS (PUTATIVE DRIVER)	0	0
BHLHE40	All	9	0.0153846	AMPLIFICATION	2	0.0034188	DEEP DELETION	0	0	mRNA HIGH	3	0.00512821	mRNA LOW	4	0.00683761	FUSION	0	0	MISSENSE, INFRAME, TRUNCATING MUTATIONS (PUTATIVE DRIVER)	0	0
BHLHE41	All	13	0.0222222	AMPLIFICATION	7	0.0119658	DEEP DELETION	0	0	mRNA HIGH	2	0.0034188	mRNA LOW	4	0.00683761	FUSION	0	0	MISSENSE, INFRAME, TRUNCATING MUTATIONS (PUTATIVE DRIVER)	0	0
BTBD9	All	12	0.0205128	AMPLIFICATION	2	0.0034188	DEEP DELETION	0	0	mRNA HIGH	2	0.0034188	mRNA LOW	8	0.0136752	FUSION	0	0	MISSENSE, INFRAME, TRUNCATING MUTATIONS (PUTATIVE DRIVER)	0	0
BTRC	All	9	0.0153846	AMPLIFICATION	1	0.0017094	DEEP DELETION	0	0	mRNA HIGH	6	0.0102564	mRNA LOW	2	0.0034188	FUSION	0	0	MISSENSE, INFRAME, TRUNCATING MUTATIONS (PUTATIVE DRIVER)	0	0
CARTPT	All	7	0.0119658	AMPLIFICATION	0	0	DEEP DELETION	0	0	mRNA HIGH	7	0.0119658	mRNA LOW	0	0	FUSION	0	0	MISSENSE, INFRAME, TRUNCATING MUTATIONS (PUTATIVE DRIVER)	0	0
CASP1	All	10	0.017094	AMPLIFICATION	2	0.0034188	DEEP DELETION	0	0	mRNA HIGH	1	0.0017094	mRNA LOW	7	0.0119658	FUSION	0	0	MISSENSE, INFRAME, TRUNCATING MUTATIONS (PUTATIVE DRIVER)	0	0
CAVIN3	All	10	0.017094	AMPLIFICATION	0	0	DEEP DELETION	2	0.0034188	mRNA HIGH	5	0.00854701	mRNA LOW	3	0.00512821	FUSION	0	0	MISSENSE, INFRAME, TRUNCATING MUTATIONS (PUTATIVE DRIVER)	0	0
CCAR2	All	8	0.0136752	AMPLIFICATION	0	0	DEEP DELETION	0	0	mRNA HIGH	2	0.0034188	mRNA LOW	6	0.0102564	FUSION	0	0	MISSENSE, INFRAME, TRUNCATING MUTATIONS (PUTATIVE DRIVER)	0	0
CDK1	All	11	0.0188034	AMPLIFICATION	1	0.0017094	DEEP DELETION	0	0	mRNA HIGH	3	0.00512821	mRNA LOW	7	0.0119658	FUSION	0	0	MISSENSE, INFRAME, TRUNCATING MUTATIONS (PUTATIVE DRIVER)	0	0
CHRNB2	All	9	0.0153846	AMPLIFICATION	2	0.0034188	DEEP DELETION	0	0	mRNA HIGH	2	0.0034188	mRNA LOW	5	0.00854701	FUSION	0	0	MISSENSE, INFRAME, TRUNCATING MUTATIONS (PUTATIVE DRIVER)	0	0
CIART	All	7	0.0119658	AMPLIFICATION	2	0.0034188	DEEP DELETION	0	0	mRNA HIGH	1	0.0017094	mRNA LOW	4	0.00683761	FUSION	0	0	MISSENSE, INFRAME, TRUNCATING MUTATIONS (PUTATIVE DRIVER)	0	0
CIPC	All	10	0.017094	AMPLIFICATION	2	0.0034188	DEEP DELETION	1	0.0017094	mRNA HIGH	1	0.0017094	mRNA LOW	6	0.0102564	FUSION	0	0	MISSENSE, INFRAME, TRUNCATING MUTATIONS (PUTATIVE DRIVER)	0	0
CLOCK	All	35	0.0598291	AMPLIFICATION	30	0.0512821	DEEP DELETION	0	0	mRNA HIGH	3	0.00512821	mRNA LOW	2	0.0034188	FUSION	0	0	MISSENSE, INFRAME, TRUNCATING MUTATIONS (PUTATIVE DRIVER)	0	0
CORT	All	16	0.0273504	AMPLIFICATION	3	0.00512821	DEEP DELETION	0	0	mRNA HIGH	6	0.0102564	mRNA LOW	6	0.0102564	FUSION	1	0.0017094	MISSENSE, INFRAME, TRUNCATING MUTATIONS (PUTATIVE DRIVER)	0	0
CREB1	All	11	0.0188034	AMPLIFICATION	0	0	DEEP DELETION	1	0.0017094	mRNA HIGH	4	0.00683761	mRNA LOW	6	0.0102564	FUSION	0	0	MISSENSE, INFRAME, TRUNCATING MUTATIONS (PUTATIVE DRIVER)	0	0
CREM	All	7	0.0119658	AMPLIFICATION	0	0	DEEP DELETION	0	0	mRNA HIGH	6	0.0102564	mRNA LOW	1	0.0017094	FUSION	0	0	MISSENSE, INFRAME, TRUNCATING MUTATIONS (PUTATIVE DRIVER)	0	0
CRTC1	All	11	0.0188034	AMPLIFICATION	1	0.0017094	DEEP DELETION	0	0	mRNA HIGH	5	0.00854701	mRNA LOW	4	0.00683761	FUSION	1	0.0017094	MISSENSE, INFRAME, TRUNCATING MUTATIONS (PUTATIVE DRIVER)	0	0
CRY1	All	5	0.00854701	AMPLIFICATION	0	0	DEEP DELETION	2	0.0034188	mRNA HIGH	2	0.0034188	mRNA LOW	1	0.0017094	FUSION	0	0	MISSENSE, INFRAME, TRUNCATING MUTATIONS (PUTATIVE DRIVER)	0	0
CRY2	All	10	0.017094	AMPLIFICATION	0	0	DEEP DELETION	4	0.00683761	mRNA HIGH	3	0.00512821	mRNA LOW	3	0.00512821	FUSION	0	0	MISSENSE, INFRAME, TRUNCATING MUTATIONS (PUTATIVE DRIVER)	0	0
CSF2	All	4	0.00683761	AMPLIFICATION	0	0	DEEP DELETION	1	0.0017094	mRNA HIGH	3	0.00512821	mRNA LOW	0	0	FUSION	0	0	MISSENSE, INFRAME, TRUNCATING MUTATIONS (PUTATIVE DRIVER)	0	0
CSNK1D	All	6	0.0102564	AMPLIFICATION	0	0	DEEP DELETION	0	0	mRNA HIGH	2	0.0034188	mRNA LOW	4	0.00683761	FUSION	0	0	MISSENSE, INFRAME, TRUNCATING MUTATIONS (PUTATIVE DRIVER)	0	0
CSNK1E	All	10	0.017094	AMPLIFICATION	1	0.0017094	DEEP DELETION	0	0	mRNA HIGH	4	0.00683761	mRNA LOW	4	0.00683761	FUSION	1	0.0017094	MISSENSE, INFRAME, TRUNCATING MUTATIONS (PUTATIVE DRIVER)	0	0
CYP7B1	All	8	0.0136752	AMPLIFICATION	1	0.0017094	DEEP DELETION	0	0	mRNA HIGH	1	0.0017094	mRNA LOW	6	0.0102564	FUSION	0	0	MISSENSE, INFRAME, TRUNCATING MUTATIONS (PUTATIVE DRIVER)	0	0
DBP	All	6	0.0102564	AMPLIFICATION	0	0	DEEP DELETION	1	0.0017094	mRNA HIGH	2	0.0034188	mRNA LOW	3	0.00512821	FUSION	0	0	MISSENSE, INFRAME, TRUNCATING MUTATIONS (PUTATIVE DRIVER)	0	0
DDB1	All	6	0.0102564	AMPLIFICATION	0	0	DEEP DELETION	0	0	mRNA HIGH	4	0.00683761	mRNA LOW	2	0.0034188	FUSION	0	0	MISSENSE, INFRAME, TRUNCATING MUTATIONS (PUTATIVE DRIVER)	0	0
DDX5	All	12	0.0205128	AMPLIFICATION	1	0.0017094	DEEP DELETION	0	0	mRNA HIGH	4	0.00683761	mRNA LOW	7	0.0119658	FUSION	0	0	MISSENSE, INFRAME, TRUNCATING MUTATIONS (PUTATIVE DRIVER)	0	0
DHX9	All	10	0.017094	AMPLIFICATION	2	0.0034188	DEEP DELETION	0	0	mRNA HIGH	3	0.00512821	mRNA LOW	5	0.00854701	FUSION	0	0	MISSENSE, INFRAME, TRUNCATING MUTATIONS (PUTATIVE DRIVER)	0	0
DPYD	All	7	0.0119658	AMPLIFICATION	0	0	DEEP DELETION	0	0	mRNA HIGH	1	0.0017094	mRNA LOW	6	0.0102564	FUSION	0	0	MISSENSE, INFRAME, TRUNCATING MUTATIONS (PUTATIVE DRIVER)	0	0
DRD1	All	8	0.0136752	AMPLIFICATION	0	0	DEEP DELETION	0	0	mRNA HIGH	8	0.0136752	mRNA LOW	0	0	FUSION	0	0	MISSENSE, INFRAME, TRUNCATING MUTATIONS (PUTATIVE DRIVER)	0	0
DRD2	All	11	0.0188034	AMPLIFICATION	2	0.0034188	DEEP DELETION	0	0	mRNA HIGH	3	0.00512821	mRNA LOW	6	0.0102564	FUSION	0	0	MISSENSE, INFRAME, TRUNCATING MUTATIONS (PUTATIVE DRIVER)	0	0
DRD3	All	6	0.0102564	AMPLIFICATION	3	0.00512821	DEEP DELETION	0	0	mRNA HIGH	3	0.00512821	mRNA LOW	0	0	FUSION	0	0	MISSENSE, INFRAME, TRUNCATING MUTATIONS (PUTATIVE DRIVER)	0	0
DRD4	All	13	0.0222222	AMPLIFICATION	0	0	DEEP DELETION	2	0.0034188	mRNA HIGH	6	0.0102564	mRNA LOW	5	0.00854701	FUSION	0	0	MISSENSE, INFRAME, TRUNCATING MUTATIONS (PUTATIVE DRIVER)	0	0
DYRK1A	All	7	0.0119658	AMPLIFICATION	0	0	DEEP DELETION	0	0	mRNA HIGH	4	0.00683761	mRNA LOW	3	0.00512821	FUSION	0	0	MISSENSE, INFRAME, TRUNCATING MUTATIONS (PUTATIVE DRIVER)	0	0
EGR1	All	10	0.017094	AMPLIFICATION	0	0	DEEP DELETION	0	0	mRNA HIGH	4	0.00683761	mRNA LOW	6	0.0102564	FUSION	0	0	MISSENSE, INFRAME, TRUNCATING MUTATIONS (PUTATIVE DRIVER)	0	0
EP300	All	10	0.017094	AMPLIFICATION	0	0	DEEP DELETION	1	0.0017094	mRNA HIGH	2	0.0034188	mRNA LOW	6	0.0102564	FUSION	0	0	MISSENSE, INFRAME, TRUNCATING MUTATIONS (PUTATIVE DRIVER)	1	0.0017094
EZH2	All	17	0.0290598	AMPLIFICATION	11	0.0188034	DEEP DELETION	0	0	mRNA HIGH	0	0	mRNA LOW	5	0.00854701	FUSION	0	0	MISSENSE, INFRAME, TRUNCATING MUTATIONS (PUTATIVE DRIVER)	1	0.0017094
FBXL3	All	12	0.0205128	AMPLIFICATION	1	0.0017094	DEEP DELETION	2	0.0034188	mRNA HIGH	5	0.00854701	mRNA LOW	4	0.00683761	FUSION	0	0	MISSENSE, INFRAME, TRUNCATING MUTATIONS (PUTATIVE DRIVER)	0	0
FBXL6	All	10	0.017094	AMPLIFICATION	6	0.0102564	DEEP DELETION	0	0	mRNA HIGH	1	0.0017094	mRNA LOW	3	0.00512821	FUSION	0	0	MISSENSE, INFRAME, TRUNCATING MUTATIONS (PUTATIVE DRIVER)	0	0
FBXL8	All	9	0.0153846	AMPLIFICATION	0	0	DEEP DELETION	0	0	mRNA HIGH	2	0.0034188	mRNA LOW	7	0.0119658	FUSION	0	0	MISSENSE, INFRAME, TRUNCATING MUTATIONS (PUTATIVE DRIVER)	0	0
FBXL12	All	15	0.025641	AMPLIFICATION	6	0.0102564	DEEP DELETION	0	0	mRNA HIGH	4	0.00683761	mRNA LOW	5	0.00854701	FUSION	0	0	MISSENSE, INFRAME, TRUNCATING MUTATIONS (PUTATIVE DRIVER)	0	0
FBXL17	All	8	0.0136752	AMPLIFICATION	0	0	DEEP DELETION	1	0.0017094	mRNA HIGH	3	0.00512821	mRNA LOW	4	0.00683761	FUSION	0	0	MISSENSE, INFRAME, TRUNCATING MUTATIONS (PUTATIVE DRIVER)	0	0
FBXL21P	All	2	0.0034188	AMPLIFICATION	0	0	DEEP DELETION	0	0	mRNA HIGH	2	0.0034188	mRNA LOW	0	0	FUSION	0	0	MISSENSE, INFRAME, TRUNCATING MUTATIONS (PUTATIVE DRIVER)	0	0
FBXL22	All	11	0.0188034	AMPLIFICATION	0	0	DEEP DELETION	0	0	mRNA HIGH	6	0.0102564	mRNA LOW	5	0.00854701	FUSION	0	0	MISSENSE, INFRAME, TRUNCATING MUTATIONS (PUTATIVE DRIVER)	0	0
FBXW7	All	14	0.0239316	AMPLIFICATION	1	0.0017094	DEEP DELETION	0	0	mRNA HIGH	9	0.0153846	mRNA LOW	1	0.0017094	FUSION	0	0	MISSENSE, INFRAME, TRUNCATING MUTATIONS (PUTATIVE DRIVER)	3	0.00512821
FBXW11	All	9	0.0153846	AMPLIFICATION	0	0	DEEP DELETION	1	0.0017094	mRNA HIGH	0	0	mRNA LOW	8	0.0136752	FUSION	0	0	MISSENSE, INFRAME, TRUNCATING MUTATIONS (PUTATIVE DRIVER)	0	0
GABRB3	All	5	0.00854701	AMPLIFICATION	1	0.0017094	DEEP DELETION	0	0	mRNA HIGH	0	0	mRNA LOW	4	0.00683761	FUSION	0	0	MISSENSE, INFRAME, TRUNCATING MUTATIONS (PUTATIVE DRIVER)	0	0
GFPT1	All	5	0.00854701	AMPLIFICATION	0	0	DEEP DELETION	0	0	mRNA HIGH	5	0.00854701	mRNA LOW	0	0	FUSION	0	0	MISSENSE, INFRAME, TRUNCATING MUTATIONS (PUTATIVE DRIVER)	0	0
GHRH	All	1	0.0017094	AMPLIFICATION	0	0	DEEP DELETION	0	0	mRNA HIGH	1	0.0017094	mRNA LOW	0	0	FUSION	0	0	MISSENSE, INFRAME, TRUNCATING MUTATIONS (PUTATIVE DRIVER)	0	0
GHRHR	All	10	0.017094	AMPLIFICATION	8	0.0136752	DEEP DELETION	0	0	mRNA HIGH	2	0.0034188	mRNA LOW	0	0	FUSION	0	0	MISSENSE, INFRAME, TRUNCATING MUTATIONS (PUTATIVE DRIVER)	0	0
GHRL	All	12	0.0205128	AMPLIFICATION	4	0.00683761	DEEP DELETION	0	0	mRNA HIGH	3	0.00512821	mRNA LOW	5	0.00854701	FUSION	0	0	MISSENSE, INFRAME, TRUNCATING MUTATIONS (PUTATIVE DRIVER)	0	0
GPR157	All	21	0.0358974	AMPLIFICATION	0	0	DEEP DELETION	7	0.0119658	mRNA HIGH	6	0.0102564	mRNA LOW	8	0.0136752	FUSION	0	0	MISSENSE, INFRAME, TRUNCATING MUTATIONS (PUTATIVE DRIVER)	0	0
GPR176	All	11	0.0188034	AMPLIFICATION	1	0.0017094	DEEP DELETION	2	0.0034188	mRNA HIGH	4	0.00683761	mRNA LOW	4	0.00683761	FUSION	0	0	MISSENSE, INFRAME, TRUNCATING MUTATIONS (PUTATIVE DRIVER)	0	0
GSK3B	All	7	0.0119658	AMPLIFICATION	0	0	DEEP DELETION	0	0	mRNA HIGH	2	0.0034188	mRNA LOW	5	0.00854701	FUSION	0	0	MISSENSE, INFRAME, TRUNCATING MUTATIONS (PUTATIVE DRIVER)	0	0
HCRTR2	All	3	0.00512821	AMPLIFICATION	0	0	DEEP DELETION	1	0.0017094	mRNA HIGH	2	0.0034188	mRNA LOW	0	0	FUSION	0	0	MISSENSE, INFRAME, TRUNCATING MUTATIONS (PUTATIVE DRIVER)	0	0
HDAC1	All	8	0.0136752	AMPLIFICATION	1	0.0017094	DEEP DELETION	0	0	mRNA HIGH	3	0.00512821	mRNA LOW	3	0.00512821	FUSION	1	0.0017094	MISSENSE, INFRAME, TRUNCATING MUTATIONS (PUTATIVE DRIVER)	0	0
HDAC2	All	9	0.0153846	AMPLIFICATION	0	0	DEEP DELETION	1	0.0017094	mRNA HIGH	7	0.0119658	mRNA LOW	1	0.0017094	FUSION	0	0	MISSENSE, INFRAME, TRUNCATING MUTATIONS (PUTATIVE DRIVER)	0	0
HDAC3	All	9	0.0153846	AMPLIFICATION	0	0	DEEP DELETION	0	0	mRNA HIGH	5	0.00854701	mRNA LOW	4	0.00683761	FUSION	0	0	MISSENSE, INFRAME, TRUNCATING MUTATIONS (PUTATIVE DRIVER)	0	0
HNF1B	All	6	0.0102564	AMPLIFICATION	0	0	DEEP DELETION	1	0.0017094	mRNA HIGH	5	0.00854701	mRNA LOW	0	0	FUSION	0	0	MISSENSE, INFRAME, TRUNCATING MUTATIONS (PUTATIVE DRIVER)	0	0
HNF4A	All	2	0.0034188	AMPLIFICATION	0	0	DEEP DELETION	0	0	mRNA HIGH	2	0.0034188	mRNA LOW	0	0	FUSION	0	0	MISSENSE, INFRAME, TRUNCATING MUTATIONS (PUTATIVE DRIVER)	0	0
HNRNPD	All	8	0.0136752	AMPLIFICATION	1	0.0017094	DEEP DELETION	0	0	mRNA HIGH	3	0.00512821	mRNA LOW	4	0.00683761	FUSION	0	0	MISSENSE, INFRAME, TRUNCATING MUTATIONS (PUTATIVE DRIVER)	0	0
HNRNPU	All	15	0.025641	AMPLIFICATION	7	0.0119658	DEEP DELETION	1	0.0017094	mRNA HIGH	1	0.0017094	mRNA LOW	6	0.0102564	FUSION	0	0	MISSENSE, INFRAME, TRUNCATING MUTATIONS (PUTATIVE DRIVER)	0	0
HS3ST2	All	10	0.017094	AMPLIFICATION	1	0.0017094	DEEP DELETION	2	0.0034188	mRNA HIGH	5	0.00854701	mRNA LOW	2	0.0034188	FUSION	0	0	MISSENSE, INFRAME, TRUNCATING MUTATIONS (PUTATIVE DRIVER)	0	0
HTR7	All	10	0.017094	AMPLIFICATION	2	0.0034188	DEEP DELETION	0	0	mRNA HIGH	4	0.00683761	mRNA LOW	4	0.00683761	FUSION	0	0	MISSENSE, INFRAME, TRUNCATING MUTATIONS (PUTATIVE DRIVER)	0	0
HUWE1	All	13	0.0222222	AMPLIFICATION	3	0.00512821	DEEP DELETION	0	0	mRNA HIGH	2	0.0034188	mRNA LOW	8	0.0136752	FUSION	0	0	MISSENSE, INFRAME, TRUNCATING MUTATIONS (PUTATIVE DRIVER)	0	0
ID1	All	10	0.017094	AMPLIFICATION	0	0	DEEP DELETION	0	0	mRNA HIGH	3	0.00512821	mRNA LOW	7	0.0119658	FUSION	0	0	MISSENSE, INFRAME, TRUNCATING MUTATIONS (PUTATIVE DRIVER)	0	0
ID2	All	12	0.0205128	AMPLIFICATION	4	0.00683761	DEEP DELETION	0	0	mRNA HIGH	4	0.00683761	mRNA LOW	4	0.00683761	FUSION	0	0	MISSENSE, INFRAME, TRUNCATING MUTATIONS (PUTATIVE DRIVER)	0	0
ID3	All	12	0.0205128	AMPLIFICATION	2	0.0034188	DEEP DELETION	0	0	mRNA HIGH	2	0.0034188	mRNA LOW	8	0.0136752	FUSION	0	0	MISSENSE, INFRAME, TRUNCATING MUTATIONS (PUTATIVE DRIVER)	0	0
ID4	All	12	0.0205128	AMPLIFICATION	3	0.00512821	DEEP DELETION	0	0	mRNA HIGH	2	0.0034188	mRNA LOW	7	0.0119658	FUSION	0	0	MISSENSE, INFRAME, TRUNCATING MUTATIONS (PUTATIVE DRIVER)	0	0
IL6	All	10	0.017094	AMPLIFICATION	5	0.00854701	DEEP DELETION	0	0	mRNA HIGH	3	0.00512821	mRNA LOW	2	0.0034188	FUSION	0	0	MISSENSE, INFRAME, TRUNCATING MUTATIONS (PUTATIVE DRIVER)	0	0
IMPDH2	All	7	0.0119658	AMPLIFICATION	0	0	DEEP DELETION	0	0	mRNA HIGH	4	0.00683761	mRNA LOW	3	0.00512821	FUSION	0	0	MISSENSE, INFRAME, TRUNCATING MUTATIONS (PUTATIVE DRIVER)	0	0
KCNA2	All	12	0.0205128	AMPLIFICATION	0	0	DEEP DELETION	0	0	mRNA HIGH	4	0.00683761	mRNA LOW	8	0.0136752	FUSION	0	0	MISSENSE, INFRAME, TRUNCATING MUTATIONS (PUTATIVE DRIVER)	0	0
KCND2	All	17	0.0290598	AMPLIFICATION	9	0.0153846	DEEP DELETION	0	0	mRNA HIGH	0	0	mRNA LOW	8	0.0136752	FUSION	0	0	MISSENSE, INFRAME, TRUNCATING MUTATIONS (PUTATIVE DRIVER)	0	0
KCNMA1	All	14	0.0239316	AMPLIFICATION	1	0.0017094	DEEP DELETION	2	0.0034188	mRNA HIGH	5	0.00854701	mRNA LOW	5	0.00854701	FUSION	1	0.0017094	MISSENSE, INFRAME, TRUNCATING MUTATIONS (PUTATIVE DRIVER)	0	0
KDM2A	All	11	0.0188034	AMPLIFICATION	1	0.0017094	DEEP DELETION	0	0	mRNA HIGH	0	0	mRNA LOW	10	0.017094	FUSION	0	0	MISSENSE, INFRAME, TRUNCATING MUTATIONS (PUTATIVE DRIVER)	0	0
KDM5A	All	17	0.0290598	AMPLIFICATION	9	0.0153846	DEEP DELETION	0	0	mRNA HIGH	5	0.00854701	mRNA LOW	3	0.00512821	FUSION	0	0	MISSENSE, INFRAME, TRUNCATING MUTATIONS (PUTATIVE DRIVER)	0	0
KDM5B	All	14	0.0239316	AMPLIFICATION	9	0.0153846	DEEP DELETION	0	0	mRNA HIGH	4	0.00683761	mRNA LOW	1	0.0017094	FUSION	0	0	MISSENSE, INFRAME, TRUNCATING MUTATIONS (PUTATIVE DRIVER)	0	0
KDM5C	All	9	0.0153846	AMPLIFICATION	2	0.0034188	DEEP DELETION	0	0	mRNA HIGH	2	0.0034188	mRNA LOW	4	0.00683761	FUSION	0	0	MISSENSE, INFRAME, TRUNCATING MUTATIONS (PUTATIVE DRIVER)	1	0.0017094
KDM8	All	6	0.0102564	AMPLIFICATION	0	0	DEEP DELETION	1	0.0017094	mRNA HIGH	3	0.00512821	mRNA LOW	2	0.0034188	FUSION	0	0	MISSENSE, INFRAME, TRUNCATING MUTATIONS (PUTATIVE DRIVER)	0	0
KLF10	All	7	0.0119658	AMPLIFICATION	0	0	DEEP DELETION	0	0	mRNA HIGH	4	0.00683761	mRNA LOW	3	0.00512821	FUSION	0	0	MISSENSE, INFRAME, TRUNCATING MUTATIONS (PUTATIVE DRIVER)	0	0
KMT2A	All	16	0.0273504	AMPLIFICATION	3	0.00512821	DEEP DELETION	0	0	mRNA HIGH	3	0.00512821	mRNA LOW	9	0.0153846	FUSION	0	0	MISSENSE, INFRAME, TRUNCATING MUTATIONS (PUTATIVE DRIVER)	1	0.0017094
LEPR	All	11	0.0188034	AMPLIFICATION	3	0.00512821	DEEP DELETION	1	0.0017094	mRNA HIGH	5	0.00854701	mRNA LOW	2	0.0034188	FUSION	0	0	MISSENSE, INFRAME, TRUNCATING MUTATIONS (PUTATIVE DRIVER)	0	0
LGR4	All	6	0.0102564	AMPLIFICATION	0	0	DEEP DELETION	0	0	mRNA HIGH	3	0.00512821	mRNA LOW	3	0.00512821	FUSION	0	0	MISSENSE, INFRAME, TRUNCATING MUTATIONS (PUTATIVE DRIVER)	0	0
MAGED1	All	9	0.0153846	AMPLIFICATION	0	0	DEEP DELETION	1	0.0017094	mRNA HIGH	3	0.00512821	mRNA LOW	5	0.00854701	FUSION	0	0	MISSENSE, INFRAME, TRUNCATING MUTATIONS (PUTATIVE DRIVER)	0	0
MAGEL2	All	10	0.017094	AMPLIFICATION	1	0.0017094	DEEP DELETION	0	0	mRNA HIGH	4	0.00683761	mRNA LOW	5	0.00854701	FUSION	0	0	MISSENSE, INFRAME, TRUNCATING MUTATIONS (PUTATIVE DRIVER)	0	0
MAPK8	All	11	0.0188034	AMPLIFICATION	0	0	DEEP DELETION	1	0.0017094	mRNA HIGH	6	0.0102564	mRNA LOW	4	0.00683761	FUSION	0	0	MISSENSE, INFRAME, TRUNCATING MUTATIONS (PUTATIVE DRIVER)	0	0
MAPK9	All	10	0.017094	AMPLIFICATION	0	0	DEEP DELETION	0	0	mRNA HIGH	6	0.0102564	mRNA LOW	4	0.00683761	FUSION	0	0	MISSENSE, INFRAME, TRUNCATING MUTATIONS (PUTATIVE DRIVER)	0	0
MAPK10	All	4	0.00683761	AMPLIFICATION	1	0.0017094	DEEP DELETION	0	0	mRNA HIGH	0	0	mRNA LOW	3	0.00512821	FUSION	0	0	MISSENSE, INFRAME, TRUNCATING MUTATIONS (PUTATIVE DRIVER)	0	0
MAT2A	All	11	0.0188034	AMPLIFICATION	4	0.00683761	DEEP DELETION	0	0	mRNA HIGH	2	0.0034188	mRNA LOW	5	0.00854701	FUSION	0	0	MISSENSE, INFRAME, TRUNCATING MUTATIONS (PUTATIVE DRIVER)	0	0
MC3R	All	3	0.00512821	AMPLIFICATION	0	0	DEEP DELETION	0	0	mRNA HIGH	3	0.00512821	mRNA LOW	0	0	FUSION	0	0	MISSENSE, INFRAME, TRUNCATING MUTATIONS (PUTATIVE DRIVER)	0	0
METTL3	All	5	0.00854701	AMPLIFICATION	0	0	DEEP DELETION	0	0	mRNA HIGH	3	0.00512821	mRNA LOW	2	0.0034188	FUSION	0	0	MISSENSE, INFRAME, TRUNCATING MUTATIONS (PUTATIVE DRIVER)	0	0
MTA1	All	8	0.0136752	AMPLIFICATION	1	0.0017094	DEEP DELETION	1	0.0017094	mRNA HIGH	2	0.0034188	mRNA LOW	4	0.00683761	FUSION	0	0	MISSENSE, INFRAME, TRUNCATING MUTATIONS (PUTATIVE DRIVER)	0	0
MTNR1A	All	8	0.0136752	AMPLIFICATION	1	0.0017094	DEEP DELETION	3	0.00512821	mRNA HIGH	4	0.00683761	mRNA LOW	0	0	FUSION	0	0	MISSENSE, INFRAME, TRUNCATING MUTATIONS (PUTATIVE DRIVER)	0	0
MTNR1B	All	6	0.0102564	AMPLIFICATION	4	0.00683761	DEEP DELETION	0	0	mRNA HIGH	2	0.0034188	mRNA LOW	0	0	FUSION	0	0	MISSENSE, INFRAME, TRUNCATING MUTATIONS (PUTATIVE DRIVER)	0	0
MTOR	All	19	0.0324786	AMPLIFICATION	3	0.00512821	DEEP DELETION	0	0	mRNA HIGH	2	0.0034188	mRNA LOW	8	0.0136752	FUSION	1	0.0017094	MISSENSE, INFRAME, TRUNCATING MUTATIONS (PUTATIVE DRIVER)	5	0.00854701
SLC25A19	All	14	0.0239316	AMPLIFICATION	5	0.00854701	DEEP DELETION	0	0	mRNA HIGH	7	0.0119658	mRNA LOW	2	0.0034188	FUSION	0	0	MISSENSE, INFRAME, TRUNCATING MUTATIONS (PUTATIVE DRIVER)	0	0
MYBBP1A	All	7	0.0119658	AMPLIFICATION	0	0	DEEP DELETION	0	0	mRNA HIGH	2	0.0034188	mRNA LOW	5	0.00854701	FUSION	0	0	MISSENSE, INFRAME, TRUNCATING MUTATIONS (PUTATIVE DRIVER)	0	0
MYCBP2	All	11	0.0188034	AMPLIFICATION	1	0.0017094	DEEP DELETION	2	0.0034188	mRNA HIGH	5	0.00854701	mRNA LOW	3	0.00512821	FUSION	0	0	MISSENSE, INFRAME, TRUNCATING MUTATIONS (PUTATIVE DRIVER)	0	0
NAGLU	All	11	0.0188034	AMPLIFICATION	0	0	DEEP DELETION	1	0.0017094	mRNA HIGH	4	0.00683761	mRNA LOW	6	0.0102564	FUSION	0	0	MISSENSE, INFRAME, TRUNCATING MUTATIONS (PUTATIVE DRIVER)	0	0
NAMPT	All	9	0.0153846	AMPLIFICATION	3	0.00512821	DEEP DELETION	0	0	mRNA HIGH	4	0.00683761	mRNA LOW	2	0.0034188	FUSION	0	0	MISSENSE, INFRAME, TRUNCATING MUTATIONS (PUTATIVE DRIVER)	0	0
NCOA2	All	9	0.0153846	AMPLIFICATION	1	0.0017094	DEEP DELETION	0	0	mRNA HIGH	2	0.0034188	mRNA LOW	6	0.0102564	FUSION	0	0	MISSENSE, INFRAME, TRUNCATING MUTATIONS (PUTATIVE DRIVER)	0	0
NCOR1	All	12	0.0205128	AMPLIFICATION	1	0.0017094	DEEP DELETION	1	0.0017094	mRNA HIGH	2	0.0034188	mRNA LOW	5	0.00854701	FUSION	0	0	MISSENSE, INFRAME, TRUNCATING MUTATIONS (PUTATIVE DRIVER)	3	0.00512821
NDUFA9	All	18	0.0307692	AMPLIFICATION	10	0.017094	DEEP DELETION	0	0	mRNA HIGH	6	0.0102564	mRNA LOW	2	0.0034188	FUSION	0	0	MISSENSE, INFRAME, TRUNCATING MUTATIONS (PUTATIVE DRIVER)	0	0
NFIL3	All	13	0.0222222	AMPLIFICATION	3	0.00512821	DEEP DELETION	1	0.0017094	mRNA HIGH	3	0.00512821	mRNA LOW	6	0.0102564	FUSION	0	0	MISSENSE, INFRAME, TRUNCATING MUTATIONS (PUTATIVE DRIVER)	0	0
NGFR	All	9	0.0153846	AMPLIFICATION	0	0	DEEP DELETION	1	0.0017094	mRNA HIGH	4	0.00683761	mRNA LOW	4	0.00683761	FUSION	0	0	MISSENSE, INFRAME, TRUNCATING MUTATIONS (PUTATIVE DRIVER)	0	0
NKX2-1	All	8	0.0136752	AMPLIFICATION	0	0	DEEP DELETION	0	0	mRNA HIGH	8	0.0136752	mRNA LOW	0	0	FUSION	0	0	MISSENSE, INFRAME, TRUNCATING MUTATIONS (PUTATIVE DRIVER)	0	0
NLGN1	All	22	0.0376068	AMPLIFICATION	9	0.0153846	DEEP DELETION	3	0.00512821	mRNA HIGH	1	0.0017094	mRNA LOW	7	0.0119658	FUSION	2	0.0034188	MISSENSE, INFRAME, TRUNCATING MUTATIONS (PUTATIVE DRIVER)	0	0
NMS	All	1	0.0017094	AMPLIFICATION	1	0.0017094	DEEP DELETION	0	0	mRNA HIGH	0	0	mRNA LOW	0	0	FUSION	0	0	MISSENSE, INFRAME, TRUNCATING MUTATIONS (PUTATIVE DRIVER)	0	0
NMU	All	62	0.105983	AMPLIFICATION	29	0.0495727	DEEP DELETION	0	0	mRNA HIGH	3	0.00512821	mRNA LOW	29	0.0495727	FUSION	1	0.0017094	MISSENSE, INFRAME, TRUNCATING MUTATIONS (PUTATIVE DRIVER)	0	0
NOCT	All	10	0.017094	AMPLIFICATION	0	0	DEEP DELETION	0	0	mRNA HIGH	5	0.00854701	mRNA LOW	5	0.00854701	FUSION	0	0	MISSENSE, INFRAME, TRUNCATING MUTATIONS (PUTATIVE DRIVER)	0	0
NONO	All	10	0.017094	AMPLIFICATION	1	0.0017094	DEEP DELETION	0	0	mRNA HIGH	3	0.00512821	mRNA LOW	6	0.0102564	FUSION	0	0	MISSENSE, INFRAME, TRUNCATING MUTATIONS (PUTATIVE DRIVER)	0	0
NPAS2	All	8	0.0136752	AMPLIFICATION	1	0.0017094	DEEP DELETION	2	0.0034188	mRNA HIGH	1	0.0017094	mRNA LOW	4	0.00683761	FUSION	0	0	MISSENSE, INFRAME, TRUNCATING MUTATIONS (PUTATIVE DRIVER)	0	0
NPS	All	3	0.00512821	AMPLIFICATION	0	0	DEEP DELETION	2	0.0034188	mRNA HIGH	1	0.0017094	mRNA LOW	0	0	FUSION	0	0	MISSENSE, INFRAME, TRUNCATING MUTATIONS (PUTATIVE DRIVER)	0	0
NPY2R	All	6	0.0102564	AMPLIFICATION	1	0.0017094	DEEP DELETION	0	0	mRNA HIGH	1	0.0017094	mRNA LOW	4	0.00683761	FUSION	0	0	MISSENSE, INFRAME, TRUNCATING MUTATIONS (PUTATIVE DRIVER)	0	0
NR0B2	All	96	0.164103	AMPLIFICATION	1	0.0017094	DEEP DELETION	0	0	mRNA HIGH	4	0.00683761	mRNA LOW	91	0.155556	FUSION	0	0	MISSENSE, INFRAME, TRUNCATING MUTATIONS (PUTATIVE DRIVER)	0	0
NR1D1	All	6	0.0102564	AMPLIFICATION	0	0	DEEP DELETION	1	0.0017094	mRNA HIGH	5	0.00854701	mRNA LOW	0	0	FUSION	0	0	MISSENSE, INFRAME, TRUNCATING MUTATIONS (PUTATIVE DRIVER)	0	0
NR1D2	All	8	0.0136752	AMPLIFICATION	0	0	DEEP DELETION	0	0	mRNA HIGH	3	0.00512821	mRNA LOW	5	0.00854701	FUSION	0	0	MISSENSE, INFRAME, TRUNCATING MUTATIONS (PUTATIVE DRIVER)	0	0
NR2F6	All	9	0.0153846	AMPLIFICATION	1	0.0017094	DEEP DELETION	1	0.0017094	mRNA HIGH	4	0.00683761	mRNA LOW	3	0.00512821	FUSION	0	0	MISSENSE, INFRAME, TRUNCATING MUTATIONS (PUTATIVE DRIVER)	0	0
NRIP1	All	13	0.0222222	AMPLIFICATION	4	0.00683761	DEEP DELETION	0	0	mRNA HIGH	4	0.00683761	mRNA LOW	5	0.00854701	FUSION	0	0	MISSENSE, INFRAME, TRUNCATING MUTATIONS (PUTATIVE DRIVER)	0	0
OGT	All	7	0.0119658	AMPLIFICATION	1	0.0017094	DEEP DELETION	0	0	mRNA HIGH	3	0.00512821	mRNA LOW	3	0.00512821	FUSION	0	0	MISSENSE, INFRAME, TRUNCATING MUTATIONS (PUTATIVE DRIVER)	0	0
OPN4	All	8	0.0136752	AMPLIFICATION	1	0.0017094	DEEP DELETION	0	0	mRNA HIGH	7	0.0119658	mRNA LOW	0	0	FUSION	0	0	MISSENSE, INFRAME, TRUNCATING MUTATIONS (PUTATIVE DRIVER)	0	0
OPN5	All	3	0.00512821	AMPLIFICATION	1	0.0017094	DEEP DELETION	0	0	mRNA HIGH	2	0.0034188	mRNA LOW	0	0	FUSION	0	0	MISSENSE, INFRAME, TRUNCATING MUTATIONS (PUTATIVE DRIVER)	0	0
OPRL1	All	14	0.0239316	AMPLIFICATION	5	0.00854701	DEEP DELETION	0	0	mRNA HIGH	5	0.00854701	mRNA LOW	4	0.00683761	FUSION	0	0	MISSENSE, INFRAME, TRUNCATING MUTATIONS (PUTATIVE DRIVER)	0	0
PDE6B	All	8	0.0136752	AMPLIFICATION	0	0	DEEP DELETION	1	0.0017094	mRNA HIGH	1	0.0017094	mRNA LOW	6	0.0102564	FUSION	0	0	MISSENSE, INFRAME, TRUNCATING MUTATIONS (PUTATIVE DRIVER)	0	0
PER1	All	7	0.0119658	AMPLIFICATION	0	0	DEEP DELETION	0	0	mRNA HIGH	1	0.0017094	mRNA LOW	6	0.0102564	FUSION	0	0	MISSENSE, INFRAME, TRUNCATING MUTATIONS (PUTATIVE DRIVER)	0	0
PER2	All	10	0.017094	AMPLIFICATION	0	0	DEEP DELETION	2	0.0034188	mRNA HIGH	3	0.00512821	mRNA LOW	5	0.00854701	FUSION	0	0	MISSENSE, INFRAME, TRUNCATING MUTATIONS (PUTATIVE DRIVER)	0	0
PER3	All	20	0.034188	AMPLIFICATION	1	0.0017094	DEEP DELETION	10	0.017094	mRNA HIGH	2	0.0034188	mRNA LOW	7	0.0119658	FUSION	0	0	MISSENSE, INFRAME, TRUNCATING MUTATIONS (PUTATIVE DRIVER)	0	0
PHLPP1	All	8	0.0136752	AMPLIFICATION	1	0.0017094	DEEP DELETION	1	0.0017094	mRNA HIGH	0	0	mRNA LOW	6	0.0102564	FUSION	0	0	MISSENSE, INFRAME, TRUNCATING MUTATIONS (PUTATIVE DRIVER)	0	0
PIWIL2	All	6	0.0102564	AMPLIFICATION	0	0	DEEP DELETION	0	0	mRNA HIGH	6	0.0102564	mRNA LOW	0	0	FUSION	0	0	MISSENSE, INFRAME, TRUNCATING MUTATIONS (PUTATIVE DRIVER)	0	0
PMCH	All	5	0.00854701	AMPLIFICATION	0	0	DEEP DELETION	0	0	mRNA HIGH	5	0.00854701	mRNA LOW	0	0	FUSION	0	0	MISSENSE, INFRAME, TRUNCATING MUTATIONS (PUTATIVE DRIVER)	0	0
PML	All	8	0.0136752	AMPLIFICATION	0	0	DEEP DELETION	0	0	mRNA HIGH	6	0.0102564	mRNA LOW	2	0.0034188	FUSION	0	0	MISSENSE, INFRAME, TRUNCATING MUTATIONS (PUTATIVE DRIVER)	0	0
PPARA	All	7	0.0119658	AMPLIFICATION	1	0.0017094	DEEP DELETION	2	0.0034188	mRNA HIGH	2	0.0034188	mRNA LOW	2	0.0034188	FUSION	0	0	MISSENSE, INFRAME, TRUNCATING MUTATIONS (PUTATIVE DRIVER)	0	0
PPARG	All	5	0.00854701	AMPLIFICATION	2	0.0034188	DEEP DELETION	0	0	mRNA HIGH	1	0.0017094	mRNA LOW	2	0.0034188	FUSION	0	0	MISSENSE, INFRAME, TRUNCATING MUTATIONS (PUTATIVE DRIVER)	0	0
PPARGC1A	All	10	0.017094	AMPLIFICATION	0	0	DEEP DELETION	2	0.0034188	mRNA HIGH	3	0.00512821	mRNA LOW	5	0.00854701	FUSION	0	0	MISSENSE, INFRAME, TRUNCATING MUTATIONS (PUTATIVE DRIVER)	0	0
PPP1CA	All	11	0.0188034	AMPLIFICATION	1	0.0017094	DEEP DELETION	0	0	mRNA HIGH	7	0.0119658	mRNA LOW	3	0.00512821	FUSION	0	0	MISSENSE, INFRAME, TRUNCATING MUTATIONS (PUTATIVE DRIVER)	0	0
PPP1CB	All	9	0.0153846	AMPLIFICATION	2	0.0034188	DEEP DELETION	0	0	mRNA HIGH	4	0.00683761	mRNA LOW	3	0.00512821	FUSION	0	0	MISSENSE, INFRAME, TRUNCATING MUTATIONS (PUTATIVE DRIVER)	0	0
PPP1CC	All	8	0.0136752	AMPLIFICATION	1	0.0017094	DEEP DELETION	1	0.0017094	mRNA HIGH	4	0.00683761	mRNA LOW	2	0.0034188	FUSION	0	0	MISSENSE, INFRAME, TRUNCATING MUTATIONS (PUTATIVE DRIVER)	0	0
PRF1	All	7	0.0119658	AMPLIFICATION	0	0	DEEP DELETION	1	0.0017094	mRNA HIGH	4	0.00683761	mRNA LOW	2	0.0034188	FUSION	0	0	MISSENSE, INFRAME, TRUNCATING MUTATIONS (PUTATIVE DRIVER)	0	0
PRKAA1	All	11	0.0188034	AMPLIFICATION	0	0	DEEP DELETION	0	0	mRNA HIGH	6	0.0102564	mRNA LOW	5	0.00854701	FUSION	0	0	MISSENSE, INFRAME, TRUNCATING MUTATIONS (PUTATIVE DRIVER)	0	0
PRKAA2	All	10	0.017094	AMPLIFICATION	0	0	DEEP DELETION	1	0.0017094	mRNA HIGH	2	0.0034188	mRNA LOW	7	0.0119658	FUSION	0	0	MISSENSE, INFRAME, TRUNCATING MUTATIONS (PUTATIVE DRIVER)	0	0
PRKCG	All	11	0.0188034	AMPLIFICATION	1	0.0017094	DEEP DELETION	2	0.0034188	mRNA HIGH	5	0.00854701	mRNA LOW	3	0.00512821	FUSION	0	0	MISSENSE, INFRAME, TRUNCATING MUTATIONS (PUTATIVE DRIVER)	0	0
PRKDC	All	8	0.0136752	AMPLIFICATION	0	0	DEEP DELETION	2	0.0034188	mRNA HIGH	3	0.00512821	mRNA LOW	3	0.00512821	FUSION	0	0	MISSENSE, INFRAME, TRUNCATING MUTATIONS (PUTATIVE DRIVER)	0	0
PRKG1	All	14	0.0239316	AMPLIFICATION	0	0	DEEP DELETION	9	0.0153846	mRNA HIGH	2	0.0034188	mRNA LOW	3	0.00512821	FUSION	0	0	MISSENSE, INFRAME, TRUNCATING MUTATIONS (PUTATIVE DRIVER)	0	0
PRKG2	All	10	0.017094	AMPLIFICATION	1	0.0017094	DEEP DELETION	0	0	mRNA HIGH	9	0.0153846	mRNA LOW	0	0	FUSION	0	0	MISSENSE, INFRAME, TRUNCATING MUTATIONS (PUTATIVE DRIVER)	0	0
PRMT5	All	5	0.00854701	AMPLIFICATION	2	0.0034188	DEEP DELETION	0	0	mRNA HIGH	2	0.0034188	mRNA LOW	1	0.0017094	FUSION	0	0	MISSENSE, INFRAME, TRUNCATING MUTATIONS (PUTATIVE DRIVER)	0	0
PROK1	All	5	0.00854701	AMPLIFICATION	0	0	DEEP DELETION	0	0	mRNA HIGH	5	0.00854701	mRNA LOW	0	0	FUSION	0	0	MISSENSE, INFRAME, TRUNCATING MUTATIONS (PUTATIVE DRIVER)	0	0
PROK2	All	7	0.0119658	AMPLIFICATION	0	0	DEEP DELETION	0	0	mRNA HIGH	7	0.0119658	mRNA LOW	0	0	FUSION	0	0	MISSENSE, INFRAME, TRUNCATING MUTATIONS (PUTATIVE DRIVER)	0	0
PROKR1	All	6	0.0102564	AMPLIFICATION	1	0.0017094	DEEP DELETION	0	0	mRNA HIGH	5	0.00854701	mRNA LOW	0	0	FUSION	0	0	MISSENSE, INFRAME, TRUNCATING MUTATIONS (PUTATIVE DRIVER)	0	0
PROKR2	All	3	0.00512821	AMPLIFICATION	0	0	DEEP DELETION	0	0	mRNA HIGH	3	0.00512821	mRNA LOW	0	0	FUSION	0	0	MISSENSE, INFRAME, TRUNCATING MUTATIONS (PUTATIVE DRIVER)	0	0
PROX1	All	10	0.017094	AMPLIFICATION	1	0.0017094	DEEP DELETION	1	0.0017094	mRNA HIGH	2	0.0034188	mRNA LOW	6	0.0102564	FUSION	0	0	MISSENSE, INFRAME, TRUNCATING MUTATIONS (PUTATIVE DRIVER)	0	0
PSPC1	All	7	0.0119658	AMPLIFICATION	1	0.0017094	DEEP DELETION	2	0.0034188	mRNA HIGH	1	0.0017094	mRNA LOW	3	0.00512821	FUSION	0	0	MISSENSE, INFRAME, TRUNCATING MUTATIONS (PUTATIVE DRIVER)	0	0
PTEN	All	178	0.304273	AMPLIFICATION	1	0.0017094	DEEP DELETION	55	0.0940171	mRNA HIGH	2	0.0034188	mRNA LOW	5	0.00854701	FUSION	0	0	MISSENSE, INFRAME, TRUNCATING MUTATIONS (PUTATIVE DRIVER)	115	0.196581
PTGDS	All	15	0.025641	AMPLIFICATION	6	0.0102564	DEEP DELETION	0	0	mRNA HIGH	1	0.0017094	mRNA LOW	8	0.0136752	FUSION	0	0	MISSENSE, INFRAME, TRUNCATING MUTATIONS (PUTATIVE DRIVER)	0	0
PTGER3	All	12	0.0205128	AMPLIFICATION	1	0.0017094	DEEP DELETION	1	0.0017094	mRNA HIGH	10	0.017094	mRNA LOW	0	0	FUSION	0	0	MISSENSE, INFRAME, TRUNCATING MUTATIONS (PUTATIVE DRIVER)	0	0
PTGER4	All	5	0.00854701	AMPLIFICATION	0	0	DEEP DELETION	0	0	mRNA HIGH	5	0.00854701	mRNA LOW	0	0	FUSION	0	0	MISSENSE, INFRAME, TRUNCATING MUTATIONS (PUTATIVE DRIVER)	0	0
RAI1	All	13	0.0222222	AMPLIFICATION	0	0	DEEP DELETION	1	0.0017094	mRNA HIGH	3	0.00512821	mRNA LOW	8	0.0136752	FUSION	1	0.0017094	MISSENSE, INFRAME, TRUNCATING MUTATIONS (PUTATIVE DRIVER)	0	0
RBM4	All	7	0.0119658	AMPLIFICATION	1	0.0017094	DEEP DELETION	0	0	mRNA HIGH	4	0.00683761	mRNA LOW	2	0.0034188	FUSION	0	0	MISSENSE, INFRAME, TRUNCATING MUTATIONS (PUTATIVE DRIVER)	0	0
RBM4B	All	9	0.0153846	AMPLIFICATION	1	0.0017094	DEEP DELETION	0	0	mRNA HIGH	4	0.00683761	mRNA LOW	4	0.00683761	FUSION	0	0	MISSENSE, INFRAME, TRUNCATING MUTATIONS (PUTATIVE DRIVER)	0	0
RELB	All	8	0.0136752	AMPLIFICATION	1	0.0017094	DEEP DELETION	0	0	mRNA HIGH	4	0.00683761	mRNA LOW	3	0.00512821	FUSION	0	0	MISSENSE, INFRAME, TRUNCATING MUTATIONS (PUTATIVE DRIVER)	0	0
ROCK2	All	12	0.0205128	AMPLIFICATION	4	0.00683761	DEEP DELETION	0	0	mRNA HIGH	2	0.0034188	mRNA LOW	6	0.0102564	FUSION	0	0	MISSENSE, INFRAME, TRUNCATING MUTATIONS (PUTATIVE DRIVER)	0	0
RORA	All	10	0.017094	AMPLIFICATION	0	0	DEEP DELETION	3	0.00512821	mRNA HIGH	2	0.0034188	mRNA LOW	5	0.00854701	FUSION	0	0	MISSENSE, INFRAME, TRUNCATING MUTATIONS (PUTATIVE DRIVER)	0	0
RORB	All	12	0.0205128	AMPLIFICATION	4	0.00683761	DEEP DELETION	1	0.0017094	mRNA HIGH	0	0	mRNA LOW	7	0.0119658	FUSION	0	0	MISSENSE, INFRAME, TRUNCATING MUTATIONS (PUTATIVE DRIVER)	0	0
RORC	All	17	0.0290598	AMPLIFICATION	2	0.0034188	DEEP DELETION	0	0	mRNA HIGH	7	0.0119658	mRNA LOW	8	0.0136752	FUSION	0	0	MISSENSE, INFRAME, TRUNCATING MUTATIONS (PUTATIVE DRIVER)	0	0
SETX	All	11	0.0188034	AMPLIFICATION	3	0.00512821	DEEP DELETION	0	0	mRNA HIGH	2	0.0034188	mRNA LOW	6	0.0102564	FUSION	0	0	MISSENSE, INFRAME, TRUNCATING MUTATIONS (PUTATIVE DRIVER)	0	0
SFPQ	All	9	0.0153846	AMPLIFICATION	3	0.00512821	DEEP DELETION	0	0	mRNA HIGH	4	0.00683761	mRNA LOW	2	0.0034188	FUSION	0	0	MISSENSE, INFRAME, TRUNCATING MUTATIONS (PUTATIVE DRIVER)	0	0
SIAH2	All	6	0.0102564	AMPLIFICATION	1	0.0017094	DEEP DELETION	0	0	mRNA HIGH	3	0.00512821	mRNA LOW	2	0.0034188	FUSION	0	0	MISSENSE, INFRAME, TRUNCATING MUTATIONS (PUTATIVE DRIVER)	0	0
SIK1	All	7	0.0119658	AMPLIFICATION	0	0	DEEP DELETION	0	0	mRNA HIGH	3	0.00512821	mRNA LOW	4	0.00683761	FUSION	0	0	MISSENSE, INFRAME, TRUNCATING MUTATIONS (PUTATIVE DRIVER)	0	0
SIN3A	All	11	0.0188034	AMPLIFICATION	1	0.0017094	DEEP DELETION	0	0	mRNA HIGH	5	0.00854701	mRNA LOW	5	0.00854701	FUSION	0	0	MISSENSE, INFRAME, TRUNCATING MUTATIONS (PUTATIVE DRIVER)	0	0
SIRT1	All	7	0.0119658	AMPLIFICATION	0	0	DEEP DELETION	0	0	mRNA HIGH	5	0.00854701	mRNA LOW	2	0.0034188	FUSION	0	0	MISSENSE, INFRAME, TRUNCATING MUTATIONS (PUTATIVE DRIVER)	0	0
SIX3	All	8	0.0136752	AMPLIFICATION	0	0	DEEP DELETION	0	0	mRNA HIGH	8	0.0136752	mRNA LOW	0	0	FUSION	0	0	MISSENSE, INFRAME, TRUNCATING MUTATIONS (PUTATIVE DRIVER)	0	0
SLC6A4	All	28	0.0478633	AMPLIFICATION	0	0	DEEP DELETION	2	0.0034188	mRNA HIGH	2	0.0034188	mRNA LOW	24	0.0410256	FUSION	0	0	MISSENSE, INFRAME, TRUNCATING MUTATIONS (PUTATIVE DRIVER)	0	0
SOX14	All	151	0.25812	AMPLIFICATION	1	0.0017094	DEEP DELETION	0	0	mRNA HIGH	0	0	mRNA LOW	150	0.25641	FUSION	0	0	MISSENSE, INFRAME, TRUNCATING MUTATIONS (PUTATIVE DRIVER)	0	0
SPSB4	All	11	0.0188034	AMPLIFICATION	2	0.0034188	DEEP DELETION	1	0.0017094	mRNA HIGH	1	0.0017094	mRNA LOW	7	0.0119658	FUSION	0	0	MISSENSE, INFRAME, TRUNCATING MUTATIONS (PUTATIVE DRIVER)	0	0
SRRD	All	6	0.0102564	AMPLIFICATION	0	0	DEEP DELETION	0	0	mRNA HIGH	3	0.00512821	mRNA LOW	3	0.00512821	FUSION	0	0	MISSENSE, INFRAME, TRUNCATING MUTATIONS (PUTATIVE DRIVER)	0	0
SUV39H1	All	9	0.0153846	AMPLIFICATION	0	0	DEEP DELETION	1	0.0017094	mRNA HIGH	5	0.00854701	mRNA LOW	3	0.00512821	FUSION	0	0	MISSENSE, INFRAME, TRUNCATING MUTATIONS (PUTATIVE DRIVER)	0	0
SUV39H2	All	13	0.0222222	AMPLIFICATION	4	0.00683761	DEEP DELETION	0	0	mRNA HIGH	9	0.0153846	mRNA LOW	0	0	FUSION	0	0	MISSENSE, INFRAME, TRUNCATING MUTATIONS (PUTATIVE DRIVER)	0	0
TARDBP	All	8	0.0136752	AMPLIFICATION	2	0.0034188	DEEP DELETION	0	0	mRNA HIGH	0	0	mRNA LOW	6	0.0102564	FUSION	0	0	MISSENSE, INFRAME, TRUNCATING MUTATIONS (PUTATIVE DRIVER)	0	0
THRAP3	All	9	0.0153846	AMPLIFICATION	3	0.00512821	DEEP DELETION	0	0	mRNA HIGH	0	0	mRNA LOW	6	0.0102564	FUSION	0	0	MISSENSE, INFRAME, TRUNCATING MUTATIONS (PUTATIVE DRIVER)	0	0
TIMELESS	All	16	0.0273504	AMPLIFICATION	7	0.0119658	DEEP DELETION	1	0.0017094	mRNA HIGH	1	0.0017094	mRNA LOW	7	0.0119658	FUSION	0	0	MISSENSE, INFRAME, TRUNCATING MUTATIONS (PUTATIVE DRIVER)	0	0
TNFRSF11A	All	8	0.0136752	AMPLIFICATION	0	0	DEEP DELETION	1	0.0017094	mRNA HIGH	2	0.0034188	mRNA LOW	5	0.00854701	FUSION	0	0	MISSENSE, INFRAME, TRUNCATING MUTATIONS (PUTATIVE DRIVER)	0	0
TOP1	All	11	0.0188034	AMPLIFICATION	3	0.00512821	DEEP DELETION	0	0	mRNA HIGH	2	0.0034188	mRNA LOW	6	0.0102564	FUSION	0	0	MISSENSE, INFRAME, TRUNCATING MUTATIONS (PUTATIVE DRIVER)	0	0
TOP2A	All	8	0.0136752	AMPLIFICATION	0	0	DEEP DELETION	1	0.0017094	mRNA HIGH	0	0	mRNA LOW	7	0.0119658	FUSION	0	0	MISSENSE, INFRAME, TRUNCATING MUTATIONS (PUTATIVE DRIVER)	0	0
TP53	All	136	0.232479	AMPLIFICATION	0	0	DEEP DELETION	5	0.00854701	mRNA HIGH	3	0.00512821	mRNA LOW	7	0.0119658	FUSION	0	0	MISSENSE, INFRAME, TRUNCATING MUTATIONS (PUTATIVE DRIVER)	121	0.206838
UBE3A	All	9	0.0153846	AMPLIFICATION	1	0.0017094	DEEP DELETION	0	0	mRNA HIGH	1	0.0017094	mRNA LOW	7	0.0119658	FUSION	0	0	MISSENSE, INFRAME, TRUNCATING MUTATIONS (PUTATIVE DRIVER)	0	0
USP2	All	7	0.0119658	AMPLIFICATION	3	0.00512821	DEEP DELETION	0	0	mRNA HIGH	1	0.0017094	mRNA LOW	3	0.00512821	FUSION	0	0	MISSENSE, INFRAME, TRUNCATING MUTATIONS (PUTATIVE DRIVER)	0	0
USP7	All	13	0.0222222	AMPLIFICATION	2	0.0034188	DEEP DELETION	0	0	mRNA HIGH	2	0.0034188	mRNA LOW	9	0.0153846	FUSION	0	0	MISSENSE, INFRAME, TRUNCATING MUTATIONS (PUTATIVE DRIVER)	0	0
USP9X	All	9	0.0153846	AMPLIFICATION	0	0	DEEP DELETION	1	0.0017094	mRNA HIGH	2	0.0034188	mRNA LOW	6	0.0102564	FUSION	0	0	MISSENSE, INFRAME, TRUNCATING MUTATIONS (PUTATIVE DRIVER)	0	0
UTS2	All	14	0.0239316	AMPLIFICATION	1	0.0017094	DEEP DELETION	10	0.017094	mRNA HIGH	3	0.00512821	mRNA LOW	0	0	FUSION	0	0	MISSENSE, INFRAME, TRUNCATING MUTATIONS (PUTATIVE DRIVER)	0	0
UTS2R	All	2	0.0034188	AMPLIFICATION	0	0	DEEP DELETION	0	0	mRNA HIGH	2	0.0034188	mRNA LOW	0	0	FUSION	0	0	MISSENSE, INFRAME, TRUNCATING MUTATIONS (PUTATIVE DRIVER)	0	0
ZFHX3	All	9	0.0153846	AMPLIFICATION	0	0	DEEP DELETION	0	0	mRNA HIGH	3	0.00512821	mRNA LOW	5	0.00854701	FUSION	0	0	MISSENSE, INFRAME, TRUNCATING MUTATIONS (PUTATIVE DRIVER)	1	0.0017094
ZPBP2	All	152	0.259829	AMPLIFICATION	0	0	DEEP DELETION	1	0.0017094	mRNA HIGH	1	0.0017094	mRNA LOW	150	0.25641	FUSION	0	0	MISSENSE, INFRAME, TRUNCATING MUTATIONS (PUTATIVE DRIVER)	0	0
Mean (average/6)			0.0226537			0.00316986			0.00151855			0.0055763	0		0.0102149			8.2981e-05			0.00209111

## Sheet: ST_5
Supplementary Table 5. Frequency of alterations belonging to 57 individuals with TCGA-UCS
GENE	TYPE	TOTAL	f	TYPE	TOTAL	f	TYPE	TOTAL	f	TYPE	TOTAL	f	TYPE	TOTAL	f	TYPE	TOTAL	f	TYPE	TOTAL	f
AANAT	All	3	0.0526316	AMPLIFICATION	1	0.0175439	DEEP DELETION	0	0	mRNA HIGH	2	0.0350877	mRNA LOW	0	0	FUSION	0	0	MISSENSE, INFRAME, TRUNCATING MUTATIONS (PUTATIVE DRIVER)	0	0
ADA	All	8	0.140351	AMPLIFICATION	5	0.0877193	DEEP DELETION	0	0	mRNA HIGH	0	0	mRNA LOW	3	0.0526316	FUSION	0	0	MISSENSE, INFRAME, TRUNCATING MUTATIONS (PUTATIVE DRIVER)	0	0
ADCY1	All	3	0.0526316	AMPLIFICATION	0	0	DEEP DELETION	0	0	mRNA HIGH	1	0.0175439	mRNA LOW	2	0.0350877	FUSION	0	0	MISSENSE, INFRAME, TRUNCATING MUTATIONS (PUTATIVE DRIVER)	0	0
ADORA1	All	3	0.0526316	AMPLIFICATION	1	0.0175439	DEEP DELETION	0	0	mRNA HIGH	0	0	mRNA LOW	2	0.0350877	FUSION	0	0	MISSENSE, INFRAME, TRUNCATING MUTATIONS (PUTATIVE DRIVER)	0	0
ADORA2A	All	1	0.0175439	AMPLIFICATION	1	0.0175439	DEEP DELETION	0	0	mRNA HIGH	0	0	mRNA LOW	0	0	FUSION	0	0	MISSENSE, INFRAME, TRUNCATING MUTATIONS (PUTATIVE DRIVER)	0	0
ADRB1	All	4	0.0701754	AMPLIFICATION	0	0	DEEP DELETION	0	0	mRNA HIGH	3	0.0526316	mRNA LOW	1	0.0175439	FUSION	0	0	MISSENSE, INFRAME, TRUNCATING MUTATIONS (PUTATIVE DRIVER)	0	0
AHCY	All	5	0.0877193	AMPLIFICATION	3	0.0526316	DEEP DELETION	0	0	mRNA HIGH	2	0.0350877	mRNA LOW	0	0	FUSION	0	0	MISSENSE, INFRAME, TRUNCATING MUTATIONS (PUTATIVE DRIVER)	0	0
AHR	All	3	0.0526316	AMPLIFICATION	0	0	DEEP DELETION	0	0	mRNA HIGH	1	0.0175439	mRNA LOW	2	0.0350877	FUSION	0	0	MISSENSE, INFRAME, TRUNCATING MUTATIONS (PUTATIVE DRIVER)	0	0
ALB	All	3	0.0526316	AMPLIFICATION	0	0	DEEP DELETION	0	0	mRNA HIGH	3	0.0526316	mRNA LOW	0	0	FUSION	0	0	MISSENSE, INFRAME, TRUNCATING MUTATIONS (PUTATIVE DRIVER)	0	0
ANKFN1	All	2	0.0350877	AMPLIFICATION	0	0	DEEP DELETION	0	0	mRNA HIGH	2	0.0350877	mRNA LOW	0	0	FUSION	0	0	MISSENSE, INFRAME, TRUNCATING MUTATIONS (PUTATIVE DRIVER)	0	0
ARNTL	All	4	0.0701754	AMPLIFICATION	1	0.0175439	DEEP DELETION	0	0	mRNA HIGH	1	0.0175439	mRNA LOW	2	0.0350877	FUSION	0	0	MISSENSE, INFRAME, TRUNCATING MUTATIONS (PUTATIVE DRIVER)	0	0
ARNTL2	All	6	0.105263	AMPLIFICATION	3	0.0526316	DEEP DELETION	0	0	mRNA HIGH	2	0.0350877	mRNA LOW	1	0.0175439	FUSION	0	0	MISSENSE, INFRAME, TRUNCATING MUTATIONS (PUTATIVE DRIVER)	0	0
ASS1	All	4	0.0701754	AMPLIFICATION	1	0.0175439	DEEP DELETION	0	0	mRNA HIGH	2	0.0350877	mRNA LOW	1	0.0175439	FUSION	0	0	MISSENSE, INFRAME, TRUNCATING MUTATIONS (PUTATIVE DRIVER)	0	0
ATF4	All	4	0.0701754	AMPLIFICATION	0	0	DEEP DELETION	0	0	mRNA HIGH	2	0.0350877	mRNA LOW	2	0.0350877	FUSION	0	0	MISSENSE, INFRAME, TRUNCATING MUTATIONS (PUTATIVE DRIVER)	0	0
ATG7	All	3	0.0526316	AMPLIFICATION	0	0	DEEP DELETION	0	0	mRNA HIGH	1	0.0175439	mRNA LOW	2	0.0350877	FUSION	0	0	MISSENSE, INFRAME, TRUNCATING MUTATIONS (PUTATIVE DRIVER)	0	0
ATOH7	All	3	0.0526316	AMPLIFICATION	0	0	DEEP DELETION	0	0	mRNA HIGH	2	0.0350877	mRNA LOW	1	0.0175439	FUSION	0	0	MISSENSE, INFRAME, TRUNCATING MUTATIONS (PUTATIVE DRIVER)	0	0
BHLHE40	All	4	0.0701754	AMPLIFICATION	0	0	DEEP DELETION	0	0	mRNA HIGH	1	0.0175439	mRNA LOW	3	0.0526316	FUSION	0	0	MISSENSE, INFRAME, TRUNCATING MUTATIONS (PUTATIVE DRIVER)	0	0
BHLHE41	All	6	0.105263	AMPLIFICATION	3	0.0526316	DEEP DELETION	0	0	mRNA HIGH	3	0.0526316	mRNA LOW	0	0	FUSION	0	0	MISSENSE, INFRAME, TRUNCATING MUTATIONS (PUTATIVE DRIVER)	0	0
BTBD9	All	5	0.0877193	AMPLIFICATION	2	0.0350877	DEEP DELETION	0	0	mRNA HIGH	1	0.0175439	mRNA LOW	2	0.0350877	FUSION	0	0	MISSENSE, INFRAME, TRUNCATING MUTATIONS (PUTATIVE DRIVER)	0	0
BTRC	All	2	0.0350877	AMPLIFICATION	0	0	DEEP DELETION	0	0	mRNA HIGH	1	0.0175439	mRNA LOW	1	0.0175439	FUSION	0	0	MISSENSE, INFRAME, TRUNCATING MUTATIONS (PUTATIVE DRIVER)	0	0
CARTPT	All	0	0	AMPLIFICATION	0	0	DEEP DELETION	0	0	mRNA HIGH	0	0	mRNA LOW	0	0	FUSION	0	0	MISSENSE, INFRAME, TRUNCATING MUTATIONS (PUTATIVE DRIVER)	0	0
CASP1	All	5	0.0877193	AMPLIFICATION	2	0.0350877	DEEP DELETION	1	0.0175439	mRNA HIGH	1	0.0175439	mRNA LOW	1	0.0175439	FUSION	0	0	MISSENSE, INFRAME, TRUNCATING MUTATIONS (PUTATIVE DRIVER)	0	0
CAVIN3	All	3	0.0526316	AMPLIFICATION	0	0	DEEP DELETION	0	0	mRNA HIGH	1	0.0175439	mRNA LOW	2	0.0350877	FUSION	0	0	MISSENSE, INFRAME, TRUNCATING MUTATIONS (PUTATIVE DRIVER)	0	0
CCAR2	All	4	0.0701754	AMPLIFICATION	0	0	DEEP DELETION	2	0.0350877	mRNA HIGH	1	0.0175439	mRNA LOW	1	0.0175439	FUSION	0	0	MISSENSE, INFRAME, TRUNCATING MUTATIONS (PUTATIVE DRIVER)	0	0
CDK1	All	5	0.0877193	AMPLIFICATION	4	0.0701754	DEEP DELETION	0	0	mRNA HIGH	1	0.0175439	mRNA LOW	0	0	FUSION	0	0	MISSENSE, INFRAME, TRUNCATING MUTATIONS (PUTATIVE DRIVER)	0	0
CHRNB2	All	7	0.122807	AMPLIFICATION	4	0.0701754	DEEP DELETION	0	0	mRNA HIGH	1	0.0175439	mRNA LOW	2	0.0350877	FUSION	0	0	MISSENSE, INFRAME, TRUNCATING MUTATIONS (PUTATIVE DRIVER)	0	0
CIART	All	5	0.0877193	AMPLIFICATION	3	0.0526316	DEEP DELETION	0	0	mRNA HIGH	0	0	mRNA LOW	2	0.0350877	FUSION	0	0	MISSENSE, INFRAME, TRUNCATING MUTATIONS (PUTATIVE DRIVER)	0	0
CIPC	All	2	0.0350877	AMPLIFICATION	1	0.0175439	DEEP DELETION	0	0	mRNA HIGH	1	0.0175439	mRNA LOW	0	0	FUSION	0	0	MISSENSE, INFRAME, TRUNCATING MUTATIONS (PUTATIVE DRIVER)	0	0
CLOCK	All	1	0.0175439	AMPLIFICATION	0	0	DEEP DELETION	0	0	mRNA HIGH	1	0.0175439	mRNA LOW	0	0	FUSION	0	0	MISSENSE, INFRAME, TRUNCATING MUTATIONS (PUTATIVE DRIVER)	0	0
CORT	All	2	0.0350877	AMPLIFICATION	0	0	DEEP DELETION	0	0	mRNA HIGH	2	0.0350877	mRNA LOW	0	0	FUSION	0	0	MISSENSE, INFRAME, TRUNCATING MUTATIONS (PUTATIVE DRIVER)	0	0
CREB1	All	5	0.0877193	AMPLIFICATION	0	0	DEEP DELETION	0	0	mRNA HIGH	2	0.0350877	mRNA LOW	3	0.0526316	FUSION	0	0	MISSENSE, INFRAME, TRUNCATING MUTATIONS (PUTATIVE DRIVER)	0	0
CREM	All	4	0.0701754	AMPLIFICATION	0	0	DEEP DELETION	0	0	mRNA HIGH	2	0.0350877	mRNA LOW	2	0.0350877	FUSION	0	0	MISSENSE, INFRAME, TRUNCATING MUTATIONS (PUTATIVE DRIVER)	0	0
CRTC1	All	6	0.105263	AMPLIFICATION	2	0.0350877	DEEP DELETION	0	0	mRNA HIGH	0	0	mRNA LOW	2	0.0350877	FUSION	2	0.0350877	MISSENSE, INFRAME, TRUNCATING MUTATIONS (PUTATIVE DRIVER)	0	0
CRY1	All	3	0.0526316	AMPLIFICATION	0	0	DEEP DELETION	0	0	mRNA HIGH	1	0.0175439	mRNA LOW	2	0.0350877	FUSION	0	0	MISSENSE, INFRAME, TRUNCATING MUTATIONS (PUTATIVE DRIVER)	0	0
CRY2	All	4	0.0701754	AMPLIFICATION	0	0	DEEP DELETION	0	0	mRNA HIGH	2	0.0350877	mRNA LOW	1	0.0175439	FUSION	1	0.0175439	MISSENSE, INFRAME, TRUNCATING MUTATIONS (PUTATIVE DRIVER)	0	0
CSF2	All	3	0.0526316	AMPLIFICATION	1	0.0175439	DEEP DELETION	0	0	mRNA HIGH	2	0.0350877	mRNA LOW	0	0	FUSION	0	0	MISSENSE, INFRAME, TRUNCATING MUTATIONS (PUTATIVE DRIVER)	0	0
CSNK1D	All	4	0.0701754	AMPLIFICATION	2	0.0350877	DEEP DELETION	0	0	mRNA HIGH	1	0.0175439	mRNA LOW	1	0.0175439	FUSION	0	0	MISSENSE, INFRAME, TRUNCATING MUTATIONS (PUTATIVE DRIVER)	0	0
CSNK1E	All	2	0.0350877	AMPLIFICATION	1	0.0175439	DEEP DELETION	0	0	mRNA HIGH	1	0.0175439	mRNA LOW	0	0	FUSION	0	0	MISSENSE, INFRAME, TRUNCATING MUTATIONS (PUTATIVE DRIVER)	0	0
CYP7B1	All	8	0.140351	AMPLIFICATION	6	0.105263	DEEP DELETION	1	0.0175439	mRNA HIGH	1	0.0175439	mRNA LOW	0	0	FUSION	0	0	MISSENSE, INFRAME, TRUNCATING MUTATIONS (PUTATIVE DRIVER)	0	0
DBP	All	5	0.0877193	AMPLIFICATION	2	0.0350877	DEEP DELETION	0	0	mRNA HIGH	3	0.0526316	mRNA LOW	0	0	FUSION	0	0	MISSENSE, INFRAME, TRUNCATING MUTATIONS (PUTATIVE DRIVER)	0	0
DDB1	All	4	0.0701754	AMPLIFICATION	1	0.0175439	DEEP DELETION	1	0.0175439	mRNA HIGH	1	0.0175439	mRNA LOW	1	0.0175439	FUSION	0	0	MISSENSE, INFRAME, TRUNCATING MUTATIONS (PUTATIVE DRIVER)	0	0
DDX5	All	3	0.0526316	AMPLIFICATION	0	0	DEEP DELETION	0	0	mRNA HIGH	1	0.0175439	mRNA LOW	2	0.0350877	FUSION	0	0	MISSENSE, INFRAME, TRUNCATING MUTATIONS (PUTATIVE DRIVER)	0	0
DHX9	All	5	0.0877193	AMPLIFICATION	2	0.0350877	DEEP DELETION	0	0	mRNA HIGH	0	0	mRNA LOW	3	0.0526316	FUSION	0	0	MISSENSE, INFRAME, TRUNCATING MUTATIONS (PUTATIVE DRIVER)	0	0
DPYD	All	2	0.0350877	AMPLIFICATION	0	0	DEEP DELETION	0	0	mRNA HIGH	1	0.0175439	mRNA LOW	1	0.0175439	FUSION	0	0	MISSENSE, INFRAME, TRUNCATING MUTATIONS (PUTATIVE DRIVER)	0	0
DRD1	All	11	0.192982	AMPLIFICATION	1	0.0175439	DEEP DELETION	0	0	mRNA HIGH	2	0.0350877	mRNA LOW	8	0.140351	FUSION	0	0	MISSENSE, INFRAME, TRUNCATING MUTATIONS (PUTATIVE DRIVER)	0	0
DRD2	All	3	0.0526316	AMPLIFICATION	1	0.0175439	DEEP DELETION	1	0.0175439	mRNA HIGH	1	0.0175439	mRNA LOW	0	0	FUSION	0	0	MISSENSE, INFRAME, TRUNCATING MUTATIONS (PUTATIVE DRIVER)	0	0
DRD3	All	1	0.0175439	AMPLIFICATION	0	0	DEEP DELETION	1	0.0175439	mRNA HIGH	0	0	mRNA LOW	0	0	FUSION	0	0	MISSENSE, INFRAME, TRUNCATING MUTATIONS (PUTATIVE DRIVER)	0	0
DRD4	All	4	0.0701754	AMPLIFICATION	1	0.0175439	DEEP DELETION	1	0.0175439	mRNA HIGH	2	0.0350877	mRNA LOW	0	0	FUSION	0	0	MISSENSE, INFRAME, TRUNCATING MUTATIONS (PUTATIVE DRIVER)	0	0
DYRK1A	All	4	0.0701754	AMPLIFICATION	0	0	DEEP DELETION	0	0	mRNA HIGH	2	0.0350877	mRNA LOW	2	0.0350877	FUSION	0	0	MISSENSE, INFRAME, TRUNCATING MUTATIONS (PUTATIVE DRIVER)	0	0
EGR1	All	4	0.0701754	AMPLIFICATION	1	0.0175439	DEEP DELETION	0	0	mRNA HIGH	1	0.0175439	mRNA LOW	2	0.0350877	FUSION	0	0	MISSENSE, INFRAME, TRUNCATING MUTATIONS (PUTATIVE DRIVER)	0	0
EP300	All	3	0.0526316	AMPLIFICATION	0	0	DEEP DELETION	0	0	mRNA HIGH	0	0	mRNA LOW	2	0.0350877	FUSION	0	0	MISSENSE, INFRAME, TRUNCATING MUTATIONS (PUTATIVE DRIVER)	1	0.0175439
EZH2	All	7	0.122807	AMPLIFICATION	2	0.0350877	DEEP DELETION	0	0	mRNA HIGH	2	0.0350877	mRNA LOW	2	0.0350877	FUSION	0	0	MISSENSE, INFRAME, TRUNCATING MUTATIONS (PUTATIVE DRIVER)	1	0.0175439
FBXL3	All	9	0.157895	AMPLIFICATION	4	0.0701754	DEEP DELETION	1	0.0175439	mRNA HIGH	1	0.0175439	mRNA LOW	2	0.0350877	FUSION	1	0.0175439	MISSENSE, INFRAME, TRUNCATING MUTATIONS (PUTATIVE DRIVER)	0	0
FBXL6	All	9	0.157895	AMPLIFICATION	5	0.0877193	DEEP DELETION	0	0	mRNA HIGH	3	0.0526316	mRNA LOW	1	0.0175439	FUSION	0	0	MISSENSE, INFRAME, TRUNCATING MUTATIONS (PUTATIVE DRIVER)	0	0
FBXL8	All	2	0.0350877	AMPLIFICATION	1	0.0175439	DEEP DELETION	0	0	mRNA HIGH	1	0.0175439	mRNA LOW	0	0	FUSION	0	0	MISSENSE, INFRAME, TRUNCATING MUTATIONS (PUTATIVE DRIVER)	0	0
FBXL12	All	3	0.0526316	AMPLIFICATION	2	0.0350877	DEEP DELETION	0	0	mRNA HIGH	1	0.0175439	mRNA LOW	0	0	FUSION	0	0	MISSENSE, INFRAME, TRUNCATING MUTATIONS (PUTATIVE DRIVER)	0	0
FBXL17	All	5	0.0877193	AMPLIFICATION	0	0	DEEP DELETION	0	0	mRNA HIGH	3	0.0526316	mRNA LOW	2	0.0350877	FUSION	0	0	MISSENSE, INFRAME, TRUNCATING MUTATIONS (PUTATIVE DRIVER)	0	0
FBXL21P	All	14	0.245614	AMPLIFICATION	1	0.0175439	DEEP DELETION	0	0	mRNA HIGH	0	0	mRNA LOW	13	0.22807	FUSION	0	0	MISSENSE, INFRAME, TRUNCATING MUTATIONS (PUTATIVE DRIVER)	0	0
FBXL22	All	3	0.0526316	AMPLIFICATION	1	0.0175439	DEEP DELETION	0	0	mRNA HIGH	1	0.0175439	mRNA LOW	1	0.0175439	FUSION	0	0	MISSENSE, INFRAME, TRUNCATING MUTATIONS (PUTATIVE DRIVER)	0	0
FBXW7	All	21	0.368421	AMPLIFICATION	0	0	DEEP DELETION	0	0	mRNA HIGH	2	0.0350877	mRNA LOW	0	0	FUSION	0	0	MISSENSE, INFRAME, TRUNCATING MUTATIONS (PUTATIVE DRIVER)	19	0.333333
FBXW11	All	5	0.0877193	AMPLIFICATION	1	0.0175439	DEEP DELETION	0	0	mRNA HIGH	2	0.0350877	mRNA LOW	2	0.0350877	FUSION	0	0	MISSENSE, INFRAME, TRUNCATING MUTATIONS (PUTATIVE DRIVER)	0	0
GABRB3	All	3	0.0526316	AMPLIFICATION	2	0.0350877	DEEP DELETION	1	0.0175439	mRNA HIGH	0	0	mRNA LOW	0	0	FUSION	0	0	MISSENSE, INFRAME, TRUNCATING MUTATIONS (PUTATIVE DRIVER)	0	0
GFPT1	All	3	0.0526316	AMPLIFICATION	1	0.0175439	DEEP DELETION	0	0	mRNA HIGH	1	0.0175439	mRNA LOW	1	0.0175439	FUSION	0	0	MISSENSE, INFRAME, TRUNCATING MUTATIONS (PUTATIVE DRIVER)	0	0
GHRH	All	4	0.0701754	AMPLIFICATION	2	0.0350877	DEEP DELETION	0	0	mRNA HIGH	2	0.0350877	mRNA LOW	0	0	FUSION	0	0	MISSENSE, INFRAME, TRUNCATING MUTATIONS (PUTATIVE DRIVER)	0	0
GHRHR	All	49	0.859649	AMPLIFICATION	0	0	DEEP DELETION	0	0	mRNA HIGH	1	0.0175439	mRNA LOW	48	0.842105	FUSION	0	0	MISSENSE, INFRAME, TRUNCATING MUTATIONS (PUTATIVE DRIVER)	0	0
GHRL	All	3	0.0526316	AMPLIFICATION	0	0	DEEP DELETION	0	0	mRNA HIGH	3	0.0526316	mRNA LOW	0	0	FUSION	0	0	MISSENSE, INFRAME, TRUNCATING MUTATIONS (PUTATIVE DRIVER)	0	0
GPR157	All	5	0.0877193	AMPLIFICATION	1	0.0175439	DEEP DELETION	0	0	mRNA HIGH	2	0.0350877	mRNA LOW	2	0.0350877	FUSION	0	0	MISSENSE, INFRAME, TRUNCATING MUTATIONS (PUTATIVE DRIVER)	0	0
GPR176	All	6	0.105263	AMPLIFICATION	0	0	DEEP DELETION	2	0.0350877	mRNA HIGH	0	0	mRNA LOW	4	0.0701754	FUSION	0	0	MISSENSE, INFRAME, TRUNCATING MUTATIONS (PUTATIVE DRIVER)	0	0
GSK3B	All	3	0.0526316	AMPLIFICATION	0	0	DEEP DELETION	0	0	mRNA HIGH	1	0.0175439	mRNA LOW	2	0.0350877	FUSION	0	0	MISSENSE, INFRAME, TRUNCATING MUTATIONS (PUTATIVE DRIVER)	0	0
HCRTR2	All	3	0.0526316	AMPLIFICATION	1	0.0175439	DEEP DELETION	0	0	mRNA HIGH	2	0.0350877	mRNA LOW	0	0	FUSION	0	0	MISSENSE, INFRAME, TRUNCATING MUTATIONS (PUTATIVE DRIVER)	0	0
HDAC1	All	2	0.0350877	AMPLIFICATION	0	0	DEEP DELETION	0	0	mRNA HIGH	0	0	mRNA LOW	1	0.0175439	FUSION	1	0.0175439	MISSENSE, INFRAME, TRUNCATING MUTATIONS (PUTATIVE DRIVER)	0	0
HDAC2	All	3	0.0526316	AMPLIFICATION	0	0	DEEP DELETION	0	0	mRNA HIGH	1	0.0175439	mRNA LOW	2	0.0350877	FUSION	0	0	MISSENSE, INFRAME, TRUNCATING MUTATIONS (PUTATIVE DRIVER)	0	0
HDAC3	All	3	0.0526316	AMPLIFICATION	1	0.0175439	DEEP DELETION	0	0	mRNA HIGH	1	0.0175439	mRNA LOW	1	0.0175439	FUSION	0	0	MISSENSE, INFRAME, TRUNCATING MUTATIONS (PUTATIVE DRIVER)	0	0
HNF1B	All	2	0.0350877	AMPLIFICATION	1	0.0175439	DEEP DELETION	0	0	mRNA HIGH	1	0.0175439	mRNA LOW	0	0	FUSION	0	0	MISSENSE, INFRAME, TRUNCATING MUTATIONS (PUTATIVE DRIVER)	0	0
HNF4A	All	7	0.122807	AMPLIFICATION	5	0.0877193	DEEP DELETION	0	0	mRNA HIGH	2	0.0350877	mRNA LOW	0	0	FUSION	0	0	MISSENSE, INFRAME, TRUNCATING MUTATIONS (PUTATIVE DRIVER)	0	0
HNRNPD	All	2	0.0350877	AMPLIFICATION	0	0	DEEP DELETION	0	0	mRNA HIGH	1	0.0175439	mRNA LOW	0	0	FUSION	1	0.0175439	MISSENSE, INFRAME, TRUNCATING MUTATIONS (PUTATIVE DRIVER)	0	0
HNRNPU	All	5	0.0877193	AMPLIFICATION	3	0.0526316	DEEP DELETION	0	0	mRNA HIGH	0	0	mRNA LOW	2	0.0350877	FUSION	0	0	MISSENSE, INFRAME, TRUNCATING MUTATIONS (PUTATIVE DRIVER)	0	0
HS3ST2	All	2	0.0350877	AMPLIFICATION	0	0	DEEP DELETION	0	0	mRNA HIGH	2	0.0350877	mRNA LOW	0	0	FUSION	0	0	MISSENSE, INFRAME, TRUNCATING MUTATIONS (PUTATIVE DRIVER)	0	0
HTR7	All	3	0.0526316	AMPLIFICATION	0	0	DEEP DELETION	0	0	mRNA HIGH	2	0.0350877	mRNA LOW	0	0	FUSION	1	0.0175439	MISSENSE, INFRAME, TRUNCATING MUTATIONS (PUTATIVE DRIVER)	0	0
HUWE1	All	2	0.0350877	AMPLIFICATION	1	0.0175439	DEEP DELETION	0	0	mRNA HIGH	1	0.0175439	mRNA LOW	0	0	FUSION	0	0	MISSENSE, INFRAME, TRUNCATING MUTATIONS (PUTATIVE DRIVER)	0	0
ID1	All	14	0.245614	AMPLIFICATION	12	0.210526	DEEP DELETION	0	0	mRNA HIGH	0	0	mRNA LOW	2	0.0350877	FUSION	0	0	MISSENSE, INFRAME, TRUNCATING MUTATIONS (PUTATIVE DRIVER)	0	0
ID2	All	7	0.122807	AMPLIFICATION	2	0.0350877	DEEP DELETION	1	0.0175439	mRNA HIGH	1	0.0175439	mRNA LOW	3	0.0526316	FUSION	0	0	MISSENSE, INFRAME, TRUNCATING MUTATIONS (PUTATIVE DRIVER)	0	0
ID3	All	3	0.0526316	AMPLIFICATION	1	0.0175439	DEEP DELETION	0	0	mRNA HIGH	0	0	mRNA LOW	2	0.0350877	FUSION	0	0	MISSENSE, INFRAME, TRUNCATING MUTATIONS (PUTATIVE DRIVER)	0	0
ID4	All	6	0.105263	AMPLIFICATION	3	0.0526316	DEEP DELETION	0	0	mRNA HIGH	1	0.0175439	mRNA LOW	2	0.0350877	FUSION	0	0	MISSENSE, INFRAME, TRUNCATING MUTATIONS (PUTATIVE DRIVER)	0	0
IL6	All	4	0.0701754	AMPLIFICATION	1	0.0175439	DEEP DELETION	0	0	mRNA HIGH	2	0.0350877	mRNA LOW	1	0.0175439	FUSION	0	0	MISSENSE, INFRAME, TRUNCATING MUTATIONS (PUTATIVE DRIVER)	0	0
IMPDH2	All	3	0.0526316	AMPLIFICATION	0	0	DEEP DELETION	1	0.0175439	mRNA HIGH	2	0.0350877	mRNA LOW	0	0	FUSION	0	0	MISSENSE, INFRAME, TRUNCATING MUTATIONS (PUTATIVE DRIVER)	0	0
KCNA2	All	1	0.0175439	AMPLIFICATION	0	0	DEEP DELETION	0	0	mRNA HIGH	1	0.0175439	mRNA LOW	0	0	FUSION	0	0	MISSENSE, INFRAME, TRUNCATING MUTATIONS (PUTATIVE DRIVER)	0	0
KCND2	All	5	0.0877193	AMPLIFICATION	1	0.0175439	DEEP DELETION	0	0	mRNA HIGH	2	0.0350877	mRNA LOW	2	0.0350877	FUSION	0	0	MISSENSE, INFRAME, TRUNCATING MUTATIONS (PUTATIVE DRIVER)	0	0
KCNMA1	All	5	0.0877193	AMPLIFICATION	4	0.0701754	DEEP DELETION	0	0	mRNA HIGH	0	0	mRNA LOW	1	0.0175439	FUSION	0	0	MISSENSE, INFRAME, TRUNCATING MUTATIONS (PUTATIVE DRIVER)	0	0
KDM2A	All	4	0.0701754	AMPLIFICATION	1	0.0175439	DEEP DELETION	0	0	mRNA HIGH	1	0.0175439	mRNA LOW	1	0.0175439	FUSION	1	0.0175439	MISSENSE, INFRAME, TRUNCATING MUTATIONS (PUTATIVE DRIVER)	0	0
KDM5A	All	9	0.157895	AMPLIFICATION	4	0.0701754	DEEP DELETION	1	0.0175439	mRNA HIGH	2	0.0350877	mRNA LOW	2	0.0350877	FUSION	0	0	MISSENSE, INFRAME, TRUNCATING MUTATIONS (PUTATIVE DRIVER)	0	0
KDM5B	All	3	0.0526316	AMPLIFICATION	0	0	DEEP DELETION	0	0	mRNA HIGH	0	0	mRNA LOW	3	0.0526316	FUSION	0	0	MISSENSE, INFRAME, TRUNCATING MUTATIONS (PUTATIVE DRIVER)	0	0
KDM5C	All	6	0.105263	AMPLIFICATION	1	0.0175439	DEEP DELETION	0	0	mRNA HIGH	2	0.0350877	mRNA LOW	2	0.0350877	FUSION	0	0	MISSENSE, INFRAME, TRUNCATING MUTATIONS (PUTATIVE DRIVER)	1	0.0175439
KDM8	All	4	0.0701754	AMPLIFICATION	0	0	DEEP DELETION	0	0	mRNA HIGH	2	0.0350877	mRNA LOW	2	0.0350877	FUSION	0	0	MISSENSE, INFRAME, TRUNCATING MUTATIONS (PUTATIVE DRIVER)	0	0
KLF10	All	12	0.210526	AMPLIFICATION	7	0.122807	DEEP DELETION	0	0	mRNA HIGH	2	0.0350877	mRNA LOW	3	0.0526316	FUSION	0	0	MISSENSE, INFRAME, TRUNCATING MUTATIONS (PUTATIVE DRIVER)	0	0
KMT2A	All	7	0.122807	AMPLIFICATION	3	0.0526316	DEEP DELETION	1	0.0175439	mRNA HIGH	2	0.0350877	mRNA LOW	1	0.0175439	FUSION	0	0	MISSENSE, INFRAME, TRUNCATING MUTATIONS (PUTATIVE DRIVER)	0	0
LEPR	All	1	0.0175439	AMPLIFICATION	0	0	DEEP DELETION	0	0	mRNA HIGH	1	0.0175439	mRNA LOW	0	0	FUSION	0	0	MISSENSE, INFRAME, TRUNCATING MUTATIONS (PUTATIVE DRIVER)	0	0
LGR4	All	4	0.0701754	AMPLIFICATION	1	0.0175439	DEEP DELETION	0	0	mRNA HIGH	1	0.0175439	mRNA LOW	2	0.0350877	FUSION	0	0	MISSENSE, INFRAME, TRUNCATING MUTATIONS (PUTATIVE DRIVER)	0	0
MAGED1	All	3	0.0526316	AMPLIFICATION	1	0.0175439	DEEP DELETION	0	0	mRNA HIGH	2	0.0350877	mRNA LOW	0	0	FUSION	0	0	MISSENSE, INFRAME, TRUNCATING MUTATIONS (PUTATIVE DRIVER)	0	0
MAGEL2	All	8	0.140351	AMPLIFICATION	2	0.0350877	DEEP DELETION	1	0.0175439	mRNA HIGH	0	0	mRNA LOW	5	0.0877193	FUSION	0	0	MISSENSE, INFRAME, TRUNCATING MUTATIONS (PUTATIVE DRIVER)	0	0
MAPK8	All	3	0.0526316	AMPLIFICATION	0	0	DEEP DELETION	0	0	mRNA HIGH	0	0	mRNA LOW	3	0.0526316	FUSION	0	0	MISSENSE, INFRAME, TRUNCATING MUTATIONS (PUTATIVE DRIVER)	0	0
MAPK9	All	3	0.0526316	AMPLIFICATION	1	0.0175439	DEEP DELETION	0	0	mRNA HIGH	1	0.0175439	mRNA LOW	1	0.0175439	FUSION	0	0	MISSENSE, INFRAME, TRUNCATING MUTATIONS (PUTATIVE DRIVER)	0	0
MAPK10	All	4	0.0701754	AMPLIFICATION	0	0	DEEP DELETION	0	0	mRNA HIGH	0	0	mRNA LOW	3	0.0526316	FUSION	1	0.0175439	MISSENSE, INFRAME, TRUNCATING MUTATIONS (PUTATIVE DRIVER)	0	0
MAT2A	All	6	0.105263	AMPLIFICATION	2	0.0350877	DEEP DELETION	0	0	mRNA HIGH	1	0.0175439	mRNA LOW	3	0.0526316	FUSION	0	0	MISSENSE, INFRAME, TRUNCATING MUTATIONS (PUTATIVE DRIVER)	0	0
MC3R	All	3	0.0526316	AMPLIFICATION	2	0.0350877	DEEP DELETION	0	0	mRNA HIGH	1	0.0175439	mRNA LOW	0	0	FUSION	0	0	MISSENSE, INFRAME, TRUNCATING MUTATIONS (PUTATIVE DRIVER)	0	0
METTL3	All	5	0.0877193	AMPLIFICATION	0	0	DEEP DELETION	0	0	mRNA HIGH	1	0.0175439	mRNA LOW	4	0.0701754	FUSION	0	0	MISSENSE, INFRAME, TRUNCATING MUTATIONS (PUTATIVE DRIVER)	0	0
MTA1	All	5	0.0877193	AMPLIFICATION	0	0	DEEP DELETION	1	0.0175439	mRNA HIGH	1	0.0175439	mRNA LOW	3	0.0526316	FUSION	0	0	MISSENSE, INFRAME, TRUNCATING MUTATIONS (PUTATIVE DRIVER)	0	0
MTNR1A	All	4	0.0701754	AMPLIFICATION	0	0	DEEP DELETION	2	0.0350877	mRNA HIGH	2	0.0350877	mRNA LOW	0	0	FUSION	0	0	MISSENSE, INFRAME, TRUNCATING MUTATIONS (PUTATIVE DRIVER)	0	0
MTNR1B	All	47	0.824561	AMPLIFICATION	0	0	DEEP DELETION	0	0	mRNA HIGH	1	0.0175439	mRNA LOW	46	0.807018	FUSION	0	0	MISSENSE, INFRAME, TRUNCATING MUTATIONS (PUTATIVE DRIVER)	0	0
MTOR	All	3	0.0526316	AMPLIFICATION	0	0	DEEP DELETION	0	0	mRNA HIGH	1	0.0175439	mRNA LOW	1	0.0175439	FUSION	1	0.0175439	MISSENSE, INFRAME, TRUNCATING MUTATIONS (PUTATIVE DRIVER)	0	0
SLC25A19	All	2	0.0350877	AMPLIFICATION	1	0.0175439	DEEP DELETION	0	0	mRNA HIGH	1	0.0175439	mRNA LOW	0	0	FUSION	0	0	MISSENSE, INFRAME, TRUNCATING MUTATIONS (PUTATIVE DRIVER)	0	0
MYBBP1A	All	5	0.0877193	AMPLIFICATION	1	0.0175439	DEEP DELETION	0	0	mRNA HIGH	3	0.0526316	mRNA LOW	1	0.0175439	FUSION	0	0	MISSENSE, INFRAME, TRUNCATING MUTATIONS (PUTATIVE DRIVER)	0	0
MYCBP2	All	10	0.175439	AMPLIFICATION	4	0.0701754	DEEP DELETION	1	0.0175439	mRNA HIGH	1	0.0175439	mRNA LOW	4	0.0701754	FUSION	0	0	MISSENSE, INFRAME, TRUNCATING MUTATIONS (PUTATIVE DRIVER)	0	0
NAGLU	All	3	0.0526316	AMPLIFICATION	0	0	DEEP DELETION	0	0	mRNA HIGH	2	0.0350877	mRNA LOW	1	0.0175439	FUSION	0	0	MISSENSE, INFRAME, TRUNCATING MUTATIONS (PUTATIVE DRIVER)	0	0
NAMPT	All	4	0.0701754	AMPLIFICATION	1	0.0175439	DEEP DELETION	0	0	mRNA HIGH	3	0.0526316	mRNA LOW	0	0	FUSION	0	0	MISSENSE, INFRAME, TRUNCATING MUTATIONS (PUTATIVE DRIVER)	0	0
NCOA2	All	7	0.122807	AMPLIFICATION	5	0.0877193	DEEP DELETION	0	0	mRNA HIGH	0	0	mRNA LOW	2	0.0350877	FUSION	0	0	MISSENSE, INFRAME, TRUNCATING MUTATIONS (PUTATIVE DRIVER)	0	0
NCOR1	All	6	0.105263	AMPLIFICATION	1	0.0175439	DEEP DELETION	1	0.0175439	mRNA HIGH	1	0.0175439	mRNA LOW	2	0.0350877	FUSION	1	0.0175439	MISSENSE, INFRAME, TRUNCATING MUTATIONS (PUTATIVE DRIVER)	0	0
NDUFA9	All	6	0.105263	AMPLIFICATION	4	0.0701754	DEEP DELETION	0	0	mRNA HIGH	1	0.0175439	mRNA LOW	1	0.0175439	FUSION	0	0	MISSENSE, INFRAME, TRUNCATING MUTATIONS (PUTATIVE DRIVER)	0	0
NFIL3	All	2	0.0350877	AMPLIFICATION	0	0	DEEP DELETION	0	0	mRNA HIGH	0	0	mRNA LOW	2	0.0350877	FUSION	0	0	MISSENSE, INFRAME, TRUNCATING MUTATIONS (PUTATIVE DRIVER)	0	0
NGFR	All	5	0.0877193	AMPLIFICATION	2	0.0350877	DEEP DELETION	0	0	mRNA HIGH	0	0	mRNA LOW	3	0.0526316	FUSION	0	0	MISSENSE, INFRAME, TRUNCATING MUTATIONS (PUTATIVE DRIVER)	0	0
NKX2-1	All	2	0.0350877	AMPLIFICATION	0	0	DEEP DELETION	0	0	mRNA HIGH	2	0.0350877	mRNA LOW	0	0	FUSION	0	0	MISSENSE, INFRAME, TRUNCATING MUTATIONS (PUTATIVE DRIVER)	0	0
NLGN1	All	11	0.192982	AMPLIFICATION	7	0.122807	DEEP DELETION	0	0	mRNA HIGH	0	0	mRNA LOW	4	0.0701754	FUSION	0	0	MISSENSE, INFRAME, TRUNCATING MUTATIONS (PUTATIVE DRIVER)	0	0
NMS	All	0	0	AMPLIFICATION	0	0	DEEP DELETION	0	0	mRNA HIGH	0	0	mRNA LOW	0	0	FUSION	0	0	MISSENSE, INFRAME, TRUNCATING MUTATIONS (PUTATIVE DRIVER)	0	0
NMU	All	4	0.0701754	AMPLIFICATION	0	0	DEEP DELETION	0	0	mRNA HIGH	1	0.0175439	mRNA LOW	3	0.0526316	FUSION	0	0	MISSENSE, INFRAME, TRUNCATING MUTATIONS (PUTATIVE DRIVER)	0	0
NOCT	All	2	0.0350877	AMPLIFICATION	0	0	DEEP DELETION	0	0	mRNA HIGH	0	0	mRNA LOW	2	0.0350877	FUSION	0	0	MISSENSE, INFRAME, TRUNCATING MUTATIONS (PUTATIVE DRIVER)	0	0
NONO	All	4	0.0701754	AMPLIFICATION	1	0.0175439	DEEP DELETION	0	0	mRNA HIGH	2	0.0350877	mRNA LOW	1	0.0175439	FUSION	0	0	MISSENSE, INFRAME, TRUNCATING MUTATIONS (PUTATIVE DRIVER)	0	0
NPAS2	All	4	0.0701754	AMPLIFICATION	1	0.0175439	DEEP DELETION	0	0	mRNA HIGH	0	0	mRNA LOW	3	0.0526316	FUSION	0	0	MISSENSE, INFRAME, TRUNCATING MUTATIONS (PUTATIVE DRIVER)	0	0
NPS	All	0	0	AMPLIFICATION	0	0	DEEP DELETION	0	0	mRNA HIGH	0	0	mRNA LOW	0	0	FUSION	0	0	MISSENSE, INFRAME, TRUNCATING MUTATIONS (PUTATIVE DRIVER)	0	0
NPY2R	All	3	0.0526316	AMPLIFICATION	0	0	DEEP DELETION	0	0	mRNA HIGH	3	0.0526316	mRNA LOW	0	0	FUSION	0	0	MISSENSE, INFRAME, TRUNCATING MUTATIONS (PUTATIVE DRIVER)	0	0
NR0B2	All	3	0.0526316	AMPLIFICATION	0	0	DEEP DELETION	0	0	mRNA HIGH	2	0.0350877	mRNA LOW	0	0	FUSION	1	0.0175439	MISSENSE, INFRAME, TRUNCATING MUTATIONS (PUTATIVE DRIVER)	0	0
NR1D1	All	6	0.105263	AMPLIFICATION	3	0.0526316	DEEP DELETION	0	0	mRNA HIGH	2	0.0350877	mRNA LOW	1	0.0175439	FUSION	0	0	MISSENSE, INFRAME, TRUNCATING MUTATIONS (PUTATIVE DRIVER)	0	0
NR1D2	All	2	0.0350877	AMPLIFICATION	0	0	DEEP DELETION	0	0	mRNA HIGH	0	0	mRNA LOW	2	0.0350877	FUSION	0	0	MISSENSE, INFRAME, TRUNCATING MUTATIONS (PUTATIVE DRIVER)	0	0
NR2F6	All	4	0.0701754	AMPLIFICATION	2	0.0350877	DEEP DELETION	0	0	mRNA HIGH	1	0.0175439	mRNA LOW	1	0.0175439	FUSION	0	0	MISSENSE, INFRAME, TRUNCATING MUTATIONS (PUTATIVE DRIVER)	0	0
NRIP1	All	6	0.105263	AMPLIFICATION	1	0.0175439	DEEP DELETION	1	0.0175439	mRNA HIGH	0	0	mRNA LOW	4	0.0701754	FUSION	0	0	MISSENSE, INFRAME, TRUNCATING MUTATIONS (PUTATIVE DRIVER)	0	0
OGT	All	3	0.0526316	AMPLIFICATION	1	0.0175439	DEEP DELETION	0	0	mRNA HIGH	1	0.0175439	mRNA LOW	1	0.0175439	FUSION	0	0	MISSENSE, INFRAME, TRUNCATING MUTATIONS (PUTATIVE DRIVER)	0	0
OPN4	All	1	0.0175439	AMPLIFICATION	0	0	DEEP DELETION	0	0	mRNA HIGH	1	0.0175439	mRNA LOW	0	0	FUSION	0	0	MISSENSE, INFRAME, TRUNCATING MUTATIONS (PUTATIVE DRIVER)	0	0
OPN5	All	2	0.0350877	AMPLIFICATION	0	0	DEEP DELETION	0	0	mRNA HIGH	2	0.0350877	mRNA LOW	0	0	FUSION	0	0	MISSENSE, INFRAME, TRUNCATING MUTATIONS (PUTATIVE DRIVER)	0	0
OPRL1	All	8	0.140351	AMPLIFICATION	6	0.105263	DEEP DELETION	0	0	mRNA HIGH	0	0	mRNA LOW	2	0.0350877	FUSION	0	0	MISSENSE, INFRAME, TRUNCATING MUTATIONS (PUTATIVE DRIVER)	0	0
PDE6B	All	3	0.0526316	AMPLIFICATION	0	0	DEEP DELETION	0	0	mRNA HIGH	1	0.0175439	mRNA LOW	2	0.0350877	FUSION	0	0	MISSENSE, INFRAME, TRUNCATING MUTATIONS (PUTATIVE DRIVER)	0	0
PER1	All	3	0.0526316	AMPLIFICATION	1	0.0175439	DEEP DELETION	0	0	mRNA HIGH	2	0.0350877	mRNA LOW	0	0	FUSION	0	0	MISSENSE, INFRAME, TRUNCATING MUTATIONS (PUTATIVE DRIVER)	0	0
PER2	All	3	0.0526316	AMPLIFICATION	2	0.0350877	DEEP DELETION	0	0	mRNA HIGH	1	0.0175439	mRNA LOW	0	0	FUSION	0	0	MISSENSE, INFRAME, TRUNCATING MUTATIONS (PUTATIVE DRIVER)	0	0
PER3	All	4	0.0701754	AMPLIFICATION	1	0.0175439	DEEP DELETION	0	0	mRNA HIGH	1	0.0175439	mRNA LOW	2	0.0350877	FUSION	0	0	MISSENSE, INFRAME, TRUNCATING MUTATIONS (PUTATIVE DRIVER)	0	0
PHLPP1	All	3	0.0526316	AMPLIFICATION	0	0	DEEP DELETION	0	0	mRNA HIGH	0	0	mRNA LOW	3	0.0526316	FUSION	0	0	MISSENSE, INFRAME, TRUNCATING MUTATIONS (PUTATIVE DRIVER)	0	0
PIWIL2	All	14	0.245614	AMPLIFICATION	1	0.0175439	DEEP DELETION	2	0.0350877	mRNA HIGH	2	0.0350877	mRNA LOW	9	0.157895	FUSION	0	0	MISSENSE, INFRAME, TRUNCATING MUTATIONS (PUTATIVE DRIVER)	0	0
PMCH	All	2	0.0350877	AMPLIFICATION	0	0	DEEP DELETION	0	0	mRNA HIGH	2	0.0350877	mRNA LOW	0	0	FUSION	0	0	MISSENSE, INFRAME, TRUNCATING MUTATIONS (PUTATIVE DRIVER)	0	0
PML	All	4	0.0701754	AMPLIFICATION	2	0.0350877	DEEP DELETION	0	0	mRNA HIGH	1	0.0175439	mRNA LOW	1	0.0175439	FUSION	0	0	MISSENSE, INFRAME, TRUNCATING MUTATIONS (PUTATIVE DRIVER)	0	0
PPARA	All	3	0.0526316	AMPLIFICATION	0	0	DEEP DELETION	1	0.0175439	mRNA HIGH	1	0.0175439	mRNA LOW	1	0.0175439	FUSION	0	0	MISSENSE, INFRAME, TRUNCATING MUTATIONS (PUTATIVE DRIVER)	0	0
PPARG	All	3	0.0526316	AMPLIFICATION	0	0	DEEP DELETION	0	0	mRNA HIGH	2	0.0350877	mRNA LOW	1	0.0175439	FUSION	0	0	MISSENSE, INFRAME, TRUNCATING MUTATIONS (PUTATIVE DRIVER)	0	0
PPARGC1A	All	4	0.0701754	AMPLIFICATION	0	0	DEEP DELETION	0	0	mRNA HIGH	0	0	mRNA LOW	4	0.0701754	FUSION	0	0	MISSENSE, INFRAME, TRUNCATING MUTATIONS (PUTATIVE DRIVER)	0	0
PPP1CA	All	4	0.0701754	AMPLIFICATION	1	0.0175439	DEEP DELETION	0	0	mRNA HIGH	3	0.0526316	mRNA LOW	0	0	FUSION	0	0	MISSENSE, INFRAME, TRUNCATING MUTATIONS (PUTATIVE DRIVER)	0	0
PPP1CB	All	6	0.105263	AMPLIFICATION	3	0.0526316	DEEP DELETION	0	0	mRNA HIGH	2	0.0350877	mRNA LOW	1	0.0175439	FUSION	0	0	MISSENSE, INFRAME, TRUNCATING MUTATIONS (PUTATIVE DRIVER)	0	0
PPP1CC	All	3	0.0526316	AMPLIFICATION	0	0	DEEP DELETION	0	0	mRNA HIGH	1	0.0175439	mRNA LOW	2	0.0350877	FUSION	0	0	MISSENSE, INFRAME, TRUNCATING MUTATIONS (PUTATIVE DRIVER)	0	0
PRF1	All	3	0.0526316	AMPLIFICATION	0	0	DEEP DELETION	0	0	mRNA HIGH	2	0.0350877	mRNA LOW	1	0.0175439	FUSION	0	0	MISSENSE, INFRAME, TRUNCATING MUTATIONS (PUTATIVE DRIVER)	0	0
PRKAA1	All	4	0.0701754	AMPLIFICATION	1	0.0175439	DEEP DELETION	0	0	mRNA HIGH	1	0.0175439	mRNA LOW	2	0.0350877	FUSION	0	0	MISSENSE, INFRAME, TRUNCATING MUTATIONS (PUTATIVE DRIVER)	0	0
PRKAA2	All	1	0.0175439	AMPLIFICATION	0	0	DEEP DELETION	0	0	mRNA HIGH	0	0	mRNA LOW	1	0.0175439	FUSION	0	0	MISSENSE, INFRAME, TRUNCATING MUTATIONS (PUTATIVE DRIVER)	0	0
PRKCG	All	5	0.0877193	AMPLIFICATION	3	0.0526316	DEEP DELETION	0	0	mRNA HIGH	2	0.0350877	mRNA LOW	0	0	FUSION	0	0	MISSENSE, INFRAME, TRUNCATING MUTATIONS (PUTATIVE DRIVER)	0	0
PRKDC	All	12	0.210526	AMPLIFICATION	8	0.140351	DEEP DELETION	1	0.0175439	mRNA HIGH	1	0.0175439	mRNA LOW	2	0.0350877	FUSION	0	0	MISSENSE, INFRAME, TRUNCATING MUTATIONS (PUTATIVE DRIVER)	0	0
PRKG1	All	4	0.0701754	AMPLIFICATION	2	0.0350877	DEEP DELETION	0	0	mRNA HIGH	1	0.0175439	mRNA LOW	1	0.0175439	FUSION	0	0	MISSENSE, INFRAME, TRUNCATING MUTATIONS (PUTATIVE DRIVER)	0	0
PRKG2	All	5	0.0877193	AMPLIFICATION	0	0	DEEP DELETION	0	0	mRNA HIGH	2	0.0350877	mRNA LOW	3	0.0526316	FUSION	0	0	MISSENSE, INFRAME, TRUNCATING MUTATIONS (PUTATIVE DRIVER)	0	0
PRMT5	All	4	0.0701754	AMPLIFICATION	1	0.0175439	DEEP DELETION	0	0	mRNA HIGH	0	0	mRNA LOW	3	0.0526316	FUSION	0	0	MISSENSE, INFRAME, TRUNCATING MUTATIONS (PUTATIVE DRIVER)	0	0
PROK1	All	2	0.0350877	AMPLIFICATION	0	0	DEEP DELETION	0	0	mRNA HIGH	2	0.0350877	mRNA LOW	0	0	FUSION	0	0	MISSENSE, INFRAME, TRUNCATING MUTATIONS (PUTATIVE DRIVER)	0	0
PROK2	All	8	0.140351	AMPLIFICATION	3	0.0526316	DEEP DELETION	0	0	mRNA HIGH	3	0.0526316	mRNA LOW	2	0.0350877	FUSION	0	0	MISSENSE, INFRAME, TRUNCATING MUTATIONS (PUTATIVE DRIVER)	0	0
PROKR1	All	1	0.0175439	AMPLIFICATION	0	0	DEEP DELETION	0	0	mRNA HIGH	1	0.0175439	mRNA LOW	0	0	FUSION	0	0	MISSENSE, INFRAME, TRUNCATING MUTATIONS (PUTATIVE DRIVER)	0	0
PROKR2	All	1	0.0175439	AMPLIFICATION	0	0	DEEP DELETION	0	0	mRNA HIGH	1	0.0175439	mRNA LOW	0	0	FUSION	0	0	MISSENSE, INFRAME, TRUNCATING MUTATIONS (PUTATIVE DRIVER)	0	0
PROX1	All	8	0.140351	AMPLIFICATION	2	0.0350877	DEEP DELETION	1	0.0175439	mRNA HIGH	2	0.0350877	mRNA LOW	3	0.0526316	FUSION	0	0	MISSENSE, INFRAME, TRUNCATING MUTATIONS (PUTATIVE DRIVER)	0	0
PSPC1	All	4	0.0701754	AMPLIFICATION	3	0.0526316	DEEP DELETION	0	0	mRNA HIGH	1	0.0175439	mRNA LOW	0	0	FUSION	0	0	MISSENSE, INFRAME, TRUNCATING MUTATIONS (PUTATIVE DRIVER)	0	0
PTEN	All	13	0.22807	AMPLIFICATION	0	0	DEEP DELETION	1	0.0175439	mRNA HIGH	0	0	mRNA LOW	1	0.0175439	FUSION	0	0	MISSENSE, INFRAME, TRUNCATING MUTATIONS (PUTATIVE DRIVER)	11	0.192982
PTGDS	All	1	0.0175439	AMPLIFICATION	1	0.0175439	DEEP DELETION	0	0	mRNA HIGH	0	0	mRNA LOW	0	0	FUSION	0	0	MISSENSE, INFRAME, TRUNCATING MUTATIONS (PUTATIVE DRIVER)	0	0
PTGER3	All	3	0.0526316	AMPLIFICATION	0	0	DEEP DELETION	0	0	mRNA HIGH	3	0.0526316	mRNA LOW	0	0	FUSION	0	0	MISSENSE, INFRAME, TRUNCATING MUTATIONS (PUTATIVE DRIVER)	0	0
PTGER4	All	3	0.0526316	AMPLIFICATION	1	0.0175439	DEEP DELETION	0	0	mRNA HIGH	0	0	mRNA LOW	2	0.0350877	FUSION	0	0	MISSENSE, INFRAME, TRUNCATING MUTATIONS (PUTATIVE DRIVER)	0	0
RAI1	All	6	0.105263	AMPLIFICATION	2	0.0350877	DEEP DELETION	0	0	mRNA HIGH	4	0.0701754	mRNA LOW	0	0	FUSION	0	0	MISSENSE, INFRAME, TRUNCATING MUTATIONS (PUTATIVE DRIVER)	0	0
RBM4	All	2	0.0350877	AMPLIFICATION	0	0	DEEP DELETION	0	0	mRNA HIGH	1	0.0175439	mRNA LOW	1	0.0175439	FUSION	0	0	MISSENSE, INFRAME, TRUNCATING MUTATIONS (PUTATIVE DRIVER)	0	0
RBM4B	All	2	0.0350877	AMPLIFICATION	0	0	DEEP DELETION	0	0	mRNA HIGH	0	0	mRNA LOW	2	0.0350877	FUSION	0	0	MISSENSE, INFRAME, TRUNCATING MUTATIONS (PUTATIVE DRIVER)	0	0
RELB	All	7	0.122807	AMPLIFICATION	5	0.0877193	DEEP DELETION	0	0	mRNA HIGH	2	0.0350877	mRNA LOW	0	0	FUSION	0	0	MISSENSE, INFRAME, TRUNCATING MUTATIONS (PUTATIVE DRIVER)	0	0
ROCK2	All	6	0.105263	AMPLIFICATION	2	0.0350877	DEEP DELETION	1	0.0175439	mRNA HIGH	0	0	mRNA LOW	3	0.0526316	FUSION	0	0	MISSENSE, INFRAME, TRUNCATING MUTATIONS (PUTATIVE DRIVER)	0	0
RORA	All	3	0.0526316	AMPLIFICATION	0	0	DEEP DELETION	0	0	mRNA HIGH	1	0.0175439	mRNA LOW	2	0.0350877	FUSION	0	0	MISSENSE, INFRAME, TRUNCATING MUTATIONS (PUTATIVE DRIVER)	0	0
RORB	All	3	0.0526316	AMPLIFICATION	0	0	DEEP DELETION	0	0	mRNA HIGH	3	0.0526316	mRNA LOW	0	0	FUSION	0	0	MISSENSE, INFRAME, TRUNCATING MUTATIONS (PUTATIVE DRIVER)	0	0
RORC	All	5	0.0877193	AMPLIFICATION	4	0.0701754	DEEP DELETION	0	0	mRNA HIGH	0	0	mRNA LOW	1	0.0175439	FUSION	0	0	MISSENSE, INFRAME, TRUNCATING MUTATIONS (PUTATIVE DRIVER)	0	0
SETX	All	2	0.0350877	AMPLIFICATION	0	0	DEEP DELETION	0	0	mRNA HIGH	1	0.0175439	mRNA LOW	1	0.0175439	FUSION	0	0	MISSENSE, INFRAME, TRUNCATING MUTATIONS (PUTATIVE DRIVER)	0	0
SFPQ	All	1	0.0175439	AMPLIFICATION	1	0.0175439	DEEP DELETION	0	0	mRNA HIGH	0	0	mRNA LOW	0	0	FUSION	0	0	MISSENSE, INFRAME, TRUNCATING MUTATIONS (PUTATIVE DRIVER)	0	0
SIAH2	All	3	0.0526316	AMPLIFICATION	1	0.0175439	DEEP DELETION	0	0	mRNA HIGH	1	0.0175439	mRNA LOW	1	0.0175439	FUSION	0	0	MISSENSE, INFRAME, TRUNCATING MUTATIONS (PUTATIVE DRIVER)	0	0
SIK1	All	4	0.0701754	AMPLIFICATION	2	0.0350877	DEEP DELETION	0	0	mRNA HIGH	2	0.0350877	mRNA LOW	0	0	FUSION	0	0	MISSENSE, INFRAME, TRUNCATING MUTATIONS (PUTATIVE DRIVER)	0	0
SIN3A	All	5	0.0877193	AMPLIFICATION	2	0.0350877	DEEP DELETION	0	0	mRNA HIGH	2	0.0350877	mRNA LOW	1	0.0175439	FUSION	0	0	MISSENSE, INFRAME, TRUNCATING MUTATIONS (PUTATIVE DRIVER)	0	0
SIRT1	All	5	0.0877193	AMPLIFICATION	1	0.0175439	DEEP DELETION	0	0	mRNA HIGH	0	0	mRNA LOW	4	0.0701754	FUSION	0	0	MISSENSE, INFRAME, TRUNCATING MUTATIONS (PUTATIVE DRIVER)	0	0
SIX3	All	1	0.0175439	AMPLIFICATION	0	0	DEEP DELETION	0	0	mRNA HIGH	1	0.0175439	mRNA LOW	0	0	FUSION	0	0	MISSENSE, INFRAME, TRUNCATING MUTATIONS (PUTATIVE DRIVER)	0	0
SLC6A4	All	4	0.0701754	AMPLIFICATION	0	0	DEEP DELETION	0	0	mRNA HIGH	4	0.0701754	mRNA LOW	0	0	FUSION	0	0	MISSENSE, INFRAME, TRUNCATING MUTATIONS (PUTATIVE DRIVER)	0	0
SOX14	All	2	0.0350877	AMPLIFICATION	1	0.0175439	DEEP DELETION	0	0	mRNA HIGH	1	0.0175439	mRNA LOW	0	0	FUSION	0	0	MISSENSE, INFRAME, TRUNCATING MUTATIONS (PUTATIVE DRIVER)	0	0
SPSB4	All	3	0.0526316	AMPLIFICATION	1	0.0175439	DEEP DELETION	0	0	mRNA HIGH	0	0	mRNA LOW	2	0.0350877	FUSION	0	0	MISSENSE, INFRAME, TRUNCATING MUTATIONS (PUTATIVE DRIVER)	0	0
SRRD	All	2	0.0350877	AMPLIFICATION	1	0.0175439	DEEP DELETION	0	0	mRNA HIGH	0	0	mRNA LOW	1	0.0175439	FUSION	0	0	MISSENSE, INFRAME, TRUNCATING MUTATIONS (PUTATIVE DRIVER)	0	0
SUV39H1	All	4	0.0701754	AMPLIFICATION	1	0.0175439	DEEP DELETION	0	0	mRNA HIGH	3	0.0526316	mRNA LOW	0	0	FUSION	0	0	MISSENSE, INFRAME, TRUNCATING MUTATIONS (PUTATIVE DRIVER)	0	0
SUV39H2	All	4	0.0701754	AMPLIFICATION	2	0.0350877	DEEP DELETION	0	0	mRNA HIGH	0	0	mRNA LOW	2	0.0350877	FUSION	0	0	MISSENSE, INFRAME, TRUNCATING MUTATIONS (PUTATIVE DRIVER)	0	0
TARDBP	All	1	0.0175439	AMPLIFICATION	0	0	DEEP DELETION	0	0	mRNA HIGH	1	0.0175439	mRNA LOW	0	0	FUSION	0	0	MISSENSE, INFRAME, TRUNCATING MUTATIONS (PUTATIVE DRIVER)	0	0
THRAP3	All	8	0.140351	AMPLIFICATION	4	0.0701754	DEEP DELETION	0	0	mRNA HIGH	1	0.0175439	mRNA LOW	3	0.0526316	FUSION	0	0	MISSENSE, INFRAME, TRUNCATING MUTATIONS (PUTATIVE DRIVER)	0	0
TIMELESS	All	2	0.0350877	AMPLIFICATION	1	0.0175439	DEEP DELETION	0	0	mRNA HIGH	0	0	mRNA LOW	1	0.0175439	FUSION	0	0	MISSENSE, INFRAME, TRUNCATING MUTATIONS (PUTATIVE DRIVER)	0	0
TNFRSF11A	All	3	0.0526316	AMPLIFICATION	0	0	DEEP DELETION	0	0	mRNA HIGH	2	0.0350877	mRNA LOW	1	0.0175439	FUSION	0	0	MISSENSE, INFRAME, TRUNCATING MUTATIONS (PUTATIVE DRIVER)	0	0
TOP1	All	6	0.105263	AMPLIFICATION	3	0.0526316	DEEP DELETION	1	0.0175439	mRNA HIGH	1	0.0175439	mRNA LOW	1	0.0175439	FUSION	0	0	MISSENSE, INFRAME, TRUNCATING MUTATIONS (PUTATIVE DRIVER)	0	0
TOP2A	All	4	0.0701754	AMPLIFICATION	2	0.0350877	DEEP DELETION	0	0	mRNA HIGH	2	0.0350877	mRNA LOW	0	0	FUSION	0	0	MISSENSE, INFRAME, TRUNCATING MUTATIONS (PUTATIVE DRIVER)	0	0
TP53	All	57	1	AMPLIFICATION	1	0.0175439	DEEP DELETION	0	0	mRNA HIGH	0	0	mRNA LOW	4	0.0701754	FUSION	0	0	MISSENSE, INFRAME, TRUNCATING MUTATIONS (PUTATIVE DRIVER)	52	0.912281
UBE3A	All	4	0.0701754	AMPLIFICATION	1	0.0175439	DEEP DELETION	2	0.0350877	mRNA HIGH	0	0	mRNA LOW	1	0.0175439	FUSION	0	0	MISSENSE, INFRAME, TRUNCATING MUTATIONS (PUTATIVE DRIVER)	0	0
USP2	All	5	0.0877193	AMPLIFICATION	1	0.0175439	DEEP DELETION	1	0.0175439	mRNA HIGH	2	0.0350877	mRNA LOW	1	0.0175439	FUSION	0	0	MISSENSE, INFRAME, TRUNCATING MUTATIONS (PUTATIVE DRIVER)	0	0
USP7	All	5	0.0877193	AMPLIFICATION	2	0.0350877	DEEP DELETION	0	0	mRNA HIGH	1	0.0175439	mRNA LOW	2	0.0350877	FUSION	0	0	MISSENSE, INFRAME, TRUNCATING MUTATIONS (PUTATIVE DRIVER)	0	0
USP9X	All	5	0.0877193	AMPLIFICATION	1	0.0175439	DEEP DELETION	1	0.0175439	mRNA HIGH	3	0.0526316	mRNA LOW	0	0	FUSION	0	0	MISSENSE, INFRAME, TRUNCATING MUTATIONS (PUTATIVE DRIVER)	0	0
UTS2	All	3	0.0526316	AMPLIFICATION	1	0.0175439	DEEP DELETION	0	0	mRNA HIGH	2	0.0350877	mRNA LOW	0	0	FUSION	0	0	MISSENSE, INFRAME, TRUNCATING MUTATIONS (PUTATIVE DRIVER)	0	0
UTS2R	All	3	0.0526316	AMPLIFICATION	2	0.0350877	DEEP DELETION	0	0	mRNA HIGH	1	0.0175439	mRNA LOW	0	0	FUSION	0	0	MISSENSE, INFRAME, TRUNCATING MUTATIONS (PUTATIVE DRIVER)	0	0
ZFHX3	All	5	0.0877193	AMPLIFICATION	0	0	DEEP DELETION	2	0.0350877	mRNA HIGH	0	0	mRNA LOW	2	0.0350877	FUSION	0	0	MISSENSE, INFRAME, TRUNCATING MUTATIONS (PUTATIVE DRIVER)	1	0.0175439
ZPBP2	All	5	0.0877193	AMPLIFICATION	4	0.0701754	DEEP DELETION	0	0	mRNA HIGH	1	0.0175439	mRNA LOW	0	0	FUSION	0	0	MISSENSE, INFRAME, TRUNCATING MUTATIONS (PUTATIVE DRIVER)	0	0

## Sheet: ST_6
Supplementary Table 6. Frequency of alterations belonging to 529 individuals with TCGA-UCEC
GENE	TYPE	TOTAL	f	TYPE	TOTAL	f	TYPE	TOTAL	f	TYPE	TOTAL	f	TYPE	TOTAL	f	TYPE	TOTAL	f	TYPE	TOTAL	f
AANAT	ALL	30	0.0567108	AMPLIFICATION	12	0.0226843	DEEP DELETION	0	0	mRNA HIGH	18	0.0340265	mRNA LOW	0	0	FUSION	0	0	MISSENSE, INFRAME, TRUNCATING MUTATIONS (PUTATIVE DRIVER)	0	0
ADA	ALL	41	0.0775047	AMPLIFICATION	9	0.0170132	DEEP DELETION	1	0.00189036	mRNA HIGH	15	0.0283554	mRNA LOW	16	0.0302457	FUSION	0	0	MISSENSE, INFRAME, TRUNCATING MUTATIONS (PUTATIVE DRIVER)	0	0
ADCY1	ALL	25	0.047259	AMPLIFICATION	5	0.0094518	DEEP DELETION	0	0	mRNA HIGH	17	0.0321361	mRNA LOW	2	0.00378072	FUSION	1	0.00189036	MISSENSE, INFRAME, TRUNCATING MUTATIONS (PUTATIVE DRIVER)	0	0
ADORA1	ALL	32	0.0604915	AMPLIFICATION	11	0.020794	DEEP DELETION	0	0	mRNA HIGH	16	0.0302457	mRNA LOW	5	0.0094518	FUSION	0	0	MISSENSE, INFRAME, TRUNCATING MUTATIONS (PUTATIVE DRIVER)	0	0
ADORA2A	ALL	26	0.0491493	AMPLIFICATION	4	0.00756144	DEEP DELETION	1	0.00189036	mRNA HIGH	17	0.0321361	mRNA LOW	4	0.00756144	FUSION	0	0	MISSENSE, INFRAME, TRUNCATING MUTATIONS (PUTATIVE DRIVER)	0	0
ADRB1	ALL	34	0.0642722	AMPLIFICATION	1	0.00189036	DEEP DELETION	1	0.00189036	mRNA HIGH	21	0.0396975	mRNA LOW	11	0.020794	FUSION	0	0	MISSENSE, INFRAME, TRUNCATING MUTATIONS (PUTATIVE DRIVER)	0	0
AHCY	ALL	46	0.0869565	AMPLIFICATION	18	0.0340265	DEEP DELETION	0	0	mRNA HIGH	19	0.0359168	mRNA LOW	9	0.0170132	FUSION	0	0	MISSENSE, INFRAME, TRUNCATING MUTATIONS (PUTATIVE DRIVER)	0	0
AHR	ALL	38	0.0718336	AMPLIFICATION	9	0.0170132	DEEP DELETION	2	0.00378072	mRNA HIGH	5	0.0094518	mRNA LOW	22	0.0415879	FUSION	0	0	MISSENSE, INFRAME, TRUNCATING MUTATIONS (PUTATIVE DRIVER)	0	0
ALB	ALL	14	0.026465	AMPLIFICATION	0	0	DEEP DELETION	1	0.00189036	mRNA HIGH	13	0.0245747	mRNA LOW	0	0	FUSION	0	0	MISSENSE, INFRAME, TRUNCATING MUTATIONS (PUTATIVE DRIVER)	0	0
ANKFN1	ALL	12	0.0226843	AMPLIFICATION	3	0.00567108	DEEP DELETION	0	0	mRNA HIGH	9	0.0170132	mRNA LOW	0	0	FUSION	0	0	MISSENSE, INFRAME, TRUNCATING MUTATIONS (PUTATIVE DRIVER)	0	0
ARNTL	ALL	32	0.0604915	AMPLIFICATION	5	0.0094518	DEEP DELETION	0	0	mRNA HIGH	8	0.0151229	mRNA LOW	19	0.0359168	FUSION	0	0	MISSENSE, INFRAME, TRUNCATING MUTATIONS (PUTATIVE DRIVER)	0	0
ARNTL2	ALL	32	0.0604915	AMPLIFICATION	6	0.0113422	DEEP DELETION	1	0.00189036	mRNA HIGH	2	0.00378072	mRNA LOW	23	0.0434783	FUSION	0	0	MISSENSE, INFRAME, TRUNCATING MUTATIONS (PUTATIVE DRIVER)	0	0
ASS1	ALL	24	0.0453686	AMPLIFICATION	1	0.00189036	DEEP DELETION	0	0	mRNA HIGH	4	0.00756144	mRNA LOW	19	0.0359168	FUSION	0	0	MISSENSE, INFRAME, TRUNCATING MUTATIONS (PUTATIVE DRIVER)	0	0
ATF4	ALL	34	0.0642722	AMPLIFICATION	6	0.0113422	DEEP DELETION	1	0.00189036	mRNA HIGH	13	0.0245747	mRNA LOW	14	0.026465	FUSION	0	0	MISSENSE, INFRAME, TRUNCATING MUTATIONS (PUTATIVE DRIVER)	0	0
ATG7	ALL	32	0.0604915	AMPLIFICATION	3	0.00567108	DEEP DELETION	1	0.00189036	mRNA HIGH	16	0.0302457	mRNA LOW	11	0.020794	FUSION	1	0.00189036	MISSENSE, INFRAME, TRUNCATING MUTATIONS (PUTATIVE DRIVER)	0	0
ATOH7	ALL	52	0.0982987	AMPLIFICATION	2	0.00378072	DEEP DELETION	0	0	mRNA HIGH	14	0.026465	mRNA LOW	36	0.0680529	FUSION	0	0	MISSENSE, INFRAME, TRUNCATING MUTATIONS (PUTATIVE DRIVER)	0	0
BHLHE40	ALL	35	0.0661626	AMPLIFICATION	3	0.00567108	DEEP DELETION	0	0	mRNA HIGH	12	0.0226843	mRNA LOW	19	0.0359168	FUSION	1	0.00189036	MISSENSE, INFRAME, TRUNCATING MUTATIONS (PUTATIVE DRIVER)	0	0
BHLHE41	ALL	31	0.0586011	AMPLIFICATION	6	0.0113422	DEEP DELETION	0	0	mRNA HIGH	8	0.0151229	mRNA LOW	17	0.0321361	FUSION	0	0	MISSENSE, INFRAME, TRUNCATING MUTATIONS (PUTATIVE DRIVER)	0	0
BTBD9	ALL	29	0.0548204	AMPLIFICATION	2	0.00378072	DEEP DELETION	0	0	mRNA HIGH	10	0.0189036	mRNA LOW	17	0.0321361	FUSION	0	0	MISSENSE, INFRAME, TRUNCATING MUTATIONS (PUTATIVE DRIVER)	0	0
BTRC	ALL	35	0.0661626	AMPLIFICATION	2	0.00378072	DEEP DELETION	3	0.00567108	mRNA HIGH	4	0.00756144	mRNA LOW	26	0.0491493	FUSION	0	0	MISSENSE, INFRAME, TRUNCATING MUTATIONS (PUTATIVE DRIVER)	0	0
CARTPT	ALL	9	0.0170132	AMPLIFICATION	2	0.00378072	DEEP DELETION	3	0.00567108	mRNA HIGH	4	0.00756144	mRNA LOW	0	0	FUSION	0	0	MISSENSE, INFRAME, TRUNCATING MUTATIONS (PUTATIVE DRIVER)	0	0
CASP1	ALL	37	0.0699433	AMPLIFICATION	0	0	DEEP DELETION	4	0.00756144	mRNA HIGH	15	0.0283554	mRNA LOW	18	0.0340265	FUSION	0	0	MISSENSE, INFRAME, TRUNCATING MUTATIONS (PUTATIVE DRIVER)	0	0
CAVIN3	ALL	27	0.0510397	AMPLIFICATION	1	0.00189036	DEEP DELETION	2	0.00378072	mRNA HIGH	17	0.0321361	mRNA LOW	7	0.0132325	FUSION	0	0	MISSENSE, INFRAME, TRUNCATING MUTATIONS (PUTATIVE DRIVER)	0	0
CCAR2	ALL	46	0.0869565	AMPLIFICATION	3	0.00567108	DEEP DELETION	16	0.0302457	mRNA HIGH	12	0.0226843	mRNA LOW	15	0.0283554	FUSION	0	0	MISSENSE, INFRAME, TRUNCATING MUTATIONS (PUTATIVE DRIVER)	0	0
CDK1	ALL	36	0.0680529	AMPLIFICATION	6	0.0113422	DEEP DELETION	0	0	mRNA HIGH	2	0.00378072	mRNA LOW	28	0.0529301	FUSION	0	0	MISSENSE, INFRAME, TRUNCATING MUTATIONS (PUTATIVE DRIVER)	0	0
CHRNB2	ALL	50	0.094518	AMPLIFICATION	21	0.0396975	DEEP DELETION	0	0	mRNA HIGH	17	0.0321361	mRNA LOW	12	0.0226843	FUSION	0	0	MISSENSE, INFRAME, TRUNCATING MUTATIONS (PUTATIVE DRIVER)	0	0
CIART	ALL	55	0.10397	AMPLIFICATION	30	0.0567108	DEEP DELETION	0	0	mRNA HIGH	4	0.00756144	mRNA LOW	21	0.0396975	FUSION	0	0	MISSENSE, INFRAME, TRUNCATING MUTATIONS (PUTATIVE DRIVER)	0	0
CIPC	ALL	41	0.0775047	AMPLIFICATION	12	0.0226843	DEEP DELETION	1	0.00189036	mRNA HIGH	9	0.0170132	mRNA LOW	18	0.0340265	FUSION	1	0.00189036	MISSENSE, INFRAME, TRUNCATING MUTATIONS (PUTATIVE DRIVER)	0	0
CLOCK	ALL	27	0.0510397	AMPLIFICATION	0	0	DEEP DELETION	0	0	mRNA HIGH	2	0.00378072	mRNA LOW	25	0.047259	FUSION	0	0	MISSENSE, INFRAME, TRUNCATING MUTATIONS (PUTATIVE DRIVER)	0	0
CORT	ALL	34	0.0642722	AMPLIFICATION	4	0.00756144	DEEP DELETION	2	0.00378072	mRNA HIGH	14	0.026465	mRNA LOW	14	0.026465	FUSION	0	0	MISSENSE, INFRAME, TRUNCATING MUTATIONS (PUTATIVE DRIVER)	0	0
CREB1	ALL	30	0.0567108	AMPLIFICATION	2	0.00378072	DEEP DELETION	2	0.00378072	mRNA HIGH	3	0.00567108	mRNA LOW	23	0.0434783	FUSION	0	0	MISSENSE, INFRAME, TRUNCATING MUTATIONS (PUTATIVE DRIVER)	0	0
CREM	ALL	33	0.0623819	AMPLIFICATION	5	0.0094518	DEEP DELETION	0	0	mRNA HIGH	18	0.0340265	mRNA LOW	10	0.0189036	FUSION	0	0	MISSENSE, INFRAME, TRUNCATING MUTATIONS (PUTATIVE DRIVER)	0	0
CRTC1	ALL	46	0.0869565	AMPLIFICATION	11	0.020794	DEEP DELETION	0	0	mRNA HIGH	24	0.0453686	mRNA LOW	11	0.020794	FUSION	0	0	MISSENSE, INFRAME, TRUNCATING MUTATIONS (PUTATIVE DRIVER)	0	0
CRY1	ALL	27	0.0510397	AMPLIFICATION	1	0.00189036	DEEP DELETION	0	0	mRNA HIGH	9	0.0170132	mRNA LOW	16	0.0302457	FUSION	1	0.00189036	MISSENSE, INFRAME, TRUNCATING MUTATIONS (PUTATIVE DRIVER)	0	0
CRY2	ALL	35	0.0661626	AMPLIFICATION	4	0.00756144	DEEP DELETION	0	0	mRNA HIGH	21	0.0396975	mRNA LOW	10	0.0189036	FUSION	0	0	MISSENSE, INFRAME, TRUNCATING MUTATIONS (PUTATIVE DRIVER)	0	0
CSF2	ALL	13	0.0245747	AMPLIFICATION	0	0	DEEP DELETION	0	0	mRNA HIGH	13	0.0245747	mRNA LOW	0	0	FUSION	0	0	MISSENSE, INFRAME, TRUNCATING MUTATIONS (PUTATIVE DRIVER)	0	0
CSNK1D	ALL	49	0.0926276	AMPLIFICATION	13	0.0245747	DEEP DELETION	1	0.00189036	mRNA HIGH	23	0.0434783	mRNA LOW	10	0.0189036	FUSION	2	0.00378072	MISSENSE, INFRAME, TRUNCATING MUTATIONS (PUTATIVE DRIVER)	0	0
CSNK1E	ALL	37	0.0699433	AMPLIFICATION	9	0.0170132	DEEP DELETION	0	0	mRNA HIGH	12	0.0226843	mRNA LOW	15	0.0283554	FUSION	1	0.00189036	MISSENSE, INFRAME, TRUNCATING MUTATIONS (PUTATIVE DRIVER)	0	0
CYP7B1	ALL	43	0.0812854	AMPLIFICATION	11	0.020794	DEEP DELETION	0	0	mRNA HIGH	14	0.026465	mRNA LOW	18	0.0340265	FUSION	0	0	MISSENSE, INFRAME, TRUNCATING MUTATIONS (PUTATIVE DRIVER)	0	0
DBP	ALL	37	0.0699433	AMPLIFICATION	5	0.0094518	DEEP DELETION	2	0.00378072	mRNA HIGH	19	0.0359168	mRNA LOW	11	0.020794	FUSION	0	0	MISSENSE, INFRAME, TRUNCATING MUTATIONS (PUTATIVE DRIVER)	0	0
DDB1	ALL	27	0.0510397	AMPLIFICATION	3	0.00567108	DEEP DELETION	0	0	mRNA HIGH	12	0.0226843	mRNA LOW	12	0.0226843	FUSION	0	0	MISSENSE, INFRAME, TRUNCATING MUTATIONS (PUTATIVE DRIVER)	0	0
DDX5	ALL	27	0.0510397	AMPLIFICATION	4	0.00756144	DEEP DELETION	1	0.00189036	mRNA HIGH	5	0.0094518	mRNA LOW	17	0.0321361	FUSION	0	0	MISSENSE, INFRAME, TRUNCATING MUTATIONS (PUTATIVE DRIVER)	0	0
DHX9	ALL	29	0.0548204	AMPLIFICATION	13	0.0245747	DEEP DELETION	0	0	mRNA HIGH	3	0.00567108	mRNA LOW	13	0.0245747	FUSION	0	0	MISSENSE, INFRAME, TRUNCATING MUTATIONS (PUTATIVE DRIVER)	0	0
DPYD	ALL	32	0.0604915	AMPLIFICATION	3	0.00567108	DEEP DELETION	1	0.00189036	mRNA HIGH	10	0.0189036	mRNA LOW	17	0.0321361	FUSION	1	0.00189036	MISSENSE, INFRAME, TRUNCATING MUTATIONS (PUTATIVE DRIVER)	0	0
DRD1	ALL	19	0.0359168	AMPLIFICATION	2	0.00378072	DEEP DELETION	0	0	mRNA HIGH	17	0.0321361	mRNA LOW	0	0	FUSION	0	0	MISSENSE, INFRAME, TRUNCATING MUTATIONS (PUTATIVE DRIVER)	0	0
DRD2	ALL	19	0.0359168	AMPLIFICATION	0	0	DEEP DELETION	3	0.00567108	mRNA HIGH	16	0.0302457	mRNA LOW	0	0	FUSION	0	0	MISSENSE, INFRAME, TRUNCATING MUTATIONS (PUTATIVE DRIVER)	0	0
DRD3	ALL	168	0.31758	AMPLIFICATION	4	0.00756144	DEEP DELETION	1	0.00189036	mRNA HIGH	0	0	mRNA LOW	163	0.308129	FUSION	0	0	MISSENSE, INFRAME, TRUNCATING MUTATIONS (PUTATIVE DRIVER)	0	0
DRD4	ALL	38	0.0718336	AMPLIFICATION	2	0.00378072	DEEP DELETION	4	0.00756144	mRNA HIGH	20	0.0378072	mRNA LOW	12	0.0226843	FUSION	0	0	MISSENSE, INFRAME, TRUNCATING MUTATIONS (PUTATIVE DRIVER)	0	0
DYRK1A	ALL	38	0.0718336	AMPLIFICATION	2	0.00378072	DEEP DELETION	2	0.00378072	mRNA HIGH	14	0.026465	mRNA LOW	20	0.0378072	FUSION	0	0	MISSENSE, INFRAME, TRUNCATING MUTATIONS (PUTATIVE DRIVER)	0	0
EGR1	ALL	34	0.0642722	AMPLIFICATION	1	0.00189036	DEEP DELETION	0	0	mRNA HIGH	18	0.0340265	mRNA LOW	13	0.0245747	FUSION	0	0	MISSENSE, INFRAME, TRUNCATING MUTATIONS (PUTATIVE DRIVER)	2	0.00378072
EP300	ALL	76	0.143667	AMPLIFICATION	3	0.00567108	DEEP DELETION	2	0.00378072	mRNA HIGH	4	0.00756144	mRNA LOW	24	0.0453686	FUSION	1	0.00189036	MISSENSE, INFRAME, TRUNCATING MUTATIONS (PUTATIVE DRIVER)	42	0.0793951
EZH2	ALL	40	0.0756144	AMPLIFICATION	1	0.00189036	DEEP DELETION	0	0	mRNA HIGH	13	0.0245747	mRNA LOW	12	0.0226843	FUSION	0	0	MISSENSE, INFRAME, TRUNCATING MUTATIONS (PUTATIVE DRIVER)	14	0.026465
FBXL3	ALL	30	0.0567108	AMPLIFICATION	0	0	DEEP DELETION	2	0.00378072	mRNA HIGH	6	0.0113422	mRNA LOW	22	0.0415879	FUSION	0	0	MISSENSE, INFRAME, TRUNCATING MUTATIONS (PUTATIVE DRIVER)	0	0
FBXL6	ALL	47	0.0888469	AMPLIFICATION	18	0.0340265	DEEP DELETION	1	0.00189036	mRNA HIGH	17	0.0321361	mRNA LOW	11	0.020794	FUSION	0	0	MISSENSE, INFRAME, TRUNCATING MUTATIONS (PUTATIVE DRIVER)	0	0
FBXL8	ALL	32	0.0604915	AMPLIFICATION	2	0.00378072	DEEP DELETION	3	0.00567108	mRNA HIGH	15	0.0283554	mRNA LOW	12	0.0226843	FUSION	0	0	MISSENSE, INFRAME, TRUNCATING MUTATIONS (PUTATIVE DRIVER)	0	0
FBXL12	ALL	45	0.0850662	AMPLIFICATION	14	0.026465	DEEP DELETION	1	0.00189036	mRNA HIGH	21	0.0396975	mRNA LOW	9	0.0170132	FUSION	0	0	MISSENSE, INFRAME, TRUNCATING MUTATIONS (PUTATIVE DRIVER)	0	0
FBXL17	ALL	27	0.0510397	AMPLIFICATION	0	0	DEEP DELETION	2	0.00378072	mRNA HIGH	5	0.0094518	mRNA LOW	20	0.0378072	FUSION	0	0	MISSENSE, INFRAME, TRUNCATING MUTATIONS (PUTATIVE DRIVER)	0	0
FBXL21P	ALL	4	0.00756144	AMPLIFICATION	0	0	DEEP DELETION	0	0	mRNA HIGH	4	0.00756144	mRNA LOW	0	0	FUSION	0	0	MISSENSE, INFRAME, TRUNCATING MUTATIONS (PUTATIVE DRIVER)	0	0
FBXL22	ALL	34	0.0642722	AMPLIFICATION	2	0.00378072	DEEP DELETION	1	0.00189036	mRNA HIGH	20	0.0378072	mRNA LOW	11	0.020794	FUSION	0	0	MISSENSE, INFRAME, TRUNCATING MUTATIONS (PUTATIVE DRIVER)	0	0
FBXW7	ALL	109	0.206049	AMPLIFICATION	2	0.00378072	DEEP DELETION	1	0.00189036	mRNA HIGH	13	0.0245747	mRNA LOW	10	0.0189036	FUSION	0	0	MISSENSE, INFRAME, TRUNCATING MUTATIONS (PUTATIVE DRIVER)	83	0.1569
FBXW11	ALL	27	0.0510397	AMPLIFICATION	2	0.00378072	DEEP DELETION	0	0	mRNA HIGH	8	0.0151229	mRNA LOW	17	0.0321361	FUSION	0	0	MISSENSE, INFRAME, TRUNCATING MUTATIONS (PUTATIVE DRIVER)	0	0
GABRB3	ALL	24	0.0453686	AMPLIFICATION	0	0	DEEP DELETION	1	0.00189036	mRNA HIGH	23	0.0434783	mRNA LOW	0	0	FUSION	0	0	MISSENSE, INFRAME, TRUNCATING MUTATIONS (PUTATIVE DRIVER)	0	0
GFPT1	ALL	32	0.0604915	AMPLIFICATION	2	0.00378072	DEEP DELETION	0	0	mRNA HIGH	17	0.0321361	mRNA LOW	13	0.0245747	FUSION	0	0	MISSENSE, INFRAME, TRUNCATING MUTATIONS (PUTATIVE DRIVER)	0	0
GHRH	ALL	14	0.026465	AMPLIFICATION	12	0.0226843	DEEP DELETION	0	0	mRNA HIGH	2	0.00378072	mRNA LOW	0	0	FUSION	0	0	MISSENSE, INFRAME, TRUNCATING MUTATIONS (PUTATIVE DRIVER)	0	0
GHRHR	ALL	8	0.0151229	AMPLIFICATION	7	0.0132325	DEEP DELETION	0	0	mRNA HIGH	1	0.00189036	mRNA LOW	0	0	FUSION	0	0	MISSENSE, INFRAME, TRUNCATING MUTATIONS (PUTATIVE DRIVER)	0	0
GHRL	ALL	30	0.0567108	AMPLIFICATION	0	0	DEEP DELETION	0	0	mRNA HIGH	15	0.0283554	mRNA LOW	14	0.026465	FUSION	1	0.00189036	MISSENSE, INFRAME, TRUNCATING MUTATIONS (PUTATIVE DRIVER)	0	0
GPR157	ALL	34	0.0642722	AMPLIFICATION	3	0.00567108	DEEP DELETION	2	0.00378072	mRNA HIGH	9	0.0170132	mRNA LOW	20	0.0378072	FUSION	0	0	MISSENSE, INFRAME, TRUNCATING MUTATIONS (PUTATIVE DRIVER)	0	0
GPR176	ALL	39	0.073724	AMPLIFICATION	1	0.00189036	DEEP DELETION	4	0.00756144	mRNA HIGH	15	0.0283554	mRNA LOW	19	0.0359168	FUSION	0	0	MISSENSE, INFRAME, TRUNCATING MUTATIONS (PUTATIVE DRIVER)	0	0
GSK3B	ALL	36	0.0680529	AMPLIFICATION	4	0.00756144	DEEP DELETION	1	0.00189036	mRNA HIGH	11	0.020794	mRNA LOW	19	0.0359168	FUSION	1	0.00189036	MISSENSE, INFRAME, TRUNCATING MUTATIONS (PUTATIVE DRIVER)	0	0
HCRTR2	ALL	7	0.0132325	AMPLIFICATION	1	0.00189036	DEEP DELETION	1	0.00189036	mRNA HIGH	5	0.0094518	mRNA LOW	0	0	FUSION	0	0	MISSENSE, INFRAME, TRUNCATING MUTATIONS (PUTATIVE DRIVER)	0	0
HDAC1	ALL	33	0.0623819	AMPLIFICATION	7	0.0132325	DEEP DELETION	0	0	mRNA HIGH	12	0.0226843	mRNA LOW	12	0.0226843	FUSION	0	0	MISSENSE, INFRAME, TRUNCATING MUTATIONS (PUTATIVE DRIVER)	2	0.00378072
HDAC2	ALL	30	0.0567108	AMPLIFICATION	0	0	DEEP DELETION	1	0.00189036	mRNA HIGH	12	0.0226843	mRNA LOW	17	0.0321361	FUSION	0	0	MISSENSE, INFRAME, TRUNCATING MUTATIONS (PUTATIVE DRIVER)	0	0
HDAC3	ALL	29	0.0548204	AMPLIFICATION	0	0	DEEP DELETION	0	0	mRNA HIGH	16	0.0302457	mRNA LOW	13	0.0245747	FUSION	0	0	MISSENSE, INFRAME, TRUNCATING MUTATIONS (PUTATIVE DRIVER)	0	0
HNF1B	ALL	51	0.0964083	AMPLIFICATION	10	0.0189036	DEEP DELETION	3	0.00567108	mRNA HIGH	0	0	mRNA LOW	38	0.0718336	FUSION	0	0	MISSENSE, INFRAME, TRUNCATING MUTATIONS (PUTATIVE DRIVER)	0	0
HNF4A	ALL	23	0.0434783	AMPLIFICATION	8	0.0151229	DEEP DELETION	1	0.00189036	mRNA HIGH	14	0.026465	mRNA LOW	0	0	FUSION	0	0	MISSENSE, INFRAME, TRUNCATING MUTATIONS (PUTATIVE DRIVER)	0	0
HNRNPD	ALL	28	0.0529301	AMPLIFICATION	1	0.00189036	DEEP DELETION	0	0	mRNA HIGH	14	0.026465	mRNA LOW	13	0.0245747	FUSION	0	0	MISSENSE, INFRAME, TRUNCATING MUTATIONS (PUTATIVE DRIVER)	0	0
HNRNPU	ALL	40	0.0756144	AMPLIFICATION	15	0.0283554	DEEP DELETION	0	0	mRNA HIGH	4	0.00756144	mRNA LOW	21	0.0396975	FUSION	0	0	MISSENSE, INFRAME, TRUNCATING MUTATIONS (PUTATIVE DRIVER)	0	0
HS3ST2	ALL	43	0.0812854	AMPLIFICATION	2	0.00378072	DEEP DELETION	1	0.00189036	mRNA HIGH	16	0.0302457	mRNA LOW	24	0.0453686	FUSION	0	0	MISSENSE, INFRAME, TRUNCATING MUTATIONS (PUTATIVE DRIVER)	0	0
HTR7	ALL	63	0.119093	AMPLIFICATION	4	0.00756144	DEEP DELETION	2	0.00378072	mRNA HIGH	13	0.0245747	mRNA LOW	43	0.0812854	FUSION	1	0.00189036	MISSENSE, INFRAME, TRUNCATING MUTATIONS (PUTATIVE DRIVER)	0	0
HUWE1	ALL	23	0.0434783	AMPLIFICATION	4	0.00756144	DEEP DELETION	2	0.00378072	mRNA HIGH	8	0.0151229	mRNA LOW	9	0.0170132	FUSION	0	0	MISSENSE, INFRAME, TRUNCATING MUTATIONS (PUTATIVE DRIVER)	0	0
ID1	ALL	51	0.0964083	AMPLIFICATION	23	0.0434783	DEEP DELETION	0	0	mRNA HIGH	3	0.00567108	mRNA LOW	25	0.047259	FUSION	0	0	MISSENSE, INFRAME, TRUNCATING MUTATIONS (PUTATIVE DRIVER)	0	0
ID2	ALL	31	0.0586011	AMPLIFICATION	7	0.0132325	DEEP DELETION	0	0	mRNA HIGH	6	0.0113422	mRNA LOW	18	0.0340265	FUSION	0	0	MISSENSE, INFRAME, TRUNCATING MUTATIONS (PUTATIVE DRIVER)	0	0
ID3	ALL	21	0.0396975	AMPLIFICATION	1	0.00189036	DEEP DELETION	2	0.00378072	mRNA HIGH	4	0.00756144	mRNA LOW	14	0.026465	FUSION	0	0	MISSENSE, INFRAME, TRUNCATING MUTATIONS (PUTATIVE DRIVER)	0	0
ID4	ALL	30	0.0567108	AMPLIFICATION	6	0.0113422	DEEP DELETION	0	0	mRNA HIGH	2	0.00378072	mRNA LOW	22	0.0415879	FUSION	0	0	MISSENSE, INFRAME, TRUNCATING MUTATIONS (PUTATIVE DRIVER)	0	0
IL6	ALL	44	0.0831758	AMPLIFICATION	8	0.0151229	DEEP DELETION	2	0.00378072	mRNA HIGH	24	0.0453686	mRNA LOW	10	0.0189036	FUSION	0	0	MISSENSE, INFRAME, TRUNCATING MUTATIONS (PUTATIVE DRIVER)	0	0
IMPDH2	ALL	22	0.0415879	AMPLIFICATION	0	0	DEEP DELETION	0	0	mRNA HIGH	16	0.0302457	mRNA LOW	6	0.0113422	FUSION	0	0	MISSENSE, INFRAME, TRUNCATING MUTATIONS (PUTATIVE DRIVER)	0	0
KCNA2	ALL	19	0.0359168	AMPLIFICATION	2	0.00378072	DEEP DELETION	1	0.00189036	mRNA HIGH	16	0.0302457	mRNA LOW	0	0	FUSION	0	0	MISSENSE, INFRAME, TRUNCATING MUTATIONS (PUTATIVE DRIVER)	0	0
KCND2	ALL	29	0.0548204	AMPLIFICATION	1	0.00189036	DEEP DELETION	1	0.00189036	mRNA HIGH	10	0.0189036	mRNA LOW	17	0.0321361	FUSION	0	0	MISSENSE, INFRAME, TRUNCATING MUTATIONS (PUTATIVE DRIVER)	0	0
KCNMA1	ALL	32	0.0604915	AMPLIFICATION	14	0.026465	DEEP DELETION	0	0	mRNA HIGH	7	0.0132325	mRNA LOW	11	0.020794	FUSION	0	0	MISSENSE, INFRAME, TRUNCATING MUTATIONS (PUTATIVE DRIVER)	0	0
KDM2A	ALL	37	0.0699433	AMPLIFICATION	11	0.020794	DEEP DELETION	0	0	mRNA HIGH	17	0.0321361	mRNA LOW	9	0.0170132	FUSION	0	0	MISSENSE, INFRAME, TRUNCATING MUTATIONS (PUTATIVE DRIVER)	0	0
KDM5A	ALL	30	0.0567108	AMPLIFICATION	7	0.0132325	DEEP DELETION	2	0.00378072	mRNA HIGH	15	0.0283554	mRNA LOW	6	0.0113422	FUSION	0	0	MISSENSE, INFRAME, TRUNCATING MUTATIONS (PUTATIVE DRIVER)	0	0
KDM5B	ALL	38	0.0718336	AMPLIFICATION	11	0.020794	DEEP DELETION	0	0	mRNA HIGH	10	0.0189036	mRNA LOW	17	0.0321361	FUSION	0	0	MISSENSE, INFRAME, TRUNCATING MUTATIONS (PUTATIVE DRIVER)	0	0
KDM5C	ALL	44	0.0831758	AMPLIFICATION	3	0.00567108	DEEP DELETION	2	0.00378072	mRNA HIGH	11	0.020794	mRNA LOW	17	0.0321361	FUSION	0	0	MISSENSE, INFRAME, TRUNCATING MUTATIONS (PUTATIVE DRIVER)	11	0.020794
KDM8	ALL	30	0.0567108	AMPLIFICATION	5	0.0094518	DEEP DELETION	0	0	mRNA HIGH	13	0.0245747	mRNA LOW	12	0.0226843	FUSION	0	0	MISSENSE, INFRAME, TRUNCATING MUTATIONS (PUTATIVE DRIVER)	0	0
KLF10	ALL	45	0.0850662	AMPLIFICATION	16	0.0302457	DEEP DELETION	0	0	mRNA HIGH	6	0.0113422	mRNA LOW	23	0.0434783	FUSION	0	0	MISSENSE, INFRAME, TRUNCATING MUTATIONS (PUTATIVE DRIVER)	0	0
KMT2A	ALL	65	0.122873	AMPLIFICATION	6	0.0113422	DEEP DELETION	2	0.00378072	mRNA HIGH	14	0.026465	mRNA LOW	18	0.0340265	FUSION	0	0	MISSENSE, INFRAME, TRUNCATING MUTATIONS (PUTATIVE DRIVER)	25	0.047259
LEPR	ALL	31	0.0586011	AMPLIFICATION	1	0.00189036	DEEP DELETION	0	0	mRNA HIGH	20	0.0378072	mRNA LOW	10	0.0189036	FUSION	0	0	MISSENSE, INFRAME, TRUNCATING MUTATIONS (PUTATIVE DRIVER)	0	0
LGR4	ALL	28	0.0529301	AMPLIFICATION	2	0.00378072	DEEP DELETION	1	0.00189036	mRNA HIGH	7	0.0132325	mRNA LOW	18	0.0340265	FUSION	0	0	MISSENSE, INFRAME, TRUNCATING MUTATIONS (PUTATIVE DRIVER)	0	0
MAGED1	ALL	30	0.0567108	AMPLIFICATION	7	0.0132325	DEEP DELETION	1	0.00189036	mRNA HIGH	8	0.0151229	mRNA LOW	14	0.026465	FUSION	0	0	MISSENSE, INFRAME, TRUNCATING MUTATIONS (PUTATIVE DRIVER)	0	0
MAGEL2	ALL	26	0.0491493	AMPLIFICATION	0	0	DEEP DELETION	3	0.00567108	mRNA HIGH	23	0.0434783	mRNA LOW	0	0	FUSION	0	0	MISSENSE, INFRAME, TRUNCATING MUTATIONS (PUTATIVE DRIVER)	0	0
MAPK8	ALL	21	0.0396975	AMPLIFICATION	0	0	DEEP DELETION	1	0.00189036	mRNA HIGH	0	0	mRNA LOW	20	0.0378072	FUSION	0	0	MISSENSE, INFRAME, TRUNCATING MUTATIONS (PUTATIVE DRIVER)	0	0
MAPK9	ALL	31	0.0586011	AMPLIFICATION	2	0.00378072	DEEP DELETION	1	0.00189036	mRNA HIGH	11	0.020794	mRNA LOW	17	0.0321361	FUSION	0	0	MISSENSE, INFRAME, TRUNCATING MUTATIONS (PUTATIVE DRIVER)	0	0
MAPK10	ALL	27	0.0510397	AMPLIFICATION	1	0.00189036	DEEP DELETION	1	0.00189036	mRNA HIGH	7	0.0132325	mRNA LOW	18	0.0340265	FUSION	0	0	MISSENSE, INFRAME, TRUNCATING MUTATIONS (PUTATIVE DRIVER)	0	0
MAT2A	ALL	28	0.0529301	AMPLIFICATION	5	0.0094518	DEEP DELETION	0	0	mRNA HIGH	9	0.0170132	mRNA LOW	14	0.026465	FUSION	0	0	MISSENSE, INFRAME, TRUNCATING MUTATIONS (PUTATIVE DRIVER)	0	0
MC3R	ALL	10	0.0189036	AMPLIFICATION	7	0.0132325	DEEP DELETION	1	0.00189036	mRNA HIGH	2	0.00378072	mRNA LOW	0	0	FUSION	0	0	MISSENSE, INFRAME, TRUNCATING MUTATIONS (PUTATIVE DRIVER)	0	0
METTL3	ALL	28	0.0529301	AMPLIFICATION	3	0.00567108	DEEP DELETION	0	0	mRNA HIGH	10	0.0189036	mRNA LOW	15	0.0283554	FUSION	0	0	MISSENSE, INFRAME, TRUNCATING MUTATIONS (PUTATIVE DRIVER)	0	0
MTA1	ALL	27	0.0510397	AMPLIFICATION	4	0.00756144	DEEP DELETION	0	0	mRNA HIGH	12	0.0226843	mRNA LOW	11	0.020794	FUSION	0	0	MISSENSE, INFRAME, TRUNCATING MUTATIONS (PUTATIVE DRIVER)	0	0
MTNR1A	ALL	18	0.0340265	AMPLIFICATION	1	0.00189036	DEEP DELETION	7	0.0132325	mRNA HIGH	10	0.0189036	mRNA LOW	0	0	FUSION	0	0	MISSENSE, INFRAME, TRUNCATING MUTATIONS (PUTATIVE DRIVER)	0	0
MTNR1B	ALL	5	0.0094518	AMPLIFICATION	2	0.00378072	DEEP DELETION	2	0.00378072	mRNA HIGH	1	0.00189036	mRNA LOW	0	0	FUSION	0	0	MISSENSE, INFRAME, TRUNCATING MUTATIONS (PUTATIVE DRIVER)	0	0
MTOR	ALL	60	0.113422	AMPLIFICATION	7	0.0132325	DEEP DELETION	2	0.00378072	mRNA HIGH	15	0.0283554	mRNA LOW	13	0.0245747	FUSION	3	0.00567108	MISSENSE, INFRAME, TRUNCATING MUTATIONS (PUTATIVE DRIVER)	20	0.0378072
SLC25A19	ALL	37	0.0699433	AMPLIFICATION	12	0.0226843	DEEP DELETION	0	0	mRNA HIGH	14	0.026465	mRNA LOW	11	0.020794	FUSION	0	0	MISSENSE, INFRAME, TRUNCATING MUTATIONS (PUTATIVE DRIVER)	0	0
MYBBP1A	ALL	28	0.0529301	AMPLIFICATION	3	0.00567108	DEEP DELETION	0	0	mRNA HIGH	10	0.0189036	mRNA LOW	15	0.0283554	FUSION	0	0	MISSENSE, INFRAME, TRUNCATING MUTATIONS (PUTATIVE DRIVER)	0	0
MYCBP2	ALL	30	0.0567108	AMPLIFICATION	0	0	DEEP DELETION	2	0.00378072	mRNA HIGH	10	0.0189036	mRNA LOW	18	0.0340265	FUSION	0	0	MISSENSE, INFRAME, TRUNCATING MUTATIONS (PUTATIVE DRIVER)	0	0
NAGLU	ALL	29	0.0548204	AMPLIFICATION	1	0.00189036	DEEP DELETION	0	0	mRNA HIGH	18	0.0340265	mRNA LOW	10	0.0189036	FUSION	0	0	MISSENSE, INFRAME, TRUNCATING MUTATIONS (PUTATIVE DRIVER)	0	0
NAMPT	ALL	36	0.0680529	AMPLIFICATION	1	0.00189036	DEEP DELETION	0	0	mRNA HIGH	15	0.0283554	mRNA LOW	20	0.0378072	FUSION	0	0	MISSENSE, INFRAME, TRUNCATING MUTATIONS (PUTATIVE DRIVER)	0	0
NCOA2	ALL	47	0.0888469	AMPLIFICATION	17	0.0321361	DEEP DELETION	0	0	mRNA HIGH	3	0.00567108	mRNA LOW	26	0.0491493	FUSION	1	0.00189036	MISSENSE, INFRAME, TRUNCATING MUTATIONS (PUTATIVE DRIVER)	0	0
NCOR1	ALL	42	0.0793951	AMPLIFICATION	2	0.00378072	DEEP DELETION	2	0.00378072	mRNA HIGH	8	0.0151229	mRNA LOW	14	0.026465	FUSION	0	0	MISSENSE, INFRAME, TRUNCATING MUTATIONS (PUTATIVE DRIVER)	16	0.0302457
NDUFA9	ALL	34	0.0642722	AMPLIFICATION	3	0.00567108	DEEP DELETION	1	0.00189036	mRNA HIGH	25	0.047259	mRNA LOW	5	0.0094518	FUSION	0	0	MISSENSE, INFRAME, TRUNCATING MUTATIONS (PUTATIVE DRIVER)	0	0
NFIL3	ALL	28	0.0529301	AMPLIFICATION	2	0.00378072	DEEP DELETION	0	0	mRNA HIGH	13	0.0245747	mRNA LOW	13	0.0245747	FUSION	0	0	MISSENSE, INFRAME, TRUNCATING MUTATIONS (PUTATIVE DRIVER)	0	0
NGFR	ALL	34	0.0642722	AMPLIFICATION	1	0.00189036	DEEP DELETION	1	0.00189036	mRNA HIGH	17	0.0321361	mRNA LOW	15	0.0283554	FUSION	0	0	MISSENSE, INFRAME, TRUNCATING MUTATIONS (PUTATIVE DRIVER)	0	0
NKX2-1	ALL	10	0.0189036	AMPLIFICATION	2	0.00378072	DEEP DELETION	0	0	mRNA HIGH	8	0.0151229	mRNA LOW	0	0	FUSION	0	0	MISSENSE, INFRAME, TRUNCATING MUTATIONS (PUTATIVE DRIVER)	0	0
NLGN1	ALL	51	0.0964083	AMPLIFICATION	33	0.0623819	DEEP DELETION	2	0.00378072	mRNA HIGH	16	0.0302457	mRNA LOW	0	0	FUSION	0	0	MISSENSE, INFRAME, TRUNCATING MUTATIONS (PUTATIVE DRIVER)	0	0
NMS	ALL	1	0.00189036	AMPLIFICATION	1	0.00189036	DEEP DELETION	0	0	mRNA HIGH	0	0	mRNA LOW	0	0	FUSION	0	0	MISSENSE, INFRAME, TRUNCATING MUTATIONS (PUTATIVE DRIVER)	0	0
NMU	ALL	31	0.0586011	AMPLIFICATION	0	0	DEEP DELETION	0	0	mRNA HIGH	7	0.0132325	mRNA LOW	24	0.0453686	FUSION	0	0	MISSENSE, INFRAME, TRUNCATING MUTATIONS (PUTATIVE DRIVER)	0	0
NOCT	ALL	26	0.0491493	AMPLIFICATION	2	0.00378072	DEEP DELETION	2	0.00378072	mRNA HIGH	15	0.0283554	mRNA LOW	7	0.0132325	FUSION	0	0	MISSENSE, INFRAME, TRUNCATING MUTATIONS (PUTATIVE DRIVER)	0	0
NONO	ALL	30	0.0567108	AMPLIFICATION	3	0.00567108	DEEP DELETION	1	0.00189036	mRNA HIGH	13	0.0245747	mRNA LOW	13	0.0245747	FUSION	0	0	MISSENSE, INFRAME, TRUNCATING MUTATIONS (PUTATIVE DRIVER)	0	0
NPAS2	ALL	30	0.0567108	AMPLIFICATION	1	0.00189036	DEEP DELETION	0	0	mRNA HIGH	5	0.0094518	mRNA LOW	24	0.0453686	FUSION	0	0	MISSENSE, INFRAME, TRUNCATING MUTATIONS (PUTATIVE DRIVER)	0	0
NPS	ALL	3	0.00567108	AMPLIFICATION	2	0.00378072	DEEP DELETION	1	0.00189036	mRNA HIGH	0	0	mRNA LOW	0	0	FUSION	0	0	MISSENSE, INFRAME, TRUNCATING MUTATIONS (PUTATIVE DRIVER)	0	0
NPY2R	ALL	4	0.00756144	AMPLIFICATION	1	0.00189036	DEEP DELETION	2	0.00378072	mRNA HIGH	1	0.00189036	mRNA LOW	0	0	FUSION	0	0	MISSENSE, INFRAME, TRUNCATING MUTATIONS (PUTATIVE DRIVER)	0	0
NR0B2	ALL	36	0.0680529	AMPLIFICATION	0	0	DEEP DELETION	2	0.00378072	mRNA HIGH	34	0.0642722	mRNA LOW	0	0	FUSION	0	0	MISSENSE, INFRAME, TRUNCATING MUTATIONS (PUTATIVE DRIVER)	0	0
NR1D1	ALL	39	0.073724	AMPLIFICATION	15	0.0283554	DEEP DELETION	1	0.00189036	mRNA HIGH	13	0.0245747	mRNA LOW	9	0.0170132	FUSION	1	0.00189036	MISSENSE, INFRAME, TRUNCATING MUTATIONS (PUTATIVE DRIVER)	0	0
NR1D2	ALL	29	0.0548204	AMPLIFICATION	1	0.00189036	DEEP DELETION	2	0.00378072	mRNA HIGH	2	0.00378072	mRNA LOW	24	0.0453686	FUSION	0	0	MISSENSE, INFRAME, TRUNCATING MUTATIONS (PUTATIVE DRIVER)	0	0
NR2F6	ALL	46	0.0869565	AMPLIFICATION	20	0.0378072	DEEP DELETION	0	0	mRNA HIGH	17	0.0321361	mRNA LOW	7	0.0132325	FUSION	2	0.00378072	MISSENSE, INFRAME, TRUNCATING MUTATIONS (PUTATIVE DRIVER)	0	0
NRIP1	ALL	30	0.0567108	AMPLIFICATION	2	0.00378072	DEEP DELETION	1	0.00189036	mRNA HIGH	8	0.0151229	mRNA LOW	19	0.0359168	FUSION	0	0	MISSENSE, INFRAME, TRUNCATING MUTATIONS (PUTATIVE DRIVER)	0	0
OGT	ALL	31	0.0586011	AMPLIFICATION	2	0.00378072	DEEP DELETION	0	0	mRNA HIGH	17	0.0321361	mRNA LOW	12	0.0226843	FUSION	0	0	MISSENSE, INFRAME, TRUNCATING MUTATIONS (PUTATIVE DRIVER)	0	0
OPN4	ALL	19	0.0359168	AMPLIFICATION	5	0.0094518	DEEP DELETION	1	0.00189036	mRNA HIGH	13	0.0245747	mRNA LOW	0	0	FUSION	0	0	MISSENSE, INFRAME, TRUNCATING MUTATIONS (PUTATIVE DRIVER)	0	0
OPN5	ALL	8	0.0151229	AMPLIFICATION	1	0.00189036	DEEP DELETION	0	0	mRNA HIGH	7	0.0132325	mRNA LOW	0	0	FUSION	0	0	MISSENSE, INFRAME, TRUNCATING MUTATIONS (PUTATIVE DRIVER)	0	0
OPRL1	ALL	31	0.0586011	AMPLIFICATION	15	0.0283554	DEEP DELETION	0	0	mRNA HIGH	10	0.0189036	mRNA LOW	6	0.0113422	FUSION	0	0	MISSENSE, INFRAME, TRUNCATING MUTATIONS (PUTATIVE DRIVER)	0	0
PDE6B	ALL	16	0.0302457	AMPLIFICATION	7	0.0132325	DEEP DELETION	1	0.00189036	mRNA HIGH	5	0.0094518	mRNA LOW	3	0.00567108	FUSION	0	0	MISSENSE, INFRAME, TRUNCATING MUTATIONS (PUTATIVE DRIVER)	0	0
PER1	ALL	32	0.0604915	AMPLIFICATION	3	0.00567108	DEEP DELETION	2	0.00378072	mRNA HIGH	20	0.0378072	mRNA LOW	7	0.0132325	FUSION	0	0	MISSENSE, INFRAME, TRUNCATING MUTATIONS (PUTATIVE DRIVER)	0	0
PER2	ALL	35	0.0661626	AMPLIFICATION	2	0.00378072	DEEP DELETION	2	0.00378072	mRNA HIGH	9	0.0170132	mRNA LOW	22	0.0415879	FUSION	0	0	MISSENSE, INFRAME, TRUNCATING MUTATIONS (PUTATIVE DRIVER)	0	0
PER3	ALL	30	0.0567108	AMPLIFICATION	3	0.00567108	DEEP DELETION	2	0.00378072	mRNA HIGH	8	0.0151229	mRNA LOW	17	0.0321361	FUSION	0	0	MISSENSE, INFRAME, TRUNCATING MUTATIONS (PUTATIVE DRIVER)	0	0
PHLPP1	ALL	29	0.0548204	AMPLIFICATION	1	0.00189036	DEEP DELETION	3	0.00567108	mRNA HIGH	8	0.0151229	mRNA LOW	17	0.0321361	FUSION	0	0	MISSENSE, INFRAME, TRUNCATING MUTATIONS (PUTATIVE DRIVER)	0	0
PIWIL2	ALL	31	0.0586011	AMPLIFICATION	2	0.00378072	DEEP DELETION	16	0.0302457	mRNA HIGH	13	0.0245747	mRNA LOW	0	0	FUSION	0	0	MISSENSE, INFRAME, TRUNCATING MUTATIONS (PUTATIVE DRIVER)	0	0
PMCH	ALL	26	0.0491493	AMPLIFICATION	1	0.00189036	DEEP DELETION	0	0	mRNA HIGH	24	0.0453686	mRNA LOW	0	0	FUSION	1	0.00189036	MISSENSE, INFRAME, TRUNCATING MUTATIONS (PUTATIVE DRIVER)	0	0
PML	ALL	30	0.0567108	AMPLIFICATION	4	0.00756144	DEEP DELETION	0	0	mRNA HIGH	12	0.0226843	mRNA LOW	14	0.026465	FUSION	0	0	MISSENSE, INFRAME, TRUNCATING MUTATIONS (PUTATIVE DRIVER)	0	0
PPARA	ALL	39	0.073724	AMPLIFICATION	5	0.0094518	DEEP DELETION	11	0.020794	mRNA HIGH	9	0.0170132	mRNA LOW	14	0.026465	FUSION	0	0	MISSENSE, INFRAME, TRUNCATING MUTATIONS (PUTATIVE DRIVER)	0	0
PPARG	ALL	21	0.0396975	AMPLIFICATION	2	0.00378072	DEEP DELETION	0	0	mRNA HIGH	10	0.0189036	mRNA LOW	9	0.0170132	FUSION	0	0	MISSENSE, INFRAME, TRUNCATING MUTATIONS (PUTATIVE DRIVER)	0	0
PPARGC1A	ALL	16	0.0302457	AMPLIFICATION	0	0	DEEP DELETION	2	0.00378072	mRNA HIGH	14	0.026465	mRNA LOW	0	0	FUSION	0	0	MISSENSE, INFRAME, TRUNCATING MUTATIONS (PUTATIVE DRIVER)	0	0
PPP1CA	ALL	43	0.0812854	AMPLIFICATION	16	0.0302457	DEEP DELETION	0	0	mRNA HIGH	22	0.0415879	mRNA LOW	5	0.0094518	FUSION	0	0	MISSENSE, INFRAME, TRUNCATING MUTATIONS (PUTATIVE DRIVER)	0	0
PPP1CB	ALL	37	0.0699433	AMPLIFICATION	9	0.0170132	DEEP DELETION	0	0	mRNA HIGH	11	0.020794	mRNA LOW	17	0.0321361	FUSION	0	0	MISSENSE, INFRAME, TRUNCATING MUTATIONS (PUTATIVE DRIVER)	0	0
PPP1CC	ALL	32	0.0604915	AMPLIFICATION	1	0.00189036	DEEP DELETION	0	0	mRNA HIGH	6	0.0113422	mRNA LOW	25	0.047259	FUSION	0	0	MISSENSE, INFRAME, TRUNCATING MUTATIONS (PUTATIVE DRIVER)	0	0
PRF1	ALL	29	0.0548204	AMPLIFICATION	5	0.0094518	DEEP DELETION	0	0	mRNA HIGH	17	0.0321361	mRNA LOW	7	0.0132325	FUSION	0	0	MISSENSE, INFRAME, TRUNCATING MUTATIONS (PUTATIVE DRIVER)	0	0
PRKAA1	ALL	37	0.0699433	AMPLIFICATION	13	0.0245747	DEEP DELETION	0	0	mRNA HIGH	5	0.0094518	mRNA LOW	19	0.0359168	FUSION	0	0	MISSENSE, INFRAME, TRUNCATING MUTATIONS (PUTATIVE DRIVER)	0	0
PRKAA2	ALL	25	0.047259	AMPLIFICATION	2	0.00378072	DEEP DELETION	0	0	mRNA HIGH	1	0.00189036	mRNA LOW	22	0.0415879	FUSION	0	0	MISSENSE, INFRAME, TRUNCATING MUTATIONS (PUTATIVE DRIVER)	0	0
PRKCG	ALL	25	0.047259	AMPLIFICATION	3	0.00567108	DEEP DELETION	1	0.00189036	mRNA HIGH	21	0.0396975	mRNA LOW	0	0	FUSION	0	0	MISSENSE, INFRAME, TRUNCATING MUTATIONS (PUTATIVE DRIVER)	0	0
PRKDC	ALL	33	0.0623819	AMPLIFICATION	12	0.0226843	DEEP DELETION	0	0	mRNA HIGH	10	0.0189036	mRNA LOW	11	0.020794	FUSION	0	0	MISSENSE, INFRAME, TRUNCATING MUTATIONS (PUTATIVE DRIVER)	0	0
PRKG1	ALL	36	0.0680529	AMPLIFICATION	4	0.00756144	DEEP DELETION	3	0.00567108	mRNA HIGH	14	0.026465	mRNA LOW	15	0.0283554	FUSION	0	0	MISSENSE, INFRAME, TRUNCATING MUTATIONS (PUTATIVE DRIVER)	0	0
PRKG2	ALL	8	0.0151229	AMPLIFICATION	1	0.00189036	DEEP DELETION	0	0	mRNA HIGH	7	0.0132325	mRNA LOW	0	0	FUSION	0	0	MISSENSE, INFRAME, TRUNCATING MUTATIONS (PUTATIVE DRIVER)	0	0
PRMT5	ALL	35	0.0661626	AMPLIFICATION	3	0.00567108	DEEP DELETION	0	0	mRNA HIGH	12	0.0226843	mRNA LOW	20	0.0378072	FUSION	0	0	MISSENSE, INFRAME, TRUNCATING MUTATIONS (PUTATIVE DRIVER)	0	0
PROK1	ALL	24	0.0453686	AMPLIFICATION	2	0.00378072	DEEP DELETION	2	0.00378072	mRNA HIGH	20	0.0378072	mRNA LOW	0	0	FUSION	0	0	MISSENSE, INFRAME, TRUNCATING MUTATIONS (PUTATIVE DRIVER)	0	0
PROK2	ALL	24	0.0453686	AMPLIFICATION	2	0.00378072	DEEP DELETION	0	0	mRNA HIGH	22	0.0415879	mRNA LOW	0	0	FUSION	0	0	MISSENSE, INFRAME, TRUNCATING MUTATIONS (PUTATIVE DRIVER)	0	0
PROKR1	ALL	4	0.00756144	AMPLIFICATION	0	0	DEEP DELETION	0	0	mRNA HIGH	4	0.00756144	mRNA LOW	0	0	FUSION	0	0	MISSENSE, INFRAME, TRUNCATING MUTATIONS (PUTATIVE DRIVER)	0	0
PROKR2	ALL	7	0.0132325	AMPLIFICATION	5	0.0094518	DEEP DELETION	0	0	mRNA HIGH	2	0.00378072	mRNA LOW	0	0	FUSION	0	0	MISSENSE, INFRAME, TRUNCATING MUTATIONS (PUTATIVE DRIVER)	0	0
PROX1	ALL	30	0.0567108	AMPLIFICATION	9	0.0170132	DEEP DELETION	0	0	mRNA HIGH	21	0.0396975	mRNA LOW	0	0	FUSION	0	0	MISSENSE, INFRAME, TRUNCATING MUTATIONS (PUTATIVE DRIVER)	0	0
PSPC1	ALL	16	0.0302457	AMPLIFICATION	0	0	DEEP DELETION	2	0.00378072	mRNA HIGH	0	0	mRNA LOW	14	0.026465	FUSION	0	0	MISSENSE, INFRAME, TRUNCATING MUTATIONS (PUTATIVE DRIVER)	0	0
PTEN	ALL	374	0.706994	AMPLIFICATION	3	0.00567108	DEEP DELETION	19	0.0359168	mRNA HIGH	2	0.00378072	mRNA LOW	19	0.0359168	FUSION	1	0.00189036	MISSENSE, INFRAME, TRUNCATING MUTATIONS (PUTATIVE DRIVER)	330	0.623819
PTGDS	ALL	31	0.0586011	AMPLIFICATION	11	0.020794	DEEP DELETION	0	0	mRNA HIGH	6	0.0113422	mRNA LOW	14	0.026465	FUSION	0	0	MISSENSE, INFRAME, TRUNCATING MUTATIONS (PUTATIVE DRIVER)	0	0
PTGER3	ALL	18	0.0340265	AMPLIFICATION	2	0.00378072	DEEP DELETION	0	0	mRNA HIGH	16	0.0302457	mRNA LOW	0	0	FUSION	0	0	MISSENSE, INFRAME, TRUNCATING MUTATIONS (PUTATIVE DRIVER)	0	0
PTGER4	ALL	43	0.0812854	AMPLIFICATION	13	0.0245747	DEEP DELETION	0	0	mRNA HIGH	15	0.0283554	mRNA LOW	15	0.0283554	FUSION	0	0	MISSENSE, INFRAME, TRUNCATING MUTATIONS (PUTATIVE DRIVER)	0	0
RAI1	ALL	29	0.0548204	AMPLIFICATION	7	0.0132325	DEEP DELETION	3	0.00567108	mRNA HIGH	4	0.00756144	mRNA LOW	14	0.026465	FUSION	1	0.00189036	MISSENSE, INFRAME, TRUNCATING MUTATIONS (PUTATIVE DRIVER)	0	0
RBM4	ALL	37	0.0699433	AMPLIFICATION	10	0.0189036	DEEP DELETION	1	0.00189036	mRNA HIGH	19	0.0359168	mRNA LOW	7	0.0132325	FUSION	0	0	MISSENSE, INFRAME, TRUNCATING MUTATIONS (PUTATIVE DRIVER)	0	0
RBM4B	ALL	35	0.0661626	AMPLIFICATION	10	0.0189036	DEEP DELETION	1	0.00189036	mRNA HIGH	18	0.0340265	mRNA LOW	6	0.0113422	FUSION	0	0	MISSENSE, INFRAME, TRUNCATING MUTATIONS (PUTATIVE DRIVER)	0	0
RELB	ALL	34	0.0642722	AMPLIFICATION	9	0.0170132	DEEP DELETION	1	0.00189036	mRNA HIGH	15	0.0283554	mRNA LOW	9	0.0170132	FUSION	0	0	MISSENSE, INFRAME, TRUNCATING MUTATIONS (PUTATIVE DRIVER)	0	0
ROCK2	ALL	30	0.0567108	AMPLIFICATION	6	0.0113422	DEEP DELETION	0	0	mRNA HIGH	1	0.00189036	mRNA LOW	23	0.0434783	FUSION	0	0	MISSENSE, INFRAME, TRUNCATING MUTATIONS (PUTATIVE DRIVER)	0	0
RORA	ALL	30	0.0567108	AMPLIFICATION	5	0.0094518	DEEP DELETION	2	0.00378072	mRNA HIGH	8	0.0151229	mRNA LOW	15	0.0283554	FUSION	0	0	MISSENSE, INFRAME, TRUNCATING MUTATIONS (PUTATIVE DRIVER)	0	0
RORB	ALL	18	0.0340265	AMPLIFICATION	1	0.00189036	DEEP DELETION	0	0	mRNA HIGH	17	0.0321361	mRNA LOW	0	0	FUSION	0	0	MISSENSE, INFRAME, TRUNCATING MUTATIONS (PUTATIVE DRIVER)	0	0
RORC	ALL	63	0.119093	AMPLIFICATION	34	0.0642722	DEEP DELETION	0	0	mRNA HIGH	0	0	mRNA LOW	28	0.0529301	FUSION	1	0.00189036	MISSENSE, INFRAME, TRUNCATING MUTATIONS (PUTATIVE DRIVER)	0	0
SETX	ALL	22	0.0415879	AMPLIFICATION	1	0.00189036	DEEP DELETION	0	0	mRNA HIGH	7	0.0132325	mRNA LOW	14	0.026465	FUSION	0	0	MISSENSE, INFRAME, TRUNCATING MUTATIONS (PUTATIVE DRIVER)	0	0
SFPQ	ALL	35	0.0661626	AMPLIFICATION	5	0.0094518	DEEP DELETION	0	0	mRNA HIGH	19	0.0359168	mRNA LOW	11	0.020794	FUSION	0	0	MISSENSE, INFRAME, TRUNCATING MUTATIONS (PUTATIVE DRIVER)	0	0
SIAH2	ALL	40	0.0756144	AMPLIFICATION	12	0.0226843	DEEP DELETION	1	0.00189036	mRNA HIGH	21	0.0396975	mRNA LOW	6	0.0113422	FUSION	0	0	MISSENSE, INFRAME, TRUNCATING MUTATIONS (PUTATIVE DRIVER)	0	0
SIK1	ALL	34	0.0642722	AMPLIFICATION	4	0.00756144	DEEP DELETION	0	0	mRNA HIGH	21	0.0396975	mRNA LOW	9	0.0170132	FUSION	0	0	MISSENSE, INFRAME, TRUNCATING MUTATIONS (PUTATIVE DRIVER)	0	0
SIN3A	ALL	27	0.0510397	AMPLIFICATION	4	0.00756144	DEEP DELETION	0	0	mRNA HIGH	7	0.0132325	mRNA LOW	16	0.0302457	FUSION	0	0	MISSENSE, INFRAME, TRUNCATING MUTATIONS (PUTATIVE DRIVER)	0	0
SIRT1	ALL	29	0.0548204	AMPLIFICATION	2	0.00378072	DEEP DELETION	0	0	mRNA HIGH	1	0.00189036	mRNA LOW	26	0.0491493	FUSION	0	0	MISSENSE, INFRAME, TRUNCATING MUTATIONS (PUTATIVE DRIVER)	0	0
SIX3	ALL	22	0.0415879	AMPLIFICATION	3	0.00567108	DEEP DELETION	1	0.00189036	mRNA HIGH	18	0.0340265	mRNA LOW	0	0	FUSION	0	0	MISSENSE, INFRAME, TRUNCATING MUTATIONS (PUTATIVE DRIVER)	0	0
SLC6A4	ALL	26	0.0491493	AMPLIFICATION	3	0.00567108	DEEP DELETION	1	0.00189036	mRNA HIGH	22	0.0415879	mRNA LOW	0	0	FUSION	0	0	MISSENSE, INFRAME, TRUNCATING MUTATIONS (PUTATIVE DRIVER)	0	0
SOX14	ALL	17	0.0321361	AMPLIFICATION	9	0.0170132	DEEP DELETION	1	0.00189036	mRNA HIGH	7	0.0132325	mRNA LOW	0	0	FUSION	0	0	MISSENSE, INFRAME, TRUNCATING MUTATIONS (PUTATIVE DRIVER)	0	0
SPSB4	ALL	32	0.0604915	AMPLIFICATION	9	0.0170132	DEEP DELETION	0	0	mRNA HIGH	23	0.0434783	mRNA LOW	0	0	FUSION	0	0	MISSENSE, INFRAME, TRUNCATING MUTATIONS (PUTATIVE DRIVER)	0	0
SRRD	ALL	31	0.0586011	AMPLIFICATION	2	0.00378072	DEEP DELETION	1	0.00189036	mRNA HIGH	17	0.0321361	mRNA LOW	11	0.020794	FUSION	0	0	MISSENSE, INFRAME, TRUNCATING MUTATIONS (PUTATIVE DRIVER)	0	0
SUV39H1	ALL	33	0.0623819	AMPLIFICATION	9	0.0170132	DEEP DELETION	1	0.00189036	mRNA HIGH	16	0.0302457	mRNA LOW	7	0.0132325	FUSION	0	0	MISSENSE, INFRAME, TRUNCATING MUTATIONS (PUTATIVE DRIVER)	0	0
SUV39H2	ALL	27	0.0510397	AMPLIFICATION	3	0.00567108	DEEP DELETION	0	0	mRNA HIGH	6	0.0113422	mRNA LOW	18	0.0340265	FUSION	0	0	MISSENSE, INFRAME, TRUNCATING MUTATIONS (PUTATIVE DRIVER)	0	0
TARDBP	ALL	33	0.0623819	AMPLIFICATION	8	0.0151229	DEEP DELETION	2	0.00378072	mRNA HIGH	19	0.0359168	mRNA LOW	4	0.00756144	FUSION	0	0	MISSENSE, INFRAME, TRUNCATING MUTATIONS (PUTATIVE DRIVER)	0	0
THRAP3	ALL	33	0.0623819	AMPLIFICATION	11	0.020794	DEEP DELETION	0	0	mRNA HIGH	4	0.00756144	mRNA LOW	17	0.0321361	FUSION	1	0.00189036	MISSENSE, INFRAME, TRUNCATING MUTATIONS (PUTATIVE DRIVER)	0	0
TIMELESS	ALL	31	0.0586011	AMPLIFICATION	4	0.00756144	DEEP DELETION	0	0	mRNA HIGH	11	0.020794	mRNA LOW	16	0.0302457	FUSION	0	0	MISSENSE, INFRAME, TRUNCATING MUTATIONS (PUTATIVE DRIVER)	0	0
TNFRSF11A	ALL	20	0.0378072	AMPLIFICATION	0	0	DEEP DELETION	3	0.00567108	mRNA HIGH	7	0.0132325	mRNA LOW	10	0.0189036	FUSION	0	0	MISSENSE, INFRAME, TRUNCATING MUTATIONS (PUTATIVE DRIVER)	0	0
TOP1	ALL	42	0.0793951	AMPLIFICATION	5	0.0094518	DEEP DELETION	0	0	mRNA HIGH	3	0.00567108	mRNA LOW	25	0.047259	FUSION	0	0	MISSENSE, INFRAME, TRUNCATING MUTATIONS (PUTATIVE DRIVER)	9	0.0170132
TOP2A	ALL	36	0.0680529	AMPLIFICATION	9	0.0170132	DEEP DELETION	1	0.00189036	mRNA HIGH	5	0.0094518	mRNA LOW	21	0.0396975	FUSION	0	0	MISSENSE, INFRAME, TRUNCATING MUTATIONS (PUTATIVE DRIVER)	0	0
TP53	ALL	233	0.440454	AMPLIFICATION	1	0.00189036	DEEP DELETION	2	0.00378072	mRNA HIGH	2	0.00378072	mRNA LOW	36	0.0680529	FUSION	0	0	MISSENSE, INFRAME, TRUNCATING MUTATIONS (PUTATIVE DRIVER)	192	0.362949
UBE3A	ALL	29	0.0548204	AMPLIFICATION	0	0	DEEP DELETION	2	0.00378072	mRNA HIGH	4	0.00756144	mRNA LOW	23	0.0434783	FUSION	0	0	MISSENSE, INFRAME, TRUNCATING MUTATIONS (PUTATIVE DRIVER)	0	0
USP2	ALL	26	0.0491493	AMPLIFICATION	4	0.00756144	DEEP DELETION	2	0.00378072	mRNA HIGH	10	0.0189036	mRNA LOW	10	0.0189036	FUSION	0	0	MISSENSE, INFRAME, TRUNCATING MUTATIONS (PUTATIVE DRIVER)	0	0
USP7	ALL	35	0.0661626	AMPLIFICATION	1	0.00189036	DEEP DELETION	0	0	mRNA HIGH	11	0.020794	mRNA LOW	23	0.0434783	FUSION	0	0	MISSENSE, INFRAME, TRUNCATING MUTATIONS (PUTATIVE DRIVER)	0	0
USP9X	ALL	33	0.0623819	AMPLIFICATION	0	0	DEEP DELETION	3	0.00567108	mRNA HIGH	7	0.0132325	mRNA LOW	22	0.0415879	FUSION	1	0.00189036	MISSENSE, INFRAME, TRUNCATING MUTATIONS (PUTATIVE DRIVER)	0	0
UTS2	ALL	19	0.0359168	AMPLIFICATION	3	0.00567108	DEEP DELETION	2	0.00378072	mRNA HIGH	14	0.026465	mRNA LOW	0	0	FUSION	0	0	MISSENSE, INFRAME, TRUNCATING MUTATIONS (PUTATIVE DRIVER)	0	0
UTS2R	ALL	16	0.0302457	AMPLIFICATION	9	0.0170132	DEEP DELETION	1	0.00189036	mRNA HIGH	6	0.0113422	mRNA LOW	0	0	FUSION	0	0	MISSENSE, INFRAME, TRUNCATING MUTATIONS (PUTATIVE DRIVER)	0	0
ZFHX3	ALL	110	0.20794	AMPLIFICATION	3	0.00567108	DEEP DELETION	13	0.0245747	mRNA HIGH	10	0.0189036	mRNA LOW	16	0.0302457	FUSION	0	0	MISSENSE, INFRAME, TRUNCATING MUTATIONS (PUTATIVE DRIVER)	68	0.128544
ZPBP2	ALL	22	0.0415879	AMPLIFICATION	18	0.0340265	DEEP DELETION	1	0.00189036	mRNA HIGH	3	0.00567108	mRNA LOW	0	0	FUSION	0	0	MISSENSE, INFRAME, TRUNCATING MUTATIONS (PUTATIVE DRIVER)	0	0

## Sheet: ST_7
Supplementary Table 7. Frequency of alterations belonging to 499 individuals with TCGA-THCA
GENE	TYPE	TOTAL	f	TYPE	TOTAL	f	TYPE	TOTAL	f	TYPE	TOTAL	f	TYPE	TOTAL	f	TYPE	TOTAL	f	TYPE	TOTAL	f
AANAT	All	19	0.0380762	AMPLIFICATION	1	0.00200401	DEEP DELETION	0	0	mRNA HIGH	18	0.0360721	mRNA LOW	0	0	FUSION	0	0	MISSENSE, INFRAME, TRUNCATING MUTATIONS (PUTATIVE DRIVER)	0	0
ADA	All	20	0.0400802	AMPLIFICATION	0	0	DEEP DELETION	0	0	mRNA HIGH	10	0.0200401	mRNA LOW	10	0.0200401	FUSION	0	0	MISSENSE, INFRAME, TRUNCATING MUTATIONS (PUTATIVE DRIVER)	0	0
ADCY1	All	20	0.0400802	AMPLIFICATION	0	0	DEEP DELETION	0	0	mRNA HIGH	15	0.0300601	mRNA LOW	5	0.01002	FUSION	0	0	MISSENSE, INFRAME, TRUNCATING MUTATIONS (PUTATIVE DRIVER)	0	0
ADORA1	All	24	0.0480962	AMPLIFICATION	1	0.00200401	DEEP DELETION	0	0	mRNA HIGH	1	0.00200401	mRNA LOW	22	0.0440882	FUSION	0	0	MISSENSE, INFRAME, TRUNCATING MUTATIONS (PUTATIVE DRIVER)	0	0
ADORA2A	All	23	0.0460922	AMPLIFICATION	0	0	DEEP DELETION	0	0	mRNA HIGH	15	0.0300601	mRNA LOW	8	0.0160321	FUSION	0	0	MISSENSE, INFRAME, TRUNCATING MUTATIONS (PUTATIVE DRIVER)	0	0
ADRB1	All	27	0.0541082	AMPLIFICATION	0	0	DEEP DELETION	0	0	mRNA HIGH	20	0.0400802	mRNA LOW	7	0.0140281	FUSION	0	0	MISSENSE, INFRAME, TRUNCATING MUTATIONS (PUTATIVE DRIVER)	0	0
AHCY	All	28	0.0561122	AMPLIFICATION	0	0	DEEP DELETION	0	0	mRNA HIGH	21	0.0420842	mRNA LOW	7	0.0140281	FUSION	0	0	MISSENSE, INFRAME, TRUNCATING MUTATIONS (PUTATIVE DRIVER)	0	0
AHR	All	13	0.0260521	AMPLIFICATION	1	0.00200401	DEEP DELETION	0	0	mRNA HIGH	2	0.00400802	mRNA LOW	10	0.0200401	FUSION	0	0	MISSENSE, INFRAME, TRUNCATING MUTATIONS (PUTATIVE DRIVER)	0	0
ALB	All	14	0.0280561	AMPLIFICATION	0	0	DEEP DELETION	0	0	mRNA HIGH	14	0.0280561	mRNA LOW	0	0	FUSION	0	0	MISSENSE, INFRAME, TRUNCATING MUTATIONS (PUTATIVE DRIVER)	0	0
ANKFN1	All	4	0.00801603	AMPLIFICATION	1	0.00200401	DEEP DELETION	0	0	mRNA HIGH	3	0.00601202	mRNA LOW	0	0	FUSION	0	0	MISSENSE, INFRAME, TRUNCATING MUTATIONS (PUTATIVE DRIVER)	0	0
ARNTL	All	17	0.0340681	AMPLIFICATION	0	0	DEEP DELETION	0	0	mRNA HIGH	0	0	mRNA LOW	17	0.0340681	FUSION	0	0	MISSENSE, INFRAME, TRUNCATING MUTATIONS (PUTATIVE DRIVER)	0	0
ARNTL2	All	14	0.0280561	AMPLIFICATION	0	0	DEEP DELETION	0	0	mRNA HIGH	3	0.00601202	mRNA LOW	11	0.0220441	FUSION	0	0	MISSENSE, INFRAME, TRUNCATING MUTATIONS (PUTATIVE DRIVER)	0	0
ASS1	All	32	0.0641283	AMPLIFICATION	1	0.00200401	DEEP DELETION	4	0.00801603	mRNA HIGH	5	0.01002	mRNA LOW	22	0.0440882	FUSION	0	0	MISSENSE, INFRAME, TRUNCATING MUTATIONS (PUTATIVE DRIVER)	0	0
ATF4	All	22	0.0440882	AMPLIFICATION	0	0	DEEP DELETION	0	0	mRNA HIGH	15	0.0300601	mRNA LOW	7	0.0140281	FUSION	0	0	MISSENSE, INFRAME, TRUNCATING MUTATIONS (PUTATIVE DRIVER)	0	0
ATG7	All	28	0.0561122	AMPLIFICATION	0	0	DEEP DELETION	0	0	mRNA HIGH	20	0.0400802	mRNA LOW	8	0.0160321	FUSION	0	0	MISSENSE, INFRAME, TRUNCATING MUTATIONS (PUTATIVE DRIVER)	0	0
ATOH7	All	23	0.0460922	AMPLIFICATION	0	0	DEEP DELETION	3	0.00601202	mRNA HIGH	20	0.0400802	mRNA LOW	0	0	FUSION	0	0	MISSENSE, INFRAME, TRUNCATING MUTATIONS (PUTATIVE DRIVER)	0	0
BHLHE40	All	28	0.0561122	AMPLIFICATION	0	0	DEEP DELETION	0	0	mRNA HIGH	4	0.00801603	mRNA LOW	24	0.0480962	FUSION	0	0	MISSENSE, INFRAME, TRUNCATING MUTATIONS (PUTATIVE DRIVER)	0	0
BHLHE41	All	18	0.0360721	AMPLIFICATION	0	0	DEEP DELETION	0	0	mRNA HIGH	1	0.00200401	mRNA LOW	17	0.0340681	FUSION	0	0	MISSENSE, INFRAME, TRUNCATING MUTATIONS (PUTATIVE DRIVER)	0	0
BTBD9	All	21	0.0420842	AMPLIFICATION	0	0	DEEP DELETION	1	0.00200401	mRNA HIGH	7	0.0140281	mRNA LOW	13	0.0260521	FUSION	0	0	MISSENSE, INFRAME, TRUNCATING MUTATIONS (PUTATIVE DRIVER)	0	0
BTRC	All	24	0.0480962	AMPLIFICATION	0	0	DEEP DELETION	0	0	mRNA HIGH	7	0.0140281	mRNA LOW	17	0.0340681	FUSION	0	0	MISSENSE, INFRAME, TRUNCATING MUTATIONS (PUTATIVE DRIVER)	0	0
CARTPT	All	17	0.0340681	AMPLIFICATION	0	0	DEEP DELETION	0	0	mRNA HIGH	17	0.0340681	mRNA LOW	0	0	FUSION	0	0	MISSENSE, INFRAME, TRUNCATING MUTATIONS (PUTATIVE DRIVER)	0	0
CASP1	All	17	0.0340681	AMPLIFICATION	0	0	DEEP DELETION	0	0	mRNA HIGH	12	0.0240481	mRNA LOW	5	0.01002	FUSION	0	0	MISSENSE, INFRAME, TRUNCATING MUTATIONS (PUTATIVE DRIVER)	0	0
CAVIN3	All	21	0.0420842	AMPLIFICATION	0	0	DEEP DELETION	0	0	mRNA HIGH	9	0.0180361	mRNA LOW	12	0.0240481	FUSION	0	0	MISSENSE, INFRAME, TRUNCATING MUTATIONS (PUTATIVE DRIVER)	0	0
CCAR2	All	27	0.0541082	AMPLIFICATION	0	0	DEEP DELETION	0	0	mRNA HIGH	12	0.0240481	mRNA LOW	15	0.0300601	FUSION	0	0	MISSENSE, INFRAME, TRUNCATING MUTATIONS (PUTATIVE DRIVER)	0	0
CDK1	All	23	0.0460922	AMPLIFICATION	0	0	DEEP DELETION	2	0.00400802	mRNA HIGH	11	0.0220441	mRNA LOW	10	0.0200401	FUSION	0	0	MISSENSE, INFRAME, TRUNCATING MUTATIONS (PUTATIVE DRIVER)	0	0
CHRNB2	All	44	0.0881764	AMPLIFICATION	0	0	DEEP DELETION	0	0	mRNA HIGH	16	0.0320641	mRNA LOW	28	0.0561122	FUSION	0	0	MISSENSE, INFRAME, TRUNCATING MUTATIONS (PUTATIVE DRIVER)	0	0
CIART	All	29	0.0581162	AMPLIFICATION	0	0	DEEP DELETION	0	0	mRNA HIGH	10	0.0200401	mRNA LOW	19	0.0380762	FUSION	0	0	MISSENSE, INFRAME, TRUNCATING MUTATIONS (PUTATIVE DRIVER)	0	0
CIPC	All	30	0.0601202	AMPLIFICATION	0	0	DEEP DELETION	0	0	mRNA HIGH	15	0.0300601	mRNA LOW	15	0.0300601	FUSION	0	0	MISSENSE, INFRAME, TRUNCATING MUTATIONS (PUTATIVE DRIVER)	0	0
CLOCK	All	28	0.0561122	AMPLIFICATION	0	0	DEEP DELETION	0	0	mRNA HIGH	1	0.00200401	mRNA LOW	27	0.0541082	FUSION	0	0	MISSENSE, INFRAME, TRUNCATING MUTATIONS (PUTATIVE DRIVER)	0	0
CORT	All	32	0.0641283	AMPLIFICATION	0	0	DEEP DELETION	0	0	mRNA HIGH	19	0.0380762	mRNA LOW	13	0.0260521	FUSION	0	0	MISSENSE, INFRAME, TRUNCATING MUTATIONS (PUTATIVE DRIVER)	0	0
CREB1	All	21	0.0420842	AMPLIFICATION	0	0	DEEP DELETION	0	0	mRNA HIGH	2	0.00400802	mRNA LOW	19	0.0380762	FUSION	0	0	MISSENSE, INFRAME, TRUNCATING MUTATIONS (PUTATIVE DRIVER)	0	0
CREM	All	24	0.0480962	AMPLIFICATION	0	0	DEEP DELETION	0	0	mRNA HIGH	19	0.0380762	mRNA LOW	5	0.01002	FUSION	0	0	MISSENSE, INFRAME, TRUNCATING MUTATIONS (PUTATIVE DRIVER)	0	0
CRTC1	All	21	0.0420842	AMPLIFICATION	0	0	DEEP DELETION	1	0.00200401	mRNA HIGH	8	0.0160321	mRNA LOW	12	0.0240481	FUSION	0	0	MISSENSE, INFRAME, TRUNCATING MUTATIONS (PUTATIVE DRIVER)	0	0
CRY1	All	23	0.0460922	AMPLIFICATION	0	0	DEEP DELETION	0	0	mRNA HIGH	10	0.0200401	mRNA LOW	13	0.0260521	FUSION	0	0	MISSENSE, INFRAME, TRUNCATING MUTATIONS (PUTATIVE DRIVER)	0	0
CRY2	All	18	0.0360721	AMPLIFICATION	0	0	DEEP DELETION	0	0	mRNA HIGH	9	0.0180361	mRNA LOW	9	0.0180361	FUSION	0	0	MISSENSE, INFRAME, TRUNCATING MUTATIONS (PUTATIVE DRIVER)	0	0
CSF2	All	70	0.140281	AMPLIFICATION	1	0.00200401	DEEP DELETION	0	0	mRNA HIGH	6	0.012024	mRNA LOW	63	0.126253	FUSION	0	0	MISSENSE, INFRAME, TRUNCATING MUTATIONS (PUTATIVE DRIVER)	0	0
CSNK1D	All	29	0.0581162	AMPLIFICATION	1	0.00200401	DEEP DELETION	0	0	mRNA HIGH	11	0.0220441	mRNA LOW	17	0.0340681	FUSION	0	0	MISSENSE, INFRAME, TRUNCATING MUTATIONS (PUTATIVE DRIVER)	0	0
CSNK1E	All	25	0.0501002	AMPLIFICATION	0	0	DEEP DELETION	0	0	mRNA HIGH	6	0.012024	mRNA LOW	19	0.0380762	FUSION	0	0	MISSENSE, INFRAME, TRUNCATING MUTATIONS (PUTATIVE DRIVER)	0	0
CYP7B1	All	20	0.0400802	AMPLIFICATION	0	0	DEEP DELETION	0	0	mRNA HIGH	8	0.0160321	mRNA LOW	12	0.0240481	FUSION	0	0	MISSENSE, INFRAME, TRUNCATING MUTATIONS (PUTATIVE DRIVER)	0	0
DBP	All	24	0.0480962	AMPLIFICATION	0	0	DEEP DELETION	0	0	mRNA HIGH	10	0.0200401	mRNA LOW	14	0.0280561	FUSION	0	0	MISSENSE, INFRAME, TRUNCATING MUTATIONS (PUTATIVE DRIVER)	0	0
DDB1	All	22	0.0440882	AMPLIFICATION	0	0	DEEP DELETION	0	0	mRNA HIGH	5	0.01002	mRNA LOW	17	0.0340681	FUSION	0	0	MISSENSE, INFRAME, TRUNCATING MUTATIONS (PUTATIVE DRIVER)	0	0
DDX5	All	20	0.0400802	AMPLIFICATION	1	0.00200401	DEEP DELETION	0	0	mRNA HIGH	10	0.0200401	mRNA LOW	9	0.0180361	FUSION	0	0	MISSENSE, INFRAME, TRUNCATING MUTATIONS (PUTATIVE DRIVER)	0	0
DHX9	All	23	0.0460922	AMPLIFICATION	1	0.00200401	DEEP DELETION	0	0	mRNA HIGH	0	0	mRNA LOW	22	0.0440882	FUSION	0	0	MISSENSE, INFRAME, TRUNCATING MUTATIONS (PUTATIVE DRIVER)	0	0
DPYD	All	32	0.0641283	AMPLIFICATION	0	0	DEEP DELETION	0	0	mRNA HIGH	5	0.01002	mRNA LOW	27	0.0541082	FUSION	0	0	MISSENSE, INFRAME, TRUNCATING MUTATIONS (PUTATIVE DRIVER)	0	0
DRD1	All	18	0.0360721	AMPLIFICATION	1	0.00200401	DEEP DELETION	0	0	mRNA HIGH	17	0.0340681	mRNA LOW	0	0	FUSION	0	0	MISSENSE, INFRAME, TRUNCATING MUTATIONS (PUTATIVE DRIVER)	0	0
DRD2	All	21	0.0420842	AMPLIFICATION	0	0	DEEP DELETION	0	0	mRNA HIGH	21	0.0420842	mRNA LOW	0	0	FUSION	0	0	MISSENSE, INFRAME, TRUNCATING MUTATIONS (PUTATIVE DRIVER)	0	0
DRD3	All	463	0.927856	AMPLIFICATION	0	0	DEEP DELETION	0	0	mRNA HIGH	2	0.00400802	mRNA LOW	461	0.923848	FUSION	0	0	MISSENSE, INFRAME, TRUNCATING MUTATIONS (PUTATIVE DRIVER)	0	0
DRD4	All	24	0.0480962	AMPLIFICATION	0	0	DEEP DELETION	1	0.00200401	mRNA HIGH	18	0.0360721	mRNA LOW	5	0.01002	FUSION	0	0	MISSENSE, INFRAME, TRUNCATING MUTATIONS (PUTATIVE DRIVER)	0	0
DYRK1A	All	24	0.0480962	AMPLIFICATION	0	0	DEEP DELETION	0	0	mRNA HIGH	4	0.00801603	mRNA LOW	20	0.0400802	FUSION	0	0	MISSENSE, INFRAME, TRUNCATING MUTATIONS (PUTATIVE DRIVER)	0	0
EGR1	All	25	0.0501002	AMPLIFICATION	1	0.00200401	DEEP DELETION	0	0	mRNA HIGH	8	0.0160321	mRNA LOW	16	0.0320641	FUSION	0	0	MISSENSE, INFRAME, TRUNCATING MUTATIONS (PUTATIVE DRIVER)	0	0
EP300	All	23	0.0460922	AMPLIFICATION	0	0	DEEP DELETION	0	0	mRNA HIGH	0	0	mRNA LOW	23	0.0460922	FUSION	0	0	MISSENSE, INFRAME, TRUNCATING MUTATIONS (PUTATIVE DRIVER)	0	0
EZH2	All	26	0.0521042	AMPLIFICATION	0	0	DEEP DELETION	0	0	mRNA HIGH	6	0.012024	mRNA LOW	20	0.0400802	FUSION	0	0	MISSENSE, INFRAME, TRUNCATING MUTATIONS (PUTATIVE DRIVER)	0	0
FBXL3	All	28	0.0561122	AMPLIFICATION	0	0	DEEP DELETION	1	0.00200401	mRNA HIGH	6	0.012024	mRNA LOW	21	0.0420842	FUSION	0	0	MISSENSE, INFRAME, TRUNCATING MUTATIONS (PUTATIVE DRIVER)	0	0
FBXL6	All	31	0.0621242	AMPLIFICATION	1	0.00200401	DEEP DELETION	2	0.00400802	mRNA HIGH	17	0.0340681	mRNA LOW	11	0.0220441	FUSION	0	0	MISSENSE, INFRAME, TRUNCATING MUTATIONS (PUTATIVE DRIVER)	0	0
FBXL8	All	23	0.0460922	AMPLIFICATION	0	0	DEEP DELETION	0	0	mRNA HIGH	10	0.0200401	mRNA LOW	13	0.0260521	FUSION	0	0	MISSENSE, INFRAME, TRUNCATING MUTATIONS (PUTATIVE DRIVER)	0	0
FBXL12	All	23	0.0460922	AMPLIFICATION	0	0	DEEP DELETION	0	0	mRNA HIGH	8	0.0160321	mRNA LOW	15	0.0300601	FUSION	0	0	MISSENSE, INFRAME, TRUNCATING MUTATIONS (PUTATIVE DRIVER)	0	0
FBXL17	All	25	0.0501002	AMPLIFICATION	0	0	DEEP DELETION	0	0	mRNA HIGH	20	0.0400802	mRNA LOW	5	0.01002	FUSION	0	0	MISSENSE, INFRAME, TRUNCATING MUTATIONS (PUTATIVE DRIVER)	0	0
FBXL21P	All	17	0.0340681	AMPLIFICATION	1	0.00200401	DEEP DELETION	0	0	mRNA HIGH	16	0.0320641	mRNA LOW	0	0	FUSION	0	0	MISSENSE, INFRAME, TRUNCATING MUTATIONS (PUTATIVE DRIVER)	0	0
FBXL22	All	21	0.0420842	AMPLIFICATION	0	0	DEEP DELETION	0	0	mRNA HIGH	6	0.012024	mRNA LOW	15	0.0300601	FUSION	0	0	MISSENSE, INFRAME, TRUNCATING MUTATIONS (PUTATIVE DRIVER)	0	0
FBXW7	All	23	0.0460922	AMPLIFICATION	0	0	DEEP DELETION	1	0.00200401	mRNA HIGH	14	0.0280561	mRNA LOW	7	0.0140281	FUSION	0	0	MISSENSE, INFRAME, TRUNCATING MUTATIONS (PUTATIVE DRIVER)	1	0.00200401
FBXW11	All	28	0.0561122	AMPLIFICATION	1	0.00200401	DEEP DELETION	0	0	mRNA HIGH	4	0.00801603	mRNA LOW	23	0.0460922	FUSION	0	0	MISSENSE, INFRAME, TRUNCATING MUTATIONS (PUTATIVE DRIVER)	0	0
GABRB3	All	15	0.0300601	AMPLIFICATION	0	0	DEEP DELETION	0	0	mRNA HIGH	4	0.00801603	mRNA LOW	11	0.0220441	FUSION	0	0	MISSENSE, INFRAME, TRUNCATING MUTATIONS (PUTATIVE DRIVER)	0	0
GFPT1	All	27	0.0541082	AMPLIFICATION	0	0	DEEP DELETION	0	0	mRNA HIGH	19	0.0380762	mRNA LOW	8	0.0160321	FUSION	0	0	MISSENSE, INFRAME, TRUNCATING MUTATIONS (PUTATIVE DRIVER)	0	0
GHRH	All	492	0.985972	AMPLIFICATION	0	0	DEEP DELETION	0	0	mRNA HIGH	0	0	mRNA LOW	492	0.985972	FUSION	0	0	MISSENSE, INFRAME, TRUNCATING MUTATIONS (PUTATIVE DRIVER)	0	0
GHRHR	All	2	0.00400802	AMPLIFICATION	0	0	DEEP DELETION	0	0	mRNA HIGH	2	0.00400802	mRNA LOW	0	0	FUSION	0	0	MISSENSE, INFRAME, TRUNCATING MUTATIONS (PUTATIVE DRIVER)	0	0
GHRL	All	19	0.0380762	AMPLIFICATION	0	0	DEEP DELETION	0	0	mRNA HIGH	13	0.0260521	mRNA LOW	6	0.012024	FUSION	0	0	MISSENSE, INFRAME, TRUNCATING MUTATIONS (PUTATIVE DRIVER)	0	0
GPR157	All	36	0.0721443	AMPLIFICATION	0	0	DEEP DELETION	0	0	mRNA HIGH	9	0.0180361	mRNA LOW	27	0.0541082	FUSION	0	0	MISSENSE, INFRAME, TRUNCATING MUTATIONS (PUTATIVE DRIVER)	0	0
GPR176	All	27	0.0541082	AMPLIFICATION	0	0	DEEP DELETION	0	0	mRNA HIGH	4	0.00801603	mRNA LOW	23	0.0460922	FUSION	0	0	MISSENSE, INFRAME, TRUNCATING MUTATIONS (PUTATIVE DRIVER)	0	0
GSK3B	All	22	0.0440882	AMPLIFICATION	0	0	DEEP DELETION	0	0	mRNA HIGH	3	0.00601202	mRNA LOW	19	0.0380762	FUSION	0	0	MISSENSE, INFRAME, TRUNCATING MUTATIONS (PUTATIVE DRIVER)	0	0
HCRTR2	All	6	0.012024	AMPLIFICATION	0	0	DEEP DELETION	0	0	mRNA HIGH	6	0.012024	mRNA LOW	0	0	FUSION	0	0	MISSENSE, INFRAME, TRUNCATING MUTATIONS (PUTATIVE DRIVER)	0	0
HDAC1	All	24	0.0480962	AMPLIFICATION	0	0	DEEP DELETION	0	0	mRNA HIGH	11	0.0220441	mRNA LOW	13	0.0260521	FUSION	0	0	MISSENSE, INFRAME, TRUNCATING MUTATIONS (PUTATIVE DRIVER)	0	0
HDAC2	All	23	0.0460922	AMPLIFICATION	0	0	DEEP DELETION	0	0	mRNA HIGH	9	0.0180361	mRNA LOW	14	0.0280561	FUSION	0	0	MISSENSE, INFRAME, TRUNCATING MUTATIONS (PUTATIVE DRIVER)	0	0
HDAC3	All	32	0.0641283	AMPLIFICATION	1	0.00200401	DEEP DELETION	0	0	mRNA HIGH	13	0.0260521	mRNA LOW	18	0.0360721	FUSION	0	0	MISSENSE, INFRAME, TRUNCATING MUTATIONS (PUTATIVE DRIVER)	0	0
HNF1B	All	23	0.0460922	AMPLIFICATION	1	0.00200401	DEEP DELETION	0	0	mRNA HIGH	22	0.0440882	mRNA LOW	0	0	FUSION	0	0	MISSENSE, INFRAME, TRUNCATING MUTATIONS (PUTATIVE DRIVER)	0	0
HNF4A	All	8	0.0160321	AMPLIFICATION	0	0	DEEP DELETION	0	0	mRNA HIGH	8	0.0160321	mRNA LOW	0	0	FUSION	0	0	MISSENSE, INFRAME, TRUNCATING MUTATIONS (PUTATIVE DRIVER)	0	0
HNRNPD	All	27	0.0541082	AMPLIFICATION	0	0	DEEP DELETION	0	0	mRNA HIGH	14	0.0280561	mRNA LOW	13	0.0260521	FUSION	0	0	MISSENSE, INFRAME, TRUNCATING MUTATIONS (PUTATIVE DRIVER)	0	0
HNRNPU	All	34	0.0681363	AMPLIFICATION	2	0.00400802	DEEP DELETION	0	0	mRNA HIGH	10	0.0200401	mRNA LOW	22	0.0440882	FUSION	0	0	MISSENSE, INFRAME, TRUNCATING MUTATIONS (PUTATIVE DRIVER)	0	0
HS3ST2	All	24	0.0480962	AMPLIFICATION	0	0	DEEP DELETION	0	0	mRNA HIGH	20	0.0400802	mRNA LOW	4	0.00801603	FUSION	0	0	MISSENSE, INFRAME, TRUNCATING MUTATIONS (PUTATIVE DRIVER)	0	0
HTR7	All	29	0.0581162	AMPLIFICATION	0	0	DEEP DELETION	2	0.00400802	mRNA HIGH	16	0.0320641	mRNA LOW	11	0.0220441	FUSION	0	0	MISSENSE, INFRAME, TRUNCATING MUTATIONS (PUTATIVE DRIVER)	0	0
HUWE1	All	23	0.0460922	AMPLIFICATION	1	0.00200401	DEEP DELETION	0	0	mRNA HIGH	7	0.0140281	mRNA LOW	15	0.0300601	FUSION	0	0	MISSENSE, INFRAME, TRUNCATING MUTATIONS (PUTATIVE DRIVER)	0	0
ID1	All	23	0.0460922	AMPLIFICATION	0	0	DEEP DELETION	0	0	mRNA HIGH	9	0.0180361	mRNA LOW	14	0.0280561	FUSION	0	0	MISSENSE, INFRAME, TRUNCATING MUTATIONS (PUTATIVE DRIVER)	0	0
ID2	All	24	0.0480962	AMPLIFICATION	0	0	DEEP DELETION	0	0	mRNA HIGH	9	0.0180361	mRNA LOW	15	0.0300601	FUSION	0	0	MISSENSE, INFRAME, TRUNCATING MUTATIONS (PUTATIVE DRIVER)	0	0
ID3	All	26	0.0521042	AMPLIFICATION	0	0	DEEP DELETION	0	0	mRNA HIGH	16	0.0320641	mRNA LOW	10	0.0200401	FUSION	0	0	MISSENSE, INFRAME, TRUNCATING MUTATIONS (PUTATIVE DRIVER)	0	0
ID4	All	29	0.0581162	AMPLIFICATION	0	0	DEEP DELETION	0	0	mRNA HIGH	12	0.0240481	mRNA LOW	17	0.0340681	FUSION	0	0	MISSENSE, INFRAME, TRUNCATING MUTATIONS (PUTATIVE DRIVER)	0	0
IL6	All	26	0.0521042	AMPLIFICATION	0	0	DEEP DELETION	0	0	mRNA HIGH	19	0.0380762	mRNA LOW	7	0.0140281	FUSION	0	0	MISSENSE, INFRAME, TRUNCATING MUTATIONS (PUTATIVE DRIVER)	0	0
IMPDH2	All	27	0.0541082	AMPLIFICATION	0	0	DEEP DELETION	0	0	mRNA HIGH	17	0.0340681	mRNA LOW	10	0.0200401	FUSION	0	0	MISSENSE, INFRAME, TRUNCATING MUTATIONS (PUTATIVE DRIVER)	0	0
KCNA2	All	21	0.0420842	AMPLIFICATION	0	0	DEEP DELETION	0	0	mRNA HIGH	21	0.0420842	mRNA LOW	0	0	FUSION	0	0	MISSENSE, INFRAME, TRUNCATING MUTATIONS (PUTATIVE DRIVER)	0	0
KCND2	All	19	0.0380762	AMPLIFICATION	0	0	DEEP DELETION	0	0	mRNA HIGH	19	0.0380762	mRNA LOW	0	0	FUSION	0	0	MISSENSE, INFRAME, TRUNCATING MUTATIONS (PUTATIVE DRIVER)	0	0
KCNMA1	All	34	0.0681363	AMPLIFICATION	0	0	DEEP DELETION	5	0.01002	mRNA HIGH	12	0.0240481	mRNA LOW	17	0.0340681	FUSION	0	0	MISSENSE, INFRAME, TRUNCATING MUTATIONS (PUTATIVE DRIVER)	0	0
KDM2A	All	25	0.0501002	AMPLIFICATION	0	0	DEEP DELETION	0	0	mRNA HIGH	6	0.012024	mRNA LOW	19	0.0380762	FUSION	0	0	MISSENSE, INFRAME, TRUNCATING MUTATIONS (PUTATIVE DRIVER)	0	0
KDM5A	All	19	0.0380762	AMPLIFICATION	0	0	DEEP DELETION	1	0.00200401	mRNA HIGH	8	0.0160321	mRNA LOW	10	0.0200401	FUSION	0	0	MISSENSE, INFRAME, TRUNCATING MUTATIONS (PUTATIVE DRIVER)	0	0
KDM5B	All	21	0.0420842	AMPLIFICATION	1	0.00200401	DEEP DELETION	0	0	mRNA HIGH	5	0.01002	mRNA LOW	15	0.0300601	FUSION	0	0	MISSENSE, INFRAME, TRUNCATING MUTATIONS (PUTATIVE DRIVER)	0	0
KDM5C	All	12	0.0240481	AMPLIFICATION	0	0	DEEP DELETION	0	0	mRNA HIGH	0	0	mRNA LOW	12	0.0240481	FUSION	0	0	MISSENSE, INFRAME, TRUNCATING MUTATIONS (PUTATIVE DRIVER)	0	0
KDM8	All	26	0.0521042	AMPLIFICATION	0	0	DEEP DELETION	0	0	mRNA HIGH	8	0.0160321	mRNA LOW	18	0.0360721	FUSION	0	0	MISSENSE, INFRAME, TRUNCATING MUTATIONS (PUTATIVE DRIVER)	0	0
KLF10	All	32	0.0641283	AMPLIFICATION	0	0	DEEP DELETION	1	0.00200401	mRNA HIGH	10	0.0200401	mRNA LOW	21	0.0420842	FUSION	0	0	MISSENSE, INFRAME, TRUNCATING MUTATIONS (PUTATIVE DRIVER)	0	0
KMT2A	All	20	0.0400802	AMPLIFICATION	0	0	DEEP DELETION	0	0	mRNA HIGH	5	0.01002	mRNA LOW	14	0.0280561	FUSION	0	0	MISSENSE, INFRAME, TRUNCATING MUTATIONS (PUTATIVE DRIVER)	1	0.00200401
LEPR	All	28	0.0561122	AMPLIFICATION	0	0	DEEP DELETION	0	0	mRNA HIGH	16	0.0320641	mRNA LOW	12	0.0240481	FUSION	0	0	MISSENSE, INFRAME, TRUNCATING MUTATIONS (PUTATIVE DRIVER)	0	0
LGR4	All	29	0.0581162	AMPLIFICATION	0	0	DEEP DELETION	0	0	mRNA HIGH	9	0.0180361	mRNA LOW	20	0.0400802	FUSION	0	0	MISSENSE, INFRAME, TRUNCATING MUTATIONS (PUTATIVE DRIVER)	0	0
MAGED1	All	29	0.0581162	AMPLIFICATION	0	0	DEEP DELETION	0	0	mRNA HIGH	17	0.0340681	mRNA LOW	12	0.0240481	FUSION	0	0	MISSENSE, INFRAME, TRUNCATING MUTATIONS (PUTATIVE DRIVER)	0	0
MAGEL2	All	28	0.0561122	AMPLIFICATION	0	0	DEEP DELETION	0	0	mRNA HIGH	12	0.0240481	mRNA LOW	16	0.0320641	FUSION	0	0	MISSENSE, INFRAME, TRUNCATING MUTATIONS (PUTATIVE DRIVER)	0	0
MAPK8	All	26	0.0521042	AMPLIFICATION	0	0	DEEP DELETION	3	0.00601202	mRNA HIGH	1	0.00200401	mRNA LOW	22	0.0440882	FUSION	0	0	MISSENSE, INFRAME, TRUNCATING MUTATIONS (PUTATIVE DRIVER)	0	0
MAPK9	All	25	0.0501002	AMPLIFICATION	1	0.00200401	DEEP DELETION	0	0	mRNA HIGH	12	0.0240481	mRNA LOW	12	0.0240481	FUSION	0	0	MISSENSE, INFRAME, TRUNCATING MUTATIONS (PUTATIVE DRIVER)	0	0
MAPK10	All	21	0.0420842	AMPLIFICATION	0	0	DEEP DELETION	0	0	mRNA HIGH	10	0.0200401	mRNA LOW	11	0.0220441	FUSION	0	0	MISSENSE, INFRAME, TRUNCATING MUTATIONS (PUTATIVE DRIVER)	0	0
MAT2A	All	18	0.0360721	AMPLIFICATION	0	0	DEEP DELETION	0	0	mRNA HIGH	15	0.0300601	mRNA LOW	3	0.00601202	FUSION	0	0	MISSENSE, INFRAME, TRUNCATING MUTATIONS (PUTATIVE DRIVER)	0	0
MC3R	All	1	0.00200401	AMPLIFICATION	0	0	DEEP DELETION	0	0	mRNA HIGH	1	0.00200401	mRNA LOW	0	0	FUSION	0	0	MISSENSE, INFRAME, TRUNCATING MUTATIONS (PUTATIVE DRIVER)	0	0
METTL3	All	17	0.0340681	AMPLIFICATION	0	0	DEEP DELETION	0	0	mRNA HIGH	6	0.012024	mRNA LOW	11	0.0220441	FUSION	0	0	MISSENSE, INFRAME, TRUNCATING MUTATIONS (PUTATIVE DRIVER)	0	0
MTA1	All	21	0.0420842	AMPLIFICATION	0	0	DEEP DELETION	0	0	mRNA HIGH	15	0.0300601	mRNA LOW	6	0.012024	FUSION	0	0	MISSENSE, INFRAME, TRUNCATING MUTATIONS (PUTATIVE DRIVER)	0	0
MTNR1A	All	8	0.0160321	AMPLIFICATION	1	0.00200401	DEEP DELETION	0	0	mRNA HIGH	7	0.0140281	mRNA LOW	0	0	FUSION	0	0	MISSENSE, INFRAME, TRUNCATING MUTATIONS (PUTATIVE DRIVER)	0	0
MTNR1B	All	2	0.00400802	AMPLIFICATION	0	0	DEEP DELETION	0	0	mRNA HIGH	2	0.00400802	mRNA LOW	0	0	FUSION	0	0	MISSENSE, INFRAME, TRUNCATING MUTATIONS (PUTATIVE DRIVER)	0	0
MTOR	All	27	0.0541082	AMPLIFICATION	0	0	DEEP DELETION	0	0	mRNA HIGH	9	0.0180361	mRNA LOW	18	0.0360721	FUSION	0	0	MISSENSE, INFRAME, TRUNCATING MUTATIONS (PUTATIVE DRIVER)	0	0
SLC25A19	All	31	0.0621242	AMPLIFICATION	1	0.00200401	DEEP DELETION	0	0	mRNA HIGH	12	0.0240481	mRNA LOW	18	0.0360721	FUSION	0	0	MISSENSE, INFRAME, TRUNCATING MUTATIONS (PUTATIVE DRIVER)	0	0
MYBBP1A	All	22	0.0440882	AMPLIFICATION	0	0	DEEP DELETION	2	0.00400802	mRNA HIGH	6	0.012024	mRNA LOW	14	0.0280561	FUSION	0	0	MISSENSE, INFRAME, TRUNCATING MUTATIONS (PUTATIVE DRIVER)	0	0
MYCBP2	All	23	0.0460922	AMPLIFICATION	0	0	DEEP DELETION	1	0.00200401	mRNA HIGH	1	0.00200401	mRNA LOW	20	0.0400802	FUSION	1	0.00200401	MISSENSE, INFRAME, TRUNCATING MUTATIONS (PUTATIVE DRIVER)	0	0
NAGLU	All	25	0.0501002	AMPLIFICATION	1	0.00200401	DEEP DELETION	0	0	mRNA HIGH	20	0.0400802	mRNA LOW	4	0.00801603	FUSION	0	0	MISSENSE, INFRAME, TRUNCATING MUTATIONS (PUTATIVE DRIVER)	0	0
NAMPT	All	18	0.0360721	AMPLIFICATION	0	0	DEEP DELETION	1	0.00200401	mRNA HIGH	8	0.0160321	mRNA LOW	9	0.0180361	FUSION	0	0	MISSENSE, INFRAME, TRUNCATING MUTATIONS (PUTATIVE DRIVER)	0	0
NCOA2	All	33	0.0661323	AMPLIFICATION	0	0	DEEP DELETION	0	0	mRNA HIGH	0	0	mRNA LOW	33	0.0661323	FUSION	0	0	MISSENSE, INFRAME, TRUNCATING MUTATIONS (PUTATIVE DRIVER)	0	0
NCOR1	All	28	0.0561122	AMPLIFICATION	0	0	DEEP DELETION	1	0.00200401	mRNA HIGH	4	0.00801603	mRNA LOW	22	0.0440882	FUSION	1	0.00200401	MISSENSE, INFRAME, TRUNCATING MUTATIONS (PUTATIVE DRIVER)	0	0
NDUFA9	All	22	0.0440882	AMPLIFICATION	0	0	DEEP DELETION	0	0	mRNA HIGH	21	0.0420842	mRNA LOW	1	0.00200401	FUSION	0	0	MISSENSE, INFRAME, TRUNCATING MUTATIONS (PUTATIVE DRIVER)	0	0
NFIL3	All	30	0.0601202	AMPLIFICATION	0	0	DEEP DELETION	2	0.00400802	mRNA HIGH	12	0.0240481	mRNA LOW	16	0.0320641	FUSION	0	0	MISSENSE, INFRAME, TRUNCATING MUTATIONS (PUTATIVE DRIVER)	0	0
NGFR	All	19	0.0380762	AMPLIFICATION	1	0.00200401	DEEP DELETION	0	0	mRNA HIGH	2	0.00400802	mRNA LOW	16	0.0320641	FUSION	0	0	MISSENSE, INFRAME, TRUNCATING MUTATIONS (PUTATIVE DRIVER)	0	0
NKX2-1	All	22	0.0440882	AMPLIFICATION	0	0	DEEP DELETION	0	0	mRNA HIGH	11	0.0220441	mRNA LOW	11	0.0220441	FUSION	0	0	MISSENSE, INFRAME, TRUNCATING MUTATIONS (PUTATIVE DRIVER)	0	0
NLGN1	All	19	0.0380762	AMPLIFICATION	0	0	DEEP DELETION	0	0	mRNA HIGH	19	0.0380762	mRNA LOW	0	0	FUSION	0	0	MISSENSE, INFRAME, TRUNCATING MUTATIONS (PUTATIVE DRIVER)	0	0
NMS	All	0	0	AMPLIFICATION	0	0	DEEP DELETION	0	0	mRNA HIGH	0	0	mRNA LOW	0	0	FUSION	0	0	MISSENSE, INFRAME, TRUNCATING MUTATIONS (PUTATIVE DRIVER)	0	0
NMU	All	45	0.0901804	AMPLIFICATION	0	0	DEEP DELETION	0	0	mRNA HIGH	7	0.0140281	mRNA LOW	38	0.0761523	FUSION	0	0	MISSENSE, INFRAME, TRUNCATING MUTATIONS (PUTATIVE DRIVER)	0	0
NOCT	All	18	0.0360721	AMPLIFICATION	0	0	DEEP DELETION	0	0	mRNA HIGH	10	0.0200401	mRNA LOW	8	0.0160321	FUSION	0	0	MISSENSE, INFRAME, TRUNCATING MUTATIONS (PUTATIVE DRIVER)	0	0
NONO	All	26	0.0521042	AMPLIFICATION	1	0.00200401	DEEP DELETION	0	0	mRNA HIGH	8	0.0160321	mRNA LOW	17	0.0340681	FUSION	0	0	MISSENSE, INFRAME, TRUNCATING MUTATIONS (PUTATIVE DRIVER)	0	0
NPAS2	All	22	0.0440882	AMPLIFICATION	0	0	DEEP DELETION	0	0	mRNA HIGH	6	0.012024	mRNA LOW	16	0.0320641	FUSION	0	0	MISSENSE, INFRAME, TRUNCATING MUTATIONS (PUTATIVE DRIVER)	0	0
NPS	All	0	0	AMPLIFICATION	0	0	DEEP DELETION	0	0	mRNA HIGH	0	0	mRNA LOW	0	0	FUSION	0	0	MISSENSE, INFRAME, TRUNCATING MUTATIONS (PUTATIVE DRIVER)	0	0
NPY2R	All	5	0.01002	AMPLIFICATION	0	0	DEEP DELETION	0	0	mRNA HIGH	5	0.01002	mRNA LOW	0	0	FUSION	0	0	MISSENSE, INFRAME, TRUNCATING MUTATIONS (PUTATIVE DRIVER)	0	0
NR0B2	All	20	0.0400802	AMPLIFICATION	0	0	DEEP DELETION	0	0	mRNA HIGH	20	0.0400802	mRNA LOW	0	0	FUSION	0	0	MISSENSE, INFRAME, TRUNCATING MUTATIONS (PUTATIVE DRIVER)	0	0
NR1D1	All	27	0.0541082	AMPLIFICATION	1	0.00200401	DEEP DELETION	0	0	mRNA HIGH	5	0.01002	mRNA LOW	21	0.0420842	FUSION	0	0	MISSENSE, INFRAME, TRUNCATING MUTATIONS (PUTATIVE DRIVER)	0	0
NR1D2	All	22	0.0440882	AMPLIFICATION	0	0	DEEP DELETION	0	0	mRNA HIGH	4	0.00801603	mRNA LOW	18	0.0360721	FUSION	0	0	MISSENSE, INFRAME, TRUNCATING MUTATIONS (PUTATIVE DRIVER)	0	0
NR2F6	All	28	0.0561122	AMPLIFICATION	0	0	DEEP DELETION	1	0.00200401	mRNA HIGH	16	0.0320641	mRNA LOW	11	0.0220441	FUSION	0	0	MISSENSE, INFRAME, TRUNCATING MUTATIONS (PUTATIVE DRIVER)	0	0
NRIP1	All	15	0.0300601	AMPLIFICATION	0	0	DEEP DELETION	0	0	mRNA HIGH	9	0.0180361	mRNA LOW	6	0.012024	FUSION	0	0	MISSENSE, INFRAME, TRUNCATING MUTATIONS (PUTATIVE DRIVER)	0	0
OGT	All	28	0.0561122	AMPLIFICATION	1	0.00200401	DEEP DELETION	0	0	mRNA HIGH	10	0.0200401	mRNA LOW	17	0.0340681	FUSION	0	0	MISSENSE, INFRAME, TRUNCATING MUTATIONS (PUTATIVE DRIVER)	0	0
OPN4	All	21	0.0420842	AMPLIFICATION	0	0	DEEP DELETION	3	0.00601202	mRNA HIGH	18	0.0360721	mRNA LOW	0	0	FUSION	0	0	MISSENSE, INFRAME, TRUNCATING MUTATIONS (PUTATIVE DRIVER)	0	0
OPN5	All	12	0.0240481	AMPLIFICATION	0	0	DEEP DELETION	0	0	mRNA HIGH	12	0.0240481	mRNA LOW	0	0	FUSION	0	0	MISSENSE, INFRAME, TRUNCATING MUTATIONS (PUTATIVE DRIVER)	0	0
OPRL1	All	21	0.0420842	AMPLIFICATION	0	0	DEEP DELETION	0	0	mRNA HIGH	7	0.0140281	mRNA LOW	14	0.0280561	FUSION	0	0	MISSENSE, INFRAME, TRUNCATING MUTATIONS (PUTATIVE DRIVER)	0	0
PDE6B	All	25	0.0501002	AMPLIFICATION	1	0.00200401	DEEP DELETION	0	0	mRNA HIGH	12	0.0240481	mRNA LOW	12	0.0240481	FUSION	0	0	MISSENSE, INFRAME, TRUNCATING MUTATIONS (PUTATIVE DRIVER)	0	0
PER1	All	23	0.0460922	AMPLIFICATION	0	0	DEEP DELETION	2	0.00400802	mRNA HIGH	15	0.0300601	mRNA LOW	6	0.012024	FUSION	0	0	MISSENSE, INFRAME, TRUNCATING MUTATIONS (PUTATIVE DRIVER)	0	0
PER2	All	22	0.0440882	AMPLIFICATION	0	0	DEEP DELETION	0	0	mRNA HIGH	8	0.0160321	mRNA LOW	14	0.0280561	FUSION	0	0	MISSENSE, INFRAME, TRUNCATING MUTATIONS (PUTATIVE DRIVER)	0	0
PER3	All	25	0.0501002	AMPLIFICATION	0	0	DEEP DELETION	0	0	mRNA HIGH	6	0.012024	mRNA LOW	19	0.0380762	FUSION	0	0	MISSENSE, INFRAME, TRUNCATING MUTATIONS (PUTATIVE DRIVER)	0	0
PHLPP1	All	21	0.0420842	AMPLIFICATION	0	0	DEEP DELETION	0	0	mRNA HIGH	14	0.0280561	mRNA LOW	7	0.0140281	FUSION	0	0	MISSENSE, INFRAME, TRUNCATING MUTATIONS (PUTATIVE DRIVER)	0	0
PIWIL2	All	20	0.0400802	AMPLIFICATION	0	0	DEEP DELETION	1	0.00200401	mRNA HIGH	19	0.0380762	mRNA LOW	0	0	FUSION	0	0	MISSENSE, INFRAME, TRUNCATING MUTATIONS (PUTATIVE DRIVER)	0	0
PMCH	All	14	0.0280561	AMPLIFICATION	0	0	DEEP DELETION	0	0	mRNA HIGH	14	0.0280561	mRNA LOW	0	0	FUSION	0	0	MISSENSE, INFRAME, TRUNCATING MUTATIONS (PUTATIVE DRIVER)	0	0
PML	All	26	0.0521042	AMPLIFICATION	0	0	DEEP DELETION	0	0	mRNA HIGH	11	0.0220441	mRNA LOW	15	0.0300601	FUSION	0	0	MISSENSE, INFRAME, TRUNCATING MUTATIONS (PUTATIVE DRIVER)	0	0
PPARA	All	22	0.0440882	AMPLIFICATION	0	0	DEEP DELETION	0	0	mRNA HIGH	5	0.01002	mRNA LOW	17	0.0340681	FUSION	0	0	MISSENSE, INFRAME, TRUNCATING MUTATIONS (PUTATIVE DRIVER)	0	0
PPARG	All	22	0.0440882	AMPLIFICATION	0	0	DEEP DELETION	1	0.00200401	mRNA HIGH	13	0.0260521	mRNA LOW	4	0.00801603	FUSION	4	0.00801603	MISSENSE, INFRAME, TRUNCATING MUTATIONS (PUTATIVE DRIVER)	0	0
PPARGC1A	All	18	0.0360721	AMPLIFICATION	0	0	DEEP DELETION	0	0	mRNA HIGH	9	0.0180361	mRNA LOW	9	0.0180361	FUSION	0	0	MISSENSE, INFRAME, TRUNCATING MUTATIONS (PUTATIVE DRIVER)	0	0
PPP1CA	All	27	0.0541082	AMPLIFICATION	0	0	DEEP DELETION	0	0	mRNA HIGH	25	0.0501002	mRNA LOW	2	0.00400802	FUSION	0	0	MISSENSE, INFRAME, TRUNCATING MUTATIONS (PUTATIVE DRIVER)	0	0
PPP1CB	All	24	0.0480962	AMPLIFICATION	0	0	DEEP DELETION	0	0	mRNA HIGH	8	0.0160321	mRNA LOW	16	0.0320641	FUSION	0	0	MISSENSE, INFRAME, TRUNCATING MUTATIONS (PUTATIVE DRIVER)	0	0
PPP1CC	All	20	0.0400802	AMPLIFICATION	0	0	DEEP DELETION	0	0	mRNA HIGH	14	0.0280561	mRNA LOW	6	0.012024	FUSION	0	0	MISSENSE, INFRAME, TRUNCATING MUTATIONS (PUTATIVE DRIVER)	0	0
PRF1	All	33	0.0661323	AMPLIFICATION	0	0	DEEP DELETION	3	0.00601202	mRNA HIGH	17	0.0340681	mRNA LOW	13	0.0260521	FUSION	0	0	MISSENSE, INFRAME, TRUNCATING MUTATIONS (PUTATIVE DRIVER)	0	0
PRKAA1	All	28	0.0561122	AMPLIFICATION	0	0	DEEP DELETION	0	0	mRNA HIGH	5	0.01002	mRNA LOW	23	0.0460922	FUSION	0	0	MISSENSE, INFRAME, TRUNCATING MUTATIONS (PUTATIVE DRIVER)	0	0
PRKAA2	All	27	0.0541082	AMPLIFICATION	0	0	DEEP DELETION	0	0	mRNA HIGH	13	0.0260521	mRNA LOW	14	0.0280561	FUSION	0	0	MISSENSE, INFRAME, TRUNCATING MUTATIONS (PUTATIVE DRIVER)	0	0
PRKCG	All	11	0.0220441	AMPLIFICATION	0	0	DEEP DELETION	0	0	mRNA HIGH	11	0.0220441	mRNA LOW	0	0	FUSION	0	0	MISSENSE, INFRAME, TRUNCATING MUTATIONS (PUTATIVE DRIVER)	0	0
PRKDC	All	26	0.0521042	AMPLIFICATION	0	0	DEEP DELETION	0	0	mRNA HIGH	0	0	mRNA LOW	26	0.0521042	FUSION	0	0	MISSENSE, INFRAME, TRUNCATING MUTATIONS (PUTATIVE DRIVER)	0	0
PRKG1	All	26	0.0521042	AMPLIFICATION	0	0	DEEP DELETION	5	0.01002	mRNA HIGH	2	0.00400802	mRNA LOW	19	0.0380762	FUSION	0	0	MISSENSE, INFRAME, TRUNCATING MUTATIONS (PUTATIVE DRIVER)	0	0
PRKG2	All	15	0.0300601	AMPLIFICATION	0	0	DEEP DELETION	0	0	mRNA HIGH	15	0.0300601	mRNA LOW	0	0	FUSION	0	0	MISSENSE, INFRAME, TRUNCATING MUTATIONS (PUTATIVE DRIVER)	0	0
PRMT5	All	27	0.0541082	AMPLIFICATION	0	0	DEEP DELETION	0	0	mRNA HIGH	4	0.00801603	mRNA LOW	23	0.0460922	FUSION	0	0	MISSENSE, INFRAME, TRUNCATING MUTATIONS (PUTATIVE DRIVER)	0	0
PROK1	All	20	0.0400802	AMPLIFICATION	0	0	DEEP DELETION	0	0	mRNA HIGH	20	0.0400802	mRNA LOW	0	0	FUSION	0	0	MISSENSE, INFRAME, TRUNCATING MUTATIONS (PUTATIVE DRIVER)	0	0
PROK2	All	12	0.0240481	AMPLIFICATION	0	0	DEEP DELETION	0	0	mRNA HIGH	12	0.0240481	mRNA LOW	0	0	FUSION	0	0	MISSENSE, INFRAME, TRUNCATING MUTATIONS (PUTATIVE DRIVER)	0	0
PROKR1	All	3	0.00601202	AMPLIFICATION	0	0	DEEP DELETION	0	0	mRNA HIGH	3	0.00601202	mRNA LOW	0	0	FUSION	0	0	MISSENSE, INFRAME, TRUNCATING MUTATIONS (PUTATIVE DRIVER)	0	0
PROKR2	All	4	0.00801603	AMPLIFICATION	0	0	DEEP DELETION	0	0	mRNA HIGH	4	0.00801603	mRNA LOW	0	0	FUSION	0	0	MISSENSE, INFRAME, TRUNCATING MUTATIONS (PUTATIVE DRIVER)	0	0
PROX1	All	26	0.0521042	AMPLIFICATION	1	0.00200401	DEEP DELETION	0	0	mRNA HIGH	8	0.0160321	mRNA LOW	17	0.0340681	FUSION	0	0	MISSENSE, INFRAME, TRUNCATING MUTATIONS (PUTATIVE DRIVER)	0	0
PSPC1	All	22	0.0440882	AMPLIFICATION	0	0	DEEP DELETION	0	0	mRNA HIGH	4	0.00801603	mRNA LOW	18	0.0360721	FUSION	0	0	MISSENSE, INFRAME, TRUNCATING MUTATIONS (PUTATIVE DRIVER)	0	0
PTEN	All	23	0.0460922	AMPLIFICATION	0	0	DEEP DELETION	5	0.01002	mRNA HIGH	7	0.0140281	mRNA LOW	8	0.0160321	FUSION	1	0.00200401	MISSENSE, INFRAME, TRUNCATING MUTATIONS (PUTATIVE DRIVER)	2	0.00400802
PTGDS	All	28	0.0561122	AMPLIFICATION	1	0.00200401	DEEP DELETION	4	0.00801603	mRNA HIGH	15	0.0300601	mRNA LOW	8	0.0160321	FUSION	0	0	MISSENSE, INFRAME, TRUNCATING MUTATIONS (PUTATIVE DRIVER)	0	0
PTGER3	All	21	0.0420842	AMPLIFICATION	0	0	DEEP DELETION	0	0	mRNA HIGH	10	0.0200401	mRNA LOW	11	0.0220441	FUSION	0	0	MISSENSE, INFRAME, TRUNCATING MUTATIONS (PUTATIVE DRIVER)	0	0
PTGER4	All	28	0.0561122	AMPLIFICATION	0	0	DEEP DELETION	0	0	mRNA HIGH	11	0.0220441	mRNA LOW	17	0.0340681	FUSION	0	0	MISSENSE, INFRAME, TRUNCATING MUTATIONS (PUTATIVE DRIVER)	0	0
RAI1	All	22	0.0440882	AMPLIFICATION	0	0	DEEP DELETION	1	0.00200401	mRNA HIGH	2	0.00400802	mRNA LOW	19	0.0380762	FUSION	0	0	MISSENSE, INFRAME, TRUNCATING MUTATIONS (PUTATIVE DRIVER)	0	0
RBM4	All	23	0.0460922	AMPLIFICATION	0	0	DEEP DELETION	0	0	mRNA HIGH	13	0.0260521	mRNA LOW	10	0.0200401	FUSION	0	0	MISSENSE, INFRAME, TRUNCATING MUTATIONS (PUTATIVE DRIVER)	0	0
RBM4B	All	20	0.0400802	AMPLIFICATION	0	0	DEEP DELETION	0	0	mRNA HIGH	9	0.0180361	mRNA LOW	11	0.0220441	FUSION	0	0	MISSENSE, INFRAME, TRUNCATING MUTATIONS (PUTATIVE DRIVER)	0	0
RELB	All	26	0.0521042	AMPLIFICATION	0	0	DEEP DELETION	0	0	mRNA HIGH	6	0.012024	mRNA LOW	20	0.0400802	FUSION	0	0	MISSENSE, INFRAME, TRUNCATING MUTATIONS (PUTATIVE DRIVER)	0	0
ROCK2	All	25	0.0501002	AMPLIFICATION	0	0	DEEP DELETION	0	0	mRNA HIGH	0	0	mRNA LOW	25	0.0501002	FUSION	0	0	MISSENSE, INFRAME, TRUNCATING MUTATIONS (PUTATIVE DRIVER)	0	0
RORA	All	23	0.0460922	AMPLIFICATION	0	0	DEEP DELETION	0	0	mRNA HIGH	7	0.0140281	mRNA LOW	16	0.0320641	FUSION	0	0	MISSENSE, INFRAME, TRUNCATING MUTATIONS (PUTATIVE DRIVER)	0	0
RORB	All	20	0.0400802	AMPLIFICATION	0	0	DEEP DELETION	1	0.00200401	mRNA HIGH	19	0.0380762	mRNA LOW	0	0	FUSION	0	0	MISSENSE, INFRAME, TRUNCATING MUTATIONS (PUTATIVE DRIVER)	0	0
RORC	All	21	0.0420842	AMPLIFICATION	0	0	DEEP DELETION	0	0	mRNA HIGH	9	0.0180361	mRNA LOW	12	0.0240481	FUSION	0	0	MISSENSE, INFRAME, TRUNCATING MUTATIONS (PUTATIVE DRIVER)	0	0
SETX	All	24	0.0480962	AMPLIFICATION	1	0.00200401	DEEP DELETION	4	0.00801603	mRNA HIGH	6	0.012024	mRNA LOW	13	0.0260521	FUSION	0	0	MISSENSE, INFRAME, TRUNCATING MUTATIONS (PUTATIVE DRIVER)	0	0
SFPQ	All	25	0.0501002	AMPLIFICATION	0	0	DEEP DELETION	0	0	mRNA HIGH	10	0.0200401	mRNA LOW	15	0.0300601	FUSION	0	0	MISSENSE, INFRAME, TRUNCATING MUTATIONS (PUTATIVE DRIVER)	0	0
SIAH2	All	23	0.0460922	AMPLIFICATION	0	0	DEEP DELETION	0	0	mRNA HIGH	9	0.0180361	mRNA LOW	14	0.0280561	FUSION	0	0	MISSENSE, INFRAME, TRUNCATING MUTATIONS (PUTATIVE DRIVER)	0	0
SIK1	All	28	0.0561122	AMPLIFICATION	0	0	DEEP DELETION	0	0	mRNA HIGH	18	0.0360721	mRNA LOW	10	0.0200401	FUSION	0	0	MISSENSE, INFRAME, TRUNCATING MUTATIONS (PUTATIVE DRIVER)	0	0
SIN3A	All	23	0.0460922	AMPLIFICATION	0	0	DEEP DELETION	0	0	mRNA HIGH	7	0.0140281	mRNA LOW	16	0.0320641	FUSION	0	0	MISSENSE, INFRAME, TRUNCATING MUTATIONS (PUTATIVE DRIVER)	0	0
SIRT1	All	24	0.0480962	AMPLIFICATION	0	0	DEEP DELETION	3	0.00601202	mRNA HIGH	2	0.00400802	mRNA LOW	19	0.0380762	FUSION	0	0	MISSENSE, INFRAME, TRUNCATING MUTATIONS (PUTATIVE DRIVER)	0	0
SIX3	All	8	0.0160321	AMPLIFICATION	0	0	DEEP DELETION	0	0	mRNA HIGH	8	0.0160321	mRNA LOW	0	0	FUSION	0	0	MISSENSE, INFRAME, TRUNCATING MUTATIONS (PUTATIVE DRIVER)	0	0
SLC6A4	All	25	0.0501002	AMPLIFICATION	1	0.00200401	DEEP DELETION	0	0	mRNA HIGH	24	0.0480962	mRNA LOW	0	0	FUSION	0	0	MISSENSE, INFRAME, TRUNCATING MUTATIONS (PUTATIVE DRIVER)	0	0
SOX14	All	1	0.00200401	AMPLIFICATION	0	0	DEEP DELETION	0	0	mRNA HIGH	1	0.00200401	mRNA LOW	0	0	FUSION	0	0	MISSENSE, INFRAME, TRUNCATING MUTATIONS (PUTATIVE DRIVER)	0	0
SPSB4	All	22	0.0440882	AMPLIFICATION	0	0	DEEP DELETION	0	0	mRNA HIGH	22	0.0440882	mRNA LOW	0	0	FUSION	0	0	MISSENSE, INFRAME, TRUNCATING MUTATIONS (PUTATIVE DRIVER)	0	0
SRRD	All	36	0.0721443	AMPLIFICATION	0	0	DEEP DELETION	0	0	mRNA HIGH	14	0.0280561	mRNA LOW	22	0.0440882	FUSION	0	0	MISSENSE, INFRAME, TRUNCATING MUTATIONS (PUTATIVE DRIVER)	0	0
SUV39H1	All	24	0.0480962	AMPLIFICATION	1	0.00200401	DEEP DELETION	0	0	mRNA HIGH	18	0.0360721	mRNA LOW	5	0.01002	FUSION	0	0	MISSENSE, INFRAME, TRUNCATING MUTATIONS (PUTATIVE DRIVER)	0	0
SUV39H2	All	32	0.0641283	AMPLIFICATION	0	0	DEEP DELETION	0	0	mRNA HIGH	11	0.0220441	mRNA LOW	21	0.0420842	FUSION	0	0	MISSENSE, INFRAME, TRUNCATING MUTATIONS (PUTATIVE DRIVER)	0	0
TARDBP	All	19	0.0380762	AMPLIFICATION	0	0	DEEP DELETION	0	0	mRNA HIGH	14	0.0280561	mRNA LOW	5	0.01002	FUSION	0	0	MISSENSE, INFRAME, TRUNCATING MUTATIONS (PUTATIVE DRIVER)	0	0
THRAP3	All	21	0.0420842	AMPLIFICATION	0	0	DEEP DELETION	0	0	mRNA HIGH	2	0.00400802	mRNA LOW	19	0.0380762	FUSION	0	0	MISSENSE, INFRAME, TRUNCATING MUTATIONS (PUTATIVE DRIVER)	0	0
TIMELESS	All	27	0.0541082	AMPLIFICATION	0	0	DEEP DELETION	0	0	mRNA HIGH	9	0.0180361	mRNA LOW	18	0.0360721	FUSION	0	0	MISSENSE, INFRAME, TRUNCATING MUTATIONS (PUTATIVE DRIVER)	0	0
TNFRSF11A	All	23	0.0460922	AMPLIFICATION	0	0	DEEP DELETION	0	0	mRNA HIGH	4	0.00801603	mRNA LOW	19	0.0380762	FUSION	0	0	MISSENSE, INFRAME, TRUNCATING MUTATIONS (PUTATIVE DRIVER)	0	0
TOP1	All	29	0.0581162	AMPLIFICATION	0	0	DEEP DELETION	0	0	mRNA HIGH	6	0.012024	mRNA LOW	23	0.0460922	FUSION	0	0	MISSENSE, INFRAME, TRUNCATING MUTATIONS (PUTATIVE DRIVER)	0	0
TOP2A	All	25	0.0501002	AMPLIFICATION	1	0.00200401	DEEP DELETION	0	0	mRNA HIGH	8	0.0160321	mRNA LOW	16	0.0320641	FUSION	0	0	MISSENSE, INFRAME, TRUNCATING MUTATIONS (PUTATIVE DRIVER)	0	0
TP53	All	30	0.0601202	AMPLIFICATION	0	0	DEEP DELETION	2	0.00400802	mRNA HIGH	13	0.0260521	mRNA LOW	13	0.0260521	FUSION	0	0	MISSENSE, INFRAME, TRUNCATING MUTATIONS (PUTATIVE DRIVER)	2	0.00400802
UBE3A	All	22	0.0440882	AMPLIFICATION	0	0	DEEP DELETION	0	0	mRNA HIGH	6	0.012024	mRNA LOW	16	0.0320641	FUSION	0	0	MISSENSE, INFRAME, TRUNCATING MUTATIONS (PUTATIVE DRIVER)	0	0
USP2	All	23	0.0460922	AMPLIFICATION	0	0	DEEP DELETION	0	0	mRNA HIGH	12	0.0240481	mRNA LOW	11	0.0220441	FUSION	0	0	MISSENSE, INFRAME, TRUNCATING MUTATIONS (PUTATIVE DRIVER)	0	0
USP7	All	22	0.0440882	AMPLIFICATION	0	0	DEEP DELETION	0	0	mRNA HIGH	13	0.0260521	mRNA LOW	9	0.0180361	FUSION	0	0	MISSENSE, INFRAME, TRUNCATING MUTATIONS (PUTATIVE DRIVER)	0	0
USP9X	All	21	0.0420842	AMPLIFICATION	1	0.00200401	DEEP DELETION	0	0	mRNA HIGH	5	0.01002	mRNA LOW	15	0.0300601	FUSION	0	0	MISSENSE, INFRAME, TRUNCATING MUTATIONS (PUTATIVE DRIVER)	0	0
UTS2	All	16	0.0320641	AMPLIFICATION	0	0	DEEP DELETION	0	0	mRNA HIGH	16	0.0320641	mRNA LOW	0	0	FUSION	0	0	MISSENSE, INFRAME, TRUNCATING MUTATIONS (PUTATIVE DRIVER)	0	0
UTS2R	All	18	0.0360721	AMPLIFICATION	1	0.00200401	DEEP DELETION	0	0	mRNA HIGH	17	0.0340681	mRNA LOW	0	0	FUSION	0	0	MISSENSE, INFRAME, TRUNCATING MUTATIONS (PUTATIVE DRIVER)	0	0
ZFHX3	All	24	0.0480962	AMPLIFICATION	0	0	DEEP DELETION	1	0.00200401	mRNA HIGH	8	0.0160321	mRNA LOW	12	0.0240481	FUSION	0	0	MISSENSE, INFRAME, TRUNCATING MUTATIONS (PUTATIVE DRIVER)	3	0.00601202
ZPBP2	All	11	0.0220441	AMPLIFICATION	1	0.00200401	DEEP DELETION	0	0	mRNA HIGH	10	0.0200401	mRNA LOW	0	0	FUSION	0	0	MISSENSE, INFRAME, TRUNCATING MUTATIONS (PUTATIVE DRIVER)	0	0

## Sheet: ST_8
Supplementary Table 8. Frequency of alterations belonging to 123 individuals with TCGA-THYM
GENE	TYPE	TOTAL	f	TYPE	TOTAL	f	TYPE	TOTAL	f	TYPE	TOTAL	f	TYPE	TOTAL	f	TYPE	TOTAL	f	TYPE	TOTAL	f
AANAT	All	7	0.0569106	AMPLIFICATION	1	0.00813008	DEEP DELETION	0	0	mRNA HIGH	6	0.0487805	mRNA LOW	0	0	FUSION	0	0	MISSENSE, INFRAME, TRUNCATING MUTATIONS (PUTATIVE DRIVER)	0	0
ADA	All	8	0.0650407	AMPLIFICATION	0	0	DEEP DELETION	0	0	mRNA HIGH	0	0	mRNA LOW	8	0.0650407	FUSION	0	0	MISSENSE, INFRAME, TRUNCATING MUTATIONS (PUTATIVE DRIVER)	0	0
ADCY1	All	5	0.0406504	AMPLIFICATION	0	0	DEEP DELETION	0	0	mRNA HIGH	3	0.0243902	mRNA LOW	2	0.0162602	FUSION	0	0	MISSENSE, INFRAME, TRUNCATING MUTATIONS (PUTATIVE DRIVER)	0	0
ADORA1	All	9	0.0731707	AMPLIFICATION	2	0.0162602	DEEP DELETION	0	0	mRNA HIGH	7	0.0569106	mRNA LOW	0	0	FUSION	0	0	MISSENSE, INFRAME, TRUNCATING MUTATIONS (PUTATIVE DRIVER)	0	0
ADORA2A	All	8	0.0650407	AMPLIFICATION	1	0.00813008	DEEP DELETION	1	0.00813008	mRNA HIGH	0	0	mRNA LOW	6	0.0487805	FUSION	0	0	MISSENSE, INFRAME, TRUNCATING MUTATIONS (PUTATIVE DRIVER)	0	0
ADRB1	All	6	0.0487805	AMPLIFICATION	0	0	DEEP DELETION	0	0	mRNA HIGH	3	0.0243902	mRNA LOW	3	0.0243902	FUSION	0	0	MISSENSE, INFRAME, TRUNCATING MUTATIONS (PUTATIVE DRIVER)	0	0
AHCY	All	7	0.0569106	AMPLIFICATION	0	0	DEEP DELETION	0	0	mRNA HIGH	6	0.0487805	mRNA LOW	1	0.00813008	FUSION	0	0	MISSENSE, INFRAME, TRUNCATING MUTATIONS (PUTATIVE DRIVER)	0	0
AHR	All	4	0.0325203	AMPLIFICATION	0	0	DEEP DELETION	0	0	mRNA HIGH	2	0.0162602	mRNA LOW	2	0.0162602	FUSION	0	0	MISSENSE, INFRAME, TRUNCATING MUTATIONS (PUTATIVE DRIVER)	0	0
ALB	All	6	0.0487805	AMPLIFICATION	0	0	DEEP DELETION	0	0	mRNA HIGH	4	0.0325203	mRNA LOW	2	0.0162602	FUSION	0	0	MISSENSE, INFRAME, TRUNCATING MUTATIONS (PUTATIVE DRIVER)	0	0
ANKFN1	All	5	0.0406504	AMPLIFICATION	1	0.00813008	DEEP DELETION	0	0	mRNA HIGH	4	0.0325203	mRNA LOW	0	0	FUSION	0	0	MISSENSE, INFRAME, TRUNCATING MUTATIONS (PUTATIVE DRIVER)	0	0
ARNTL	All	4	0.0325203	AMPLIFICATION	0	0	DEEP DELETION	0	0	mRNA HIGH	0	0	mRNA LOW	4	0.0325203	FUSION	0	0	MISSENSE, INFRAME, TRUNCATING MUTATIONS (PUTATIVE DRIVER)	0	0
ARNTL2	All	8	0.0650407	AMPLIFICATION	0	0	DEEP DELETION	0	0	mRNA HIGH	6	0.0487805	mRNA LOW	2	0.0162602	FUSION	0	0	MISSENSE, INFRAME, TRUNCATING MUTATIONS (PUTATIVE DRIVER)	0	0
ASS1	All	7	0.0569106	AMPLIFICATION	0	0	DEEP DELETION	1	0.00813008	mRNA HIGH	3	0.0243902	mRNA LOW	3	0.0243902	FUSION	0	0	MISSENSE, INFRAME, TRUNCATING MUTATIONS (PUTATIVE DRIVER)	0	0
ATF4	All	6	0.0487805	AMPLIFICATION	0	0	DEEP DELETION	1	0.00813008	mRNA HIGH	1	0.00813008	mRNA LOW	4	0.0325203	FUSION	0	0	MISSENSE, INFRAME, TRUNCATING MUTATIONS (PUTATIVE DRIVER)	0	0
ATG7	All	6	0.0487805	AMPLIFICATION	0	0	DEEP DELETION	1	0.00813008	mRNA HIGH	4	0.0325203	mRNA LOW	1	0.00813008	FUSION	0	0	MISSENSE, INFRAME, TRUNCATING MUTATIONS (PUTATIVE DRIVER)	0	0
ATOH7	All	4	0.0325203	AMPLIFICATION	0	0	DEEP DELETION	0	0	mRNA HIGH	4	0.0325203	mRNA LOW	0	0	FUSION	0	0	MISSENSE, INFRAME, TRUNCATING MUTATIONS (PUTATIVE DRIVER)	0	0
BHLHE40	All	5	0.0406504	AMPLIFICATION	0	0	DEEP DELETION	1	0.00813008	mRNA HIGH	3	0.0243902	mRNA LOW	1	0.00813008	FUSION	0	0	MISSENSE, INFRAME, TRUNCATING MUTATIONS (PUTATIVE DRIVER)	0	0
BHLHE41	All	4	0.0325203	AMPLIFICATION	0	0	DEEP DELETION	0	0	mRNA HIGH	0	0	mRNA LOW	4	0.0325203	FUSION	0	0	MISSENSE, INFRAME, TRUNCATING MUTATIONS (PUTATIVE DRIVER)	0	0
BTBD9	All	6	0.0487805	AMPLIFICATION	1	0.00813008	DEEP DELETION	0	0	mRNA HIGH	4	0.0325203	mRNA LOW	1	0.00813008	FUSION	0	0	MISSENSE, INFRAME, TRUNCATING MUTATIONS (PUTATIVE DRIVER)	0	0
BTRC	All	4	0.0325203	AMPLIFICATION	0	0	DEEP DELETION	0	0	mRNA HIGH	1	0.00813008	mRNA LOW	3	0.0243902	FUSION	0	0	MISSENSE, INFRAME, TRUNCATING MUTATIONS (PUTATIVE DRIVER)	0	0
CARTPT	All	1	0.00813008	AMPLIFICATION	0	0	DEEP DELETION	0	0	mRNA HIGH	1	0.00813008	mRNA LOW	0	0	FUSION	0	0	MISSENSE, INFRAME, TRUNCATING MUTATIONS (PUTATIVE DRIVER)	0	0
CASP1	All	7	0.0569106	AMPLIFICATION	0	0	DEEP DELETION	0	0	mRNA HIGH	6	0.0487805	mRNA LOW	1	0.00813008	FUSION	0	0	MISSENSE, INFRAME, TRUNCATING MUTATIONS (PUTATIVE DRIVER)	0	0
CAVIN3	All	7	0.0569106	AMPLIFICATION	0	0	DEEP DELETION	0	0	mRNA HIGH	2	0.0162602	mRNA LOW	5	0.0406504	FUSION	0	0	MISSENSE, INFRAME, TRUNCATING MUTATIONS (PUTATIVE DRIVER)	0	0
CCAR2	All	6	0.0487805	AMPLIFICATION	1	0.00813008	DEEP DELETION	0	0	mRNA HIGH	1	0.00813008	mRNA LOW	4	0.0325203	FUSION	0	0	MISSENSE, INFRAME, TRUNCATING MUTATIONS (PUTATIVE DRIVER)	0	0
CDK1	All	9	0.0731707	AMPLIFICATION	0	0	DEEP DELETION	0	0	mRNA HIGH	0	0	mRNA LOW	9	0.0731707	FUSION	0	0	MISSENSE, INFRAME, TRUNCATING MUTATIONS (PUTATIVE DRIVER)	0	0
CHRNB2	All	6	0.0487805	AMPLIFICATION	2	0.0162602	DEEP DELETION	0	0	mRNA HIGH	4	0.0325203	mRNA LOW	0	0	FUSION	0	0	MISSENSE, INFRAME, TRUNCATING MUTATIONS (PUTATIVE DRIVER)	0	0
CIART	All	5	0.0406504	AMPLIFICATION	1	0.00813008	DEEP DELETION	0	0	mRNA HIGH	3	0.0243902	mRNA LOW	1	0.00813008	FUSION	0	0	MISSENSE, INFRAME, TRUNCATING MUTATIONS (PUTATIVE DRIVER)	0	0
CIPC	All	6	0.0487805	AMPLIFICATION	0	0	DEEP DELETION	0	0	mRNA HIGH	2	0.0162602	mRNA LOW	4	0.0325203	FUSION	0	0	MISSENSE, INFRAME, TRUNCATING MUTATIONS (PUTATIVE DRIVER)	0	0
CLOCK	All	1	0.00813008	AMPLIFICATION	0	0	DEEP DELETION	0	0	mRNA HIGH	1	0.00813008	mRNA LOW	0	0	FUSION	0	0	MISSENSE, INFRAME, TRUNCATING MUTATIONS (PUTATIVE DRIVER)	0	0
CORT	All	5	0.0406504	AMPLIFICATION	0	0	DEEP DELETION	0	0	mRNA HIGH	4	0.0325203	mRNA LOW	1	0.00813008	FUSION	0	0	MISSENSE, INFRAME, TRUNCATING MUTATIONS (PUTATIVE DRIVER)	0	0
CREB1	All	5	0.0406504	AMPLIFICATION	0	0	DEEP DELETION	0	0	mRNA HIGH	1	0.00813008	mRNA LOW	4	0.0325203	FUSION	0	0	MISSENSE, INFRAME, TRUNCATING MUTATIONS (PUTATIVE DRIVER)	0	0
CREM	All	5	0.0406504	AMPLIFICATION	0	0	DEEP DELETION	1	0.00813008	mRNA HIGH	2	0.0162602	mRNA LOW	2	0.0162602	FUSION	0	0	MISSENSE, INFRAME, TRUNCATING MUTATIONS (PUTATIVE DRIVER)	0	0
CRTC1	All	5	0.0406504	AMPLIFICATION	1	0.00813008	DEEP DELETION	0	0	mRNA HIGH	2	0.0162602	mRNA LOW	2	0.0162602	FUSION	0	0	MISSENSE, INFRAME, TRUNCATING MUTATIONS (PUTATIVE DRIVER)	0	0
CRY1	All	4	0.0325203	AMPLIFICATION	0	0	DEEP DELETION	0	0	mRNA HIGH	0	0	mRNA LOW	4	0.0325203	FUSION	0	0	MISSENSE, INFRAME, TRUNCATING MUTATIONS (PUTATIVE DRIVER)	0	0
CRY2	All	6	0.0487805	AMPLIFICATION	0	0	DEEP DELETION	0	0	mRNA HIGH	3	0.0243902	mRNA LOW	3	0.0243902	FUSION	0	0	MISSENSE, INFRAME, TRUNCATING MUTATIONS (PUTATIVE DRIVER)	0	0
CSF2	All	5	0.0406504	AMPLIFICATION	0	0	DEEP DELETION	0	0	mRNA HIGH	5	0.0406504	mRNA LOW	0	0	FUSION	0	0	MISSENSE, INFRAME, TRUNCATING MUTATIONS (PUTATIVE DRIVER)	0	0
CSNK1D	All	6	0.0487805	AMPLIFICATION	1	0.00813008	DEEP DELETION	1	0.00813008	mRNA HIGH	2	0.0162602	mRNA LOW	2	0.0162602	FUSION	0	0	MISSENSE, INFRAME, TRUNCATING MUTATIONS (PUTATIVE DRIVER)	0	0
CSNK1E	All	8	0.0650407	AMPLIFICATION	0	0	DEEP DELETION	2	0.0162602	mRNA HIGH	4	0.0325203	mRNA LOW	2	0.0162602	FUSION	0	0	MISSENSE, INFRAME, TRUNCATING MUTATIONS (PUTATIVE DRIVER)	0	0
CYP7B1	All	5	0.0406504	AMPLIFICATION	0	0	DEEP DELETION	0	0	mRNA HIGH	4	0.0325203	mRNA LOW	1	0.00813008	FUSION	0	0	MISSENSE, INFRAME, TRUNCATING MUTATIONS (PUTATIVE DRIVER)	0	0
DBP	All	7	0.0569106	AMPLIFICATION	0	0	DEEP DELETION	1	0.00813008	mRNA HIGH	2	0.0162602	mRNA LOW	4	0.0325203	FUSION	0	0	MISSENSE, INFRAME, TRUNCATING MUTATIONS (PUTATIVE DRIVER)	0	0
DDB1	All	8	0.0650407	AMPLIFICATION	0	0	DEEP DELETION	0	0	mRNA HIGH	5	0.0406504	mRNA LOW	3	0.0243902	FUSION	0	0	MISSENSE, INFRAME, TRUNCATING MUTATIONS (PUTATIVE DRIVER)	0	0
DDX5	All	7	0.0569106	AMPLIFICATION	2	0.0162602	DEEP DELETION	0	0	mRNA HIGH	0	0	mRNA LOW	5	0.0406504	FUSION	0	0	MISSENSE, INFRAME, TRUNCATING MUTATIONS (PUTATIVE DRIVER)	0	0
DHX9	All	8	0.0650407	AMPLIFICATION	2	0.0162602	DEEP DELETION	0	0	mRNA HIGH	0	0	mRNA LOW	6	0.0487805	FUSION	0	0	MISSENSE, INFRAME, TRUNCATING MUTATIONS (PUTATIVE DRIVER)	0	0
DPYD	All	4	0.0325203	AMPLIFICATION	0	0	DEEP DELETION	0	0	mRNA HIGH	0	0	mRNA LOW	4	0.0325203	FUSION	0	0	MISSENSE, INFRAME, TRUNCATING MUTATIONS (PUTATIVE DRIVER)	0	0
DRD1	All	5	0.0406504	AMPLIFICATION	0	0	DEEP DELETION	0	0	mRNA HIGH	5	0.0406504	mRNA LOW	0	0	FUSION	0	0	MISSENSE, INFRAME, TRUNCATING MUTATIONS (PUTATIVE DRIVER)	0	0
DRD2	All	3	0.0243902	AMPLIFICATION	0	0	DEEP DELETION	0	0	mRNA HIGH	3	0.0243902	mRNA LOW	0	0	FUSION	0	0	MISSENSE, INFRAME, TRUNCATING MUTATIONS (PUTATIVE DRIVER)	0	0
DRD3	All	113	0.918699	AMPLIFICATION	1	0.00813008	DEEP DELETION	0	0	mRNA HIGH	0	0	mRNA LOW	112	0.910569	FUSION	0	0	MISSENSE, INFRAME, TRUNCATING MUTATIONS (PUTATIVE DRIVER)	0	0
DRD4	All	5	0.0406504	AMPLIFICATION	0	0	DEEP DELETION	0	0	mRNA HIGH	3	0.0243902	mRNA LOW	2	0.0162602	FUSION	0	0	MISSENSE, INFRAME, TRUNCATING MUTATIONS (PUTATIVE DRIVER)	0	0
DYRK1A	All	7	0.0569106	AMPLIFICATION	1	0.00813008	DEEP DELETION	0	0	mRNA HIGH	1	0.00813008	mRNA LOW	5	0.0406504	FUSION	0	0	MISSENSE, INFRAME, TRUNCATING MUTATIONS (PUTATIVE DRIVER)	0	0
EGR1	All	4	0.0325203	AMPLIFICATION	0	0	DEEP DELETION	0	0	mRNA HIGH	4	0.0325203	mRNA LOW	0	0	FUSION	0	0	MISSENSE, INFRAME, TRUNCATING MUTATIONS (PUTATIVE DRIVER)	0	0
EP300	All	3	0.0243902	AMPLIFICATION	0	0	DEEP DELETION	0	0	mRNA HIGH	0	0	mRNA LOW	3	0.0243902	FUSION	0	0	MISSENSE, INFRAME, TRUNCATING MUTATIONS (PUTATIVE DRIVER)	0	0
EZH2	All	7	0.0569106	AMPLIFICATION	0	0	DEEP DELETION	0	0	mRNA HIGH	0	0	mRNA LOW	7	0.0569106	FUSION	0	0	MISSENSE, INFRAME, TRUNCATING MUTATIONS (PUTATIVE DRIVER)	0	0
FBXL3	All	7	0.0569106	AMPLIFICATION	0	0	DEEP DELETION	1	0.00813008	mRNA HIGH	1	0.00813008	mRNA LOW	5	0.0406504	FUSION	0	0	MISSENSE, INFRAME, TRUNCATING MUTATIONS (PUTATIVE DRIVER)	0	0
FBXL6	All	5	0.0406504	AMPLIFICATION	0	0	DEEP DELETION	0	0	mRNA HIGH	4	0.0325203	mRNA LOW	1	0.00813008	FUSION	0	0	MISSENSE, INFRAME, TRUNCATING MUTATIONS (PUTATIVE DRIVER)	0	0
FBXL8	All	5	0.0406504	AMPLIFICATION	0	0	DEEP DELETION	0	0	mRNA HIGH	4	0.0325203	mRNA LOW	1	0.00813008	FUSION	0	0	MISSENSE, INFRAME, TRUNCATING MUTATIONS (PUTATIVE DRIVER)	0	0
FBXL12	All	1	0.00813008	AMPLIFICATION	0	0	DEEP DELETION	0	0	mRNA HIGH	0	0	mRNA LOW	1	0.00813008	FUSION	0	0	MISSENSE, INFRAME, TRUNCATING MUTATIONS (PUTATIVE DRIVER)	0	0
FBXL17	All	6	0.0487805	AMPLIFICATION	0	0	DEEP DELETION	0	0	mRNA HIGH	5	0.0406504	mRNA LOW	1	0.00813008	FUSION	0	0	MISSENSE, INFRAME, TRUNCATING MUTATIONS (PUTATIVE DRIVER)	0	0
FBXL21P	All	1	0.00813008	AMPLIFICATION	0	0	DEEP DELETION	0	0	mRNA HIGH	1	0.00813008	mRNA LOW	0	0	FUSION	0	0	MISSENSE, INFRAME, TRUNCATING MUTATIONS (PUTATIVE DRIVER)	0	0
FBXL22	All	10	0.0813008	AMPLIFICATION	0	0	DEEP DELETION	0	0	mRNA HIGH	7	0.0569106	mRNA LOW	3	0.0243902	FUSION	0	0	MISSENSE, INFRAME, TRUNCATING MUTATIONS (PUTATIVE DRIVER)	0	0
FBXW7	All	7	0.0569106	AMPLIFICATION	0	0	DEEP DELETION	0	0	mRNA HIGH	5	0.0406504	mRNA LOW	2	0.0162602	FUSION	0	0	MISSENSE, INFRAME, TRUNCATING MUTATIONS (PUTATIVE DRIVER)	0	0
FBXW11	All	6	0.0487805	AMPLIFICATION	0	0	DEEP DELETION	0	0	mRNA HIGH	3	0.0243902	mRNA LOW	3	0.0243902	FUSION	0	0	MISSENSE, INFRAME, TRUNCATING MUTATIONS (PUTATIVE DRIVER)	0	0
GABRB3	All	1	0.00813008	AMPLIFICATION	0	0	DEEP DELETION	0	0	mRNA HIGH	1	0.00813008	mRNA LOW	0	0	FUSION	0	0	MISSENSE, INFRAME, TRUNCATING MUTATIONS (PUTATIVE DRIVER)	0	0
GFPT1	All	5	0.0406504	AMPLIFICATION	0	0	DEEP DELETION	0	0	mRNA HIGH	3	0.0243902	mRNA LOW	2	0.0162602	FUSION	0	0	MISSENSE, INFRAME, TRUNCATING MUTATIONS (PUTATIVE DRIVER)	0	0
GHRH	All	7	0.0569106	AMPLIFICATION	0	0	DEEP DELETION	0	0	mRNA HIGH	3	0.0243902	mRNA LOW	4	0.0325203	FUSION	0	0	MISSENSE, INFRAME, TRUNCATING MUTATIONS (PUTATIVE DRIVER)	0	0
GHRHR	All	1	0.00813008	AMPLIFICATION	0	0	DEEP DELETION	0	0	mRNA HIGH	1	0.00813008	mRNA LOW	0	0	FUSION	0	0	MISSENSE, INFRAME, TRUNCATING MUTATIONS (PUTATIVE DRIVER)	0	0
GHRL	All	7	0.0569106	AMPLIFICATION	0	0	DEEP DELETION	1	0.00813008	mRNA HIGH	4	0.0325203	mRNA LOW	2	0.0162602	FUSION	0	0	MISSENSE, INFRAME, TRUNCATING MUTATIONS (PUTATIVE DRIVER)	0	0
GPR157	All	4	0.0325203	AMPLIFICATION	0	0	DEEP DELETION	0	0	mRNA HIGH	3	0.0243902	mRNA LOW	1	0.00813008	FUSION	0	0	MISSENSE, INFRAME, TRUNCATING MUTATIONS (PUTATIVE DRIVER)	0	0
GPR176	All	4	0.0325203	AMPLIFICATION	0	0	DEEP DELETION	0	0	mRNA HIGH	1	0.00813008	mRNA LOW	3	0.0243902	FUSION	0	0	MISSENSE, INFRAME, TRUNCATING MUTATIONS (PUTATIVE DRIVER)	0	0
GSK3B	All	9	0.0731707	AMPLIFICATION	1	0.00813008	DEEP DELETION	0	0	mRNA HIGH	2	0.0162602	mRNA LOW	6	0.0487805	FUSION	0	0	MISSENSE, INFRAME, TRUNCATING MUTATIONS (PUTATIVE DRIVER)	0	0
HCRTR2	All	5	0.0406504	AMPLIFICATION	0	0	DEEP DELETION	0	0	mRNA HIGH	5	0.0406504	mRNA LOW	0	0	FUSION	0	0	MISSENSE, INFRAME, TRUNCATING MUTATIONS (PUTATIVE DRIVER)	0	0
HDAC1	All	3	0.0243902	AMPLIFICATION	0	0	DEEP DELETION	0	0	mRNA HIGH	0	0	mRNA LOW	3	0.0243902	FUSION	0	0	MISSENSE, INFRAME, TRUNCATING MUTATIONS (PUTATIVE DRIVER)	0	0
HDAC2	All	3	0.0243902	AMPLIFICATION	0	0	DEEP DELETION	0	0	mRNA HIGH	0	0	mRNA LOW	3	0.0243902	FUSION	0	0	MISSENSE, INFRAME, TRUNCATING MUTATIONS (PUTATIVE DRIVER)	0	0
HDAC3	All	4	0.0325203	AMPLIFICATION	0	0	DEEP DELETION	0	0	mRNA HIGH	2	0.0162602	mRNA LOW	2	0.0162602	FUSION	0	0	MISSENSE, INFRAME, TRUNCATING MUTATIONS (PUTATIVE DRIVER)	0	0
HNF1B	All	5	0.0406504	AMPLIFICATION	1	0.00813008	DEEP DELETION	0	0	mRNA HIGH	4	0.0325203	mRNA LOW	0	0	FUSION	0	0	MISSENSE, INFRAME, TRUNCATING MUTATIONS (PUTATIVE DRIVER)	0	0
HNF4A	All	1	0.00813008	AMPLIFICATION	0	0	DEEP DELETION	0	0	mRNA HIGH	1	0.00813008	mRNA LOW	0	0	FUSION	0	0	MISSENSE, INFRAME, TRUNCATING MUTATIONS (PUTATIVE DRIVER)	0	0
HNRNPD	All	2	0.0162602	AMPLIFICATION	0	0	DEEP DELETION	0	0	mRNA HIGH	0	0	mRNA LOW	2	0.0162602	FUSION	0	0	MISSENSE, INFRAME, TRUNCATING MUTATIONS (PUTATIVE DRIVER)	0	0
HNRNPU	All	8	0.0650407	AMPLIFICATION	3	0.0243902	DEEP DELETION	0	0	mRNA HIGH	1	0.00813008	mRNA LOW	4	0.0325203	FUSION	0	0	MISSENSE, INFRAME, TRUNCATING MUTATIONS (PUTATIVE DRIVER)	0	0
HS3ST2	All	6	0.0487805	AMPLIFICATION	0	0	DEEP DELETION	0	0	mRNA HIGH	6	0.0487805	mRNA LOW	0	0	FUSION	0	0	MISSENSE, INFRAME, TRUNCATING MUTATIONS (PUTATIVE DRIVER)	0	0
HTR7	All	6	0.0487805	AMPLIFICATION	0	0	DEEP DELETION	0	0	mRNA HIGH	6	0.0487805	mRNA LOW	0	0	FUSION	0	0	MISSENSE, INFRAME, TRUNCATING MUTATIONS (PUTATIVE DRIVER)	0	0
HUWE1	All	3	0.0243902	AMPLIFICATION	0	0	DEEP DELETION	0	0	mRNA HIGH	2	0.0162602	mRNA LOW	1	0.00813008	FUSION	0	0	MISSENSE, INFRAME, TRUNCATING MUTATIONS (PUTATIVE DRIVER)	0	0
ID1	All	10	0.0813008	AMPLIFICATION	0	0	DEEP DELETION	0	0	mRNA HIGH	6	0.0487805	mRNA LOW	4	0.0325203	FUSION	0	0	MISSENSE, INFRAME, TRUNCATING MUTATIONS (PUTATIVE DRIVER)	0	0
ID2	All	6	0.0487805	AMPLIFICATION	0	0	DEEP DELETION	0	0	mRNA HIGH	4	0.0325203	mRNA LOW	2	0.0162602	FUSION	0	0	MISSENSE, INFRAME, TRUNCATING MUTATIONS (PUTATIVE DRIVER)	0	0
ID3	All	6	0.0487805	AMPLIFICATION	0	0	DEEP DELETION	1	0.00813008	mRNA HIGH	0	0	mRNA LOW	5	0.0406504	FUSION	0	0	MISSENSE, INFRAME, TRUNCATING MUTATIONS (PUTATIVE DRIVER)	0	0
ID4	All	6	0.0487805	AMPLIFICATION	0	0	DEEP DELETION	0	0	mRNA HIGH	4	0.0325203	mRNA LOW	2	0.0162602	FUSION	0	0	MISSENSE, INFRAME, TRUNCATING MUTATIONS (PUTATIVE DRIVER)	0	0
IL6	All	5	0.0406504	AMPLIFICATION	0	0	DEEP DELETION	0	0	mRNA HIGH	5	0.0406504	mRNA LOW	0	0	FUSION	0	0	MISSENSE, INFRAME, TRUNCATING MUTATIONS (PUTATIVE DRIVER)	0	0
IMPDH2	All	8	0.0650407	AMPLIFICATION	1	0.00813008	DEEP DELETION	1	0.00813008	mRNA HIGH	4	0.0325203	mRNA LOW	2	0.0162602	FUSION	0	0	MISSENSE, INFRAME, TRUNCATING MUTATIONS (PUTATIVE DRIVER)	0	0
KCNA2	All	10	0.0813008	AMPLIFICATION	0	0	DEEP DELETION	0	0	mRNA HIGH	4	0.0325203	mRNA LOW	6	0.0487805	FUSION	0	0	MISSENSE, INFRAME, TRUNCATING MUTATIONS (PUTATIVE DRIVER)	0	0
KCND2	All	5	0.0406504	AMPLIFICATION	0	0	DEEP DELETION	0	0	mRNA HIGH	5	0.0406504	mRNA LOW	0	0	FUSION	0	0	MISSENSE, INFRAME, TRUNCATING MUTATIONS (PUTATIVE DRIVER)	0	0
KCNMA1	All	6	0.0487805	AMPLIFICATION	0	0	DEEP DELETION	0	0	mRNA HIGH	5	0.0406504	mRNA LOW	1	0.00813008	FUSION	0	0	MISSENSE, INFRAME, TRUNCATING MUTATIONS (PUTATIVE DRIVER)	0	0
KDM2A	All	5	0.0406504	AMPLIFICATION	0	0	DEEP DELETION	0	0	mRNA HIGH	1	0.00813008	mRNA LOW	4	0.0325203	FUSION	0	0	MISSENSE, INFRAME, TRUNCATING MUTATIONS (PUTATIVE DRIVER)	0	0
KDM5A	All	7	0.0569106	AMPLIFICATION	1	0.00813008	DEEP DELETION	0	0	mRNA HIGH	3	0.0243902	mRNA LOW	3	0.0243902	FUSION	0	0	MISSENSE, INFRAME, TRUNCATING MUTATIONS (PUTATIVE DRIVER)	0	0
KDM5B	All	9	0.0731707	AMPLIFICATION	2	0.0162602	DEEP DELETION	0	0	mRNA HIGH	3	0.0243902	mRNA LOW	4	0.0325203	FUSION	0	0	MISSENSE, INFRAME, TRUNCATING MUTATIONS (PUTATIVE DRIVER)	0	0
KDM5C	All	4	0.0325203	AMPLIFICATION	0	0	DEEP DELETION	0	0	mRNA HIGH	2	0.0162602	mRNA LOW	2	0.0162602	FUSION	0	0	MISSENSE, INFRAME, TRUNCATING MUTATIONS (PUTATIVE DRIVER)	0	0
KDM8	All	5	0.0406504	AMPLIFICATION	0	0	DEEP DELETION	0	0	mRNA HIGH	1	0.00813008	mRNA LOW	4	0.0325203	FUSION	0	0	MISSENSE, INFRAME, TRUNCATING MUTATIONS (PUTATIVE DRIVER)	0	0
KLF10	All	2	0.0162602	AMPLIFICATION	0	0	DEEP DELETION	0	0	mRNA HIGH	1	0.00813008	mRNA LOW	1	0.00813008	FUSION	0	0	MISSENSE, INFRAME, TRUNCATING MUTATIONS (PUTATIVE DRIVER)	0	0
KMT2A	All	6	0.0487805	AMPLIFICATION	0	0	DEEP DELETION	1	0.00813008	mRNA HIGH	3	0.0243902	mRNA LOW	2	0.0162602	FUSION	0	0	MISSENSE, INFRAME, TRUNCATING MUTATIONS (PUTATIVE DRIVER)	0	0
LEPR	All	9	0.0731707	AMPLIFICATION	0	0	DEEP DELETION	1	0.00813008	mRNA HIGH	8	0.0650407	mRNA LOW	0	0	FUSION	0	0	MISSENSE, INFRAME, TRUNCATING MUTATIONS (PUTATIVE DRIVER)	0	0
LGR4	All	7	0.0569106	AMPLIFICATION	0	0	DEEP DELETION	0	0	mRNA HIGH	0	0	mRNA LOW	7	0.0569106	FUSION	0	0	MISSENSE, INFRAME, TRUNCATING MUTATIONS (PUTATIVE DRIVER)	0	0
MAGED1	All	10	0.0813008	AMPLIFICATION	0	0	DEEP DELETION	0	0	mRNA HIGH	1	0.00813008	mRNA LOW	9	0.0731707	FUSION	0	0	MISSENSE, INFRAME, TRUNCATING MUTATIONS (PUTATIVE DRIVER)	0	0
MAGEL2	All	0	0	AMPLIFICATION	0	0	DEEP DELETION	0	0	mRNA HIGH	0	0	mRNA LOW	0	0	FUSION	0	0	MISSENSE, INFRAME, TRUNCATING MUTATIONS (PUTATIVE DRIVER)	0	0
MAPK8	All	10	0.0813008	AMPLIFICATION	1	0.00813008	DEEP DELETION	0	0	mRNA HIGH	0	0	mRNA LOW	9	0.0731707	FUSION	0	0	MISSENSE, INFRAME, TRUNCATING MUTATIONS (PUTATIVE DRIVER)	0	0
MAPK9	All	5	0.0406504	AMPLIFICATION	0	0	DEEP DELETION	0	0	mRNA HIGH	0	0	mRNA LOW	5	0.0406504	FUSION	0	0	MISSENSE, INFRAME, TRUNCATING MUTATIONS (PUTATIVE DRIVER)	0	0
MAPK10	All	5	0.0406504	AMPLIFICATION	0	0	DEEP DELETION	0	0	mRNA HIGH	2	0.0162602	mRNA LOW	3	0.0243902	FUSION	0	0	MISSENSE, INFRAME, TRUNCATING MUTATIONS (PUTATIVE DRIVER)	0	0
MAT2A	All	7	0.0569106	AMPLIFICATION	0	0	DEEP DELETION	0	0	mRNA HIGH	2	0.0162602	mRNA LOW	5	0.0406504	FUSION	0	0	MISSENSE, INFRAME, TRUNCATING MUTATIONS (PUTATIVE DRIVER)	0	0
MC3R	All	1	0.00813008	AMPLIFICATION	0	0	DEEP DELETION	0	0	mRNA HIGH	1	0.00813008	mRNA LOW	0	0	FUSION	0	0	MISSENSE, INFRAME, TRUNCATING MUTATIONS (PUTATIVE DRIVER)	0	0
METTL3	All	6	0.0487805	AMPLIFICATION	0	0	DEEP DELETION	0	0	mRNA HIGH	1	0.00813008	mRNA LOW	5	0.0406504	FUSION	0	0	MISSENSE, INFRAME, TRUNCATING MUTATIONS (PUTATIVE DRIVER)	0	0
MTA1	All	6	0.0487805	AMPLIFICATION	0	0	DEEP DELETION	0	0	mRNA HIGH	3	0.0243902	mRNA LOW	3	0.0243902	FUSION	0	0	MISSENSE, INFRAME, TRUNCATING MUTATIONS (PUTATIVE DRIVER)	0	0
MTNR1A	All	2	0.0162602	AMPLIFICATION	0	0	DEEP DELETION	1	0.00813008	mRNA HIGH	1	0.00813008	mRNA LOW	0	0	FUSION	0	0	MISSENSE, INFRAME, TRUNCATING MUTATIONS (PUTATIVE DRIVER)	0	0
MTNR1B	All	1	0.00813008	AMPLIFICATION	0	0	DEEP DELETION	0	0	mRNA HIGH	1	0.00813008	mRNA LOW	0	0	FUSION	0	0	MISSENSE, INFRAME, TRUNCATING MUTATIONS (PUTATIVE DRIVER)	0	0
MTOR	All	5	0.0406504	AMPLIFICATION	0	0	DEEP DELETION	0	0	mRNA HIGH	4	0.0325203	mRNA LOW	1	0.00813008	FUSION	0	0	MISSENSE, INFRAME, TRUNCATING MUTATIONS (PUTATIVE DRIVER)	0	0
SLC25A19	All	6	0.0487805	AMPLIFICATION	1	0.00813008	DEEP DELETION	0	0	mRNA HIGH	4	0.0325203	mRNA LOW	1	0.00813008	FUSION	0	0	MISSENSE, INFRAME, TRUNCATING MUTATIONS (PUTATIVE DRIVER)	0	0
MYBBP1A	All	9	0.0731707	AMPLIFICATION	0	0	DEEP DELETION	1	0.00813008	mRNA HIGH	4	0.0325203	mRNA LOW	4	0.0325203	FUSION	0	0	MISSENSE, INFRAME, TRUNCATING MUTATIONS (PUTATIVE DRIVER)	0	0
MYCBP2	All	6	0.0487805	AMPLIFICATION	0	0	DEEP DELETION	1	0.00813008	mRNA HIGH	1	0.00813008	mRNA LOW	4	0.0325203	FUSION	0	0	MISSENSE, INFRAME, TRUNCATING MUTATIONS (PUTATIVE DRIVER)	0	0
NAGLU	All	5	0.0406504	AMPLIFICATION	1	0.00813008	DEEP DELETION	0	0	mRNA HIGH	2	0.0162602	mRNA LOW	2	0.0162602	FUSION	0	0	MISSENSE, INFRAME, TRUNCATING MUTATIONS (PUTATIVE DRIVER)	0	0
NAMPT	All	4	0.0325203	AMPLIFICATION	0	0	DEEP DELETION	0	0	mRNA HIGH	1	0.00813008	mRNA LOW	3	0.0243902	FUSION	0	0	MISSENSE, INFRAME, TRUNCATING MUTATIONS (PUTATIVE DRIVER)	0	0
NCOA2	All	0	0	AMPLIFICATION	0	0	DEEP DELETION	0	0	mRNA HIGH	0	0	mRNA LOW	0	0	FUSION	0	0	MISSENSE, INFRAME, TRUNCATING MUTATIONS (PUTATIVE DRIVER)	0	0
NCOR1	All	5	0.0406504	AMPLIFICATION	0	0	DEEP DELETION	1	0.00813008	mRNA HIGH	0	0	mRNA LOW	4	0.0325203	FUSION	0	0	MISSENSE, INFRAME, TRUNCATING MUTATIONS (PUTATIVE DRIVER)	0	0
NDUFA9	All	5	0.0406504	AMPLIFICATION	1	0.00813008	DEEP DELETION	0	0	mRNA HIGH	2	0.0162602	mRNA LOW	2	0.0162602	FUSION	0	0	MISSENSE, INFRAME, TRUNCATING MUTATIONS (PUTATIVE DRIVER)	0	0
NFIL3	All	4	0.0325203	AMPLIFICATION	0	0	DEEP DELETION	0	0	mRNA HIGH	3	0.0243902	mRNA LOW	1	0.00813008	FUSION	0	0	MISSENSE, INFRAME, TRUNCATING MUTATIONS (PUTATIVE DRIVER)	0	0
NGFR	All	8	0.0650407	AMPLIFICATION	1	0.00813008	DEEP DELETION	0	0	mRNA HIGH	4	0.0325203	mRNA LOW	3	0.0243902	FUSION	0	0	MISSENSE, INFRAME, TRUNCATING MUTATIONS (PUTATIVE DRIVER)	0	0
NKX2-1	All	0	0	AMPLIFICATION	0	0	DEEP DELETION	0	0	mRNA HIGH	0	0	mRNA LOW	0	0	FUSION	0	0	MISSENSE, INFRAME, TRUNCATING MUTATIONS (PUTATIVE DRIVER)	0	0
NLGN1	All	6	0.0487805	AMPLIFICATION	1	0.00813008	DEEP DELETION	0	0	mRNA HIGH	0	0	mRNA LOW	5	0.0406504	FUSION	0	0	MISSENSE, INFRAME, TRUNCATING MUTATIONS (PUTATIVE DRIVER)	0	0
NMS	All	0	0	AMPLIFICATION	0	0	DEEP DELETION	0	0	mRNA HIGH	0	0	mRNA LOW	0	0	FUSION	0	0	MISSENSE, INFRAME, TRUNCATING MUTATIONS (PUTATIVE DRIVER)	0	0
NMU	All	12	0.097561	AMPLIFICATION	0	0	DEEP DELETION	0	0	mRNA HIGH	4	0.0325203	mRNA LOW	8	0.0650407	FUSION	0	0	MISSENSE, INFRAME, TRUNCATING MUTATIONS (PUTATIVE DRIVER)	0	0
NOCT	All	5	0.0406504	AMPLIFICATION	0	0	DEEP DELETION	0	0	mRNA HIGH	5	0.0406504	mRNA LOW	0	0	FUSION	0	0	MISSENSE, INFRAME, TRUNCATING MUTATIONS (PUTATIVE DRIVER)	0	0
NONO	All	3	0.0243902	AMPLIFICATION	0	0	DEEP DELETION	0	0	mRNA HIGH	0	0	mRNA LOW	3	0.0243902	FUSION	0	0	MISSENSE, INFRAME, TRUNCATING MUTATIONS (PUTATIVE DRIVER)	0	0
NPAS2	All	4	0.0325203	AMPLIFICATION	0	0	DEEP DELETION	0	0	mRNA HIGH	1	0.00813008	mRNA LOW	3	0.0243902	FUSION	0	0	MISSENSE, INFRAME, TRUNCATING MUTATIONS (PUTATIVE DRIVER)	0	0
NPS	All	0	0	AMPLIFICATION	0	0	DEEP DELETION	0	0	mRNA HIGH	0	0	mRNA LOW	0	0	FUSION	0	0	MISSENSE, INFRAME, TRUNCATING MUTATIONS (PUTATIVE DRIVER)	0	0
NPY2R	All	4	0.0325203	AMPLIFICATION	0	0	DEEP DELETION	1	0.00813008	mRNA HIGH	3	0.0243902	mRNA LOW	0	0	FUSION	0	0	MISSENSE, INFRAME, TRUNCATING MUTATIONS (PUTATIVE DRIVER)	0	0
NR0B2	All	4	0.0325203	AMPLIFICATION	0	0	DEEP DELETION	0	0	mRNA HIGH	4	0.0325203	mRNA LOW	0	0	FUSION	0	0	MISSENSE, INFRAME, TRUNCATING MUTATIONS (PUTATIVE DRIVER)	0	0
NR1D1	All	5	0.0406504	AMPLIFICATION	1	0.00813008	DEEP DELETION	0	0	mRNA HIGH	4	0.0325203	mRNA LOW	0	0	FUSION	0	0	MISSENSE, INFRAME, TRUNCATING MUTATIONS (PUTATIVE DRIVER)	0	0
NR1D2	All	6	0.0487805	AMPLIFICATION	0	0	DEEP DELETION	1	0.00813008	mRNA HIGH	3	0.0243902	mRNA LOW	2	0.0162602	FUSION	0	0	MISSENSE, INFRAME, TRUNCATING MUTATIONS (PUTATIVE DRIVER)	0	0
NR2F6	All	6	0.0487805	AMPLIFICATION	0	0	DEEP DELETION	0	0	mRNA HIGH	2	0.0162602	mRNA LOW	4	0.0325203	FUSION	0	0	MISSENSE, INFRAME, TRUNCATING MUTATIONS (PUTATIVE DRIVER)	0	0
NRIP1	All	7	0.0569106	AMPLIFICATION	1	0.00813008	DEEP DELETION	0	0	mRNA HIGH	2	0.0162602	mRNA LOW	4	0.0325203	FUSION	0	0	MISSENSE, INFRAME, TRUNCATING MUTATIONS (PUTATIVE DRIVER)	0	0
OGT	All	6	0.0487805	AMPLIFICATION	0	0	DEEP DELETION	0	0	mRNA HIGH	3	0.0243902	mRNA LOW	3	0.0243902	FUSION	0	0	MISSENSE, INFRAME, TRUNCATING MUTATIONS (PUTATIVE DRIVER)	0	0
OPN4	All	4	0.0325203	AMPLIFICATION	0	0	DEEP DELETION	0	0	mRNA HIGH	4	0.0325203	mRNA LOW	0	0	FUSION	0	0	MISSENSE, INFRAME, TRUNCATING MUTATIONS (PUTATIVE DRIVER)	0	0
OPN5	All	1	0.00813008	AMPLIFICATION	0	0	DEEP DELETION	0	0	mRNA HIGH	1	0.00813008	mRNA LOW	0	0	FUSION	0	0	MISSENSE, INFRAME, TRUNCATING MUTATIONS (PUTATIVE DRIVER)	0	0
OPRL1	All	5	0.0406504	AMPLIFICATION	0	0	DEEP DELETION	0	0	mRNA HIGH	3	0.0243902	mRNA LOW	2	0.0162602	FUSION	0	0	MISSENSE, INFRAME, TRUNCATING MUTATIONS (PUTATIVE DRIVER)	0	0
PDE6B	All	5	0.0406504	AMPLIFICATION	1	0.00813008	DEEP DELETION	0	0	mRNA HIGH	2	0.0162602	mRNA LOW	2	0.0162602	FUSION	0	0	MISSENSE, INFRAME, TRUNCATING MUTATIONS (PUTATIVE DRIVER)	0	0
PER1	All	6	0.0487805	AMPLIFICATION	0	0	DEEP DELETION	1	0.00813008	mRNA HIGH	3	0.0243902	mRNA LOW	2	0.0162602	FUSION	0	0	MISSENSE, INFRAME, TRUNCATING MUTATIONS (PUTATIVE DRIVER)	0	0
PER2	All	6	0.0487805	AMPLIFICATION	0	0	DEEP DELETION	1	0.00813008	mRNA HIGH	1	0.00813008	mRNA LOW	4	0.0325203	FUSION	0	0	MISSENSE, INFRAME, TRUNCATING MUTATIONS (PUTATIVE DRIVER)	0	0
PER3	All	3	0.0243902	AMPLIFICATION	0	0	DEEP DELETION	0	0	mRNA HIGH	0	0	mRNA LOW	3	0.0243902	FUSION	0	0	MISSENSE, INFRAME, TRUNCATING MUTATIONS (PUTATIVE DRIVER)	0	0
PHLPP1	All	7	0.0569106	AMPLIFICATION	0	0	DEEP DELETION	0	0	mRNA HIGH	5	0.0406504	mRNA LOW	2	0.0162602	FUSION	0	0	MISSENSE, INFRAME, TRUNCATING MUTATIONS (PUTATIVE DRIVER)	0	0
PIWIL2	All	5	0.0406504	AMPLIFICATION	1	0.00813008	DEEP DELETION	0	0	mRNA HIGH	4	0.0325203	mRNA LOW	0	0	FUSION	0	0	MISSENSE, INFRAME, TRUNCATING MUTATIONS (PUTATIVE DRIVER)	0	0
PMCH	All	3	0.0243902	AMPLIFICATION	0	0	DEEP DELETION	0	0	mRNA HIGH	3	0.0243902	mRNA LOW	0	0	FUSION	0	0	MISSENSE, INFRAME, TRUNCATING MUTATIONS (PUTATIVE DRIVER)	0	0
PML	All	4	0.0325203	AMPLIFICATION	0	0	DEEP DELETION	0	0	mRNA HIGH	4	0.0325203	mRNA LOW	0	0	FUSION	0	0	MISSENSE, INFRAME, TRUNCATING MUTATIONS (PUTATIVE DRIVER)	0	0
PPARA	All	5	0.0406504	AMPLIFICATION	0	0	DEEP DELETION	1	0.00813008	mRNA HIGH	2	0.0162602	mRNA LOW	2	0.0162602	FUSION	0	0	MISSENSE, INFRAME, TRUNCATING MUTATIONS (PUTATIVE DRIVER)	0	0
PPARG	All	7	0.0569106	AMPLIFICATION	0	0	DEEP DELETION	1	0.00813008	mRNA HIGH	5	0.0406504	mRNA LOW	1	0.00813008	FUSION	0	0	MISSENSE, INFRAME, TRUNCATING MUTATIONS (PUTATIVE DRIVER)	0	0
PPARGC1A	All	6	0.0487805	AMPLIFICATION	0	0	DEEP DELETION	0	0	mRNA HIGH	1	0.00813008	mRNA LOW	5	0.0406504	FUSION	0	0	MISSENSE, INFRAME, TRUNCATING MUTATIONS (PUTATIVE DRIVER)	0	0
PPP1CA	All	5	0.0406504	AMPLIFICATION	0	0	DEEP DELETION	0	0	mRNA HIGH	3	0.0243902	mRNA LOW	2	0.0162602	FUSION	0	0	MISSENSE, INFRAME, TRUNCATING MUTATIONS (PUTATIVE DRIVER)	0	0
PPP1CB	All	6	0.0487805	AMPLIFICATION	0	0	DEEP DELETION	0	0	mRNA HIGH	3	0.0243902	mRNA LOW	3	0.0243902	FUSION	0	0	MISSENSE, INFRAME, TRUNCATING MUTATIONS (PUTATIVE DRIVER)	0	0
PPP1CC	All	6	0.0487805	AMPLIFICATION	0	0	DEEP DELETION	0	0	mRNA HIGH	1	0.00813008	mRNA LOW	5	0.0406504	FUSION	0	0	MISSENSE, INFRAME, TRUNCATING MUTATIONS (PUTATIVE DRIVER)	0	0
PRF1	All	5	0.0406504	AMPLIFICATION	0	0	DEEP DELETION	0	0	mRNA HIGH	2	0.0162602	mRNA LOW	3	0.0243902	FUSION	0	0	MISSENSE, INFRAME, TRUNCATING MUTATIONS (PUTATIVE DRIVER)	0	0
PRKAA1	All	4	0.0325203	AMPLIFICATION	0	0	DEEP DELETION	0	0	mRNA HIGH	0	0	mRNA LOW	4	0.0325203	FUSION	0	0	MISSENSE, INFRAME, TRUNCATING MUTATIONS (PUTATIVE DRIVER)	0	0
PRKAA2	All	5	0.0406504	AMPLIFICATION	0	0	DEEP DELETION	0	0	mRNA HIGH	0	0	mRNA LOW	5	0.0406504	FUSION	0	0	MISSENSE, INFRAME, TRUNCATING MUTATIONS (PUTATIVE DRIVER)	0	0
PRKCG	All	9	0.0731707	AMPLIFICATION	0	0	DEEP DELETION	0	0	mRNA HIGH	0	0	mRNA LOW	9	0.0731707	FUSION	0	0	MISSENSE, INFRAME, TRUNCATING MUTATIONS (PUTATIVE DRIVER)	0	0
PRKDC	All	3	0.0243902	AMPLIFICATION	0	0	DEEP DELETION	0	0	mRNA HIGH	1	0.00813008	mRNA LOW	2	0.0162602	FUSION	0	0	MISSENSE, INFRAME, TRUNCATING MUTATIONS (PUTATIVE DRIVER)	0	0
PRKG1	All	2	0.0162602	AMPLIFICATION	0	0	DEEP DELETION	0	0	mRNA HIGH	2	0.0162602	mRNA LOW	0	0	FUSION	0	0	MISSENSE, INFRAME, TRUNCATING MUTATIONS (PUTATIVE DRIVER)	0	0
PRKG2	All	10	0.0813008	AMPLIFICATION	0	0	DEEP DELETION	0	0	mRNA HIGH	1	0.00813008	mRNA LOW	9	0.0731707	FUSION	0	0	MISSENSE, INFRAME, TRUNCATING MUTATIONS (PUTATIVE DRIVER)	0	0
PRMT5	All	10	0.0813008	AMPLIFICATION	1	0.00813008	DEEP DELETION	0	0	mRNA HIGH	4	0.0325203	mRNA LOW	5	0.0406504	FUSION	0	0	MISSENSE, INFRAME, TRUNCATING MUTATIONS (PUTATIVE DRIVER)	0	0
PROK1	All	5	0.0406504	AMPLIFICATION	0	0	DEEP DELETION	0	0	mRNA HIGH	5	0.0406504	mRNA LOW	0	0	FUSION	0	0	MISSENSE, INFRAME, TRUNCATING MUTATIONS (PUTATIVE DRIVER)	0	0
PROK2	All	7	0.0569106	AMPLIFICATION	0	0	DEEP DELETION	1	0.00813008	mRNA HIGH	6	0.0487805	mRNA LOW	0	0	FUSION	0	0	MISSENSE, INFRAME, TRUNCATING MUTATIONS (PUTATIVE DRIVER)	0	0
PROKR1	All	65	0.528455	AMPLIFICATION	0	0	DEEP DELETION	0	0	mRNA HIGH	1	0.00813008	mRNA LOW	64	0.520325	FUSION	0	0	MISSENSE, INFRAME, TRUNCATING MUTATIONS (PUTATIVE DRIVER)	0	0
PROKR2	All	3	0.0243902	AMPLIFICATION	0	0	DEEP DELETION	0	0	mRNA HIGH	3	0.0243902	mRNA LOW	0	0	FUSION	0	0	MISSENSE, INFRAME, TRUNCATING MUTATIONS (PUTATIVE DRIVER)	0	0
PROX1	All	6	0.0487805	AMPLIFICATION	3	0.0243902	DEEP DELETION	0	0	mRNA HIGH	3	0.0243902	mRNA LOW	0	0	FUSION	0	0	MISSENSE, INFRAME, TRUNCATING MUTATIONS (PUTATIVE DRIVER)	0	0
PSPC1	All	4	0.0325203	AMPLIFICATION	0	0	DEEP DELETION	0	0	mRNA HIGH	0	0	mRNA LOW	4	0.0325203	FUSION	0	0	MISSENSE, INFRAME, TRUNCATING MUTATIONS (PUTATIVE DRIVER)	0	0
PTEN	All	4	0.0325203	AMPLIFICATION	0	0	DEEP DELETION	0	0	mRNA HIGH	0	0	mRNA LOW	4	0.0325203	FUSION	0	0	MISSENSE, INFRAME, TRUNCATING MUTATIONS (PUTATIVE DRIVER)	0	0
PTGDS	All	9	0.0731707	AMPLIFICATION	0	0	DEEP DELETION	1	0.00813008	mRNA HIGH	3	0.0243902	mRNA LOW	5	0.0406504	FUSION	0	0	MISSENSE, INFRAME, TRUNCATING MUTATIONS (PUTATIVE DRIVER)	0	0
PTGER3	All	6	0.0487805	AMPLIFICATION	0	0	DEEP DELETION	1	0.00813008	mRNA HIGH	2	0.0162602	mRNA LOW	3	0.0243902	FUSION	0	0	MISSENSE, INFRAME, TRUNCATING MUTATIONS (PUTATIVE DRIVER)	0	0
PTGER4	All	8	0.0650407	AMPLIFICATION	0	0	DEEP DELETION	0	0	mRNA HIGH	1	0.00813008	mRNA LOW	7	0.0569106	FUSION	0	0	MISSENSE, INFRAME, TRUNCATING MUTATIONS (PUTATIVE DRIVER)	0	0
RAI1	All	6	0.0487805	AMPLIFICATION	0	0	DEEP DELETION	1	0.00813008	mRNA HIGH	0	0	mRNA LOW	4	0.0325203	FUSION	1	0.00813008	MISSENSE, INFRAME, TRUNCATING MUTATIONS (PUTATIVE DRIVER)	0	0
RBM4	All	7	0.0569106	AMPLIFICATION	0	0	DEEP DELETION	0	0	mRNA HIGH	6	0.0487805	mRNA LOW	1	0.00813008	FUSION	0	0	MISSENSE, INFRAME, TRUNCATING MUTATIONS (PUTATIVE DRIVER)	0	0
RBM4B	All	5	0.0406504	AMPLIFICATION	0	0	DEEP DELETION	0	0	mRNA HIGH	3	0.0243902	mRNA LOW	2	0.0162602	FUSION	0	0	MISSENSE, INFRAME, TRUNCATING MUTATIONS (PUTATIVE DRIVER)	0	0
RELB	All	8	0.0650407	AMPLIFICATION	0	0	DEEP DELETION	0	0	mRNA HIGH	5	0.0406504	mRNA LOW	3	0.0243902	FUSION	0	0	MISSENSE, INFRAME, TRUNCATING MUTATIONS (PUTATIVE DRIVER)	0	0
ROCK2	All	5	0.0406504	AMPLIFICATION	0	0	DEEP DELETION	0	0	mRNA HIGH	1	0.00813008	mRNA LOW	4	0.0325203	FUSION	0	0	MISSENSE, INFRAME, TRUNCATING MUTATIONS (PUTATIVE DRIVER)	0	0
RORA	All	3	0.0243902	AMPLIFICATION	0	0	DEEP DELETION	0	0	mRNA HIGH	1	0.00813008	mRNA LOW	2	0.0162602	FUSION	0	0	MISSENSE, INFRAME, TRUNCATING MUTATIONS (PUTATIVE DRIVER)	0	0
RORB	All	3	0.0243902	AMPLIFICATION	0	0	DEEP DELETION	1	0.00813008	mRNA HIGH	2	0.0162602	mRNA LOW	0	0	FUSION	0	0	MISSENSE, INFRAME, TRUNCATING MUTATIONS (PUTATIVE DRIVER)	0	0
RORC	All	8	0.0650407	AMPLIFICATION	1	0.00813008	DEEP DELETION	0	0	mRNA HIGH	0	0	mRNA LOW	7	0.0569106	FUSION	0	0	MISSENSE, INFRAME, TRUNCATING MUTATIONS (PUTATIVE DRIVER)	0	0
SETX	All	6	0.0487805	AMPLIFICATION	0	0	DEEP DELETION	1	0.00813008	mRNA HIGH	3	0.0243902	mRNA LOW	2	0.0162602	FUSION	0	0	MISSENSE, INFRAME, TRUNCATING MUTATIONS (PUTATIVE DRIVER)	0	0
SFPQ	All	5	0.0406504	AMPLIFICATION	0	0	DEEP DELETION	0	0	mRNA HIGH	0	0	mRNA LOW	5	0.0406504	FUSION	0	0	MISSENSE, INFRAME, TRUNCATING MUTATIONS (PUTATIVE DRIVER)	0	0
SIAH2	All	5	0.0406504	AMPLIFICATION	1	0.00813008	DEEP DELETION	0	0	mRNA HIGH	1	0.00813008	mRNA LOW	3	0.0243902	FUSION	0	0	MISSENSE, INFRAME, TRUNCATING MUTATIONS (PUTATIVE DRIVER)	0	0
SIK1	All	7	0.0569106	AMPLIFICATION	0	0	DEEP DELETION	1	0.00813008	mRNA HIGH	5	0.0406504	mRNA LOW	1	0.00813008	FUSION	0	0	MISSENSE, INFRAME, TRUNCATING MUTATIONS (PUTATIVE DRIVER)	0	0
SIN3A	All	5	0.0406504	AMPLIFICATION	0	0	DEEP DELETION	0	0	mRNA HIGH	0	0	mRNA LOW	5	0.0406504	FUSION	0	0	MISSENSE, INFRAME, TRUNCATING MUTATIONS (PUTATIVE DRIVER)	0	0
SIRT1	All	5	0.0406504	AMPLIFICATION	0	0	DEEP DELETION	0	0	mRNA HIGH	0	0	mRNA LOW	5	0.0406504	FUSION	0	0	MISSENSE, INFRAME, TRUNCATING MUTATIONS (PUTATIVE DRIVER)	0	0
SIX3	All	2	0.0162602	AMPLIFICATION	0	0	DEEP DELETION	0	0	mRNA HIGH	2	0.0162602	mRNA LOW	0	0	FUSION	0	0	MISSENSE, INFRAME, TRUNCATING MUTATIONS (PUTATIVE DRIVER)	0	0
SLC6A4	All	5	0.0406504	AMPLIFICATION	1	0.00813008	DEEP DELETION	0	0	mRNA HIGH	4	0.0325203	mRNA LOW	0	0	FUSION	0	0	MISSENSE, INFRAME, TRUNCATING MUTATIONS (PUTATIVE DRIVER)	0	0
SOX14	All	2	0.0162602	AMPLIFICATION	1	0.00813008	DEEP DELETION	0	0	mRNA HIGH	1	0.00813008	mRNA LOW	0	0	FUSION	0	0	MISSENSE, INFRAME, TRUNCATING MUTATIONS (PUTATIVE DRIVER)	0	0
SPSB4	All	11	0.0894309	AMPLIFICATION	1	0.00813008	DEEP DELETION	0	0	mRNA HIGH	0	0	mRNA LOW	10	0.0813008	FUSION	0	0	MISSENSE, INFRAME, TRUNCATING MUTATIONS (PUTATIVE DRIVER)	0	0
SRRD	All	8	0.0650407	AMPLIFICATION	0	0	DEEP DELETION	2	0.0162602	mRNA HIGH	4	0.0325203	mRNA LOW	2	0.0162602	FUSION	0	0	MISSENSE, INFRAME, TRUNCATING MUTATIONS (PUTATIVE DRIVER)	0	0
SUV39H1	All	7	0.0569106	AMPLIFICATION	0	0	DEEP DELETION	1	0.00813008	mRNA HIGH	1	0.00813008	mRNA LOW	5	0.0406504	FUSION	0	0	MISSENSE, INFRAME, TRUNCATING MUTATIONS (PUTATIVE DRIVER)	0	0
SUV39H2	All	7	0.0569106	AMPLIFICATION	0	0	DEEP DELETION	0	0	mRNA HIGH	0	0	mRNA LOW	7	0.0569106	FUSION	0	0	MISSENSE, INFRAME, TRUNCATING MUTATIONS (PUTATIVE DRIVER)	0	0
TARDBP	All	5	0.0406504	AMPLIFICATION	0	0	DEEP DELETION	0	0	mRNA HIGH	3	0.0243902	mRNA LOW	2	0.0162602	FUSION	0	0	MISSENSE, INFRAME, TRUNCATING MUTATIONS (PUTATIVE DRIVER)	0	0
THRAP3	All	6	0.0487805	AMPLIFICATION	0	0	DEEP DELETION	0	0	mRNA HIGH	1	0.00813008	mRNA LOW	5	0.0406504	FUSION	0	0	MISSENSE, INFRAME, TRUNCATING MUTATIONS (PUTATIVE DRIVER)	0	0
TIMELESS	All	3	0.0243902	AMPLIFICATION	0	0	DEEP DELETION	0	0	mRNA HIGH	0	0	mRNA LOW	3	0.0243902	FUSION	0	0	MISSENSE, INFRAME, TRUNCATING MUTATIONS (PUTATIVE DRIVER)	0	0
TNFRSF11A	All	7	0.0569106	AMPLIFICATION	0	0	DEEP DELETION	0	0	mRNA HIGH	4	0.0325203	mRNA LOW	3	0.0243902	FUSION	0	0	MISSENSE, INFRAME, TRUNCATING MUTATIONS (PUTATIVE DRIVER)	0	0
TOP1	All	5	0.0406504	AMPLIFICATION	0	0	DEEP DELETION	0	0	mRNA HIGH	0	0	mRNA LOW	5	0.0406504	FUSION	0	0	MISSENSE, INFRAME, TRUNCATING MUTATIONS (PUTATIVE DRIVER)	0	0
TOP2A	All	5	0.0406504	AMPLIFICATION	1	0.00813008	DEEP DELETION	0	0	mRNA HIGH	0	0	mRNA LOW	4	0.0325203	FUSION	0	0	MISSENSE, INFRAME, TRUNCATING MUTATIONS (PUTATIVE DRIVER)	0	0
TP53	All	11	0.0894309	AMPLIFICATION	0	0	DEEP DELETION	1	0.00813008	mRNA HIGH	1	0.00813008	mRNA LOW	5	0.0406504	FUSION	0	0	MISSENSE, INFRAME, TRUNCATING MUTATIONS (PUTATIVE DRIVER)	4	0.0325203
UBE3A	All	5	0.0406504	AMPLIFICATION	0	0	DEEP DELETION	0	0	mRNA HIGH	3	0.0243902	mRNA LOW	2	0.0162602	FUSION	0	0	MISSENSE, INFRAME, TRUNCATING MUTATIONS (PUTATIVE DRIVER)	0	0
USP2	All	4	0.0325203	AMPLIFICATION	0	0	DEEP DELETION	0	0	mRNA HIGH	0	0	mRNA LOW	4	0.0325203	FUSION	0	0	MISSENSE, INFRAME, TRUNCATING MUTATIONS (PUTATIVE DRIVER)	0	0
USP7	All	4	0.0325203	AMPLIFICATION	0	0	DEEP DELETION	0	0	mRNA HIGH	1	0.00813008	mRNA LOW	3	0.0243902	FUSION	0	0	MISSENSE, INFRAME, TRUNCATING MUTATIONS (PUTATIVE DRIVER)	0	0
USP9X	All	5	0.0406504	AMPLIFICATION	0	0	DEEP DELETION	1	0.00813008	mRNA HIGH	1	0.00813008	mRNA LOW	3	0.0243902	FUSION	0	0	MISSENSE, INFRAME, TRUNCATING MUTATIONS (PUTATIVE DRIVER)	0	0
UTS2	All	7	0.0569106	AMPLIFICATION	0	0	DEEP DELETION	0	0	mRNA HIGH	7	0.0569106	mRNA LOW	0	0	FUSION	0	0	MISSENSE, INFRAME, TRUNCATING MUTATIONS (PUTATIVE DRIVER)	0	0
UTS2R	All	4	0.0325203	AMPLIFICATION	1	0.00813008	DEEP DELETION	1	0.00813008	mRNA HIGH	2	0.0162602	mRNA LOW	0	0	FUSION	0	0	MISSENSE, INFRAME, TRUNCATING MUTATIONS (PUTATIVE DRIVER)	0	0
ZFHX3	All	6	0.0487805	AMPLIFICATION	0	0	DEEP DELETION	1	0.00813008	mRNA HIGH	4	0.0325203	mRNA LOW	1	0.00813008	FUSION	0	0	MISSENSE, INFRAME, TRUNCATING MUTATIONS (PUTATIVE DRIVER)	0	0
ZPBP2	All	5	0.0406504	AMPLIFICATION	1	0.00813008	DEEP DELETION	0	0	mRNA HIGH	4	0.0325203	mRNA LOW	0	0	FUSION	0	0	MISSENSE, INFRAME, TRUNCATING MUTATIONS (PUTATIVE DRIVER)	0	0

## Sheet: ST_9
Supplementary Table 9. Frequency of alterations belonging to 149 individuals with TCGA-TGCT
GENE	TYPE	TOTAL	f	TYPE	TOTAL	f	TYPE	TOTAL	f	TYPE	TOTAL	f	TYPE	TOTAL	f	TYPE	TOTAL	f	TYPE	TOTAL	f
AANAT	All	8	0.0536913	AMPLIFICATION	0	0	DEEP DELETION	0	0	mRNA HIGH	5	0.033557	mRNA LOW	3	0.0201342	FUSION	0	0	MISSENSE, INFRAME, TRUNCATING MUTATIONS (PUTATIVE DRIVER)	0	0
ADA	All	3	0.0201342	AMPLIFICATION	0	0	DEEP DELETION	0	0	mRNA HIGH	1	0.00671141	mRNA LOW	2	0.0134228	FUSION	0	0	MISSENSE, INFRAME, TRUNCATING MUTATIONS (PUTATIVE DRIVER)	0	0
ADCY1	All	4	0.0268456	AMPLIFICATION	0	0	DEEP DELETION	0	0	mRNA HIGH	0	0	mRNA LOW	4	0.0268456	FUSION	0	0	MISSENSE, INFRAME, TRUNCATING MUTATIONS (PUTATIVE DRIVER)	0	0
ADORA1	All	6	0.0402685	AMPLIFICATION	0	0	DEEP DELETION	0	0	mRNA HIGH	3	0.0201342	mRNA LOW	3	0.0201342	FUSION	0	0	MISSENSE, INFRAME, TRUNCATING MUTATIONS (PUTATIVE DRIVER)	0	0
ADORA2A	All	4	0.0268456	AMPLIFICATION	0	0	DEEP DELETION	0	0	mRNA HIGH	0	0	mRNA LOW	4	0.0268456	FUSION	0	0	MISSENSE, INFRAME, TRUNCATING MUTATIONS (PUTATIVE DRIVER)	0	0
ADRB1	All	16	0.107383	AMPLIFICATION	0	0	DEEP DELETION	0	0	mRNA HIGH	7	0.0469799	mRNA LOW	9	0.0604027	FUSION	0	0	MISSENSE, INFRAME, TRUNCATING MUTATIONS (PUTATIVE DRIVER)	0	0
AHCY	All	6	0.0402685	AMPLIFICATION	0	0	DEEP DELETION	0	0	mRNA HIGH	2	0.0134228	mRNA LOW	4	0.0268456	FUSION	0	0	MISSENSE, INFRAME, TRUNCATING MUTATIONS (PUTATIVE DRIVER)	0	0
AHR	All	8	0.0536913	AMPLIFICATION	1	0.00671141	DEEP DELETION	0	0	mRNA HIGH	6	0.0402685	mRNA LOW	1	0.00671141	FUSION	0	0	MISSENSE, INFRAME, TRUNCATING MUTATIONS (PUTATIVE DRIVER)	0	0
ALB	All	8	0.0536913	AMPLIFICATION	0	0	DEEP DELETION	0	0	mRNA HIGH	8	0.0536913	mRNA LOW	0	0	FUSION	0	0	MISSENSE, INFRAME, TRUNCATING MUTATIONS (PUTATIVE DRIVER)	0	0
ANKFN1	All	6	0.0402685	AMPLIFICATION	0	0	DEEP DELETION	0	0	mRNA HIGH	6	0.0402685	mRNA LOW	0	0	FUSION	0	0	MISSENSE, INFRAME, TRUNCATING MUTATIONS (PUTATIVE DRIVER)	0	0
ARNTL	All	7	0.0469799	AMPLIFICATION	0	0	DEEP DELETION	0	0	mRNA HIGH	4	0.0268456	mRNA LOW	3	0.0201342	FUSION	0	0	MISSENSE, INFRAME, TRUNCATING MUTATIONS (PUTATIVE DRIVER)	0	0
ARNTL2	All	18	0.120805	AMPLIFICATION	11	0.0738255	DEEP DELETION	0	0	mRNA HIGH	2	0.0134228	mRNA LOW	5	0.033557	FUSION	0	0	MISSENSE, INFRAME, TRUNCATING MUTATIONS (PUTATIVE DRIVER)	0	0
ASS1	All	5	0.033557	AMPLIFICATION	0	0	DEEP DELETION	0	0	mRNA HIGH	2	0.0134228	mRNA LOW	3	0.0201342	FUSION	0	0	MISSENSE, INFRAME, TRUNCATING MUTATIONS (PUTATIVE DRIVER)	0	0
ATF4	All	7	0.0469799	AMPLIFICATION	0	0	DEEP DELETION	1	0.00671141	mRNA HIGH	5	0.033557	mRNA LOW	1	0.00671141	FUSION	0	0	MISSENSE, INFRAME, TRUNCATING MUTATIONS (PUTATIVE DRIVER)	0	0
ATG7	All	4	0.0268456	AMPLIFICATION	0	0	DEEP DELETION	0	0	mRNA HIGH	3	0.0201342	mRNA LOW	1	0.00671141	FUSION	0	0	MISSENSE, INFRAME, TRUNCATING MUTATIONS (PUTATIVE DRIVER)	0	0
ATOH7	All	15	0.100671	AMPLIFICATION	0	0	DEEP DELETION	0	0	mRNA HIGH	6	0.0402685	mRNA LOW	9	0.0604027	FUSION	0	0	MISSENSE, INFRAME, TRUNCATING MUTATIONS (PUTATIVE DRIVER)	0	0
BHLHE40	All	7	0.0469799	AMPLIFICATION	0	0	DEEP DELETION	0	0	mRNA HIGH	3	0.0201342	mRNA LOW	4	0.0268456	FUSION	0	0	MISSENSE, INFRAME, TRUNCATING MUTATIONS (PUTATIVE DRIVER)	0	0
BHLHE41	All	20	0.134228	AMPLIFICATION	12	0.0805369	DEEP DELETION	0	0	mRNA HIGH	3	0.0201342	mRNA LOW	5	0.033557	FUSION	0	0	MISSENSE, INFRAME, TRUNCATING MUTATIONS (PUTATIVE DRIVER)	0	0
BTBD9	All	2	0.0134228	AMPLIFICATION	0	0	DEEP DELETION	0	0	mRNA HIGH	1	0.00671141	mRNA LOW	1	0.00671141	FUSION	0	0	MISSENSE, INFRAME, TRUNCATING MUTATIONS (PUTATIVE DRIVER)	0	0
BTRC	All	1	0.00671141	AMPLIFICATION	0	0	DEEP DELETION	0	0	mRNA HIGH	1	0.00671141	mRNA LOW	0	0	FUSION	0	0	MISSENSE, INFRAME, TRUNCATING MUTATIONS (PUTATIVE DRIVER)	0	0
CARTPT	All	3	0.0201342	AMPLIFICATION	0	0	DEEP DELETION	0	0	mRNA HIGH	3	0.0201342	mRNA LOW	0	0	FUSION	0	0	MISSENSE, INFRAME, TRUNCATING MUTATIONS (PUTATIVE DRIVER)	0	0
CASP1	All	9	0.0604027	AMPLIFICATION	0	0	DEEP DELETION	3	0.0201342	mRNA HIGH	2	0.0134228	mRNA LOW	4	0.0268456	FUSION	0	0	MISSENSE, INFRAME, TRUNCATING MUTATIONS (PUTATIVE DRIVER)	0	0
CAVIN3	All	3	0.0201342	AMPLIFICATION	0	0	DEEP DELETION	0	0	mRNA HIGH	1	0.00671141	mRNA LOW	2	0.0134228	FUSION	0	0	MISSENSE, INFRAME, TRUNCATING MUTATIONS (PUTATIVE DRIVER)	0	0
CCAR2	All	6	0.0402685	AMPLIFICATION	0	0	DEEP DELETION	1	0.00671141	mRNA HIGH	1	0.00671141	mRNA LOW	4	0.0268456	FUSION	0	0	MISSENSE, INFRAME, TRUNCATING MUTATIONS (PUTATIVE DRIVER)	0	0
CDK1	All	6	0.0402685	AMPLIFICATION	0	0	DEEP DELETION	1	0.00671141	mRNA HIGH	0	0	mRNA LOW	5	0.033557	FUSION	0	0	MISSENSE, INFRAME, TRUNCATING MUTATIONS (PUTATIVE DRIVER)	0	0
CHRNB2	All	7	0.0469799	AMPLIFICATION	0	0	DEEP DELETION	0	0	mRNA HIGH	5	0.033557	mRNA LOW	2	0.0134228	FUSION	0	0	MISSENSE, INFRAME, TRUNCATING MUTATIONS (PUTATIVE DRIVER)	0	0
CIART	All	6	0.0402685	AMPLIFICATION	0	0	DEEP DELETION	0	0	mRNA HIGH	2	0.0134228	mRNA LOW	4	0.0268456	FUSION	0	0	MISSENSE, INFRAME, TRUNCATING MUTATIONS (PUTATIVE DRIVER)	0	0
CIPC	All	10	0.0671141	AMPLIFICATION	0	0	DEEP DELETION	0	0	mRNA HIGH	5	0.033557	mRNA LOW	5	0.033557	FUSION	0	0	MISSENSE, INFRAME, TRUNCATING MUTATIONS (PUTATIVE DRIVER)	0	0
CLOCK	All	9	0.0604027	AMPLIFICATION	3	0.0201342	DEEP DELETION	0	0	mRNA HIGH	3	0.0201342	mRNA LOW	3	0.0201342	FUSION	0	0	MISSENSE, INFRAME, TRUNCATING MUTATIONS (PUTATIVE DRIVER)	0	0
CORT	All	9	0.0604027	AMPLIFICATION	0	0	DEEP DELETION	1	0.00671141	mRNA HIGH	3	0.0201342	mRNA LOW	5	0.033557	FUSION	0	0	MISSENSE, INFRAME, TRUNCATING MUTATIONS (PUTATIVE DRIVER)	0	0
CREB1	All	5	0.033557	AMPLIFICATION	0	0	DEEP DELETION	0	0	mRNA HIGH	2	0.0134228	mRNA LOW	3	0.0201342	FUSION	0	0	MISSENSE, INFRAME, TRUNCATING MUTATIONS (PUTATIVE DRIVER)	0	0
CREM	All	4	0.0268456	AMPLIFICATION	0	0	DEEP DELETION	1	0.00671141	mRNA HIGH	3	0.0201342	mRNA LOW	0	0	FUSION	0	0	MISSENSE, INFRAME, TRUNCATING MUTATIONS (PUTATIVE DRIVER)	0	0
CRTC1	All	4	0.0268456	AMPLIFICATION	0	0	DEEP DELETION	0	0	mRNA HIGH	3	0.0201342	mRNA LOW	1	0.00671141	FUSION	0	0	MISSENSE, INFRAME, TRUNCATING MUTATIONS (PUTATIVE DRIVER)	0	0
CRY1	All	4	0.0268456	AMPLIFICATION	0	0	DEEP DELETION	0	0	mRNA HIGH	0	0	mRNA LOW	4	0.0268456	FUSION	0	0	MISSENSE, INFRAME, TRUNCATING MUTATIONS (PUTATIVE DRIVER)	0	0
CRY2	All	10	0.0671141	AMPLIFICATION	0	0	DEEP DELETION	0	0	mRNA HIGH	2	0.0134228	mRNA LOW	8	0.0536913	FUSION	0	0	MISSENSE, INFRAME, TRUNCATING MUTATIONS (PUTATIVE DRIVER)	0	0
CSF2	All	8	0.0536913	AMPLIFICATION	0	0	DEEP DELETION	0	0	mRNA HIGH	8	0.0536913	mRNA LOW	0	0	FUSION	0	0	MISSENSE, INFRAME, TRUNCATING MUTATIONS (PUTATIVE DRIVER)	0	0
CSNK1D	All	8	0.0536913	AMPLIFICATION	0	0	DEEP DELETION	0	0	mRNA HIGH	3	0.0201342	mRNA LOW	5	0.033557	FUSION	0	0	MISSENSE, INFRAME, TRUNCATING MUTATIONS (PUTATIVE DRIVER)	0	0
CSNK1E	All	4	0.0268456	AMPLIFICATION	0	0	DEEP DELETION	1	0.00671141	mRNA HIGH	2	0.0134228	mRNA LOW	1	0.00671141	FUSION	0	0	MISSENSE, INFRAME, TRUNCATING MUTATIONS (PUTATIVE DRIVER)	0	0
CYP7B1	All	8	0.0536913	AMPLIFICATION	2	0.0134228	DEEP DELETION	1	0.00671141	mRNA HIGH	1	0.00671141	mRNA LOW	4	0.0268456	FUSION	0	0	MISSENSE, INFRAME, TRUNCATING MUTATIONS (PUTATIVE DRIVER)	0	0
DBP	All	7	0.0469799	AMPLIFICATION	0	0	DEEP DELETION	0	0	mRNA HIGH	5	0.033557	mRNA LOW	2	0.0134228	FUSION	0	0	MISSENSE, INFRAME, TRUNCATING MUTATIONS (PUTATIVE DRIVER)	0	0
DDB1	All	7	0.0469799	AMPLIFICATION	0	0	DEEP DELETION	1	0.00671141	mRNA HIGH	3	0.0201342	mRNA LOW	3	0.0201342	FUSION	0	0	MISSENSE, INFRAME, TRUNCATING MUTATIONS (PUTATIVE DRIVER)	0	0
DDX5	All	6	0.0402685	AMPLIFICATION	0	0	DEEP DELETION	0	0	mRNA HIGH	2	0.0134228	mRNA LOW	4	0.0268456	FUSION	0	0	MISSENSE, INFRAME, TRUNCATING MUTATIONS (PUTATIVE DRIVER)	0	0
DHX9	All	7	0.0469799	AMPLIFICATION	0	0	DEEP DELETION	0	0	mRNA HIGH	0	0	mRNA LOW	7	0.0469799	FUSION	0	0	MISSENSE, INFRAME, TRUNCATING MUTATIONS (PUTATIVE DRIVER)	0	0
DPYD	All	8	0.0536913	AMPLIFICATION	0	0	DEEP DELETION	1	0.00671141	mRNA HIGH	4	0.0268456	mRNA LOW	3	0.0201342	FUSION	0	0	MISSENSE, INFRAME, TRUNCATING MUTATIONS (PUTATIVE DRIVER)	0	0
DRD1	All	10	0.0671141	AMPLIFICATION	0	0	DEEP DELETION	1	0.00671141	mRNA HIGH	2	0.0134228	mRNA LOW	7	0.0469799	FUSION	0	0	MISSENSE, INFRAME, TRUNCATING MUTATIONS (PUTATIVE DRIVER)	0	0
DRD2	All	7	0.0469799	AMPLIFICATION	0	0	DEEP DELETION	5	0.033557	mRNA HIGH	2	0.0134228	mRNA LOW	0	0	FUSION	0	0	MISSENSE, INFRAME, TRUNCATING MUTATIONS (PUTATIVE DRIVER)	0	0
DRD3	All	118	0.791946	AMPLIFICATION	0	0	DEEP DELETION	0	0	mRNA HIGH	2	0.0134228	mRNA LOW	116	0.778523	FUSION	0	0	MISSENSE, INFRAME, TRUNCATING MUTATIONS (PUTATIVE DRIVER)	0	0
DRD4	All	10	0.0671141	AMPLIFICATION	0	0	DEEP DELETION	3	0.0201342	mRNA HIGH	5	0.033557	mRNA LOW	2	0.0134228	FUSION	0	0	MISSENSE, INFRAME, TRUNCATING MUTATIONS (PUTATIVE DRIVER)	0	0
DYRK1A	All	7	0.0469799	AMPLIFICATION	0	0	DEEP DELETION	0	0	mRNA HIGH	3	0.0201342	mRNA LOW	4	0.0268456	FUSION	0	0	MISSENSE, INFRAME, TRUNCATING MUTATIONS (PUTATIVE DRIVER)	0	0
EGR1	All	5	0.033557	AMPLIFICATION	0	0	DEEP DELETION	0	0	mRNA HIGH	4	0.0268456	mRNA LOW	1	0.00671141	FUSION	0	0	MISSENSE, INFRAME, TRUNCATING MUTATIONS (PUTATIVE DRIVER)	0	0
EP300	All	6	0.0402685	AMPLIFICATION	0	0	DEEP DELETION	1	0.00671141	mRNA HIGH	1	0.00671141	mRNA LOW	4	0.0268456	FUSION	0	0	MISSENSE, INFRAME, TRUNCATING MUTATIONS (PUTATIVE DRIVER)	0	0
EZH2	All	8	0.0536913	AMPLIFICATION	0	0	DEEP DELETION	0	0	mRNA HIGH	3	0.0201342	mRNA LOW	5	0.033557	FUSION	0	0	MISSENSE, INFRAME, TRUNCATING MUTATIONS (PUTATIVE DRIVER)	0	0
FBXL3	All	9	0.0604027	AMPLIFICATION	0	0	DEEP DELETION	0	0	mRNA HIGH	2	0.0134228	mRNA LOW	7	0.0469799	FUSION	0	0	MISSENSE, INFRAME, TRUNCATING MUTATIONS (PUTATIVE DRIVER)	0	0
FBXL6	All	8	0.0536913	AMPLIFICATION	1	0.00671141	DEEP DELETION	1	0.00671141	mRNA HIGH	5	0.033557	mRNA LOW	1	0.00671141	FUSION	0	0	MISSENSE, INFRAME, TRUNCATING MUTATIONS (PUTATIVE DRIVER)	0	0
FBXL8	All	12	0.0805369	AMPLIFICATION	1	0.00671141	DEEP DELETION	0	0	mRNA HIGH	5	0.033557	mRNA LOW	6	0.0402685	FUSION	0	0	MISSENSE, INFRAME, TRUNCATING MUTATIONS (PUTATIVE DRIVER)	0	0
FBXL12	All	6	0.0402685	AMPLIFICATION	0	0	DEEP DELETION	0	0	mRNA HIGH	5	0.033557	mRNA LOW	1	0.00671141	FUSION	0	0	MISSENSE, INFRAME, TRUNCATING MUTATIONS (PUTATIVE DRIVER)	0	0
FBXL17	All	9	0.0604027	AMPLIFICATION	0	0	DEEP DELETION	0	0	mRNA HIGH	4	0.0268456	mRNA LOW	5	0.033557	FUSION	0	0	MISSENSE, INFRAME, TRUNCATING MUTATIONS (PUTATIVE DRIVER)	0	0
FBXL21P	All	15	0.100671	AMPLIFICATION	0	0	DEEP DELETION	0	0	mRNA HIGH	3	0.0201342	mRNA LOW	12	0.0805369	FUSION	0	0	MISSENSE, INFRAME, TRUNCATING MUTATIONS (PUTATIVE DRIVER)	0	0
FBXL22	All	10	0.0671141	AMPLIFICATION	0	0	DEEP DELETION	0	0	mRNA HIGH	8	0.0536913	mRNA LOW	2	0.0134228	FUSION	0	0	MISSENSE, INFRAME, TRUNCATING MUTATIONS (PUTATIVE DRIVER)	0	0
FBXW7	All	8	0.0536913	AMPLIFICATION	0	0	DEEP DELETION	0	0	mRNA HIGH	6	0.0402685	mRNA LOW	2	0.0134228	FUSION	0	0	MISSENSE, INFRAME, TRUNCATING MUTATIONS (PUTATIVE DRIVER)	0	0
FBXW11	All	7	0.0469799	AMPLIFICATION	0	0	DEEP DELETION	0	0	mRNA HIGH	1	0.00671141	mRNA LOW	6	0.0402685	FUSION	0	0	MISSENSE, INFRAME, TRUNCATING MUTATIONS (PUTATIVE DRIVER)	0	0
GABRB3	All	5	0.033557	AMPLIFICATION	0	0	DEEP DELETION	0	0	mRNA HIGH	1	0.00671141	mRNA LOW	4	0.0268456	FUSION	0	0	MISSENSE, INFRAME, TRUNCATING MUTATIONS (PUTATIVE DRIVER)	0	0
GFPT1	All	7	0.0469799	AMPLIFICATION	0	0	DEEP DELETION	0	0	mRNA HIGH	6	0.0402685	mRNA LOW	1	0.00671141	FUSION	0	0	MISSENSE, INFRAME, TRUNCATING MUTATIONS (PUTATIVE DRIVER)	0	0
GHRH	All	3	0.0201342	AMPLIFICATION	0	0	DEEP DELETION	0	0	mRNA HIGH	3	0.0201342	mRNA LOW	0	0	FUSION	0	0	MISSENSE, INFRAME, TRUNCATING MUTATIONS (PUTATIVE DRIVER)	0	0
GHRHR	All	108	0.724832	AMPLIFICATION	0	0	DEEP DELETION	0	0	mRNA HIGH	2	0.0134228	mRNA LOW	106	0.711409	FUSION	0	0	MISSENSE, INFRAME, TRUNCATING MUTATIONS (PUTATIVE DRIVER)	0	0
GHRL	All	6	0.0402685	AMPLIFICATION	0	0	DEEP DELETION	0	0	mRNA HIGH	1	0.00671141	mRNA LOW	5	0.033557	FUSION	0	0	MISSENSE, INFRAME, TRUNCATING MUTATIONS (PUTATIVE DRIVER)	0	0
GPR157	All	10	0.0671141	AMPLIFICATION	0	0	DEEP DELETION	2	0.0134228	mRNA HIGH	2	0.0134228	mRNA LOW	6	0.0402685	FUSION	0	0	MISSENSE, INFRAME, TRUNCATING MUTATIONS (PUTATIVE DRIVER)	0	0
GPR176	All	3	0.0201342	AMPLIFICATION	0	0	DEEP DELETION	0	0	mRNA HIGH	2	0.0134228	mRNA LOW	1	0.00671141	FUSION	0	0	MISSENSE, INFRAME, TRUNCATING MUTATIONS (PUTATIVE DRIVER)	0	0
GSK3B	All	4	0.0268456	AMPLIFICATION	0	0	DEEP DELETION	0	0	mRNA HIGH	2	0.0134228	mRNA LOW	2	0.0134228	FUSION	0	0	MISSENSE, INFRAME, TRUNCATING MUTATIONS (PUTATIVE DRIVER)	0	0
HCRTR2	All	4	0.0268456	AMPLIFICATION	0	0	DEEP DELETION	0	0	mRNA HIGH	4	0.0268456	mRNA LOW	0	0	FUSION	0	0	MISSENSE, INFRAME, TRUNCATING MUTATIONS (PUTATIVE DRIVER)	0	0
HDAC1	All	2	0.0134228	AMPLIFICATION	0	0	DEEP DELETION	0	0	mRNA HIGH	2	0.0134228	mRNA LOW	0	0	FUSION	0	0	MISSENSE, INFRAME, TRUNCATING MUTATIONS (PUTATIVE DRIVER)	0	0
HDAC2	All	5	0.033557	AMPLIFICATION	0	0	DEEP DELETION	0	0	mRNA HIGH	2	0.0134228	mRNA LOW	3	0.0201342	FUSION	0	0	MISSENSE, INFRAME, TRUNCATING MUTATIONS (PUTATIVE DRIVER)	0	0
HDAC3	All	6	0.0402685	AMPLIFICATION	0	0	DEEP DELETION	0	0	mRNA HIGH	4	0.0268456	mRNA LOW	2	0.0134228	FUSION	0	0	MISSENSE, INFRAME, TRUNCATING MUTATIONS (PUTATIVE DRIVER)	0	0
HNF1B	All	3	0.0201342	AMPLIFICATION	0	0	DEEP DELETION	0	0	mRNA HIGH	3	0.0201342	mRNA LOW	0	0	FUSION	0	0	MISSENSE, INFRAME, TRUNCATING MUTATIONS (PUTATIVE DRIVER)	0	0
HNF4A	All	5	0.033557	AMPLIFICATION	0	0	DEEP DELETION	0	0	mRNA HIGH	3	0.0201342	mRNA LOW	2	0.0134228	FUSION	0	0	MISSENSE, INFRAME, TRUNCATING MUTATIONS (PUTATIVE DRIVER)	0	0
HNRNPD	All	4	0.0268456	AMPLIFICATION	0	0	DEEP DELETION	0	0	mRNA HIGH	3	0.0201342	mRNA LOW	1	0.00671141	FUSION	0	0	MISSENSE, INFRAME, TRUNCATING MUTATIONS (PUTATIVE DRIVER)	0	0
HNRNPU	All	7	0.0469799	AMPLIFICATION	0	0	DEEP DELETION	0	0	mRNA HIGH	3	0.0201342	mRNA LOW	4	0.0268456	FUSION	0	0	MISSENSE, INFRAME, TRUNCATING MUTATIONS (PUTATIVE DRIVER)	0	0
HS3ST2	All	8	0.0536913	AMPLIFICATION	0	0	DEEP DELETION	0	0	mRNA HIGH	3	0.0201342	mRNA LOW	5	0.033557	FUSION	0	0	MISSENSE, INFRAME, TRUNCATING MUTATIONS (PUTATIVE DRIVER)	0	0
HTR7	All	10	0.0671141	AMPLIFICATION	0	0	DEEP DELETION	0	0	mRNA HIGH	4	0.0268456	mRNA LOW	6	0.0402685	FUSION	0	0	MISSENSE, INFRAME, TRUNCATING MUTATIONS (PUTATIVE DRIVER)	0	0
HUWE1	All	6	0.0402685	AMPLIFICATION	0	0	DEEP DELETION	1	0.00671141	mRNA HIGH	2	0.0134228	mRNA LOW	3	0.0201342	FUSION	0	0	MISSENSE, INFRAME, TRUNCATING MUTATIONS (PUTATIVE DRIVER)	0	0
ID1	All	11	0.0738255	AMPLIFICATION	6	0.0402685	DEEP DELETION	0	0	mRNA HIGH	2	0.0134228	mRNA LOW	3	0.0201342	FUSION	0	0	MISSENSE, INFRAME, TRUNCATING MUTATIONS (PUTATIVE DRIVER)	0	0
ID2	All	7	0.0469799	AMPLIFICATION	0	0	DEEP DELETION	0	0	mRNA HIGH	6	0.0402685	mRNA LOW	1	0.00671141	FUSION	0	0	MISSENSE, INFRAME, TRUNCATING MUTATIONS (PUTATIVE DRIVER)	0	0
ID3	All	2	0.0134228	AMPLIFICATION	0	0	DEEP DELETION	1	0.00671141	mRNA HIGH	1	0.00671141	mRNA LOW	0	0	FUSION	0	0	MISSENSE, INFRAME, TRUNCATING MUTATIONS (PUTATIVE DRIVER)	0	0
ID4	All	9	0.0604027	AMPLIFICATION	0	0	DEEP DELETION	0	0	mRNA HIGH	3	0.0201342	mRNA LOW	6	0.0402685	FUSION	0	0	MISSENSE, INFRAME, TRUNCATING MUTATIONS (PUTATIVE DRIVER)	0	0
IL6	All	9	0.0604027	AMPLIFICATION	1	0.00671141	DEEP DELETION	0	0	mRNA HIGH	2	0.0134228	mRNA LOW	6	0.0402685	FUSION	0	0	MISSENSE, INFRAME, TRUNCATING MUTATIONS (PUTATIVE DRIVER)	0	0
IMPDH2	All	4	0.0268456	AMPLIFICATION	0	0	DEEP DELETION	0	0	mRNA HIGH	3	0.0201342	mRNA LOW	1	0.00671141	FUSION	0	0	MISSENSE, INFRAME, TRUNCATING MUTATIONS (PUTATIVE DRIVER)	0	0
KCNA2	All	7	0.0469799	AMPLIFICATION	0	0	DEEP DELETION	0	0	mRNA HIGH	2	0.0134228	mRNA LOW	5	0.033557	FUSION	0	0	MISSENSE, INFRAME, TRUNCATING MUTATIONS (PUTATIVE DRIVER)	0	0
KCND2	All	8	0.0536913	AMPLIFICATION	0	0	DEEP DELETION	0	0	mRNA HIGH	5	0.033557	mRNA LOW	3	0.0201342	FUSION	0	0	MISSENSE, INFRAME, TRUNCATING MUTATIONS (PUTATIVE DRIVER)	0	0
KCNMA1	All	10	0.0671141	AMPLIFICATION	0	0	DEEP DELETION	0	0	mRNA HIGH	7	0.0469799	mRNA LOW	3	0.0201342	FUSION	0	0	MISSENSE, INFRAME, TRUNCATING MUTATIONS (PUTATIVE DRIVER)	0	0
KDM2A	All	5	0.033557	AMPLIFICATION	0	0	DEEP DELETION	0	0	mRNA HIGH	1	0.00671141	mRNA LOW	4	0.0268456	FUSION	0	0	MISSENSE, INFRAME, TRUNCATING MUTATIONS (PUTATIVE DRIVER)	0	0
KDM5A	All	14	0.0939597	AMPLIFICATION	8	0.0536913	DEEP DELETION	0	0	mRNA HIGH	4	0.0268456	mRNA LOW	2	0.0134228	FUSION	0	0	MISSENSE, INFRAME, TRUNCATING MUTATIONS (PUTATIVE DRIVER)	0	0
KDM5B	All	5	0.033557	AMPLIFICATION	0	0	DEEP DELETION	0	0	mRNA HIGH	1	0.00671141	mRNA LOW	4	0.0268456	FUSION	0	0	MISSENSE, INFRAME, TRUNCATING MUTATIONS (PUTATIVE DRIVER)	0	0
KDM5C	All	10	0.0671141	AMPLIFICATION	0	0	DEEP DELETION	2	0.0134228	mRNA HIGH	3	0.0201342	mRNA LOW	5	0.033557	FUSION	0	0	MISSENSE, INFRAME, TRUNCATING MUTATIONS (PUTATIVE DRIVER)	0	0
KDM8	All	7	0.0469799	AMPLIFICATION	0	0	DEEP DELETION	0	0	mRNA HIGH	2	0.0134228	mRNA LOW	5	0.033557	FUSION	0	0	MISSENSE, INFRAME, TRUNCATING MUTATIONS (PUTATIVE DRIVER)	0	0
KLF10	All	11	0.0738255	AMPLIFICATION	2	0.0134228	DEEP DELETION	0	0	mRNA HIGH	3	0.0201342	mRNA LOW	6	0.0402685	FUSION	0	0	MISSENSE, INFRAME, TRUNCATING MUTATIONS (PUTATIVE DRIVER)	0	0
KMT2A	All	10	0.0671141	AMPLIFICATION	0	0	DEEP DELETION	4	0.0268456	mRNA HIGH	1	0.00671141	mRNA LOW	5	0.033557	FUSION	0	0	MISSENSE, INFRAME, TRUNCATING MUTATIONS (PUTATIVE DRIVER)	0	0
LEPR	All	8	0.0536913	AMPLIFICATION	0	0	DEEP DELETION	0	0	mRNA HIGH	8	0.0536913	mRNA LOW	0	0	FUSION	0	0	MISSENSE, INFRAME, TRUNCATING MUTATIONS (PUTATIVE DRIVER)	0	0
LGR4	All	5	0.033557	AMPLIFICATION	0	0	DEEP DELETION	0	0	mRNA HIGH	2	0.0134228	mRNA LOW	3	0.0201342	FUSION	0	0	MISSENSE, INFRAME, TRUNCATING MUTATIONS (PUTATIVE DRIVER)	0	0
MAGED1	All	8	0.0536913	AMPLIFICATION	0	0	DEEP DELETION	1	0.00671141	mRNA HIGH	5	0.033557	mRNA LOW	2	0.0134228	FUSION	0	0	MISSENSE, INFRAME, TRUNCATING MUTATIONS (PUTATIVE DRIVER)	0	0
MAGEL2	All	7	0.0469799	AMPLIFICATION	0	0	DEEP DELETION	0	0	mRNA HIGH	3	0.0201342	mRNA LOW	4	0.0268456	FUSION	0	0	MISSENSE, INFRAME, TRUNCATING MUTATIONS (PUTATIVE DRIVER)	0	0
MAPK8	All	10	0.0671141	AMPLIFICATION	0	0	DEEP DELETION	1	0.00671141	mRNA HIGH	0	0	mRNA LOW	9	0.0604027	FUSION	0	0	MISSENSE, INFRAME, TRUNCATING MUTATIONS (PUTATIVE DRIVER)	0	0
MAPK9	All	7	0.0469799	AMPLIFICATION	0	0	DEEP DELETION	1	0.00671141	mRNA HIGH	5	0.033557	mRNA LOW	1	0.00671141	FUSION	0	0	MISSENSE, INFRAME, TRUNCATING MUTATIONS (PUTATIVE DRIVER)	0	0
MAPK10	All	3	0.0201342	AMPLIFICATION	0	0	DEEP DELETION	1	0.00671141	mRNA HIGH	2	0.0134228	mRNA LOW	0	0	FUSION	0	0	MISSENSE, INFRAME, TRUNCATING MUTATIONS (PUTATIVE DRIVER)	0	0
MAT2A	All	9	0.0604027	AMPLIFICATION	0	0	DEEP DELETION	0	0	mRNA HIGH	1	0.00671141	mRNA LOW	8	0.0536913	FUSION	0	0	MISSENSE, INFRAME, TRUNCATING MUTATIONS (PUTATIVE DRIVER)	0	0
MC3R	All	1	0.00671141	AMPLIFICATION	0	0	DEEP DELETION	0	0	mRNA HIGH	1	0.00671141	mRNA LOW	0	0	FUSION	0	0	MISSENSE, INFRAME, TRUNCATING MUTATIONS (PUTATIVE DRIVER)	0	0
METTL3	All	5	0.033557	AMPLIFICATION	0	0	DEEP DELETION	0	0	mRNA HIGH	4	0.0268456	mRNA LOW	1	0.00671141	FUSION	0	0	MISSENSE, INFRAME, TRUNCATING MUTATIONS (PUTATIVE DRIVER)	0	0
MTA1	All	9	0.0604027	AMPLIFICATION	0	0	DEEP DELETION	1	0.00671141	mRNA HIGH	5	0.033557	mRNA LOW	3	0.0201342	FUSION	0	0	MISSENSE, INFRAME, TRUNCATING MUTATIONS (PUTATIVE DRIVER)	0	0
MTNR1A	All	3	0.0201342	AMPLIFICATION	0	0	DEEP DELETION	0	0	mRNA HIGH	3	0.0201342	mRNA LOW	0	0	FUSION	0	0	MISSENSE, INFRAME, TRUNCATING MUTATIONS (PUTATIVE DRIVER)	0	0
MTNR1B	All	125	0.838926	AMPLIFICATION	1	0.00671141	DEEP DELETION	2	0.0134228	mRNA HIGH	2	0.0134228	mRNA LOW	120	0.805369	FUSION	0	0	MISSENSE, INFRAME, TRUNCATING MUTATIONS (PUTATIVE DRIVER)	0	0
MTOR	All	6	0.0402685	AMPLIFICATION	0	0	DEEP DELETION	1	0.00671141	mRNA HIGH	2	0.0134228	mRNA LOW	3	0.0201342	FUSION	0	0	MISSENSE, INFRAME, TRUNCATING MUTATIONS (PUTATIVE DRIVER)	0	0
SLC25A19	All	7	0.0469799	AMPLIFICATION	0	0	DEEP DELETION	0	0	mRNA HIGH	3	0.0201342	mRNA LOW	4	0.0268456	FUSION	0	0	MISSENSE, INFRAME, TRUNCATING MUTATIONS (PUTATIVE DRIVER)	0	0
MYBBP1A	All	4	0.0268456	AMPLIFICATION	0	0	DEEP DELETION	0	0	mRNA HIGH	1	0.00671141	mRNA LOW	3	0.0201342	FUSION	0	0	MISSENSE, INFRAME, TRUNCATING MUTATIONS (PUTATIVE DRIVER)	0	0
MYCBP2	All	5	0.033557	AMPLIFICATION	0	0	DEEP DELETION	0	0	mRNA HIGH	1	0.00671141	mRNA LOW	4	0.0268456	FUSION	0	0	MISSENSE, INFRAME, TRUNCATING MUTATIONS (PUTATIVE DRIVER)	0	0
NAGLU	All	8	0.0536913	AMPLIFICATION	0	0	DEEP DELETION	0	0	mRNA HIGH	3	0.0201342	mRNA LOW	5	0.033557	FUSION	0	0	MISSENSE, INFRAME, TRUNCATING MUTATIONS (PUTATIVE DRIVER)	0	0
NAMPT	All	4	0.0268456	AMPLIFICATION	1	0.00671141	DEEP DELETION	0	0	mRNA HIGH	3	0.0201342	mRNA LOW	0	0	FUSION	0	0	MISSENSE, INFRAME, TRUNCATING MUTATIONS (PUTATIVE DRIVER)	0	0
NCOA2	All	8	0.0536913	AMPLIFICATION	3	0.0201342	DEEP DELETION	0	0	mRNA HIGH	0	0	mRNA LOW	5	0.033557	FUSION	0	0	MISSENSE, INFRAME, TRUNCATING MUTATIONS (PUTATIVE DRIVER)	0	0
NCOR1	All	9	0.0604027	AMPLIFICATION	2	0.0134228	DEEP DELETION	0	0	mRNA HIGH	1	0.00671141	mRNA LOW	6	0.0402685	FUSION	0	0	MISSENSE, INFRAME, TRUNCATING MUTATIONS (PUTATIVE DRIVER)	0	0
NDUFA9	All	15	0.100671	AMPLIFICATION	9	0.0604027	DEEP DELETION	0	0	mRNA HIGH	3	0.0201342	mRNA LOW	3	0.0201342	FUSION	0	0	MISSENSE, INFRAME, TRUNCATING MUTATIONS (PUTATIVE DRIVER)	0	0
NFIL3	All	10	0.0671141	AMPLIFICATION	0	0	DEEP DELETION	0	0	mRNA HIGH	4	0.0268456	mRNA LOW	6	0.0402685	FUSION	0	0	MISSENSE, INFRAME, TRUNCATING MUTATIONS (PUTATIVE DRIVER)	0	0
NGFR	All	5	0.033557	AMPLIFICATION	0	0	DEEP DELETION	0	0	mRNA HIGH	0	0	mRNA LOW	5	0.033557	FUSION	0	0	MISSENSE, INFRAME, TRUNCATING MUTATIONS (PUTATIVE DRIVER)	0	0
NKX2-1	All	6	0.0402685	AMPLIFICATION	0	0	DEEP DELETION	0	0	mRNA HIGH	6	0.0402685	mRNA LOW	0	0	FUSION	0	0	MISSENSE, INFRAME, TRUNCATING MUTATIONS (PUTATIVE DRIVER)	0	0
NLGN1	All	9	0.0604027	AMPLIFICATION	2	0.0134228	DEEP DELETION	0	0	mRNA HIGH	4	0.0268456	mRNA LOW	3	0.0201342	FUSION	0	0	MISSENSE, INFRAME, TRUNCATING MUTATIONS (PUTATIVE DRIVER)	0	0
NMS	All	0	0	AMPLIFICATION	0	0	DEEP DELETION	0	0	mRNA HIGH	0	0	mRNA LOW	0	0	FUSION	0	0	MISSENSE, INFRAME, TRUNCATING MUTATIONS (PUTATIVE DRIVER)	0	0
NMU	All	10	0.0671141	AMPLIFICATION	3	0.0201342	DEEP DELETION	0	0	mRNA HIGH	1	0.00671141	mRNA LOW	6	0.0402685	FUSION	0	0	MISSENSE, INFRAME, TRUNCATING MUTATIONS (PUTATIVE DRIVER)	0	0
NOCT	All	5	0.033557	AMPLIFICATION	0	0	DEEP DELETION	0	0	mRNA HIGH	0	0	mRNA LOW	5	0.033557	FUSION	0	0	MISSENSE, INFRAME, TRUNCATING MUTATIONS (PUTATIVE DRIVER)	0	0
NONO	All	6	0.0402685	AMPLIFICATION	0	0	DEEP DELETION	0	0	mRNA HIGH	2	0.0134228	mRNA LOW	4	0.0268456	FUSION	0	0	MISSENSE, INFRAME, TRUNCATING MUTATIONS (PUTATIVE DRIVER)	0	0
NPAS2	All	5	0.033557	AMPLIFICATION	0	0	DEEP DELETION	0	0	mRNA HIGH	4	0.0268456	mRNA LOW	1	0.00671141	FUSION	0	0	MISSENSE, INFRAME, TRUNCATING MUTATIONS (PUTATIVE DRIVER)	0	0
NPS	All	149	1	AMPLIFICATION	0	0	DEEP DELETION	4	0.0268456	mRNA HIGH	0	0	mRNA LOW	145	0.973154	FUSION	0	0	MISSENSE, INFRAME, TRUNCATING MUTATIONS (PUTATIVE DRIVER)	0	0
NPY2R	All	6	0.0402685	AMPLIFICATION	0	0	DEEP DELETION	0	0	mRNA HIGH	6	0.0402685	mRNA LOW	0	0	FUSION	0	0	MISSENSE, INFRAME, TRUNCATING MUTATIONS (PUTATIVE DRIVER)	0	0
NR0B2	All	9	0.0604027	AMPLIFICATION	0	0	DEEP DELETION	0	0	mRNA HIGH	9	0.0604027	mRNA LOW	0	0	FUSION	0	0	MISSENSE, INFRAME, TRUNCATING MUTATIONS (PUTATIVE DRIVER)	0	0
NR1D1	All	8	0.0536913	AMPLIFICATION	0	0	DEEP DELETION	0	0	mRNA HIGH	3	0.0201342	mRNA LOW	5	0.033557	FUSION	0	0	MISSENSE, INFRAME, TRUNCATING MUTATIONS (PUTATIVE DRIVER)	0	0
NR1D2	All	2	0.0134228	AMPLIFICATION	0	0	DEEP DELETION	0	0	mRNA HIGH	1	0.00671141	mRNA LOW	1	0.00671141	FUSION	0	0	MISSENSE, INFRAME, TRUNCATING MUTATIONS (PUTATIVE DRIVER)	0	0
NR2F6	All	8	0.0536913	AMPLIFICATION	0	0	DEEP DELETION	0	0	mRNA HIGH	2	0.0134228	mRNA LOW	6	0.0402685	FUSION	0	0	MISSENSE, INFRAME, TRUNCATING MUTATIONS (PUTATIVE DRIVER)	0	0
NRIP1	All	6	0.0402685	AMPLIFICATION	1	0.00671141	DEEP DELETION	0	0	mRNA HIGH	3	0.0201342	mRNA LOW	2	0.0134228	FUSION	0	0	MISSENSE, INFRAME, TRUNCATING MUTATIONS (PUTATIVE DRIVER)	0	0
OGT	All	8	0.0536913	AMPLIFICATION	0	0	DEEP DELETION	0	0	mRNA HIGH	2	0.0134228	mRNA LOW	6	0.0402685	FUSION	0	0	MISSENSE, INFRAME, TRUNCATING MUTATIONS (PUTATIVE DRIVER)	0	0
OPN4	All	4	0.0268456	AMPLIFICATION	0	0	DEEP DELETION	0	0	mRNA HIGH	4	0.0268456	mRNA LOW	0	0	FUSION	0	0	MISSENSE, INFRAME, TRUNCATING MUTATIONS (PUTATIVE DRIVER)	0	0
OPN5	All	4	0.0268456	AMPLIFICATION	0	0	DEEP DELETION	0	0	mRNA HIGH	4	0.0268456	mRNA LOW	0	0	FUSION	0	0	MISSENSE, INFRAME, TRUNCATING MUTATIONS (PUTATIVE DRIVER)	0	0
OPRL1	All	8	0.0536913	AMPLIFICATION	0	0	DEEP DELETION	0	0	mRNA HIGH	4	0.0268456	mRNA LOW	4	0.0268456	FUSION	0	0	MISSENSE, INFRAME, TRUNCATING MUTATIONS (PUTATIVE DRIVER)	0	0
PDE6B	All	11	0.0738255	AMPLIFICATION	0	0	DEEP DELETION	1	0.00671141	mRNA HIGH	5	0.033557	mRNA LOW	5	0.033557	FUSION	0	0	MISSENSE, INFRAME, TRUNCATING MUTATIONS (PUTATIVE DRIVER)	0	0
PER1	All	11	0.0738255	AMPLIFICATION	0	0	DEEP DELETION	0	0	mRNA HIGH	8	0.0536913	mRNA LOW	3	0.0201342	FUSION	0	0	MISSENSE, INFRAME, TRUNCATING MUTATIONS (PUTATIVE DRIVER)	0	0
PER2	All	7	0.0469799	AMPLIFICATION	0	0	DEEP DELETION	1	0.00671141	mRNA HIGH	3	0.0201342	mRNA LOW	3	0.0201342	FUSION	0	0	MISSENSE, INFRAME, TRUNCATING MUTATIONS (PUTATIVE DRIVER)	0	0
PER3	All	10	0.0671141	AMPLIFICATION	0	0	DEEP DELETION	2	0.0134228	mRNA HIGH	3	0.0201342	mRNA LOW	5	0.033557	FUSION	0	0	MISSENSE, INFRAME, TRUNCATING MUTATIONS (PUTATIVE DRIVER)	0	0
PHLPP1	All	10	0.0671141	AMPLIFICATION	0	0	DEEP DELETION	3	0.0201342	mRNA HIGH	2	0.0134228	mRNA LOW	5	0.033557	FUSION	0	0	MISSENSE, INFRAME, TRUNCATING MUTATIONS (PUTATIVE DRIVER)	0	0
PIWIL2	All	6	0.0402685	AMPLIFICATION	0	0	DEEP DELETION	1	0.00671141	mRNA HIGH	0	0	mRNA LOW	5	0.033557	FUSION	0	0	MISSENSE, INFRAME, TRUNCATING MUTATIONS (PUTATIVE DRIVER)	0	0
PMCH	All	7	0.0469799	AMPLIFICATION	0	0	DEEP DELETION	0	0	mRNA HIGH	7	0.0469799	mRNA LOW	0	0	FUSION	0	0	MISSENSE, INFRAME, TRUNCATING MUTATIONS (PUTATIVE DRIVER)	0	0
PML	All	6	0.0402685	AMPLIFICATION	0	0	DEEP DELETION	0	0	mRNA HIGH	4	0.0268456	mRNA LOW	2	0.0134228	FUSION	0	0	MISSENSE, INFRAME, TRUNCATING MUTATIONS (PUTATIVE DRIVER)	0	0
PPARA	All	7	0.0469799	AMPLIFICATION	0	0	DEEP DELETION	1	0.00671141	mRNA HIGH	5	0.033557	mRNA LOW	1	0.00671141	FUSION	0	0	MISSENSE, INFRAME, TRUNCATING MUTATIONS (PUTATIVE DRIVER)	0	0
PPARG	All	7	0.0469799	AMPLIFICATION	0	0	DEEP DELETION	0	0	mRNA HIGH	0	0	mRNA LOW	7	0.0469799	FUSION	0	0	MISSENSE, INFRAME, TRUNCATING MUTATIONS (PUTATIVE DRIVER)	0	0
PPARGC1A	All	10	0.0671141	AMPLIFICATION	1	0.00671141	DEEP DELETION	0	0	mRNA HIGH	8	0.0536913	mRNA LOW	1	0.00671141	FUSION	0	0	MISSENSE, INFRAME, TRUNCATING MUTATIONS (PUTATIVE DRIVER)	0	0
PPP1CA	All	6	0.0402685	AMPLIFICATION	0	0	DEEP DELETION	0	0	mRNA HIGH	2	0.0134228	mRNA LOW	4	0.0268456	FUSION	0	0	MISSENSE, INFRAME, TRUNCATING MUTATIONS (PUTATIVE DRIVER)	0	0
PPP1CB	All	6	0.0402685	AMPLIFICATION	0	0	DEEP DELETION	0	0	mRNA HIGH	2	0.0134228	mRNA LOW	4	0.0268456	FUSION	0	0	MISSENSE, INFRAME, TRUNCATING MUTATIONS (PUTATIVE DRIVER)	0	0
PPP1CC	All	3	0.0201342	AMPLIFICATION	0	0	DEEP DELETION	0	0	mRNA HIGH	3	0.0201342	mRNA LOW	0	0	FUSION	0	0	MISSENSE, INFRAME, TRUNCATING MUTATIONS (PUTATIVE DRIVER)	0	0
PRF1	All	7	0.0469799	AMPLIFICATION	0	0	DEEP DELETION	0	0	mRNA HIGH	3	0.0201342	mRNA LOW	4	0.0268456	FUSION	0	0	MISSENSE, INFRAME, TRUNCATING MUTATIONS (PUTATIVE DRIVER)	0	0
PRKAA1	All	9	0.0604027	AMPLIFICATION	0	0	DEEP DELETION	0	0	mRNA HIGH	2	0.0134228	mRNA LOW	7	0.0469799	FUSION	0	0	MISSENSE, INFRAME, TRUNCATING MUTATIONS (PUTATIVE DRIVER)	0	0
PRKAA2	All	5	0.033557	AMPLIFICATION	0	0	DEEP DELETION	0	0	mRNA HIGH	2	0.0134228	mRNA LOW	3	0.0201342	FUSION	0	0	MISSENSE, INFRAME, TRUNCATING MUTATIONS (PUTATIVE DRIVER)	0	0
PRKCG	All	6	0.0402685	AMPLIFICATION	0	0	DEEP DELETION	0	0	mRNA HIGH	0	0	mRNA LOW	6	0.0402685	FUSION	0	0	MISSENSE, INFRAME, TRUNCATING MUTATIONS (PUTATIVE DRIVER)	0	0
PRKDC	All	9	0.0604027	AMPLIFICATION	1	0.00671141	DEEP DELETION	1	0.00671141	mRNA HIGH	1	0.00671141	mRNA LOW	6	0.0402685	FUSION	0	0	MISSENSE, INFRAME, TRUNCATING MUTATIONS (PUTATIVE DRIVER)	0	0
PRKG1	All	17	0.114094	AMPLIFICATION	0	0	DEEP DELETION	3	0.0201342	mRNA HIGH	8	0.0536913	mRNA LOW	6	0.0402685	FUSION	0	0	MISSENSE, INFRAME, TRUNCATING MUTATIONS (PUTATIVE DRIVER)	0	0
PRKG2	All	7	0.0469799	AMPLIFICATION	0	0	DEEP DELETION	0	0	mRNA HIGH	5	0.033557	mRNA LOW	2	0.0134228	FUSION	0	0	MISSENSE, INFRAME, TRUNCATING MUTATIONS (PUTATIVE DRIVER)	0	0
PRMT5	All	9	0.0604027	AMPLIFICATION	0	0	DEEP DELETION	0	0	mRNA HIGH	0	0	mRNA LOW	9	0.0604027	FUSION	0	0	MISSENSE, INFRAME, TRUNCATING MUTATIONS (PUTATIVE DRIVER)	0	0
PROK1	All	11	0.0738255	AMPLIFICATION	0	0	DEEP DELETION	0	0	mRNA HIGH	11	0.0738255	mRNA LOW	0	0	FUSION	0	0	MISSENSE, INFRAME, TRUNCATING MUTATIONS (PUTATIVE DRIVER)	0	0
PROK2	All	10	0.0671141	AMPLIFICATION	1	0.00671141	DEEP DELETION	0	0	mRNA HIGH	2	0.0134228	mRNA LOW	7	0.0469799	FUSION	0	0	MISSENSE, INFRAME, TRUNCATING MUTATIONS (PUTATIVE DRIVER)	0	0
PROKR1	All	5	0.033557	AMPLIFICATION	0	0	DEEP DELETION	0	0	mRNA HIGH	5	0.033557	mRNA LOW	0	0	FUSION	0	0	MISSENSE, INFRAME, TRUNCATING MUTATIONS (PUTATIVE DRIVER)	0	0
PROKR2	All	7	0.0469799	AMPLIFICATION	0	0	DEEP DELETION	0	0	mRNA HIGH	7	0.0469799	mRNA LOW	0	0	FUSION	0	0	MISSENSE, INFRAME, TRUNCATING MUTATIONS (PUTATIVE DRIVER)	0	0
PROX1	All	7	0.0469799	AMPLIFICATION	0	0	DEEP DELETION	1	0.00671141	mRNA HIGH	6	0.0402685	mRNA LOW	0	0	FUSION	0	0	MISSENSE, INFRAME, TRUNCATING MUTATIONS (PUTATIVE DRIVER)	0	0
PSPC1	All	6	0.0402685	AMPLIFICATION	0	0	DEEP DELETION	0	0	mRNA HIGH	1	0.00671141	mRNA LOW	5	0.033557	FUSION	0	0	MISSENSE, INFRAME, TRUNCATING MUTATIONS (PUTATIVE DRIVER)	0	0
PTEN	All	4	0.0268456	AMPLIFICATION	0	0	DEEP DELETION	1	0.00671141	mRNA HIGH	2	0.0134228	mRNA LOW	1	0.00671141	FUSION	0	0	MISSENSE, INFRAME, TRUNCATING MUTATIONS (PUTATIVE DRIVER)	0	0
PTGDS	All	3	0.0201342	AMPLIFICATION	0	0	DEEP DELETION	1	0.00671141	mRNA HIGH	0	0	mRNA LOW	2	0.0134228	FUSION	0	0	MISSENSE, INFRAME, TRUNCATING MUTATIONS (PUTATIVE DRIVER)	0	0
PTGER3	All	6	0.0402685	AMPLIFICATION	0	0	DEEP DELETION	0	0	mRNA HIGH	6	0.0402685	mRNA LOW	0	0	FUSION	0	0	MISSENSE, INFRAME, TRUNCATING MUTATIONS (PUTATIVE DRIVER)	0	0
PTGER4	All	7	0.0469799	AMPLIFICATION	0	0	DEEP DELETION	0	0	mRNA HIGH	4	0.0268456	mRNA LOW	3	0.0201342	FUSION	0	0	MISSENSE, INFRAME, TRUNCATING MUTATIONS (PUTATIVE DRIVER)	0	0
RAI1	All	9	0.0604027	AMPLIFICATION	0	0	DEEP DELETION	0	0	mRNA HIGH	0	0	mRNA LOW	9	0.0604027	FUSION	0	0	MISSENSE, INFRAME, TRUNCATING MUTATIONS (PUTATIVE DRIVER)	0	0
RBM4	All	7	0.0469799	AMPLIFICATION	0	0	DEEP DELETION	0	0	mRNA HIGH	0	0	mRNA LOW	7	0.0469799	FUSION	0	0	MISSENSE, INFRAME, TRUNCATING MUTATIONS (PUTATIVE DRIVER)	0	0
RBM4B	All	7	0.0469799	AMPLIFICATION	0	0	DEEP DELETION	0	0	mRNA HIGH	6	0.0402685	mRNA LOW	1	0.00671141	FUSION	0	0	MISSENSE, INFRAME, TRUNCATING MUTATIONS (PUTATIVE DRIVER)	0	0
RELB	All	7	0.0469799	AMPLIFICATION	0	0	DEEP DELETION	0	0	mRNA HIGH	3	0.0201342	mRNA LOW	4	0.0268456	FUSION	0	0	MISSENSE, INFRAME, TRUNCATING MUTATIONS (PUTATIVE DRIVER)	0	0
ROCK2	All	11	0.0738255	AMPLIFICATION	0	0	DEEP DELETION	0	0	mRNA HIGH	2	0.0134228	mRNA LOW	9	0.0604027	FUSION	0	0	MISSENSE, INFRAME, TRUNCATING MUTATIONS (PUTATIVE DRIVER)	0	0
RORA	All	9	0.0604027	AMPLIFICATION	0	0	DEEP DELETION	0	0	mRNA HIGH	4	0.0268456	mRNA LOW	5	0.033557	FUSION	0	0	MISSENSE, INFRAME, TRUNCATING MUTATIONS (PUTATIVE DRIVER)	0	0
RORB	All	6	0.0402685	AMPLIFICATION	0	0	DEEP DELETION	0	0	mRNA HIGH	6	0.0402685	mRNA LOW	0	0	FUSION	0	0	MISSENSE, INFRAME, TRUNCATING MUTATIONS (PUTATIVE DRIVER)	0	0
RORC	All	6	0.0402685	AMPLIFICATION	0	0	DEEP DELETION	0	0	mRNA HIGH	2	0.0134228	mRNA LOW	4	0.0268456	FUSION	0	0	MISSENSE, INFRAME, TRUNCATING MUTATIONS (PUTATIVE DRIVER)	0	0
SETX	All	2	0.0134228	AMPLIFICATION	0	0	DEEP DELETION	1	0.00671141	mRNA HIGH	0	0	mRNA LOW	1	0.00671141	FUSION	0	0	MISSENSE, INFRAME, TRUNCATING MUTATIONS (PUTATIVE DRIVER)	0	0
SFPQ	All	6	0.0402685	AMPLIFICATION	0	0	DEEP DELETION	0	0	mRNA HIGH	2	0.0134228	mRNA LOW	4	0.0268456	FUSION	0	0	MISSENSE, INFRAME, TRUNCATING MUTATIONS (PUTATIVE DRIVER)	0	0
SIAH2	All	5	0.033557	AMPLIFICATION	0	0	DEEP DELETION	0	0	mRNA HIGH	3	0.0201342	mRNA LOW	2	0.0134228	FUSION	0	0	MISSENSE, INFRAME, TRUNCATING MUTATIONS (PUTATIVE DRIVER)	0	0
SIK1	All	6	0.0402685	AMPLIFICATION	0	0	DEEP DELETION	0	0	mRNA HIGH	2	0.0134228	mRNA LOW	4	0.0268456	FUSION	0	0	MISSENSE, INFRAME, TRUNCATING MUTATIONS (PUTATIVE DRIVER)	0	0
SIN3A	All	5	0.033557	AMPLIFICATION	0	0	DEEP DELETION	0	0	mRNA HIGH	1	0.00671141	mRNA LOW	4	0.0268456	FUSION	0	0	MISSENSE, INFRAME, TRUNCATING MUTATIONS (PUTATIVE DRIVER)	0	0
SIRT1	All	6	0.0402685	AMPLIFICATION	0	0	DEEP DELETION	0	0	mRNA HIGH	2	0.0134228	mRNA LOW	4	0.0268456	FUSION	0	0	MISSENSE, INFRAME, TRUNCATING MUTATIONS (PUTATIVE DRIVER)	0	0
SIX3	All	9	0.0604027	AMPLIFICATION	1	0.00671141	DEEP DELETION	0	0	mRNA HIGH	8	0.0536913	mRNA LOW	0	0	FUSION	0	0	MISSENSE, INFRAME, TRUNCATING MUTATIONS (PUTATIVE DRIVER)	0	0
SLC6A4	All	7	0.0469799	AMPLIFICATION	0	0	DEEP DELETION	1	0.00671141	mRNA HIGH	6	0.0402685	mRNA LOW	0	0	FUSION	0	0	MISSENSE, INFRAME, TRUNCATING MUTATIONS (PUTATIVE DRIVER)	0	0
SOX14	All	2	0.0134228	AMPLIFICATION	0	0	DEEP DELETION	0	0	mRNA HIGH	2	0.0134228	mRNA LOW	0	0	FUSION	0	0	MISSENSE, INFRAME, TRUNCATING MUTATIONS (PUTATIVE DRIVER)	0	0
SPSB4	All	7	0.0469799	AMPLIFICATION	0	0	DEEP DELETION	0	0	mRNA HIGH	0	0	mRNA LOW	7	0.0469799	FUSION	0	0	MISSENSE, INFRAME, TRUNCATING MUTATIONS (PUTATIVE DRIVER)	0	0
SRRD	All	5	0.033557	AMPLIFICATION	0	0	DEEP DELETION	0	0	mRNA HIGH	3	0.0201342	mRNA LOW	2	0.0134228	FUSION	0	0	MISSENSE, INFRAME, TRUNCATING MUTATIONS (PUTATIVE DRIVER)	0	0
SUV39H1	All	8	0.0536913	AMPLIFICATION	0	0	DEEP DELETION	1	0.00671141	mRNA HIGH	1	0.00671141	mRNA LOW	6	0.0402685	FUSION	0	0	MISSENSE, INFRAME, TRUNCATING MUTATIONS (PUTATIVE DRIVER)	0	0
SUV39H2	All	10	0.0671141	AMPLIFICATION	0	0	DEEP DELETION	1	0.00671141	mRNA HIGH	2	0.0134228	mRNA LOW	7	0.0469799	FUSION	0	0	MISSENSE, INFRAME, TRUNCATING MUTATIONS (PUTATIVE DRIVER)	0	0
TARDBP	All	6	0.0402685	AMPLIFICATION	0	0	DEEP DELETION	1	0.00671141	mRNA HIGH	1	0.00671141	mRNA LOW	4	0.0268456	FUSION	0	0	MISSENSE, INFRAME, TRUNCATING MUTATIONS (PUTATIVE DRIVER)	0	0
THRAP3	All	4	0.0268456	AMPLIFICATION	0	0	DEEP DELETION	0	0	mRNA HIGH	1	0.00671141	mRNA LOW	3	0.0201342	FUSION	0	0	MISSENSE, INFRAME, TRUNCATING MUTATIONS (PUTATIVE DRIVER)	0	0
TIMELESS	All	6	0.0402685	AMPLIFICATION	0	0	DEEP DELETION	0	0	mRNA HIGH	1	0.00671141	mRNA LOW	5	0.033557	FUSION	0	0	MISSENSE, INFRAME, TRUNCATING MUTATIONS (PUTATIVE DRIVER)	0	0
TNFRSF11A	All	10	0.0671141	AMPLIFICATION	0	0	DEEP DELETION	3	0.0201342	mRNA HIGH	7	0.0469799	mRNA LOW	0	0	FUSION	0	0	MISSENSE, INFRAME, TRUNCATING MUTATIONS (PUTATIVE DRIVER)	0	0
TOP1	All	6	0.0402685	AMPLIFICATION	0	0	DEEP DELETION	0	0	mRNA HIGH	1	0.00671141	mRNA LOW	4	0.0268456	FUSION	0	0	MISSENSE, INFRAME, TRUNCATING MUTATIONS (PUTATIVE DRIVER)	1	0.00671141
TOP2A	All	6	0.0402685	AMPLIFICATION	0	0	DEEP DELETION	0	0	mRNA HIGH	1	0.00671141	mRNA LOW	5	0.033557	FUSION	0	0	MISSENSE, INFRAME, TRUNCATING MUTATIONS (PUTATIVE DRIVER)	0	0
TP53	All	11	0.0738255	AMPLIFICATION	0	0	DEEP DELETION	0	0	mRNA HIGH	5	0.033557	mRNA LOW	4	0.0268456	FUSION	1	0.00671141	MISSENSE, INFRAME, TRUNCATING MUTATIONS (PUTATIVE DRIVER)	1	0.00671141
UBE3A	All	5	0.033557	AMPLIFICATION	0	0	DEEP DELETION	0	0	mRNA HIGH	2	0.0134228	mRNA LOW	3	0.0201342	FUSION	0	0	MISSENSE, INFRAME, TRUNCATING MUTATIONS (PUTATIVE DRIVER)	0	0
USP2	All	13	0.0872483	AMPLIFICATION	0	0	DEEP DELETION	4	0.0268456	mRNA HIGH	7	0.0469799	mRNA LOW	2	0.0134228	FUSION	0	0	MISSENSE, INFRAME, TRUNCATING MUTATIONS (PUTATIVE DRIVER)	0	0
USP7	All	5	0.033557	AMPLIFICATION	0	0	DEEP DELETION	0	0	mRNA HIGH	3	0.0201342	mRNA LOW	2	0.0134228	FUSION	0	0	MISSENSE, INFRAME, TRUNCATING MUTATIONS (PUTATIVE DRIVER)	0	0
USP9X	All	6	0.0402685	AMPLIFICATION	0	0	DEEP DELETION	1	0.00671141	mRNA HIGH	1	0.00671141	mRNA LOW	4	0.0268456	FUSION	0	0	MISSENSE, INFRAME, TRUNCATING MUTATIONS (PUTATIVE DRIVER)	0	0
UTS2	All	6	0.0402685	AMPLIFICATION	0	0	DEEP DELETION	2	0.0134228	mRNA HIGH	4	0.0268456	mRNA LOW	0	0	FUSION	0	0	MISSENSE, INFRAME, TRUNCATING MUTATIONS (PUTATIVE DRIVER)	0	0
UTS2R	All	12	0.0805369	AMPLIFICATION	0	0	DEEP DELETION	0	0	mRNA HIGH	3	0.0201342	mRNA LOW	9	0.0604027	FUSION	0	0	MISSENSE, INFRAME, TRUNCATING MUTATIONS (PUTATIVE DRIVER)	0	0
ZFHX3	All	10	0.0671141	AMPLIFICATION	0	0	DEEP DELETION	0	0	mRNA HIGH	9	0.0604027	mRNA LOW	1	0.00671141	FUSION	0	0	MISSENSE, INFRAME, TRUNCATING MUTATIONS (PUTATIVE DRIVER)	0	0
ZPBP2	All	4	0.0268456	AMPLIFICATION	0	0	DEEP DELETION	0	0	mRNA HIGH	4	0.0268456	mRNA LOW	0	0	FUSION	0	0	MISSENSE, INFRAME, TRUNCATING MUTATIONS (PUTATIVE DRIVER)	0	0

## Sheet: ST_10
Supplementary Table 10. Frequency of alterations belonging to 255 individuals with TCGA-SARC
GENE	TYPE	TOTAL	f	TYPE	TOTAL	f	TYPE	TOTAL	f	TYPE	TOTAL	f	TYPE	TOTAL	f	TYPE	TOTAL	f	TYPE	TOTAL	f
AANAT	All	13	0.0509804	AMPLIFICATION	8	0.0313725	DEEP DELETION	0	0	mRNA HIGH	5	0.0196078	mRNA LOW	0	0	FUSION	0	0	MISSENSE, INFRAME, TRUNCATING MUTATIONS (PUTATIVE DRIVER)	0	0
ADA	All	7	0.027451	AMPLIFICATION	1	0.00392157	DEEP DELETION	0	0	mRNA HIGH	5	0.0196078	mRNA LOW	1	0.00392157	FUSION	0	0	MISSENSE, INFRAME, TRUNCATING MUTATIONS (PUTATIVE DRIVER)	0	0
ADCY1	All	14	0.054902	AMPLIFICATION	3	0.0117647	DEEP DELETION	1	0.00392157	mRNA HIGH	1	0.00392157	mRNA LOW	9	0.0352941	FUSION	0	0	MISSENSE, INFRAME, TRUNCATING MUTATIONS (PUTATIVE DRIVER)	0	0
ADORA1	All	10	0.0392157	AMPLIFICATION	3	0.0117647	DEEP DELETION	1	0.00392157	mRNA HIGH	3	0.0117647	mRNA LOW	3	0.0117647	FUSION	0	0	MISSENSE, INFRAME, TRUNCATING MUTATIONS (PUTATIVE DRIVER)	0	0
ADORA2A	All	14	0.054902	AMPLIFICATION	4	0.0156863	DEEP DELETION	1	0.00392157	mRNA HIGH	6	0.0235294	mRNA LOW	3	0.0117647	FUSION	0	0	MISSENSE, INFRAME, TRUNCATING MUTATIONS (PUTATIVE DRIVER)	0	0
ADRB1	All	13	0.0509804	AMPLIFICATION	0	0	DEEP DELETION	1	0.00392157	mRNA HIGH	12	0.0470588	mRNA LOW	0	0	FUSION	0	0	MISSENSE, INFRAME, TRUNCATING MUTATIONS (PUTATIVE DRIVER)	0	0
AHCY	All	22	0.0862745	AMPLIFICATION	5	0.0196078	DEEP DELETION	0	0	mRNA HIGH	12	0.0470588	mRNA LOW	4	0.0156863	FUSION	1	0.00392157	MISSENSE, INFRAME, TRUNCATING MUTATIONS (PUTATIVE DRIVER)	0	0
AHR	All	25	0.0980392	AMPLIFICATION	6	0.0235294	DEEP DELETION	0	0	mRNA HIGH	7	0.027451	mRNA LOW	12	0.0470588	FUSION	0	0	MISSENSE, INFRAME, TRUNCATING MUTATIONS (PUTATIVE DRIVER)	0	0
ALB	All	20	0.0784314	AMPLIFICATION	3	0.0117647	DEEP DELETION	0	0	mRNA HIGH	17	0.0666667	mRNA LOW	0	0	FUSION	0	0	MISSENSE, INFRAME, TRUNCATING MUTATIONS (PUTATIVE DRIVER)	0	0
ANKFN1	All	10	0.0392157	AMPLIFICATION	2	0.00784314	DEEP DELETION	0	0	mRNA HIGH	7	0.027451	mRNA LOW	0	0	FUSION	1	0.00392157	MISSENSE, INFRAME, TRUNCATING MUTATIONS (PUTATIVE DRIVER)	0	0
ARNTL	All	16	0.0627451	AMPLIFICATION	3	0.0117647	DEEP DELETION	0	0	mRNA HIGH	4	0.0156863	mRNA LOW	8	0.0313725	FUSION	1	0.00392157	MISSENSE, INFRAME, TRUNCATING MUTATIONS (PUTATIVE DRIVER)	0	0
ARNTL2	All	17	0.0666667	AMPLIFICATION	4	0.0156863	DEEP DELETION	2	0.00784314	mRNA HIGH	3	0.0117647	mRNA LOW	8	0.0313725	FUSION	0	0	MISSENSE, INFRAME, TRUNCATING MUTATIONS (PUTATIVE DRIVER)	0	0
ASS1	All	17	0.0666667	AMPLIFICATION	4	0.0156863	DEEP DELETION	1	0.00392157	mRNA HIGH	1	0.00392157	mRNA LOW	11	0.0431373	FUSION	0	0	MISSENSE, INFRAME, TRUNCATING MUTATIONS (PUTATIVE DRIVER)	0	0
ATF4	All	13	0.0509804	AMPLIFICATION	2	0.00784314	DEEP DELETION	0	0	mRNA HIGH	5	0.0196078	mRNA LOW	6	0.0235294	FUSION	0	0	MISSENSE, INFRAME, TRUNCATING MUTATIONS (PUTATIVE DRIVER)	0	0
ATG7	All	20	0.0784314	AMPLIFICATION	5	0.0196078	DEEP DELETION	0	0	mRNA HIGH	11	0.0431373	mRNA LOW	4	0.0156863	FUSION	0	0	MISSENSE, INFRAME, TRUNCATING MUTATIONS (PUTATIVE DRIVER)	0	0
ATOH7	All	10	0.0392157	AMPLIFICATION	0	0	DEEP DELETION	3	0.0117647	mRNA HIGH	7	0.027451	mRNA LOW	0	0	FUSION	0	0	MISSENSE, INFRAME, TRUNCATING MUTATIONS (PUTATIVE DRIVER)	0	0
BHLHE40	All	15	0.0588235	AMPLIFICATION	6	0.0235294	DEEP DELETION	0	0	mRNA HIGH	4	0.0156863	mRNA LOW	5	0.0196078	FUSION	0	0	MISSENSE, INFRAME, TRUNCATING MUTATIONS (PUTATIVE DRIVER)	0	0
BHLHE41	All	22	0.0862745	AMPLIFICATION	6	0.0235294	DEEP DELETION	3	0.0117647	mRNA HIGH	3	0.0117647	mRNA LOW	10	0.0392157	FUSION	0	0	MISSENSE, INFRAME, TRUNCATING MUTATIONS (PUTATIVE DRIVER)	0	0
BTBD9	All	13	0.0509804	AMPLIFICATION	4	0.0156863	DEEP DELETION	0	0	mRNA HIGH	7	0.027451	mRNA LOW	1	0.00392157	FUSION	1	0.00392157	MISSENSE, INFRAME, TRUNCATING MUTATIONS (PUTATIVE DRIVER)	0	0
BTRC	All	10	0.0392157	AMPLIFICATION	0	0	DEEP DELETION	0	0	mRNA HIGH	6	0.0235294	mRNA LOW	4	0.0156863	FUSION	0	0	MISSENSE, INFRAME, TRUNCATING MUTATIONS (PUTATIVE DRIVER)	0	0
CARTPT	All	4	0.0156863	AMPLIFICATION	0	0	DEEP DELETION	0	0	mRNA HIGH	4	0.0156863	mRNA LOW	0	0	FUSION	0	0	MISSENSE, INFRAME, TRUNCATING MUTATIONS (PUTATIVE DRIVER)	0	0
CASP1	All	16	0.0627451	AMPLIFICATION	4	0.0156863	DEEP DELETION	3	0.0117647	mRNA HIGH	0	0	mRNA LOW	9	0.0352941	FUSION	0	0	MISSENSE, INFRAME, TRUNCATING MUTATIONS (PUTATIVE DRIVER)	0	0
CAVIN3	All	16	0.0627451	AMPLIFICATION	2	0.00784314	DEEP DELETION	0	0	mRNA HIGH	3	0.0117647	mRNA LOW	11	0.0431373	FUSION	0	0	MISSENSE, INFRAME, TRUNCATING MUTATIONS (PUTATIVE DRIVER)	0	0
CCAR2	All	16	0.0627451	AMPLIFICATION	0	0	DEEP DELETION	1	0.00392157	mRNA HIGH	5	0.0196078	mRNA LOW	10	0.0392157	FUSION	0	0	MISSENSE, INFRAME, TRUNCATING MUTATIONS (PUTATIVE DRIVER)	0	0
CDK1	All	14	0.054902	AMPLIFICATION	0	0	DEEP DELETION	2	0.00784314	mRNA HIGH	0	0	mRNA LOW	12	0.0470588	FUSION	0	0	MISSENSE, INFRAME, TRUNCATING MUTATIONS (PUTATIVE DRIVER)	0	0
CHRNB2	All	20	0.0784314	AMPLIFICATION	9	0.0352941	DEEP DELETION	0	0	mRNA HIGH	11	0.0431373	mRNA LOW	0	0	FUSION	0	0	MISSENSE, INFRAME, TRUNCATING MUTATIONS (PUTATIVE DRIVER)	0	0
CIART	All	20	0.0784314	AMPLIFICATION	11	0.0431373	DEEP DELETION	1	0.00392157	mRNA HIGH	1	0.00392157	mRNA LOW	7	0.027451	FUSION	0	0	MISSENSE, INFRAME, TRUNCATING MUTATIONS (PUTATIVE DRIVER)	0	0
CIPC	All	19	0.0745098	AMPLIFICATION	3	0.0117647	DEEP DELETION	2	0.00784314	mRNA HIGH	13	0.0509804	mRNA LOW	1	0.00392157	FUSION	0	0	MISSENSE, INFRAME, TRUNCATING MUTATIONS (PUTATIVE DRIVER)	0	0
CLOCK	All	14	0.054902	AMPLIFICATION	5	0.0196078	DEEP DELETION	0	0	mRNA HIGH	1	0.00392157	mRNA LOW	8	0.0313725	FUSION	0	0	MISSENSE, INFRAME, TRUNCATING MUTATIONS (PUTATIVE DRIVER)	0	0
CORT	All	15	0.0588235	AMPLIFICATION	5	0.0196078	DEEP DELETION	0	0	mRNA HIGH	5	0.0196078	mRNA LOW	5	0.0196078	FUSION	0	0	MISSENSE, INFRAME, TRUNCATING MUTATIONS (PUTATIVE DRIVER)	0	0
CREB1	All	9	0.0352941	AMPLIFICATION	1	0.00392157	DEEP DELETION	2	0.00784314	mRNA HIGH	1	0.00392157	mRNA LOW	5	0.0196078	FUSION	0	0	MISSENSE, INFRAME, TRUNCATING MUTATIONS (PUTATIVE DRIVER)	0	0
CREM	All	17	0.0666667	AMPLIFICATION	2	0.00784314	DEEP DELETION	0	0	mRNA HIGH	13	0.0509804	mRNA LOW	2	0.00784314	FUSION	0	0	MISSENSE, INFRAME, TRUNCATING MUTATIONS (PUTATIVE DRIVER)	0	0
CRTC1	All	13	0.0509804	AMPLIFICATION	2	0.00784314	DEEP DELETION	1	0.00392157	mRNA HIGH	6	0.0235294	mRNA LOW	4	0.0156863	FUSION	0	0	MISSENSE, INFRAME, TRUNCATING MUTATIONS (PUTATIVE DRIVER)	0	0
CRY1	All	17	0.0666667	AMPLIFICATION	4	0.0156863	DEEP DELETION	1	0.00392157	mRNA HIGH	4	0.0156863	mRNA LOW	8	0.0313725	FUSION	0	0	MISSENSE, INFRAME, TRUNCATING MUTATIONS (PUTATIVE DRIVER)	0	0
CRY2	All	14	0.054902	AMPLIFICATION	2	0.00784314	DEEP DELETION	1	0.00392157	mRNA HIGH	5	0.0196078	mRNA LOW	6	0.0235294	FUSION	0	0	MISSENSE, INFRAME, TRUNCATING MUTATIONS (PUTATIVE DRIVER)	0	0
CSF2	All	14	0.054902	AMPLIFICATION	3	0.0117647	DEEP DELETION	1	0.00392157	mRNA HIGH	10	0.0392157	mRNA LOW	0	0	FUSION	0	0	MISSENSE, INFRAME, TRUNCATING MUTATIONS (PUTATIVE DRIVER)	0	0
CSNK1D	All	24	0.0941176	AMPLIFICATION	7	0.027451	DEEP DELETION	3	0.0117647	mRNA HIGH	5	0.0196078	mRNA LOW	8	0.0313725	FUSION	1	0.00392157	MISSENSE, INFRAME, TRUNCATING MUTATIONS (PUTATIVE DRIVER)	0	0
CSNK1E	All	14	0.054902	AMPLIFICATION	2	0.00784314	DEEP DELETION	0	0	mRNA HIGH	5	0.0196078	mRNA LOW	7	0.027451	FUSION	0	0	MISSENSE, INFRAME, TRUNCATING MUTATIONS (PUTATIVE DRIVER)	0	0
CYP7B1	All	23	0.0901961	AMPLIFICATION	6	0.0235294	DEEP DELETION	0	0	mRNA HIGH	3	0.0117647	mRNA LOW	13	0.0509804	FUSION	1	0.00392157	MISSENSE, INFRAME, TRUNCATING MUTATIONS (PUTATIVE DRIVER)	0	0
DBP	All	12	0.0470588	AMPLIFICATION	0	0	DEEP DELETION	1	0.00392157	mRNA HIGH	5	0.0196078	mRNA LOW	6	0.0235294	FUSION	0	0	MISSENSE, INFRAME, TRUNCATING MUTATIONS (PUTATIVE DRIVER)	0	0
DDB1	All	11	0.0431373	AMPLIFICATION	0	0	DEEP DELETION	1	0.00392157	mRNA HIGH	6	0.0235294	mRNA LOW	3	0.0117647	FUSION	1	0.00392157	MISSENSE, INFRAME, TRUNCATING MUTATIONS (PUTATIVE DRIVER)	0	0
DDX5	All	18	0.0705882	AMPLIFICATION	2	0.00784314	DEEP DELETION	1	0.00392157	mRNA HIGH	6	0.0235294	mRNA LOW	9	0.0352941	FUSION	0	0	MISSENSE, INFRAME, TRUNCATING MUTATIONS (PUTATIVE DRIVER)	0	0
DHX9	All	18	0.0705882	AMPLIFICATION	4	0.0156863	DEEP DELETION	1	0.00392157	mRNA HIGH	4	0.0156863	mRNA LOW	9	0.0352941	FUSION	0	0	MISSENSE, INFRAME, TRUNCATING MUTATIONS (PUTATIVE DRIVER)	0	0
DPYD	All	20	0.0784314	AMPLIFICATION	3	0.0117647	DEEP DELETION	3	0.0117647	mRNA HIGH	1	0.00392157	mRNA LOW	13	0.0509804	FUSION	0	0	MISSENSE, INFRAME, TRUNCATING MUTATIONS (PUTATIVE DRIVER)	0	0
DRD1	All	13	0.0509804	AMPLIFICATION	6	0.0235294	DEEP DELETION	1	0.00392157	mRNA HIGH	6	0.0235294	mRNA LOW	0	0	FUSION	0	0	MISSENSE, INFRAME, TRUNCATING MUTATIONS (PUTATIVE DRIVER)	0	0
DRD2	All	13	0.0509804	AMPLIFICATION	0	0	DEEP DELETION	5	0.0196078	mRNA HIGH	8	0.0313725	mRNA LOW	0	0	FUSION	0	0	MISSENSE, INFRAME, TRUNCATING MUTATIONS (PUTATIVE DRIVER)	0	0
DRD3	All	7	0.027451	AMPLIFICATION	5	0.0196078	DEEP DELETION	1	0.00392157	mRNA HIGH	1	0.00392157	mRNA LOW	0	0	FUSION	0	0	MISSENSE, INFRAME, TRUNCATING MUTATIONS (PUTATIVE DRIVER)	0	0
DRD4	All	17	0.0666667	AMPLIFICATION	0	0	DEEP DELETION	2	0.00784314	mRNA HIGH	10	0.0392157	mRNA LOW	5	0.0196078	FUSION	0	0	MISSENSE, INFRAME, TRUNCATING MUTATIONS (PUTATIVE DRIVER)	0	0
DYRK1A	All	16	0.0627451	AMPLIFICATION	3	0.0117647	DEEP DELETION	0	0	mRNA HIGH	4	0.0156863	mRNA LOW	9	0.0352941	FUSION	0	0	MISSENSE, INFRAME, TRUNCATING MUTATIONS (PUTATIVE DRIVER)	0	0
EGR1	All	22	0.0862745	AMPLIFICATION	5	0.0196078	DEEP DELETION	1	0.00392157	mRNA HIGH	10	0.0392157	mRNA LOW	6	0.0235294	FUSION	0	0	MISSENSE, INFRAME, TRUNCATING MUTATIONS (PUTATIVE DRIVER)	0	0
EP300	All	17	0.0666667	AMPLIFICATION	2	0.00784314	DEEP DELETION	0	0	mRNA HIGH	5	0.0196078	mRNA LOW	10	0.0392157	FUSION	0	0	MISSENSE, INFRAME, TRUNCATING MUTATIONS (PUTATIVE DRIVER)	0	0
EZH2	All	20	0.0784314	AMPLIFICATION	5	0.0196078	DEEP DELETION	6	0.0235294	mRNA HIGH	2	0.00784314	mRNA LOW	7	0.027451	FUSION	0	0	MISSENSE, INFRAME, TRUNCATING MUTATIONS (PUTATIVE DRIVER)	0	0
FBXL3	All	16	0.0627451	AMPLIFICATION	1	0.00392157	DEEP DELETION	2	0.00784314	mRNA HIGH	5	0.0196078	mRNA LOW	8	0.0313725	FUSION	0	0	MISSENSE, INFRAME, TRUNCATING MUTATIONS (PUTATIVE DRIVER)	0	0
FBXL6	All	21	0.0823529	AMPLIFICATION	6	0.0235294	DEEP DELETION	1	0.00392157	mRNA HIGH	8	0.0313725	mRNA LOW	6	0.0235294	FUSION	0	0	MISSENSE, INFRAME, TRUNCATING MUTATIONS (PUTATIVE DRIVER)	0	0
FBXL8	All	16	0.0627451	AMPLIFICATION	1	0.00392157	DEEP DELETION	0	0	mRNA HIGH	7	0.027451	mRNA LOW	8	0.0313725	FUSION	0	0	MISSENSE, INFRAME, TRUNCATING MUTATIONS (PUTATIVE DRIVER)	0	0
FBXL12	All	25	0.0980392	AMPLIFICATION	16	0.0627451	DEEP DELETION	0	0	mRNA HIGH	6	0.0235294	mRNA LOW	3	0.0117647	FUSION	0	0	MISSENSE, INFRAME, TRUNCATING MUTATIONS (PUTATIVE DRIVER)	0	0
FBXL17	All	19	0.0745098	AMPLIFICATION	3	0.0117647	DEEP DELETION	2	0.00784314	mRNA HIGH	4	0.0156863	mRNA LOW	10	0.0392157	FUSION	0	0	MISSENSE, INFRAME, TRUNCATING MUTATIONS (PUTATIVE DRIVER)	0	0
FBXL21P	All	9	0.0352941	AMPLIFICATION	5	0.0196078	DEEP DELETION	1	0.00392157	mRNA HIGH	3	0.0117647	mRNA LOW	0	0	FUSION	0	0	MISSENSE, INFRAME, TRUNCATING MUTATIONS (PUTATIVE DRIVER)	0	0
FBXL22	All	8	0.0313725	AMPLIFICATION	3	0.0117647	DEEP DELETION	0	0	mRNA HIGH	3	0.0117647	mRNA LOW	2	0.00784314	FUSION	0	0	MISSENSE, INFRAME, TRUNCATING MUTATIONS (PUTATIVE DRIVER)	0	0
FBXW7	All	20	0.0784314	AMPLIFICATION	7	0.027451	DEEP DELETION	1	0.00392157	mRNA HIGH	6	0.0235294	mRNA LOW	5	0.0196078	FUSION	1	0.00392157	MISSENSE, INFRAME, TRUNCATING MUTATIONS (PUTATIVE DRIVER)	0	0
FBXW11	All	17	0.0666667	AMPLIFICATION	5	0.0196078	DEEP DELETION	0	0	mRNA HIGH	5	0.0196078	mRNA LOW	6	0.0235294	FUSION	1	0.00392157	MISSENSE, INFRAME, TRUNCATING MUTATIONS (PUTATIVE DRIVER)	0	0
GABRB3	All	12	0.0470588	AMPLIFICATION	4	0.0156863	DEEP DELETION	1	0.00392157	mRNA HIGH	6	0.0235294	mRNA LOW	0	0	FUSION	1	0.00392157	MISSENSE, INFRAME, TRUNCATING MUTATIONS (PUTATIVE DRIVER)	0	0
GFPT1	All	12	0.0470588	AMPLIFICATION	2	0.00784314	DEEP DELETION	0	0	mRNA HIGH	6	0.0235294	mRNA LOW	4	0.0156863	FUSION	0	0	MISSENSE, INFRAME, TRUNCATING MUTATIONS (PUTATIVE DRIVER)	0	0
GHRH	All	5	0.0196078	AMPLIFICATION	2	0.00784314	DEEP DELETION	1	0.00392157	mRNA HIGH	2	0.00784314	mRNA LOW	0	0	FUSION	0	0	MISSENSE, INFRAME, TRUNCATING MUTATIONS (PUTATIVE DRIVER)	0	0
GHRHR	All	246	0.964706	AMPLIFICATION	7	0.027451	DEEP DELETION	0	0	mRNA HIGH	1	0.00392157	mRNA LOW	238	0.933333	FUSION	0	0	MISSENSE, INFRAME, TRUNCATING MUTATIONS (PUTATIVE DRIVER)	0	0
GHRL	All	17	0.0666667	AMPLIFICATION	6	0.0235294	DEEP DELETION	1	0.00392157	mRNA HIGH	10	0.0392157	mRNA LOW	0	0	FUSION	0	0	MISSENSE, INFRAME, TRUNCATING MUTATIONS (PUTATIVE DRIVER)	0	0
GPR157	All	20	0.0784314	AMPLIFICATION	5	0.0196078	DEEP DELETION	0	0	mRNA HIGH	3	0.0117647	mRNA LOW	12	0.0470588	FUSION	0	0	MISSENSE, INFRAME, TRUNCATING MUTATIONS (PUTATIVE DRIVER)	0	0
GPR176	All	14	0.054902	AMPLIFICATION	1	0.00392157	DEEP DELETION	1	0.00392157	mRNA HIGH	1	0.00392157	mRNA LOW	11	0.0431373	FUSION	0	0	MISSENSE, INFRAME, TRUNCATING MUTATIONS (PUTATIVE DRIVER)	0	0
GSK3B	All	10	0.0392157	AMPLIFICATION	3	0.0117647	DEEP DELETION	1	0.00392157	mRNA HIGH	1	0.00392157	mRNA LOW	5	0.0196078	FUSION	0	0	MISSENSE, INFRAME, TRUNCATING MUTATIONS (PUTATIVE DRIVER)	0	0
HCRTR2	All	8	0.0313725	AMPLIFICATION	2	0.00784314	DEEP DELETION	0	0	mRNA HIGH	6	0.0235294	mRNA LOW	0	0	FUSION	0	0	MISSENSE, INFRAME, TRUNCATING MUTATIONS (PUTATIVE DRIVER)	0	0
HDAC1	All	17	0.0666667	AMPLIFICATION	5	0.0196078	DEEP DELETION	1	0.00392157	mRNA HIGH	4	0.0156863	mRNA LOW	7	0.027451	FUSION	0	0	MISSENSE, INFRAME, TRUNCATING MUTATIONS (PUTATIVE DRIVER)	0	0
HDAC2	All	16	0.0627451	AMPLIFICATION	6	0.0235294	DEEP DELETION	0	0	mRNA HIGH	10	0.0392157	mRNA LOW	0	0	FUSION	0	0	MISSENSE, INFRAME, TRUNCATING MUTATIONS (PUTATIVE DRIVER)	0	0
HDAC3	All	19	0.0745098	AMPLIFICATION	4	0.0156863	DEEP DELETION	1	0.00392157	mRNA HIGH	6	0.0235294	mRNA LOW	8	0.0313725	FUSION	0	0	MISSENSE, INFRAME, TRUNCATING MUTATIONS (PUTATIVE DRIVER)	0	0
HNF1B	All	8	0.0313725	AMPLIFICATION	1	0.00392157	DEEP DELETION	1	0.00392157	mRNA HIGH	5	0.0196078	mRNA LOW	0	0	FUSION	1	0.00392157	MISSENSE, INFRAME, TRUNCATING MUTATIONS (PUTATIVE DRIVER)	0	0
HNF4A	All	9	0.0352941	AMPLIFICATION	1	0.00392157	DEEP DELETION	0	0	mRNA HIGH	7	0.027451	mRNA LOW	0	0	FUSION	1	0.00392157	MISSENSE, INFRAME, TRUNCATING MUTATIONS (PUTATIVE DRIVER)	0	0
HNRNPD	All	18	0.0705882	AMPLIFICATION	3	0.0117647	DEEP DELETION	1	0.00392157	mRNA HIGH	6	0.0235294	mRNA LOW	8	0.0313725	FUSION	0	0	MISSENSE, INFRAME, TRUNCATING MUTATIONS (PUTATIVE DRIVER)	0	0
HNRNPU	All	21	0.0823529	AMPLIFICATION	3	0.0117647	DEEP DELETION	3	0.0117647	mRNA HIGH	8	0.0313725	mRNA LOW	7	0.027451	FUSION	0	0	MISSENSE, INFRAME, TRUNCATING MUTATIONS (PUTATIVE DRIVER)	0	0
HS3ST2	All	14	0.054902	AMPLIFICATION	1	0.00392157	DEEP DELETION	0	0	mRNA HIGH	9	0.0352941	mRNA LOW	4	0.0156863	FUSION	0	0	MISSENSE, INFRAME, TRUNCATING MUTATIONS (PUTATIVE DRIVER)	0	0
HTR7	All	17	0.0666667	AMPLIFICATION	0	0	DEEP DELETION	3	0.0117647	mRNA HIGH	11	0.0431373	mRNA LOW	3	0.0117647	FUSION	0	0	MISSENSE, INFRAME, TRUNCATING MUTATIONS (PUTATIVE DRIVER)	0	0
HUWE1	All	18	0.0705882	AMPLIFICATION	7	0.027451	DEEP DELETION	1	0.00392157	mRNA HIGH	7	0.027451	mRNA LOW	3	0.0117647	FUSION	0	0	MISSENSE, INFRAME, TRUNCATING MUTATIONS (PUTATIVE DRIVER)	0	0
ID1	All	14	0.054902	AMPLIFICATION	4	0.0156863	DEEP DELETION	0	0	mRNA HIGH	7	0.027451	mRNA LOW	3	0.0117647	FUSION	0	0	MISSENSE, INFRAME, TRUNCATING MUTATIONS (PUTATIVE DRIVER)	0	0
ID2	All	16	0.0627451	AMPLIFICATION	1	0.00392157	DEEP DELETION	0	0	mRNA HIGH	7	0.027451	mRNA LOW	8	0.0313725	FUSION	0	0	MISSENSE, INFRAME, TRUNCATING MUTATIONS (PUTATIVE DRIVER)	0	0
ID3	All	14	0.054902	AMPLIFICATION	4	0.0156863	DEEP DELETION	1	0.00392157	mRNA HIGH	3	0.0117647	mRNA LOW	5	0.0196078	FUSION	0	0	MISSENSE, INFRAME, TRUNCATING MUTATIONS (PUTATIVE DRIVER)	1	0.00392157
ID4	All	12	0.0470588	AMPLIFICATION	1	0.00392157	DEEP DELETION	0	0	mRNA HIGH	3	0.0117647	mRNA LOW	8	0.0313725	FUSION	0	0	MISSENSE, INFRAME, TRUNCATING MUTATIONS (PUTATIVE DRIVER)	0	0
IL6	All	14	0.054902	AMPLIFICATION	6	0.0235294	DEEP DELETION	0	0	mRNA HIGH	7	0.027451	mRNA LOW	1	0.00392157	FUSION	0	0	MISSENSE, INFRAME, TRUNCATING MUTATIONS (PUTATIVE DRIVER)	0	0
IMPDH2	All	20	0.0784314	AMPLIFICATION	0	0	DEEP DELETION	3	0.0117647	mRNA HIGH	8	0.0313725	mRNA LOW	9	0.0352941	FUSION	0	0	MISSENSE, INFRAME, TRUNCATING MUTATIONS (PUTATIVE DRIVER)	0	0
KCNA2	All	13	0.0509804	AMPLIFICATION	0	0	DEEP DELETION	4	0.0156863	mRNA HIGH	9	0.0352941	mRNA LOW	0	0	FUSION	0	0	MISSENSE, INFRAME, TRUNCATING MUTATIONS (PUTATIVE DRIVER)	0	0
KCND2	All	20	0.0784314	AMPLIFICATION	3	0.0117647	DEEP DELETION	0	0	mRNA HIGH	2	0.00784314	mRNA LOW	15	0.0588235	FUSION	0	0	MISSENSE, INFRAME, TRUNCATING MUTATIONS (PUTATIVE DRIVER)	0	0
KCNMA1	All	18	0.0705882	AMPLIFICATION	2	0.00784314	DEEP DELETION	5	0.0196078	mRNA HIGH	3	0.0117647	mRNA LOW	7	0.027451	FUSION	1	0.00392157	MISSENSE, INFRAME, TRUNCATING MUTATIONS (PUTATIVE DRIVER)	0	0
KDM2A	All	18	0.0705882	AMPLIFICATION	4	0.0156863	DEEP DELETION	0	0	mRNA HIGH	5	0.0196078	mRNA LOW	8	0.0313725	FUSION	1	0.00392157	MISSENSE, INFRAME, TRUNCATING MUTATIONS (PUTATIVE DRIVER)	0	0
KDM5A	All	24	0.0941176	AMPLIFICATION	9	0.0352941	DEEP DELETION	2	0.00784314	mRNA HIGH	4	0.0156863	mRNA LOW	9	0.0352941	FUSION	0	0	MISSENSE, INFRAME, TRUNCATING MUTATIONS (PUTATIVE DRIVER)	0	0
KDM5B	All	19	0.0745098	AMPLIFICATION	3	0.0117647	DEEP DELETION	1	0.00392157	mRNA HIGH	4	0.0156863	mRNA LOW	10	0.0392157	FUSION	1	0.00392157	MISSENSE, INFRAME, TRUNCATING MUTATIONS (PUTATIVE DRIVER)	0	0
KDM5C	All	19	0.0745098	AMPLIFICATION	7	0.027451	DEEP DELETION	1	0.00392157	mRNA HIGH	4	0.0156863	mRNA LOW	7	0.027451	FUSION	0	0	MISSENSE, INFRAME, TRUNCATING MUTATIONS (PUTATIVE DRIVER)	0	0
KDM8	All	11	0.0431373	AMPLIFICATION	0	0	DEEP DELETION	0	0	mRNA HIGH	4	0.0156863	mRNA LOW	7	0.027451	FUSION	0	0	MISSENSE, INFRAME, TRUNCATING MUTATIONS (PUTATIVE DRIVER)	0	0
KLF10	All	25	0.0980392	AMPLIFICATION	7	0.027451	DEEP DELETION	2	0.00784314	mRNA HIGH	3	0.0117647	mRNA LOW	13	0.0509804	FUSION	0	0	MISSENSE, INFRAME, TRUNCATING MUTATIONS (PUTATIVE DRIVER)	0	0
KMT2A	All	18	0.0705882	AMPLIFICATION	1	0.00392157	DEEP DELETION	5	0.0196078	mRNA HIGH	6	0.0235294	mRNA LOW	4	0.0156863	FUSION	0	0	MISSENSE, INFRAME, TRUNCATING MUTATIONS (PUTATIVE DRIVER)	2	0.00784314
LEPR	All	23	0.0901961	AMPLIFICATION	9	0.0352941	DEEP DELETION	0	0	mRNA HIGH	11	0.0431373	mRNA LOW	3	0.0117647	FUSION	0	0	MISSENSE, INFRAME, TRUNCATING MUTATIONS (PUTATIVE DRIVER)	0	0
LGR4	All	13	0.0509804	AMPLIFICATION	1	0.00392157	DEEP DELETION	1	0.00392157	mRNA HIGH	5	0.0196078	mRNA LOW	6	0.0235294	FUSION	0	0	MISSENSE, INFRAME, TRUNCATING MUTATIONS (PUTATIVE DRIVER)	0	0
MAGED1	All	15	0.0588235	AMPLIFICATION	5	0.0196078	DEEP DELETION	1	0.00392157	mRNA HIGH	6	0.0235294	mRNA LOW	3	0.0117647	FUSION	0	0	MISSENSE, INFRAME, TRUNCATING MUTATIONS (PUTATIVE DRIVER)	0	0
MAGEL2	All	18	0.0705882	AMPLIFICATION	8	0.0313725	DEEP DELETION	2	0.00784314	mRNA HIGH	8	0.0313725	mRNA LOW	0	0	FUSION	0	0	MISSENSE, INFRAME, TRUNCATING MUTATIONS (PUTATIVE DRIVER)	0	0
MAPK8	All	16	0.0627451	AMPLIFICATION	3	0.0117647	DEEP DELETION	1	0.00392157	mRNA HIGH	0	0	mRNA LOW	12	0.0470588	FUSION	0	0	MISSENSE, INFRAME, TRUNCATING MUTATIONS (PUTATIVE DRIVER)	0	0
MAPK9	All	18	0.0705882	AMPLIFICATION	7	0.027451	DEEP DELETION	1	0.00392157	mRNA HIGH	6	0.0235294	mRNA LOW	4	0.0156863	FUSION	0	0	MISSENSE, INFRAME, TRUNCATING MUTATIONS (PUTATIVE DRIVER)	0	0
MAPK10	All	6	0.0235294	AMPLIFICATION	3	0.0117647	DEEP DELETION	1	0.00392157	mRNA HIGH	0	0	mRNA LOW	1	0.00392157	FUSION	1	0.00392157	MISSENSE, INFRAME, TRUNCATING MUTATIONS (PUTATIVE DRIVER)	0	0
MAT2A	All	17	0.0666667	AMPLIFICATION	9	0.0352941	DEEP DELETION	0	0	mRNA HIGH	3	0.0117647	mRNA LOW	5	0.0196078	FUSION	0	0	MISSENSE, INFRAME, TRUNCATING MUTATIONS (PUTATIVE DRIVER)	0	0
MC3R	All	7	0.027451	AMPLIFICATION	6	0.0235294	DEEP DELETION	0	0	mRNA HIGH	1	0.00392157	mRNA LOW	0	0	FUSION	0	0	MISSENSE, INFRAME, TRUNCATING MUTATIONS (PUTATIVE DRIVER)	0	0
METTL3	All	16	0.0627451	AMPLIFICATION	4	0.0156863	DEEP DELETION	0	0	mRNA HIGH	4	0.0156863	mRNA LOW	8	0.0313725	FUSION	0	0	MISSENSE, INFRAME, TRUNCATING MUTATIONS (PUTATIVE DRIVER)	0	0
MTA1	All	14	0.054902	AMPLIFICATION	6	0.0235294	DEEP DELETION	0	0	mRNA HIGH	7	0.027451	mRNA LOW	1	0.00392157	FUSION	0	0	MISSENSE, INFRAME, TRUNCATING MUTATIONS (PUTATIVE DRIVER)	0	0
MTNR1A	All	15	0.0588235	AMPLIFICATION	2	0.00784314	DEEP DELETION	8	0.0313725	mRNA HIGH	5	0.0196078	mRNA LOW	0	0	FUSION	0	0	MISSENSE, INFRAME, TRUNCATING MUTATIONS (PUTATIVE DRIVER)	0	0
MTNR1B	All	6	0.0235294	AMPLIFICATION	1	0.00392157	DEEP DELETION	1	0.00392157	mRNA HIGH	4	0.0156863	mRNA LOW	0	0	FUSION	0	0	MISSENSE, INFRAME, TRUNCATING MUTATIONS (PUTATIVE DRIVER)	0	0
MTOR	All	17	0.0666667	AMPLIFICATION	6	0.0235294	DEEP DELETION	0	0	mRNA HIGH	3	0.0117647	mRNA LOW	8	0.0313725	FUSION	0	0	MISSENSE, INFRAME, TRUNCATING MUTATIONS (PUTATIVE DRIVER)	0	0
SLC25A19	All	17	0.0666667	AMPLIFICATION	5	0.0196078	DEEP DELETION	0	0	mRNA HIGH	6	0.0235294	mRNA LOW	6	0.0235294	FUSION	0	0	MISSENSE, INFRAME, TRUNCATING MUTATIONS (PUTATIVE DRIVER)	0	0
MYBBP1A	All	16	0.0627451	AMPLIFICATION	4	0.0156863	DEEP DELETION	0	0	mRNA HIGH	6	0.0235294	mRNA LOW	6	0.0235294	FUSION	0	0	MISSENSE, INFRAME, TRUNCATING MUTATIONS (PUTATIVE DRIVER)	0	0
MYCBP2	All	16	0.0627451	AMPLIFICATION	1	0.00392157	DEEP DELETION	2	0.00784314	mRNA HIGH	2	0.00784314	mRNA LOW	11	0.0431373	FUSION	0	0	MISSENSE, INFRAME, TRUNCATING MUTATIONS (PUTATIVE DRIVER)	0	0
NAGLU	All	15	0.0588235	AMPLIFICATION	1	0.00392157	DEEP DELETION	0	0	mRNA HIGH	8	0.0313725	mRNA LOW	6	0.0235294	FUSION	0	0	MISSENSE, INFRAME, TRUNCATING MUTATIONS (PUTATIVE DRIVER)	0	0
NAMPT	All	20	0.0784314	AMPLIFICATION	6	0.0235294	DEEP DELETION	0	0	mRNA HIGH	9	0.0352941	mRNA LOW	5	0.0196078	FUSION	0	0	MISSENSE, INFRAME, TRUNCATING MUTATIONS (PUTATIVE DRIVER)	0	0
NCOA2	All	26	0.101961	AMPLIFICATION	7	0.027451	DEEP DELETION	2	0.00784314	mRNA HIGH	0	0	mRNA LOW	17	0.0666667	FUSION	0	0	MISSENSE, INFRAME, TRUNCATING MUTATIONS (PUTATIVE DRIVER)	0	0
NCOR1	All	40	0.156863	AMPLIFICATION	24	0.0941176	DEEP DELETION	0	0	mRNA HIGH	8	0.0313725	mRNA LOW	7	0.027451	FUSION	1	0.00392157	MISSENSE, INFRAME, TRUNCATING MUTATIONS (PUTATIVE DRIVER)	0	0
NDUFA9	All	22	0.0862745	AMPLIFICATION	9	0.0352941	DEEP DELETION	1	0.00392157	mRNA HIGH	8	0.0313725	mRNA LOW	3	0.0117647	FUSION	1	0.00392157	MISSENSE, INFRAME, TRUNCATING MUTATIONS (PUTATIVE DRIVER)	0	0
NFIL3	All	17	0.0666667	AMPLIFICATION	4	0.0156863	DEEP DELETION	1	0.00392157	mRNA HIGH	3	0.0117647	mRNA LOW	8	0.0313725	FUSION	1	0.00392157	MISSENSE, INFRAME, TRUNCATING MUTATIONS (PUTATIVE DRIVER)	0	0
NGFR	All	10	0.0392157	AMPLIFICATION	2	0.00784314	DEEP DELETION	1	0.00392157	mRNA HIGH	5	0.0196078	mRNA LOW	2	0.00784314	FUSION	0	0	MISSENSE, INFRAME, TRUNCATING MUTATIONS (PUTATIVE DRIVER)	0	0
NKX2-1	All	9	0.0352941	AMPLIFICATION	7	0.027451	DEEP DELETION	0	0	mRNA HIGH	2	0.00784314	mRNA LOW	0	0	FUSION	0	0	MISSENSE, INFRAME, TRUNCATING MUTATIONS (PUTATIVE DRIVER)	0	0
NLGN1	All	21	0.0823529	AMPLIFICATION	3	0.0117647	DEEP DELETION	0	0	mRNA HIGH	0	0	mRNA LOW	17	0.0666667	FUSION	1	0.00392157	MISSENSE, INFRAME, TRUNCATING MUTATIONS (PUTATIVE DRIVER)	0	0
NMS	All	2	0.00784314	AMPLIFICATION	2	0.00784314	DEEP DELETION	0	0	mRNA HIGH	0	0	mRNA LOW	0	0	FUSION	0	0	MISSENSE, INFRAME, TRUNCATING MUTATIONS (PUTATIVE DRIVER)	0	0
NMU	All	10	0.0392157	AMPLIFICATION	5	0.0196078	DEEP DELETION	0	0	mRNA HIGH	5	0.0196078	mRNA LOW	0	0	FUSION	0	0	MISSENSE, INFRAME, TRUNCATING MUTATIONS (PUTATIVE DRIVER)	0	0
NOCT	All	19	0.0745098	AMPLIFICATION	6	0.0235294	DEEP DELETION	1	0.00392157	mRNA HIGH	9	0.0352941	mRNA LOW	3	0.0117647	FUSION	0	0	MISSENSE, INFRAME, TRUNCATING MUTATIONS (PUTATIVE DRIVER)	0	0
NONO	All	21	0.0823529	AMPLIFICATION	6	0.0235294	DEEP DELETION	4	0.0156863	mRNA HIGH	5	0.0196078	mRNA LOW	6	0.0235294	FUSION	0	0	MISSENSE, INFRAME, TRUNCATING MUTATIONS (PUTATIVE DRIVER)	0	0
NPAS2	All	17	0.0666667	AMPLIFICATION	2	0.00784314	DEEP DELETION	2	0.00784314	mRNA HIGH	2	0.00784314	mRNA LOW	10	0.0392157	FUSION	1	0.00392157	MISSENSE, INFRAME, TRUNCATING MUTATIONS (PUTATIVE DRIVER)	0	0
NPS	All	252	0.988235	AMPLIFICATION	0	0	DEEP DELETION	1	0.00392157	mRNA HIGH	0	0	mRNA LOW	251	0.984314	FUSION	0	0	MISSENSE, INFRAME, TRUNCATING MUTATIONS (PUTATIVE DRIVER)	0	0
NPY2R	All	13	0.0509804	AMPLIFICATION	6	0.0235294	DEEP DELETION	1	0.00392157	mRNA HIGH	6	0.0235294	mRNA LOW	0	0	FUSION	0	0	MISSENSE, INFRAME, TRUNCATING MUTATIONS (PUTATIVE DRIVER)	0	0
NR0B2	All	8	0.0313725	AMPLIFICATION	4	0.0156863	DEEP DELETION	1	0.00392157	mRNA HIGH	3	0.0117647	mRNA LOW	0	0	FUSION	0	0	MISSENSE, INFRAME, TRUNCATING MUTATIONS (PUTATIVE DRIVER)	0	0
NR1D1	All	11	0.0431373	AMPLIFICATION	1	0.00392157	DEEP DELETION	0	0	mRNA HIGH	2	0.00784314	mRNA LOW	8	0.0313725	FUSION	0	0	MISSENSE, INFRAME, TRUNCATING MUTATIONS (PUTATIVE DRIVER)	0	0
NR1D2	All	14	0.054902	AMPLIFICATION	2	0.00784314	DEEP DELETION	0	0	mRNA HIGH	5	0.0196078	mRNA LOW	7	0.027451	FUSION	0	0	MISSENSE, INFRAME, TRUNCATING MUTATIONS (PUTATIVE DRIVER)	0	0
NR2F6	All	19	0.0745098	AMPLIFICATION	4	0.0156863	DEEP DELETION	0	0	mRNA HIGH	9	0.0352941	mRNA LOW	6	0.0235294	FUSION	0	0	MISSENSE, INFRAME, TRUNCATING MUTATIONS (PUTATIVE DRIVER)	0	0
NRIP1	All	25	0.0980392	AMPLIFICATION	6	0.0235294	DEEP DELETION	5	0.0196078	mRNA HIGH	3	0.0117647	mRNA LOW	8	0.0313725	FUSION	3	0.0117647	MISSENSE, INFRAME, TRUNCATING MUTATIONS (PUTATIVE DRIVER)	0	0
OGT	All	25	0.0980392	AMPLIFICATION	5	0.0196078	DEEP DELETION	4	0.0156863	mRNA HIGH	10	0.0392157	mRNA LOW	6	0.0235294	FUSION	0	0	MISSENSE, INFRAME, TRUNCATING MUTATIONS (PUTATIVE DRIVER)	0	0
OPN4	All	16	0.0627451	AMPLIFICATION	0	0	DEEP DELETION	4	0.0156863	mRNA HIGH	12	0.0470588	mRNA LOW	0	0	FUSION	0	0	MISSENSE, INFRAME, TRUNCATING MUTATIONS (PUTATIVE DRIVER)	0	0
OPN5	All	7	0.027451	AMPLIFICATION	3	0.0117647	DEEP DELETION	0	0	mRNA HIGH	4	0.0156863	mRNA LOW	0	0	FUSION	0	0	MISSENSE, INFRAME, TRUNCATING MUTATIONS (PUTATIVE DRIVER)	0	0
OPRL1	All	22	0.0862745	AMPLIFICATION	9	0.0352941	DEEP DELETION	0	0	mRNA HIGH	5	0.0196078	mRNA LOW	8	0.0313725	FUSION	0	0	MISSENSE, INFRAME, TRUNCATING MUTATIONS (PUTATIVE DRIVER)	0	0
PDE6B	All	13	0.0509804	AMPLIFICATION	4	0.0156863	DEEP DELETION	2	0.00784314	mRNA HIGH	3	0.0117647	mRNA LOW	4	0.0156863	FUSION	0	0	MISSENSE, INFRAME, TRUNCATING MUTATIONS (PUTATIVE DRIVER)	0	0
PER1	All	17	0.0666667	AMPLIFICATION	5	0.0196078	DEEP DELETION	1	0.00392157	mRNA HIGH	5	0.0196078	mRNA LOW	5	0.0196078	FUSION	1	0.00392157	MISSENSE, INFRAME, TRUNCATING MUTATIONS (PUTATIVE DRIVER)	0	0
PER2	All	31	0.121569	AMPLIFICATION	1	0.00392157	DEEP DELETION	15	0.0588235	mRNA HIGH	6	0.0235294	mRNA LOW	9	0.0352941	FUSION	0	0	MISSENSE, INFRAME, TRUNCATING MUTATIONS (PUTATIVE DRIVER)	0	0
PER3	All	13	0.0509804	AMPLIFICATION	5	0.0196078	DEEP DELETION	1	0.00392157	mRNA HIGH	1	0.00392157	mRNA LOW	6	0.0235294	FUSION	0	0	MISSENSE, INFRAME, TRUNCATING MUTATIONS (PUTATIVE DRIVER)	0	0
PHLPP1	All	27	0.105882	AMPLIFICATION	6	0.0235294	DEEP DELETION	4	0.0156863	mRNA HIGH	9	0.0352941	mRNA LOW	7	0.027451	FUSION	1	0.00392157	MISSENSE, INFRAME, TRUNCATING MUTATIONS (PUTATIVE DRIVER)	0	0
PIWIL2	All	18	0.0705882	AMPLIFICATION	1	0.00392157	DEEP DELETION	1	0.00392157	mRNA HIGH	16	0.0627451	mRNA LOW	0	0	FUSION	0	0	MISSENSE, INFRAME, TRUNCATING MUTATIONS (PUTATIVE DRIVER)	0	0
PMCH	All	19	0.0745098	AMPLIFICATION	6	0.0235294	DEEP DELETION	1	0.00392157	mRNA HIGH	11	0.0431373	mRNA LOW	0	0	FUSION	1	0.00392157	MISSENSE, INFRAME, TRUNCATING MUTATIONS (PUTATIVE DRIVER)	0	0
PML	All	16	0.0627451	AMPLIFICATION	4	0.0156863	DEEP DELETION	1	0.00392157	mRNA HIGH	6	0.0235294	mRNA LOW	5	0.0196078	FUSION	0	0	MISSENSE, INFRAME, TRUNCATING MUTATIONS (PUTATIVE DRIVER)	0	0
PPARA	All	15	0.0588235	AMPLIFICATION	1	0.00392157	DEEP DELETION	1	0.00392157	mRNA HIGH	7	0.027451	mRNA LOW	5	0.0196078	FUSION	1	0.00392157	MISSENSE, INFRAME, TRUNCATING MUTATIONS (PUTATIVE DRIVER)	0	0
PPARG	All	17	0.0666667	AMPLIFICATION	6	0.0235294	DEEP DELETION	0	0	mRNA HIGH	7	0.027451	mRNA LOW	4	0.0156863	FUSION	0	0	MISSENSE, INFRAME, TRUNCATING MUTATIONS (PUTATIVE DRIVER)	0	0
PPARGC1A	All	15	0.0588235	AMPLIFICATION	5	0.0196078	DEEP DELETION	1	0.00392157	mRNA HIGH	2	0.00784314	mRNA LOW	7	0.027451	FUSION	0	0	MISSENSE, INFRAME, TRUNCATING MUTATIONS (PUTATIVE DRIVER)	0	0
PPP1CA	All	15	0.0588235	AMPLIFICATION	3	0.0117647	DEEP DELETION	0	0	mRNA HIGH	9	0.0352941	mRNA LOW	3	0.0117647	FUSION	0	0	MISSENSE, INFRAME, TRUNCATING MUTATIONS (PUTATIVE DRIVER)	0	0
PPP1CB	All	15	0.0588235	AMPLIFICATION	3	0.0117647	DEEP DELETION	0	0	mRNA HIGH	11	0.0431373	mRNA LOW	1	0.00392157	FUSION	0	0	MISSENSE, INFRAME, TRUNCATING MUTATIONS (PUTATIVE DRIVER)	0	0
PPP1CC	All	22	0.0862745	AMPLIFICATION	7	0.027451	DEEP DELETION	1	0.00392157	mRNA HIGH	7	0.027451	mRNA LOW	6	0.0235294	FUSION	1	0.00392157	MISSENSE, INFRAME, TRUNCATING MUTATIONS (PUTATIVE DRIVER)	0	0
PRF1	All	16	0.0627451	AMPLIFICATION	0	0	DEEP DELETION	2	0.00784314	mRNA HIGH	4	0.0156863	mRNA LOW	10	0.0392157	FUSION	0	0	MISSENSE, INFRAME, TRUNCATING MUTATIONS (PUTATIVE DRIVER)	0	0
PRKAA1	All	18	0.0705882	AMPLIFICATION	9	0.0352941	DEEP DELETION	0	0	mRNA HIGH	4	0.0156863	mRNA LOW	5	0.0196078	FUSION	0	0	MISSENSE, INFRAME, TRUNCATING MUTATIONS (PUTATIVE DRIVER)	0	0
PRKAA2	All	13	0.0509804	AMPLIFICATION	9	0.0352941	DEEP DELETION	0	0	mRNA HIGH	0	0	mRNA LOW	4	0.0156863	FUSION	0	0	MISSENSE, INFRAME, TRUNCATING MUTATIONS (PUTATIVE DRIVER)	0	0
PRKCG	All	7	0.027451	AMPLIFICATION	1	0.00392157	DEEP DELETION	2	0.00784314	mRNA HIGH	4	0.0156863	mRNA LOW	0	0	FUSION	0	0	MISSENSE, INFRAME, TRUNCATING MUTATIONS (PUTATIVE DRIVER)	0	0
PRKDC	All	19	0.0745098	AMPLIFICATION	5	0.0196078	DEEP DELETION	1	0.00392157	mRNA HIGH	6	0.0235294	mRNA LOW	7	0.027451	FUSION	0	0	MISSENSE, INFRAME, TRUNCATING MUTATIONS (PUTATIVE DRIVER)	0	0
PRKG1	All	16	0.0627451	AMPLIFICATION	2	0.00784314	DEEP DELETION	2	0.00784314	mRNA HIGH	0	0	mRNA LOW	11	0.0431373	FUSION	1	0.00392157	MISSENSE, INFRAME, TRUNCATING MUTATIONS (PUTATIVE DRIVER)	0	0
PRKG2	All	14	0.054902	AMPLIFICATION	2	0.00784314	DEEP DELETION	1	0.00392157	mRNA HIGH	11	0.0431373	mRNA LOW	0	0	FUSION	0	0	MISSENSE, INFRAME, TRUNCATING MUTATIONS (PUTATIVE DRIVER)	0	0
PRMT5	All	16	0.0627451	AMPLIFICATION	4	0.0156863	DEEP DELETION	0	0	mRNA HIGH	8	0.0313725	mRNA LOW	4	0.0156863	FUSION	0	0	MISSENSE, INFRAME, TRUNCATING MUTATIONS (PUTATIVE DRIVER)	0	0
PROK1	All	14	0.054902	AMPLIFICATION	0	0	DEEP DELETION	4	0.0156863	mRNA HIGH	10	0.0392157	mRNA LOW	0	0	FUSION	0	0	MISSENSE, INFRAME, TRUNCATING MUTATIONS (PUTATIVE DRIVER)	0	0
PROK2	All	16	0.0627451	AMPLIFICATION	0	0	DEEP DELETION	2	0.00784314	mRNA HIGH	14	0.054902	mRNA LOW	0	0	FUSION	0	0	MISSENSE, INFRAME, TRUNCATING MUTATIONS (PUTATIVE DRIVER)	0	0
PROKR1	All	12	0.0470588	AMPLIFICATION	3	0.0117647	DEEP DELETION	0	0	mRNA HIGH	9	0.0352941	mRNA LOW	0	0	FUSION	0	0	MISSENSE, INFRAME, TRUNCATING MUTATIONS (PUTATIVE DRIVER)	0	0
PROKR2	All	8	0.0313725	AMPLIFICATION	3	0.0117647	DEEP DELETION	0	0	mRNA HIGH	5	0.0196078	mRNA LOW	0	0	FUSION	0	0	MISSENSE, INFRAME, TRUNCATING MUTATIONS (PUTATIVE DRIVER)	0	0
PROX1	All	10	0.0392157	AMPLIFICATION	1	0.00392157	DEEP DELETION	2	0.00784314	mRNA HIGH	7	0.027451	mRNA LOW	0	0	FUSION	0	0	MISSENSE, INFRAME, TRUNCATING MUTATIONS (PUTATIVE DRIVER)	0	0
PSPC1	All	24	0.0941176	AMPLIFICATION	8	0.0313725	DEEP DELETION	4	0.0156863	mRNA HIGH	9	0.0352941	mRNA LOW	3	0.0117647	FUSION	0	0	MISSENSE, INFRAME, TRUNCATING MUTATIONS (PUTATIVE DRIVER)	0	0
PTEN	All	34	0.133333	AMPLIFICATION	0	0	DEEP DELETION	15	0.0588235	mRNA HIGH	3	0.0117647	mRNA LOW	10	0.0392157	FUSION	0	0	MISSENSE, INFRAME, TRUNCATING MUTATIONS (PUTATIVE DRIVER)	6	0.0235294
PTGDS	All	13	0.0509804	AMPLIFICATION	3	0.0117647	DEEP DELETION	2	0.00784314	mRNA HIGH	6	0.0235294	mRNA LOW	2	0.00784314	FUSION	0	0	MISSENSE, INFRAME, TRUNCATING MUTATIONS (PUTATIVE DRIVER)	0	0
PTGER3	All	14	0.054902	AMPLIFICATION	7	0.027451	DEEP DELETION	1	0.00392157	mRNA HIGH	0	0	mRNA LOW	6	0.0235294	FUSION	0	0	MISSENSE, INFRAME, TRUNCATING MUTATIONS (PUTATIVE DRIVER)	0	0
PTGER4	All	20	0.0784314	AMPLIFICATION	9	0.0352941	DEEP DELETION	0	0	mRNA HIGH	3	0.0117647	mRNA LOW	8	0.0313725	FUSION	0	0	MISSENSE, INFRAME, TRUNCATING MUTATIONS (PUTATIVE DRIVER)	0	0
RAI1	All	35	0.137255	AMPLIFICATION	22	0.0862745	DEEP DELETION	0	0	mRNA HIGH	5	0.0196078	mRNA LOW	8	0.0313725	FUSION	0	0	MISSENSE, INFRAME, TRUNCATING MUTATIONS (PUTATIVE DRIVER)	0	0
RBM4	All	18	0.0705882	AMPLIFICATION	4	0.0156863	DEEP DELETION	0	0	mRNA HIGH	9	0.0352941	mRNA LOW	5	0.0196078	FUSION	0	0	MISSENSE, INFRAME, TRUNCATING MUTATIONS (PUTATIVE DRIVER)	0	0
RBM4B	All	14	0.054902	AMPLIFICATION	4	0.0156863	DEEP DELETION	0	0	mRNA HIGH	5	0.0196078	mRNA LOW	4	0.0156863	FUSION	1	0.00392157	MISSENSE, INFRAME, TRUNCATING MUTATIONS (PUTATIVE DRIVER)	0	0
RELB	All	20	0.0784314	AMPLIFICATION	3	0.0117647	DEEP DELETION	2	0.00784314	mRNA HIGH	6	0.0235294	mRNA LOW	9	0.0352941	FUSION	0	0	MISSENSE, INFRAME, TRUNCATING MUTATIONS (PUTATIVE DRIVER)	0	0
ROCK2	All	16	0.0627451	AMPLIFICATION	1	0.00392157	DEEP DELETION	0	0	mRNA HIGH	2	0.00784314	mRNA LOW	13	0.0509804	FUSION	0	0	MISSENSE, INFRAME, TRUNCATING MUTATIONS (PUTATIVE DRIVER)	0	0
RORA	All	20	0.0784314	AMPLIFICATION	3	0.0117647	DEEP DELETION	0	0	mRNA HIGH	5	0.0196078	mRNA LOW	9	0.0352941	FUSION	3	0.0117647	MISSENSE, INFRAME, TRUNCATING MUTATIONS (PUTATIVE DRIVER)	0	0
RORB	All	14	0.054902	AMPLIFICATION	6	0.0235294	DEEP DELETION	0	0	mRNA HIGH	8	0.0313725	mRNA LOW	0	0	FUSION	0	0	MISSENSE, INFRAME, TRUNCATING MUTATIONS (PUTATIVE DRIVER)	0	0
RORC	All	24	0.0941176	AMPLIFICATION	12	0.0470588	DEEP DELETION	1	0.00392157	mRNA HIGH	11	0.0431373	mRNA LOW	0	0	FUSION	0	0	MISSENSE, INFRAME, TRUNCATING MUTATIONS (PUTATIVE DRIVER)	0	0
SETX	All	17	0.0666667	AMPLIFICATION	2	0.00784314	DEEP DELETION	3	0.0117647	mRNA HIGH	5	0.0196078	mRNA LOW	7	0.027451	FUSION	0	0	MISSENSE, INFRAME, TRUNCATING MUTATIONS (PUTATIVE DRIVER)	0	0
SFPQ	All	13	0.0509804	AMPLIFICATION	2	0.00784314	DEEP DELETION	0	0	mRNA HIGH	7	0.027451	mRNA LOW	4	0.0156863	FUSION	0	0	MISSENSE, INFRAME, TRUNCATING MUTATIONS (PUTATIVE DRIVER)	0	0
SIAH2	All	11	0.0431373	AMPLIFICATION	1	0.00392157	DEEP DELETION	0	0	mRNA HIGH	5	0.0196078	mRNA LOW	5	0.0196078	FUSION	0	0	MISSENSE, INFRAME, TRUNCATING MUTATIONS (PUTATIVE DRIVER)	0	0
SIK1	All	16	0.0627451	AMPLIFICATION	3	0.0117647	DEEP DELETION	0	0	mRNA HIGH	8	0.0313725	mRNA LOW	5	0.0196078	FUSION	0	0	MISSENSE, INFRAME, TRUNCATING MUTATIONS (PUTATIVE DRIVER)	0	0
SIN3A	All	13	0.0509804	AMPLIFICATION	4	0.0156863	DEEP DELETION	0	0	mRNA HIGH	2	0.00784314	mRNA LOW	7	0.027451	FUSION	0	0	MISSENSE, INFRAME, TRUNCATING MUTATIONS (PUTATIVE DRIVER)	0	0
SIRT1	All	16	0.0627451	AMPLIFICATION	0	0	DEEP DELETION	3	0.0117647	mRNA HIGH	2	0.00784314	mRNA LOW	11	0.0431373	FUSION	0	0	MISSENSE, INFRAME, TRUNCATING MUTATIONS (PUTATIVE DRIVER)	0	0
SIX3	All	11	0.0431373	AMPLIFICATION	0	0	DEEP DELETION	0	0	mRNA HIGH	11	0.0431373	mRNA LOW	0	0	FUSION	0	0	MISSENSE, INFRAME, TRUNCATING MUTATIONS (PUTATIVE DRIVER)	0	0
SLC6A4	All	12	0.0470588	AMPLIFICATION	1	0.00392157	DEEP DELETION	2	0.00784314	mRNA HIGH	9	0.0352941	mRNA LOW	0	0	FUSION	0	0	MISSENSE, INFRAME, TRUNCATING MUTATIONS (PUTATIVE DRIVER)	0	0
SOX14	All	3	0.0117647	AMPLIFICATION	2	0.00784314	DEEP DELETION	0	0	mRNA HIGH	1	0.00392157	mRNA LOW	0	0	FUSION	0	0	MISSENSE, INFRAME, TRUNCATING MUTATIONS (PUTATIVE DRIVER)	0	0
SPSB4	All	15	0.0588235	AMPLIFICATION	3	0.0117647	DEEP DELETION	0	0	mRNA HIGH	0	0	mRNA LOW	12	0.0470588	FUSION	0	0	MISSENSE, INFRAME, TRUNCATING MUTATIONS (PUTATIVE DRIVER)	0	0
SRRD	All	16	0.0627451	AMPLIFICATION	1	0.00392157	DEEP DELETION	1	0.00392157	mRNA HIGH	10	0.0392157	mRNA LOW	4	0.0156863	FUSION	0	0	MISSENSE, INFRAME, TRUNCATING MUTATIONS (PUTATIVE DRIVER)	0	0
SUV39H1	All	13	0.0509804	AMPLIFICATION	2	0.00784314	DEEP DELETION	1	0.00392157	mRNA HIGH	5	0.0196078	mRNA LOW	5	0.0196078	FUSION	0	0	MISSENSE, INFRAME, TRUNCATING MUTATIONS (PUTATIVE DRIVER)	0	0
SUV39H2	All	17	0.0666667	AMPLIFICATION	3	0.0117647	DEEP DELETION	1	0.00392157	mRNA HIGH	9	0.0352941	mRNA LOW	4	0.0156863	FUSION	0	0	MISSENSE, INFRAME, TRUNCATING MUTATIONS (PUTATIVE DRIVER)	0	0
TARDBP	All	17	0.0666667	AMPLIFICATION	6	0.0235294	DEEP DELETION	0	0	mRNA HIGH	7	0.027451	mRNA LOW	4	0.0156863	FUSION	0	0	MISSENSE, INFRAME, TRUNCATING MUTATIONS (PUTATIVE DRIVER)	0	0
THRAP3	All	13	0.0509804	AMPLIFICATION	2	0.00784314	DEEP DELETION	0	0	mRNA HIGH	3	0.0117647	mRNA LOW	8	0.0313725	FUSION	0	0	MISSENSE, INFRAME, TRUNCATING MUTATIONS (PUTATIVE DRIVER)	0	0
TIMELESS	All	18	0.0705882	AMPLIFICATION	5	0.0196078	DEEP DELETION	1	0.00392157	mRNA HIGH	5	0.0196078	mRNA LOW	7	0.027451	FUSION	0	0	MISSENSE, INFRAME, TRUNCATING MUTATIONS (PUTATIVE DRIVER)	0	0
TNFRSF11A	All	24	0.0941176	AMPLIFICATION	5	0.0196078	DEEP DELETION	4	0.0156863	mRNA HIGH	6	0.0235294	mRNA LOW	9	0.0352941	FUSION	0	0	MISSENSE, INFRAME, TRUNCATING MUTATIONS (PUTATIVE DRIVER)	0	0
TOP1	All	19	0.0745098	AMPLIFICATION	4	0.0156863	DEEP DELETION	0	0	mRNA HIGH	6	0.0235294	mRNA LOW	6	0.0235294	FUSION	3	0.0117647	MISSENSE, INFRAME, TRUNCATING MUTATIONS (PUTATIVE DRIVER)	0	0
TOP2A	All	13	0.0509804	AMPLIFICATION	1	0.00392157	DEEP DELETION	0	0	mRNA HIGH	1	0.00392157	mRNA LOW	10	0.0392157	FUSION	1	0.00392157	MISSENSE, INFRAME, TRUNCATING MUTATIONS (PUTATIVE DRIVER)	0	0
TP53	All	131	0.513725	AMPLIFICATION	1	0.00392157	DEEP DELETION	25	0.0980392	mRNA HIGH	0	0	mRNA LOW	11	0.0431373	FUSION	10	0.0392157	MISSENSE, INFRAME, TRUNCATING MUTATIONS (PUTATIVE DRIVER)	84	0.329412
UBE3A	All	16	0.0627451	AMPLIFICATION	5	0.0196078	DEEP DELETION	1	0.00392157	mRNA HIGH	4	0.0156863	mRNA LOW	6	0.0235294	FUSION	0	0	MISSENSE, INFRAME, TRUNCATING MUTATIONS (PUTATIVE DRIVER)	0	0
USP2	All	23	0.0901961	AMPLIFICATION	2	0.00784314	DEEP DELETION	4	0.0156863	mRNA HIGH	9	0.0352941	mRNA LOW	8	0.0313725	FUSION	0	0	MISSENSE, INFRAME, TRUNCATING MUTATIONS (PUTATIVE DRIVER)	0	0
USP7	All	14	0.054902	AMPLIFICATION	4	0.0156863	DEEP DELETION	0	0	mRNA HIGH	7	0.027451	mRNA LOW	3	0.0117647	FUSION	0	0	MISSENSE, INFRAME, TRUNCATING MUTATIONS (PUTATIVE DRIVER)	0	0
USP9X	All	15	0.0588235	AMPLIFICATION	7	0.027451	DEEP DELETION	1	0.00392157	mRNA HIGH	3	0.0117647	mRNA LOW	4	0.0156863	FUSION	0	0	MISSENSE, INFRAME, TRUNCATING MUTATIONS (PUTATIVE DRIVER)	0	0
UTS2	All	14	0.054902	AMPLIFICATION	5	0.0196078	DEEP DELETION	0	0	mRNA HIGH	9	0.0352941	mRNA LOW	0	0	FUSION	0	0	MISSENSE, INFRAME, TRUNCATING MUTATIONS (PUTATIVE DRIVER)	0	0
UTS2R	All	20	0.0784314	AMPLIFICATION	6	0.0235294	DEEP DELETION	4	0.0156863	mRNA HIGH	10	0.0392157	mRNA LOW	0	0	FUSION	0	0	MISSENSE, INFRAME, TRUNCATING MUTATIONS (PUTATIVE DRIVER)	0	0
ZFHX3	All	12	0.0470588	AMPLIFICATION	0	0	DEEP DELETION	2	0.00784314	mRNA HIGH	4	0.0156863	mRNA LOW	6	0.0235294	FUSION	0	0	MISSENSE, INFRAME, TRUNCATING MUTATIONS (PUTATIVE DRIVER)	0	0
ZPBP2	All	1	0.00392157	AMPLIFICATION	0	0	DEEP DELETION	0	0	mRNA HIGH	1	0.00392157	mRNA LOW	0	0	FUSION	0	0	MISSENSE, INFRAME, TRUNCATING MUTATIONS (PUTATIVE DRIVER)	0	0

[truncated: 35 more sheets: ST_11, ST_12, ST_13, ST_14, ST_15, ST_16, ST_17, ST_18, ST_19, ST_20, ST_21, ST_22, ST_23, ST_24, ST_25, ST_26, ST_27, ST_28, ST_29, ST_30 …]
